# Supplementary material for: Gene expression and metabolic pathways related to cell growth and lipid synthesis in diatom Nitzschia ZJU2 after two rounds of mutagenesis by γ-rays
Source: Royal Society of Chemistry journal article supplement (doi:10.1039/c4ra03359k), 2014-01-01
Supplement: c4ra03359k1.xlsx [file c4ra03359k1.xlsx]

## Sheet: Appendix A
ID	nr annotation	gene	ko	go	Position	AH_base_n	AH_base_p	BH_base_n	BH_base_p	coden_pos	type
gi|219110367|ref|XP_002176935.1|	precursor of protein zeaxanthin epoxidase-like protein [Phaeodactylum tricornutum CCAP 1055/1]	ZEP, ABA1	K09838	GO:0016709;GO:0055114;GO:0016491	111	T	V	T	V	3	S
gi|219110367|ref|XP_002176935.1|	precursor of protein zeaxanthin epoxidase-like protein [Phaeodactylum tricornutum CCAP 1055/1]	ZEP, ABA1	K09838	GO:0016709;GO:0055114;GO:0016491	480	G	R	G	R	3	S
gi|219110367|ref|XP_002176935.1|	precursor of protein zeaxanthin epoxidase-like protein [Phaeodactylum tricornutum CCAP 1055/1]	ZEP, ABA1	K09838	GO:0016709;GO:0055114;GO:0016491	483	T	V	T	V	3	S
gi|219110367|ref|XP_002176935.1|	precursor of protein zeaxanthin epoxidase-like protein [Phaeodactylum tricornutum CCAP 1055/1]	ZEP, ABA1	K09838	GO:0016709;GO:0055114;GO:0016491	522	G	G	G	G	3	S
gi|219110367|ref|XP_002176935.1|	precursor of protein zeaxanthin epoxidase-like protein [Phaeodactylum tricornutum CCAP 1055/1]	ZEP, ABA1	K09838	GO:0016709;GO:0055114;GO:0016491	552	C	S	C	S	3	S
gi|219110367|ref|XP_002176935.1|	precursor of protein zeaxanthin epoxidase-like protein [Phaeodactylum tricornutum CCAP 1055/1]	ZEP, ABA1	K09838	GO:0016709;GO:0055114;GO:0016491	1260	G	R	G	R	3	S
gi|219110367|ref|XP_002176935.1|	precursor of protein zeaxanthin epoxidase-like protein [Phaeodactylum tricornutum CCAP 1055/1]	ZEP, ABA1	K09838	GO:0016709;GO:0055114;GO:0016491	1389	C	A	C	A	3	S
gi|219117525|ref|XP_002179557.1|	predicted protein [Phaeodactylum tricornutum CCAP 1055/1]	YND1	K14642	GO:0016787	1482	G	R	G	R	3	S
gi|290985529|ref|XP_002675478.1|	predicted protein [Naegleria predicted protein [Naegleria gruberi]	YKT6	K08516	GO:0016020;GO:0016192;GO:0016021;GO:0006810	36	C	T	C	T	3	S
gi|290985529|ref|XP_002675478.1|	predicted protein [Naegleria predicted protein [Naegleria gruberi]	YKT6	K08516	GO:0016020;GO:0016192;GO:0016021;GO:0006810	159	A	K	A	K	3	S
gi|290985529|ref|XP_002675478.1|	predicted protein [Naegleria predicted protein [Naegleria gruberi]	YKT6	K08516	GO:0016020;GO:0016192;GO:0016021;GO:0006810	171	G	G	G	G	3	S
gi|290985529|ref|XP_002675478.1|	predicted protein [Naegleria predicted protein [Naegleria gruberi]	YKT6	K08516	GO:0016020;GO:0016192;GO:0016021;GO:0006810	411	A	K	A	K	3	S
gi|290985529|ref|XP_002675478.1|	predicted protein [Naegleria predicted protein [Naegleria gruberi]	YKT6	K08516	GO:0016020;GO:0016192;GO:0016021;GO:0006810	414	A	Y	A	Y	3	S
gi|290985529|ref|XP_002675478.1|	predicted protein [Naegleria predicted protein [Naegleria gruberi]	YKT6	K08516	GO:0016020;GO:0016192;GO:0016021;GO:0006810	417	A	Q	A	Q	3	S
gi|290985529|ref|XP_002675478.1|	predicted protein [Naegleria predicted protein [Naegleria gruberi]	YKT6	K08516	GO:0016020;GO:0016192;GO:0016021;GO:0006810	420	C	P	C	P	3	S
gi|290985529|ref|XP_002675478.1|	predicted protein [Naegleria predicted protein [Naegleria gruberi]	YKT6	K08516	GO:0016020;GO:0016192;GO:0016021;GO:0006810	423	C	A	C	A	3	S
gi|290985529|ref|XP_002675478.1|	predicted protein [Naegleria predicted protein [Naegleria gruberi]	YKT6	K08516	GO:0016020;GO:0016192;GO:0016021;GO:0006810	426	A	D	A	D	3	S
gi|290985529|ref|XP_002675478.1|	predicted protein [Naegleria predicted protein [Naegleria gruberi]	YKT6	K08516	GO:0016020;GO:0016192;GO:0016021;GO:0006810	441	A	K	A	K	3	S
gi|290985529|ref|XP_002675478.1|	predicted protein [Naegleria predicted protein [Naegleria gruberi]	YKT6	K08516	GO:0016020;GO:0016192;GO:0016021;GO:0006810	450	A	H	A	H	3	S
gi|290985529|ref|XP_002675478.1|	predicted protein [Naegleria predicted protein [Naegleria gruberi]	YKT6	K08516	GO:0016020;GO:0016192;GO:0016021;GO:0006810	453	C	T	C	T	3	S
gi|290985529|ref|XP_002675478.1|	predicted protein [Naegleria predicted protein [Naegleria gruberi]	YKT6	K08516	GO:0016020;GO:0016192;GO:0016021;GO:0006810	462	T	V	T	V	3	S
gi|290985529|ref|XP_002675478.1|	predicted protein [Naegleria predicted protein [Naegleria gruberi]	YKT6	K08516	GO:0016020;GO:0016192;GO:0016021;GO:0006810	477	A	D	A	D	3	S
gi|290985529|ref|XP_002675478.1|	predicted protein [Naegleria predicted protein [Naegleria gruberi]	YKT6	K08516	GO:0016020;GO:0016192;GO:0016021;GO:0006810	483	T	V	T	V	3	S
gi|290985529|ref|XP_002675478.1|	predicted protein [Naegleria predicted protein [Naegleria gruberi]	YKT6	K08516	GO:0016020;GO:0016192;GO:0016021;GO:0006810	489	A	D	A	D	3	S
gi|290985529|ref|XP_002675478.1|	predicted protein [Naegleria predicted protein [Naegleria gruberi]	YKT6	K08516	GO:0016020;GO:0016192;GO:0016021;GO:0006810	495	G	S	G	S	3	S
gi|219120081|ref|XP_002180787.1|	predicted protein [Phaeodactylum tricornutum CCAP 1055/1]	yidC, spoIIIJ, OXA1	K03217	GO:0016020;GO:0051205;GO:0016021	393	T	F	T	F	3	S
gi|219120081|ref|XP_002180787.1|	predicted protein [Phaeodactylum tricornutum CCAP 1055/1]	yidC, spoIIIJ, OXA1	K03217	GO:0016020;GO:0051205;GO:0016021	546	A	Y	A	Y	3	S
gi|219120081|ref|XP_002180787.1|	predicted protein [Phaeodactylum tricornutum CCAP 1055/1]	yidC, spoIIIJ, OXA1	K03217	GO:0016020;GO:0051205;GO:0016021	1047	A	Y	A	Y	3	S
gi|219130463|ref|XP_002185384.1|	predicted protein [Phaeodactylum tricornutum CCAP 1055/1]	yhbH	K05808	GO:0044238	39	G	R	G	R	3	S
gi|219130463|ref|XP_002185384.1|	predicted protein [Phaeodactylum tricornutum CCAP 1055/1]	yhbH	K05808	GO:0044238	57	G	C	G	C	3	S
gi|219130463|ref|XP_002185384.1|	predicted protein [Phaeodactylum tricornutum CCAP 1055/1]	yhbH	K05808	GO:0044238	69	C	P	C	P	3	S
gi|219130463|ref|XP_002185384.1|	predicted protein [Phaeodactylum tricornutum CCAP 1055/1]	yhbH	K05808	GO:0044238	81	G	S	G	S	3	S
gi|219130463|ref|XP_002185384.1|	predicted protein [Phaeodactylum tricornutum CCAP 1055/1]	yhbH	K05808	GO:0044238	114	C	A	C	A	3	S
gi|219130463|ref|XP_002185384.1|	predicted protein [Phaeodactylum tricornutum CCAP 1055/1]	yhbH	K05808	GO:0044238	150	T	F	T	F	3	S
gi|219130463|ref|XP_002185384.1|	predicted protein [Phaeodactylum tricornutum CCAP 1055/1]	yhbH	K05808	GO:0044238	174	C	T	C	T	3	S
gi|219130463|ref|XP_002185384.1|	predicted protein [Phaeodactylum tricornutum CCAP 1055/1]	yhbH	K05808	GO:0044238	189	C	A	C	A	3	S
gi|219130463|ref|XP_002185384.1|	predicted protein [Phaeodactylum tricornutum CCAP 1055/1]	yhbH	K05808	GO:0044238	222	C	T	C	T	3	S
gi|219130463|ref|XP_002185384.1|	predicted protein [Phaeodactylum tricornutum CCAP 1055/1]	yhbH	K05808	GO:0044238	225	C	P	C	P	3	S
gi|219130463|ref|XP_002185384.1|	predicted protein [Phaeodactylum tricornutum CCAP 1055/1]	yhbH	K05808	GO:0044238	228	C	A	C	A	3	S
gi|219130463|ref|XP_002185384.1|	predicted protein [Phaeodactylum tricornutum CCAP 1055/1]	yhbH	K05808	GO:0044238	240	A	E	A	E	3	S
gi|219130463|ref|XP_002185384.1|	predicted protein [Phaeodactylum tricornutum CCAP 1055/1]	yhbH	K05808	GO:0044238	246	G	G	G	G	3	S
gi|219130463|ref|XP_002185384.1|	predicted protein [Phaeodactylum tricornutum CCAP 1055/1]	yhbH	K05808	GO:0044238	279	A	D	A	D	3	S
gi|219130463|ref|XP_002185384.1|	predicted protein [Phaeodactylum tricornutum CCAP 1055/1]	yhbH	K05808	GO:0044238	282	T	V	T	V	3	S
gi|219130463|ref|XP_002185384.1|	predicted protein [Phaeodactylum tricornutum CCAP 1055/1]	yhbH	K05808	GO:0044238	288	C	S	C	S	3	S
gi|219130463|ref|XP_002185384.1|	predicted protein [Phaeodactylum tricornutum CCAP 1055/1]	yhbH	K05808	GO:0044238	291	T	V	T	V	3	S
gi|219130463|ref|XP_002185384.1|	predicted protein [Phaeodactylum tricornutum CCAP 1055/1]	yhbH	K05808	GO:0044238	312	A	H	A	H	3	S
gi|219130463|ref|XP_002185384.1|	predicted protein [Phaeodactylum tricornutum CCAP 1055/1]	yhbH	K05808	GO:0044238	327	C	T	C	T	3	S
gi|219130463|ref|XP_002185384.1|	predicted protein [Phaeodactylum tricornutum CCAP 1055/1]	yhbH	K05808	GO:0044238	348	A	E	A	E	3	S
gi|219130463|ref|XP_002185384.1|	predicted protein [Phaeodactylum tricornutum CCAP 1055/1]	yhbH	K05808	GO:0044238	351	A	E	A	E	3	S
gi|219130463|ref|XP_002185384.1|	predicted protein [Phaeodactylum tricornutum CCAP 1055/1]	yhbH	K05808	GO:0044238	360	A	D	A	D	3	S
gi|219130463|ref|XP_002185384.1|	predicted protein [Phaeodactylum tricornutum CCAP 1055/1]	yhbH	K05808	GO:0044238	366	A	Y	A	Y	3	S
gi|219130463|ref|XP_002185384.1|	predicted protein [Phaeodactylum tricornutum CCAP 1055/1]	yhbH	K05808	GO:0044238	369	C	A	C	A	3	S
gi|219130463|ref|XP_002185384.1|	predicted protein [Phaeodactylum tricornutum CCAP 1055/1]	yhbH	K05808	GO:0044238	378	T	V	T	V	3	S
gi|219130463|ref|XP_002185384.1|	predicted protein [Phaeodactylum tricornutum CCAP 1055/1]	yhbH	K05808	GO:0044238	387	A	K	A	K	3	S
gi|219130463|ref|XP_002185384.1|	predicted protein [Phaeodactylum tricornutum CCAP 1055/1]	yhbH	K05808	GO:0044238	393	A	K	A	K	3	S
gi|219130463|ref|XP_002185384.1|	predicted protein [Phaeodactylum tricornutum CCAP 1055/1]	yhbH	K05808	GO:0044238	399	A	E	A	E	3	S
gi|219130463|ref|XP_002185384.1|	predicted protein [Phaeodactylum tricornutum CCAP 1055/1]	yhbH	K05808	GO:0044238	420	G	G	G	G	3	S
gi|219130463|ref|XP_002185384.1|	predicted protein [Phaeodactylum tricornutum CCAP 1055/1]	yhbH	K05808	GO:0044238	429	G	G	G	G	3	S
gi|219130463|ref|XP_002185384.1|	predicted protein [Phaeodactylum tricornutum CCAP 1055/1]	yhbH	K05808	GO:0044238	447	A	D	A	D	3	S
gi|219130463|ref|XP_002185384.1|	predicted protein [Phaeodactylum tricornutum CCAP 1055/1]	yhbH	K05808	GO:0044238	462	A	E	A	E	3	S
gi|219130463|ref|XP_002185384.1|	predicted protein [Phaeodactylum tricornutum CCAP 1055/1]	yhbH	K05808	GO:0044238	477	T	V	T	V	3	S
gi|219130463|ref|XP_002185384.1|	predicted protein [Phaeodactylum tricornutum CCAP 1055/1]	yhbH	K05808	GO:0044238	483	C	P	C	P	3	S
gi|219130463|ref|XP_002185384.1|	predicted protein [Phaeodactylum tricornutum CCAP 1055/1]	yhbH	K05808	GO:0044238	507	C	A	C	A	3	S
gi|219130463|ref|XP_002185384.1|	predicted protein [Phaeodactylum tricornutum CCAP 1055/1]	yhbH	K05808	GO:0044238	513	C	T	C	T	3	S
gi|219130463|ref|XP_002185384.1|	predicted protein [Phaeodactylum tricornutum CCAP 1055/1]	yhbH	K05808	GO:0044238	570	C	S	C	S	3	S
gi|219130463|ref|XP_002185384.1|	predicted protein [Phaeodactylum tricornutum CCAP 1055/1]	yhbH	K05808	GO:0044238	594	C	T	C	T	3	S
gi|219124266|ref|XP_002182429.1|	predicted protein [Phaeodactylum tricornutum CCAP 1055/1]	ybeB	K09710	_	48	C	T	C	T	3	S
gi|219124266|ref|XP_002182429.1|	predicted protein [Phaeodactylum tricornutum CCAP 1055/1]	ybeB	K09710	_	246	C	A	C	A	3	S
gi|219117507|ref|XP_002179548.1|	predicted protein [Phaeodactylum tricornutum CCAP 1055/1]	YARS, tyrS	K01866	GO:0000162;GO:0005737;GO:0009094;GO:0004831;GO:0006571;GO:0005524;GO:0006437	1890	A	K	A	K	3	S
gi|489255970|ref|WP_003163915.1|	zinc-binding dehydrogenase [Brevundimonas diminuta]	yahK	K13979	GO:0055114;GO:0000166;GO:0008270;GO:0016491	213	T	F	T	F	3	S
gi|489255970|ref|WP_003163915.1|	zinc-binding dehydrogenase [Brevundimonas diminuta]	yahK	K13979	GO:0055114;GO:0000166;GO:0008270;GO:0016491	222	A	E	A	E	3	S
gi|489255970|ref|WP_003163915.1|	zinc-binding dehydrogenase [Brevundimonas diminuta]	yahK	K13979	GO:0055114;GO:0000166;GO:0008270;GO:0016491	333	G	G	G	G	3	S
gi|489255970|ref|WP_003163915.1|	zinc-binding dehydrogenase [Brevundimonas diminuta]	yahK	K13979	GO:0055114;GO:0000166;GO:0008270;GO:0016491	336	C	P	C	P	3	S
gi|489255970|ref|WP_003163915.1|	zinc-binding dehydrogenase [Brevundimonas diminuta]	yahK	K13979	GO:0055114;GO:0000166;GO:0008270;GO:0016491	342	A	D	A	D	3	S
gi|489255970|ref|WP_003163915.1|	zinc-binding dehydrogenase [Brevundimonas diminuta]	yahK	K13979	GO:0055114;GO:0000166;GO:0008270;GO:0016491	354	G	G	G	G	3	S
gi|489255970|ref|WP_003163915.1|	zinc-binding dehydrogenase [Brevundimonas diminuta]	yahK	K13979	GO:0055114;GO:0000166;GO:0008270;GO:0016491	366	A	D	A	D	3	S
gi|489255970|ref|WP_003163915.1|	zinc-binding dehydrogenase [Brevundimonas diminuta]	yahK	K13979	GO:0055114;GO:0000166;GO:0008270;GO:0016491	378	G	G	G	G	3	S
gi|489255970|ref|WP_003163915.1|	zinc-binding dehydrogenase [Brevundimonas diminuta]	yahK	K13979	GO:0055114;GO:0000166;GO:0008270;GO:0016491	396	C	A	C	A	3	S
gi|489255970|ref|WP_003163915.1|	zinc-binding dehydrogenase [Brevundimonas diminuta]	yahK	K13979	GO:0055114;GO:0000166;GO:0008270;GO:0016491	420	G	R	G	R	3	S
gi|489255970|ref|WP_003163915.1|	zinc-binding dehydrogenase [Brevundimonas diminuta]	yahK	K13979	GO:0055114;GO:0000166;GO:0008270;GO:0016491	486	C	A	C	A	3	S
gi|489255970|ref|WP_003163915.1|	zinc-binding dehydrogenase [Brevundimonas diminuta]	yahK	K13979	GO:0055114;GO:0000166;GO:0008270;GO:0016491	492	C	A	C	A	3	S
gi|489255970|ref|WP_003163915.1|	zinc-binding dehydrogenase [Brevundimonas diminuta]	yahK	K13979	GO:0055114;GO:0000166;GO:0008270;GO:0016491	564	C	P	C	P	3	S
gi|489255970|ref|WP_003163915.1|	zinc-binding dehydrogenase [Brevundimonas diminuta]	yahK	K13979	GO:0055114;GO:0000166;GO:0008270;GO:0016491	576	C	T	C	T	3	S
gi|489255970|ref|WP_003163915.1|	zinc-binding dehydrogenase [Brevundimonas diminuta]	yahK	K13979	GO:0055114;GO:0000166;GO:0008270;GO:0016491	600	G	R	G	R	3	S
gi|489255970|ref|WP_003163915.1|	zinc-binding dehydrogenase [Brevundimonas diminuta]	yahK	K13979	GO:0055114;GO:0000166;GO:0008270;GO:0016491	642	C	P	C	P	3	S
gi|489255970|ref|WP_003163915.1|	zinc-binding dehydrogenase [Brevundimonas diminuta]	yahK	K13979	GO:0055114;GO:0000166;GO:0008270;GO:0016491	717	G	S	G	S	3	S
gi|489255970|ref|WP_003163915.1|	zinc-binding dehydrogenase [Brevundimonas diminuta]	yahK	K13979	GO:0055114;GO:0000166;GO:0008270;GO:0016491	729	C	P	C	P	3	S
gi|489255970|ref|WP_003163915.1|	zinc-binding dehydrogenase [Brevundimonas diminuta]	yahK	K13979	GO:0055114;GO:0000166;GO:0008270;GO:0016491	747	C	P	C	P	3	S
gi|489255970|ref|WP_003163915.1|	zinc-binding dehydrogenase [Brevundimonas diminuta]	yahK	K13979	GO:0055114;GO:0000166;GO:0008270;GO:0016491	759	C	T	C	T	3	S
gi|489255970|ref|WP_003163915.1|	zinc-binding dehydrogenase [Brevundimonas diminuta]	yahK	K13979	GO:0055114;GO:0000166;GO:0008270;GO:0016491	780	C	A	C	A	3	S
gi|489255970|ref|WP_003163915.1|	zinc-binding dehydrogenase [Brevundimonas diminuta]	yahK	K13979	GO:0055114;GO:0000166;GO:0008270;GO:0016491	786	A	K	A	K	3	S
gi|489255970|ref|WP_003163915.1|	zinc-binding dehydrogenase [Brevundimonas diminuta]	yahK	K13979	GO:0055114;GO:0000166;GO:0008270;GO:0016491	801	A	E	A	E	3	S
gi|489255970|ref|WP_003163915.1|	zinc-binding dehydrogenase [Brevundimonas diminuta]	yahK	K13979	GO:0055114;GO:0000166;GO:0008270;GO:0016491	804	A	E	A	E	3	S
gi|489255970|ref|WP_003163915.1|	zinc-binding dehydrogenase [Brevundimonas diminuta]	yahK	K13979	GO:0055114;GO:0000166;GO:0008270;GO:0016491	810	C	A	C	A	3	S
gi|489255970|ref|WP_003163915.1|	zinc-binding dehydrogenase [Brevundimonas diminuta]	yahK	K13979	GO:0055114;GO:0000166;GO:0008270;GO:0016491	819	A	D	A	D	3	S
gi|489255970|ref|WP_003163915.1|	zinc-binding dehydrogenase [Brevundimonas diminuta]	yahK	K13979	GO:0055114;GO:0000166;GO:0008270;GO:0016491	825	C	T	C	T	3	S
gi|489255970|ref|WP_003163915.1|	zinc-binding dehydrogenase [Brevundimonas diminuta]	yahK	K13979	GO:0055114;GO:0000166;GO:0008270;GO:0016491	828	T	V	T	V	3	S
gi|489255970|ref|WP_003163915.1|	zinc-binding dehydrogenase [Brevundimonas diminuta]	yahK	K13979	GO:0055114;GO:0000166;GO:0008270;GO:0016491	831	C	S	C	S	3	S
gi|489255970|ref|WP_003163915.1|	zinc-binding dehydrogenase [Brevundimonas diminuta]	yahK	K13979	GO:0055114;GO:0000166;GO:0008270;GO:0016491	837	A	D	A	D	3	S
gi|489255970|ref|WP_003163915.1|	zinc-binding dehydrogenase [Brevundimonas diminuta]	yahK	K13979	GO:0055114;GO:0000166;GO:0008270;GO:0016491	852	T	L	T	L	3	S
gi|489255970|ref|WP_003163915.1|	zinc-binding dehydrogenase [Brevundimonas diminuta]	yahK	K13979	GO:0055114;GO:0000166;GO:0008270;GO:0016491	882	C	A	C	A	3	S
gi|489255970|ref|WP_003163915.1|	zinc-binding dehydrogenase [Brevundimonas diminuta]	yahK	K13979	GO:0055114;GO:0000166;GO:0008270;GO:0016491	954	G	G	G	G	3	S
gi|489255970|ref|WP_003163915.1|	zinc-binding dehydrogenase [Brevundimonas diminuta]	yahK	K13979	GO:0055114;GO:0000166;GO:0008270;GO:0016491	957	A	E	A	E	3	S
gi|489255970|ref|WP_003163915.1|	zinc-binding dehydrogenase [Brevundimonas diminuta]	yahK	K13979	GO:0055114;GO:0000166;GO:0008270;GO:0016491	960	C	T	C	T	3	S
gi|489255970|ref|WP_003163915.1|	zinc-binding dehydrogenase [Brevundimonas diminuta]	yahK	K13979	GO:0055114;GO:0000166;GO:0008270;GO:0016491	963	A	Q	A	Q	3	S
gi|489255970|ref|WP_003163915.1|	zinc-binding dehydrogenase [Brevundimonas diminuta]	yahK	K13979	GO:0055114;GO:0000166;GO:0008270;GO:0016491	966	A	E	A	E	3	S
gi|489255970|ref|WP_003163915.1|	zinc-binding dehydrogenase [Brevundimonas diminuta]	yahK	K13979	GO:0055114;GO:0000166;GO:0008270;GO:0016491	978	T	F	T	F	3	S
gi|489255970|ref|WP_003163915.1|	zinc-binding dehydrogenase [Brevundimonas diminuta]	yahK	K13979	GO:0055114;GO:0000166;GO:0008270;GO:0016491	984	A	K	A	K	3	S
gi|489255970|ref|WP_003163915.1|	zinc-binding dehydrogenase [Brevundimonas diminuta]	yahK	K13979	GO:0055114;GO:0000166;GO:0008270;GO:0016491	990	T	V	T	V	3	S
gi|489255970|ref|WP_003163915.1|	zinc-binding dehydrogenase [Brevundimonas diminuta]	yahK	K13979	GO:0055114;GO:0000166;GO:0008270;GO:0016491	1044	G	R	G	R	3	S
gi|489255970|ref|WP_003163915.1|	zinc-binding dehydrogenase [Brevundimonas diminuta]	yahK	K13979	GO:0055114;GO:0000166;GO:0008270;GO:0016491	1050	T	I	T	I	3	S
gi|397628044|gb|EJK68715.1|	hypothetical protein THAOC_10078 [Thalassiosira oceanica]	XRN1, SEP1, KEM1	K12618	GO:0016787	141	T	F	T	F	3	S
gi|223999915|ref|XP_002289630.1|	exportin1 [Thalassiosira pseudonana CCMP1335]	XPO1, CRM1	K14290	GO:0046907;GO:0006886;GO:0034613;GO:0005643;GO:0008565;GO:0044446;GO:0071702;GO:0043234	51	G	G	G	G	3	S
gi|223999915|ref|XP_002289630.1|	exportin1 [Thalassiosira pseudonana CCMP1335]	XPO1, CRM1	K14290	GO:0046907;GO:0006886;GO:0034613;GO:0005643;GO:0008565;GO:0044446;GO:0071702;GO:0043234	447	T	L	T	L	3	S
gi|223999915|ref|XP_002289630.1|	exportin1 [Thalassiosira pseudonana CCMP1335]	XPO1, CRM1	K14290	GO:0046907;GO:0006886;GO:0034613;GO:0005643;GO:0008565;GO:0044446;GO:0071702;GO:0043234	3027	T	V	T	V	3	S
gi|223999915|ref|XP_002289630.1|	exportin1 [Thalassiosira pseudonana CCMP1335]	XPO1, CRM1	K14290	GO:0046907;GO:0006886;GO:0034613;GO:0005643;GO:0008565;GO:0044446;GO:0071702;GO:0043234	3045	G	G	G	G	3	S
gi|223999915|ref|XP_002289630.1|	exportin1 [Thalassiosira pseudonana CCMP1335]	XPO1, CRM1	K14290	GO:0046907;GO:0006886;GO:0034613;GO:0005643;GO:0008565;GO:0044446;GO:0071702;GO:0043234	3066	A	D	A	D	3	S
gi|219118583|ref|XP_002180061.1|	xeroderma pigmentosum group A protein [Phaeodactylum tricornutum CCAP 1055/1]	XPA	K10847	GO:0097159;GO:1901363	387	T	I	T	I	3	S
gi|219123489|ref|XP_002182056.1|	predicted protein [Phaeodactylum tricornutum CCAP 1055/1]	WDR68, HAN11	K11805	_	339	T	F	T	F	3	S
gi|219123489|ref|XP_002182056.1|	predicted protein [Phaeodactylum tricornutum CCAP 1055/1]	WDR68, HAN11	K11805	_	738	G	R	G	R	3	S
gi|219123489|ref|XP_002182056.1|	predicted protein [Phaeodactylum tricornutum CCAP 1055/1]	WDR68, HAN11	K11805	_	1017	C	P	C	P	3	S
gi|219128017|ref|XP_002184220.1|	predicted protein [Phaeodactylum tricornutum CCAP 1055/1]	WASF2	K05748	_	111	T	F	T	F	3	S
gi|219128017|ref|XP_002184220.1|	predicted protein [Phaeodactylum tricornutum CCAP 1055/1]	WASF2	K05748	_	117	T	F	T	F	3	S
gi|219122957|ref|XP_002181802.1|	predicted protein [Phaeodactylum tricornutum CCAP 1055/1]	VTA1, LIP5	K12199	_	501	G	G	G	G	3	S
gi|219122957|ref|XP_002181802.1|	predicted protein [Phaeodactylum tricornutum CCAP 1055/1]	VTA1, LIP5	K12199	_	534	C	T	C	T	3	S
gi|219122957|ref|XP_002181802.1|	predicted protein [Phaeodactylum tricornutum CCAP 1055/1]	VTA1, LIP5	K12199	_	567	C	A	C	A	3	S
gi|219122957|ref|XP_002181802.1|	predicted protein [Phaeodactylum tricornutum CCAP 1055/1]	VTA1, LIP5	K12199	_	582	C	S	C	S	3	S
gi|219122957|ref|XP_002181802.1|	predicted protein [Phaeodactylum tricornutum CCAP 1055/1]	VTA1, LIP5	K12199	_	624	C	T	C	T	3	S
gi|219122957|ref|XP_002181802.1|	predicted protein [Phaeodactylum tricornutum CCAP 1055/1]	VTA1, LIP5	K12199	_	654	C	P	C	P	3	S
gi|219122957|ref|XP_002181802.1|	predicted protein [Phaeodactylum tricornutum CCAP 1055/1]	VTA1, LIP5	K12199	_	690	A	E	A	E	3	S
gi|219122957|ref|XP_002181802.1|	predicted protein [Phaeodactylum tricornutum CCAP 1055/1]	VTA1, LIP5	K12199	_	810	C	P	C	P	3	S
gi|219122957|ref|XP_002181802.1|	predicted protein [Phaeodactylum tricornutum CCAP 1055/1]	VTA1, LIP5	K12199	_	831	C	P	C	P	3	S
gi|219122957|ref|XP_002181802.1|	predicted protein [Phaeodactylum tricornutum CCAP 1055/1]	VTA1, LIP5	K12199	_	876	C	P	C	P	3	S
gi|219122957|ref|XP_002181802.1|	predicted protein [Phaeodactylum tricornutum CCAP 1055/1]	VTA1, LIP5	K12199	_	1029	C	A	C	A	3	S
gi|219122957|ref|XP_002181802.1|	predicted protein [Phaeodactylum tricornutum CCAP 1055/1]	VTA1, LIP5	K12199	_	1032	C	A	C	A	3	S
gi|219122957|ref|XP_002181802.1|	predicted protein [Phaeodactylum tricornutum CCAP 1055/1]	VTA1, LIP5	K12199	_	1050	C	A	C	A	3	S
gi|219129570|ref|XP_002184958.1|	vacuolar protein [Phaeodactylum tricornutum CCAP 1055/1]	VPS4	K12196	GO:0005737;GO:0005524;GO:0017111	114	T	I	T	I	3	S
gi|219129570|ref|XP_002184958.1|	vacuolar protein [Phaeodactylum tricornutum CCAP 1055/1]	VPS4	K12196	GO:0005737;GO:0005524;GO:0017111	159	C	A	C	A	3	S
gi|219129570|ref|XP_002184958.1|	vacuolar protein [Phaeodactylum tricornutum CCAP 1055/1]	VPS4	K12196	GO:0005737;GO:0005524;GO:0017111	165	A	E	A	E	3	S
gi|219129570|ref|XP_002184958.1|	vacuolar protein [Phaeodactylum tricornutum CCAP 1055/1]	VPS4	K12196	GO:0005737;GO:0005524;GO:0017111	381	T	V	T	V	3	S
gi|219129570|ref|XP_002184958.1|	vacuolar protein [Phaeodactylum tricornutum CCAP 1055/1]	VPS4	K12196	GO:0005737;GO:0005524;GO:0017111	495	G	G	G	G	3	S
gi|219129570|ref|XP_002184958.1|	vacuolar protein [Phaeodactylum tricornutum CCAP 1055/1]	VPS4	K12196	GO:0005737;GO:0005524;GO:0017111	540	C	T	C	T	3	S
gi|219129570|ref|XP_002184958.1|	vacuolar protein [Phaeodactylum tricornutum CCAP 1055/1]	VPS4	K12196	GO:0005737;GO:0005524;GO:0017111	582	C	A	C	A	3	S
gi|219129570|ref|XP_002184958.1|	vacuolar protein [Phaeodactylum tricornutum CCAP 1055/1]	VPS4	K12196	GO:0005737;GO:0005524;GO:0017111	588	A	E	A	E	3	S
gi|219129570|ref|XP_002184958.1|	vacuolar protein [Phaeodactylum tricornutum CCAP 1055/1]	VPS4	K12196	GO:0005737;GO:0005524;GO:0017111	615	T	L	T	L	3	S
gi|219129570|ref|XP_002184958.1|	vacuolar protein [Phaeodactylum tricornutum CCAP 1055/1]	VPS4	K12196	GO:0005737;GO:0005524;GO:0017111	672	T	I	T	I	3	S
gi|219129570|ref|XP_002184958.1|	vacuolar protein [Phaeodactylum tricornutum CCAP 1055/1]	VPS4	K12196	GO:0005737;GO:0005524;GO:0017111	681	C	P	C	P	3	S
gi|219129570|ref|XP_002184958.1|	vacuolar protein [Phaeodactylum tricornutum CCAP 1055/1]	VPS4	K12196	GO:0005737;GO:0005524;GO:0017111	684	A	N	A	N	3	S
gi|219129570|ref|XP_002184958.1|	vacuolar protein [Phaeodactylum tricornutum CCAP 1055/1]	VPS4	K12196	GO:0005737;GO:0005524;GO:0017111	702	G	G	G	G	3	S
gi|219129570|ref|XP_002184958.1|	vacuolar protein [Phaeodactylum tricornutum CCAP 1055/1]	VPS4	K12196	GO:0005737;GO:0005524;GO:0017111	711	C	A	C	A	3	S
gi|219129570|ref|XP_002184958.1|	vacuolar protein [Phaeodactylum tricornutum CCAP 1055/1]	VPS4	K12196	GO:0005737;GO:0005524;GO:0017111	726	A	E	A	E	3	S
gi|219129570|ref|XP_002184958.1|	vacuolar protein [Phaeodactylum tricornutum CCAP 1055/1]	VPS4	K12196	GO:0005737;GO:0005524;GO:0017111	729	T	V	T	V	3	S
gi|219129570|ref|XP_002184958.1|	vacuolar protein [Phaeodactylum tricornutum CCAP 1055/1]	VPS4	K12196	GO:0005737;GO:0005524;GO:0017111	741	T	F	T	F	3	S
gi|219129570|ref|XP_002184958.1|	vacuolar protein [Phaeodactylum tricornutum CCAP 1055/1]	VPS4	K12196	GO:0005737;GO:0005524;GO:0017111	744	C	P	C	P	3	S
gi|219129570|ref|XP_002184958.1|	vacuolar protein [Phaeodactylum tricornutum CCAP 1055/1]	VPS4	K12196	GO:0005737;GO:0005524;GO:0017111	750	T	F	T	F	3	S
gi|219129570|ref|XP_002184958.1|	vacuolar protein [Phaeodactylum tricornutum CCAP 1055/1]	VPS4	K12196	GO:0005737;GO:0005524;GO:0017111	756	G	G	G	G	3	S
gi|219129570|ref|XP_002184958.1|	vacuolar protein [Phaeodactylum tricornutum CCAP 1055/1]	VPS4	K12196	GO:0005737;GO:0005524;GO:0017111	765	C	P	C	P	3	S
gi|219129570|ref|XP_002184958.1|	vacuolar protein [Phaeodactylum tricornutum CCAP 1055/1]	VPS4	K12196	GO:0005737;GO:0005524;GO:0017111	783	G	G	G	G	3	S
gi|219129570|ref|XP_002184958.1|	vacuolar protein [Phaeodactylum tricornutum CCAP 1055/1]	VPS4	K12196	GO:0005737;GO:0005524;GO:0017111	789	C	P	C	P	3	S
gi|219129570|ref|XP_002184958.1|	vacuolar protein [Phaeodactylum tricornutum CCAP 1055/1]	VPS4	K12196	GO:0005737;GO:0005524;GO:0017111	792	G	G	G	G	3	S
gi|219129570|ref|XP_002184958.1|	vacuolar protein [Phaeodactylum tricornutum CCAP 1055/1]	VPS4	K12196	GO:0005737;GO:0005524;GO:0017111	795	G	G	G	G	3	S
gi|219129570|ref|XP_002184958.1|	vacuolar protein [Phaeodactylum tricornutum CCAP 1055/1]	VPS4	K12196	GO:0005737;GO:0005524;GO:0017111	798	A	K	A	K	3	S
gi|219129570|ref|XP_002184958.1|	vacuolar protein [Phaeodactylum tricornutum CCAP 1055/1]	VPS4	K12196	GO:0005737;GO:0005524;GO:0017111	804	C	A	C	A	3	S
gi|219129570|ref|XP_002184958.1|	vacuolar protein [Phaeodactylum tricornutum CCAP 1055/1]	VPS4	K12196	GO:0005737;GO:0005524;GO:0017111	810	T	V	T	V	3	S
gi|219129570|ref|XP_002184958.1|	vacuolar protein [Phaeodactylum tricornutum CCAP 1055/1]	VPS4	K12196	GO:0005737;GO:0005524;GO:0017111	816	C	T	C	T	3	S
gi|219129570|ref|XP_002184958.1|	vacuolar protein [Phaeodactylum tricornutum CCAP 1055/1]	VPS4	K12196	GO:0005737;GO:0005524;GO:0017111	822	C	T	C	T	3	S
gi|219129570|ref|XP_002184958.1|	vacuolar protein [Phaeodactylum tricornutum CCAP 1055/1]	VPS4	K12196	GO:0005737;GO:0005524;GO:0017111	834	C	S	C	S	3	S
gi|219129570|ref|XP_002184958.1|	vacuolar protein [Phaeodactylum tricornutum CCAP 1055/1]	VPS4	K12196	GO:0005737;GO:0005524;GO:0017111	837	A	K	A	K	3	S
gi|219129570|ref|XP_002184958.1|	vacuolar protein [Phaeodactylum tricornutum CCAP 1055/1]	VPS4	K12196	GO:0005737;GO:0005524;GO:0017111	843	G	G	G	G	3	S
gi|219129570|ref|XP_002184958.1|	vacuolar protein [Phaeodactylum tricornutum CCAP 1055/1]	VPS4	K12196	GO:0005737;GO:0005524;GO:0017111	849	A	E	A	E	3	S
gi|219129570|ref|XP_002184958.1|	vacuolar protein [Phaeodactylum tricornutum CCAP 1055/1]	VPS4	K12196	GO:0005737;GO:0005524;GO:0017111	867	T	F	T	F	3	S
gi|219129570|ref|XP_002184958.1|	vacuolar protein [Phaeodactylum tricornutum CCAP 1055/1]	VPS4	K12196	GO:0005737;GO:0005524;GO:0017111	873	C	A	C	A	3	S
gi|219129570|ref|XP_002184958.1|	vacuolar protein [Phaeodactylum tricornutum CCAP 1055/1]	VPS4	K12196	GO:0005737;GO:0005524;GO:0017111	876	G	R	G	R	3	S
gi|219129570|ref|XP_002184958.1|	vacuolar protein [Phaeodactylum tricornutum CCAP 1055/1]	VPS4	K12196	GO:0005737;GO:0005524;GO:0017111	996	A	K	A	K	3	S
gi|219129570|ref|XP_002184958.1|	vacuolar protein [Phaeodactylum tricornutum CCAP 1055/1]	VPS4	K12196	GO:0005737;GO:0005524;GO:0017111	1116	C	T	C	T	3	S
gi|219129570|ref|XP_002184958.1|	vacuolar protein [Phaeodactylum tricornutum CCAP 1055/1]	VPS4	K12196	GO:0005737;GO:0005524;GO:0017111	1140	T	I	T	I	3	S
gi|219129570|ref|XP_002184958.1|	vacuolar protein [Phaeodactylum tricornutum CCAP 1055/1]	VPS4	K12196	GO:0005737;GO:0005524;GO:0017111	1149	A	K	A	K	3	S
gi|219129570|ref|XP_002184958.1|	vacuolar protein [Phaeodactylum tricornutum CCAP 1055/1]	VPS4	K12196	GO:0005737;GO:0005524;GO:0017111	1197	G	R	G	R	3	S
gi|219129570|ref|XP_002184958.1|	vacuolar protein [Phaeodactylum tricornutum CCAP 1055/1]	VPS4	K12196	GO:0005737;GO:0005524;GO:0017111	1266	A	Q	A	Q	3	S
gi|219129570|ref|XP_002184958.1|	vacuolar protein [Phaeodactylum tricornutum CCAP 1055/1]	VPS4	K12196	GO:0005737;GO:0005524;GO:0017111	1272	C	T	C	T	3	S
gi|219115035|ref|XP_002178313.1|	predicted protein [Phaeodactylum tricornutum CCAP 1055/1]	VPS36, EAP45	K12190	GO:0005764;GO:0009987;GO:0005770;GO:0006810;GO:0043130	198	A	E	A	E	3	S
gi|219115035|ref|XP_002178313.1|	predicted protein [Phaeodactylum tricornutum CCAP 1055/1]	VPS36, EAP45	K12190	GO:0005764;GO:0009987;GO:0005770;GO:0006810;GO:0043130	201	A	D	A	D	3	S
gi|219115035|ref|XP_002178313.1|	predicted protein [Phaeodactylum tricornutum CCAP 1055/1]	VPS36, EAP45	K12190	GO:0005764;GO:0009987;GO:0005770;GO:0006810;GO:0043130	393	C	A	C	A	3	S
gi|219115035|ref|XP_002178313.1|	predicted protein [Phaeodactylum tricornutum CCAP 1055/1]	VPS36, EAP45	K12190	GO:0005764;GO:0009987;GO:0005770;GO:0006810;GO:0043130	405	C	S	C	S	3	S
gi|219115035|ref|XP_002178313.1|	predicted protein [Phaeodactylum tricornutum CCAP 1055/1]	VPS36, EAP45	K12190	GO:0005764;GO:0009987;GO:0005770;GO:0006810;GO:0043130	504	C	T	C	T	3	S
gi|219115035|ref|XP_002178313.1|	predicted protein [Phaeodactylum tricornutum CCAP 1055/1]	VPS36, EAP45	K12190	GO:0005764;GO:0009987;GO:0005770;GO:0006810;GO:0043130	609	G	G	G	G	3	S
gi|219115035|ref|XP_002178313.1|	predicted protein [Phaeodactylum tricornutum CCAP 1055/1]	VPS36, EAP45	K12190	GO:0005764;GO:0009987;GO:0005770;GO:0006810;GO:0043130	612	G	G	G	G	3	S
gi|219115035|ref|XP_002178313.1|	predicted protein [Phaeodactylum tricornutum CCAP 1055/1]	VPS36, EAP45	K12190	GO:0005764;GO:0009987;GO:0005770;GO:0006810;GO:0043130	639	T	I	T	I	3	S
gi|219115035|ref|XP_002178313.1|	predicted protein [Phaeodactylum tricornutum CCAP 1055/1]	VPS36, EAP45	K12190	GO:0005764;GO:0009987;GO:0005770;GO:0006810;GO:0043130	666	C	S	C	S	3	S
gi|219115035|ref|XP_002178313.1|	predicted protein [Phaeodactylum tricornutum CCAP 1055/1]	VPS36, EAP45	K12190	GO:0005764;GO:0009987;GO:0005770;GO:0006810;GO:0043130	687	A	K	A	K	3	S
gi|219115035|ref|XP_002178313.1|	predicted protein [Phaeodactylum tricornutum CCAP 1055/1]	VPS36, EAP45	K12190	GO:0005764;GO:0009987;GO:0005770;GO:0006810;GO:0043130	759	T	L	T	L	3	S
gi|219115035|ref|XP_002178313.1|	predicted protein [Phaeodactylum tricornutum CCAP 1055/1]	VPS36, EAP45	K12190	GO:0005764;GO:0009987;GO:0005770;GO:0006810;GO:0043130	762	T	I	T	I	3	S
gi|219115035|ref|XP_002178313.1|	predicted protein [Phaeodactylum tricornutum CCAP 1055/1]	VPS36, EAP45	K12190	GO:0005764;GO:0009987;GO:0005770;GO:0006810;GO:0043130	864	C	T	C	T	3	S
gi|219115035|ref|XP_002178313.1|	predicted protein [Phaeodactylum tricornutum CCAP 1055/1]	VPS36, EAP45	K12190	GO:0005764;GO:0009987;GO:0005770;GO:0006810;GO:0043130	879	G	C	G	C	3	S
gi|219115035|ref|XP_002178313.1|	predicted protein [Phaeodactylum tricornutum CCAP 1055/1]	VPS36, EAP45	K12190	GO:0005764;GO:0009987;GO:0005770;GO:0006810;GO:0043130	957	C	T	C	T	3	S
gi|219115035|ref|XP_002178313.1|	predicted protein [Phaeodactylum tricornutum CCAP 1055/1]	VPS36, EAP45	K12190	GO:0005764;GO:0009987;GO:0005770;GO:0006810;GO:0043130	981	C	S	C	S	3	S
gi|219115035|ref|XP_002178313.1|	predicted protein [Phaeodactylum tricornutum CCAP 1055/1]	VPS36, EAP45	K12190	GO:0005764;GO:0009987;GO:0005770;GO:0006810;GO:0043130	1014	A	D	A	D	3	S
gi|219115035|ref|XP_002178313.1|	predicted protein [Phaeodactylum tricornutum CCAP 1055/1]	VPS36, EAP45	K12190	GO:0005764;GO:0009987;GO:0005770;GO:0006810;GO:0043130	1059	G	R	G	R	3	S
gi|219115035|ref|XP_002178313.1|	predicted protein [Phaeodactylum tricornutum CCAP 1055/1]	VPS36, EAP45	K12190	GO:0005764;GO:0009987;GO:0005770;GO:0006810;GO:0043130	1068	C	S	C	S	3	S
gi|219115035|ref|XP_002178313.1|	predicted protein [Phaeodactylum tricornutum CCAP 1055/1]	VPS36, EAP45	K12190	GO:0005764;GO:0009987;GO:0005770;GO:0006810;GO:0043130	1143	C	S	C	S	3	S
gi|219121314|ref|XP_002185883.1|	predicted protein [Phaeodactylum tricornutum CCAP 1055/1]	VCP, CDC48	K13525	GO:0009846;GO:0016887;GO:0005654;GO:0042802;GO:0046686;GO:0022626;GO:0005524;GO:0005635;GO:0009860;GO:0009524;GO:0005730;GO:0017111;GO:0005819;GO:0008568;GO:0005886;GO:0005618;GO:0051301;GO:0045732;GO:0005794;GO:0006200	45	T	V	T	V	3	S
gi|219121314|ref|XP_002185883.1|	predicted protein [Phaeodactylum tricornutum CCAP 1055/1]	VCP, CDC48	K13525	GO:0009846;GO:0016887;GO:0005654;GO:0042802;GO:0046686;GO:0022626;GO:0005524;GO:0005635;GO:0009860;GO:0009524;GO:0005730;GO:0017111;GO:0005819;GO:0008568;GO:0005886;GO:0005618;GO:0051301;GO:0045732;GO:0005794;GO:0006200	51	G	G	G	G	3	S
gi|219121314|ref|XP_002185883.1|	predicted protein [Phaeodactylum tricornutum CCAP 1055/1]	VCP, CDC48	K13525	GO:0009846;GO:0016887;GO:0005654;GO:0042802;GO:0046686;GO:0022626;GO:0005524;GO:0005635;GO:0009860;GO:0009524;GO:0005730;GO:0017111;GO:0005819;GO:0008568;GO:0005886;GO:0005618;GO:0051301;GO:0045732;GO:0005794;GO:0006200	120	C	T	C	T	3	S
gi|219121314|ref|XP_002185883.1|	predicted protein [Phaeodactylum tricornutum CCAP 1055/1]	VCP, CDC48	K13525	GO:0009846;GO:0016887;GO:0005654;GO:0042802;GO:0046686;GO:0022626;GO:0005524;GO:0005635;GO:0009860;GO:0009524;GO:0005730;GO:0017111;GO:0005819;GO:0008568;GO:0005886;GO:0005618;GO:0051301;GO:0045732;GO:0005794;GO:0006200	150	A	E	A	E	3	S
gi|219121314|ref|XP_002185883.1|	predicted protein [Phaeodactylum tricornutum CCAP 1055/1]	VCP, CDC48	K13525	GO:0009846;GO:0016887;GO:0005654;GO:0042802;GO:0046686;GO:0022626;GO:0005524;GO:0005635;GO:0009860;GO:0009524;GO:0005730;GO:0017111;GO:0005819;GO:0008568;GO:0005886;GO:0005618;GO:0051301;GO:0045732;GO:0005794;GO:0006200	159	G	C	G	C	3	S
gi|219121314|ref|XP_002185883.1|	predicted protein [Phaeodactylum tricornutum CCAP 1055/1]	VCP, CDC48	K13525	GO:0009846;GO:0016887;GO:0005654;GO:0042802;GO:0046686;GO:0022626;GO:0005524;GO:0005635;GO:0009860;GO:0009524;GO:0005730;GO:0017111;GO:0005819;GO:0008568;GO:0005886;GO:0005618;GO:0051301;GO:0045732;GO:0005794;GO:0006200	183	G	R	G	R	3	S
gi|219121314|ref|XP_002185883.1|	predicted protein [Phaeodactylum tricornutum CCAP 1055/1]	VCP, CDC48	K13525	GO:0009846;GO:0016887;GO:0005654;GO:0042802;GO:0046686;GO:0022626;GO:0005524;GO:0005635;GO:0009860;GO:0009524;GO:0005730;GO:0017111;GO:0005819;GO:0008568;GO:0005886;GO:0005618;GO:0051301;GO:0045732;GO:0005794;GO:0006200	207	A	Q	A	Q	3	S
gi|219121314|ref|XP_002185883.1|	predicted protein [Phaeodactylum tricornutum CCAP 1055/1]	VCP, CDC48	K13525	GO:0009846;GO:0016887;GO:0005654;GO:0042802;GO:0046686;GO:0022626;GO:0005524;GO:0005635;GO:0009860;GO:0009524;GO:0005730;GO:0017111;GO:0005819;GO:0008568;GO:0005886;GO:0005618;GO:0051301;GO:0045732;GO:0005794;GO:0006200	249	G	C	G	C	3	S
gi|219121314|ref|XP_002185883.1|	predicted protein [Phaeodactylum tricornutum CCAP 1055/1]	VCP, CDC48	K13525	GO:0009846;GO:0016887;GO:0005654;GO:0042802;GO:0046686;GO:0022626;GO:0005524;GO:0005635;GO:0009860;GO:0009524;GO:0005730;GO:0017111;GO:0005819;GO:0008568;GO:0005886;GO:0005618;GO:0051301;GO:0045732;GO:0005794;GO:0006200	288	C	A	C	A	3	S
gi|219121314|ref|XP_002185883.1|	predicted protein [Phaeodactylum tricornutum CCAP 1055/1]	VCP, CDC48	K13525	GO:0009846;GO:0016887;GO:0005654;GO:0042802;GO:0046686;GO:0022626;GO:0005524;GO:0005635;GO:0009860;GO:0009524;GO:0005730;GO:0017111;GO:0005819;GO:0008568;GO:0005886;GO:0005618;GO:0051301;GO:0045732;GO:0005794;GO:0006200	339	C	P	C	P	3	S
gi|219121314|ref|XP_002185883.1|	predicted protein [Phaeodactylum tricornutum CCAP 1055/1]	VCP, CDC48	K13525	GO:0009846;GO:0016887;GO:0005654;GO:0042802;GO:0046686;GO:0022626;GO:0005524;GO:0005635;GO:0009860;GO:0009524;GO:0005730;GO:0017111;GO:0005819;GO:0008568;GO:0005886;GO:0005618;GO:0051301;GO:0045732;GO:0005794;GO:0006200	366	A	Q	A	Q	3	S
gi|219121314|ref|XP_002185883.1|	predicted protein [Phaeodactylum tricornutum CCAP 1055/1]	VCP, CDC48	K13525	GO:0009846;GO:0016887;GO:0005654;GO:0042802;GO:0046686;GO:0022626;GO:0005524;GO:0005635;GO:0009860;GO:0009524;GO:0005730;GO:0017111;GO:0005819;GO:0008568;GO:0005886;GO:0005618;GO:0051301;GO:0045732;GO:0005794;GO:0006200	447	A	K	A	K	3	S
gi|219121314|ref|XP_002185883.1|	predicted protein [Phaeodactylum tricornutum CCAP 1055/1]	VCP, CDC48	K13525	GO:0009846;GO:0016887;GO:0005654;GO:0042802;GO:0046686;GO:0022626;GO:0005524;GO:0005635;GO:0009860;GO:0009524;GO:0005730;GO:0017111;GO:0005819;GO:0008568;GO:0005886;GO:0005618;GO:0051301;GO:0045732;GO:0005794;GO:0006200	453	T	V	T	V	3	S
gi|219121314|ref|XP_002185883.1|	predicted protein [Phaeodactylum tricornutum CCAP 1055/1]	VCP, CDC48	K13525	GO:0009846;GO:0016887;GO:0005654;GO:0042802;GO:0046686;GO:0022626;GO:0005524;GO:0005635;GO:0009860;GO:0009524;GO:0005730;GO:0017111;GO:0005819;GO:0008568;GO:0005886;GO:0005618;GO:0051301;GO:0045732;GO:0005794;GO:0006200	465	C	A	C	A	3	S
gi|219121314|ref|XP_002185883.1|	predicted protein [Phaeodactylum tricornutum CCAP 1055/1]	VCP, CDC48	K13525	GO:0009846;GO:0016887;GO:0005654;GO:0042802;GO:0046686;GO:0022626;GO:0005524;GO:0005635;GO:0009860;GO:0009524;GO:0005730;GO:0017111;GO:0005819;GO:0008568;GO:0005886;GO:0005618;GO:0051301;GO:0045732;GO:0005794;GO:0006200	480	T	I	T	I	3	S
gi|219121314|ref|XP_002185883.1|	predicted protein [Phaeodactylum tricornutum CCAP 1055/1]	VCP, CDC48	K13525	GO:0009846;GO:0016887;GO:0005654;GO:0042802;GO:0046686;GO:0022626;GO:0005524;GO:0005635;GO:0009860;GO:0009524;GO:0005730;GO:0017111;GO:0005819;GO:0008568;GO:0005886;GO:0005618;GO:0051301;GO:0045732;GO:0005794;GO:0006200	513	C	A	C	A	3	S
gi|219121314|ref|XP_002185883.1|	predicted protein [Phaeodactylum tricornutum CCAP 1055/1]	VCP, CDC48	K13525	GO:0009846;GO:0016887;GO:0005654;GO:0042802;GO:0046686;GO:0022626;GO:0005524;GO:0005635;GO:0009860;GO:0009524;GO:0005730;GO:0017111;GO:0005819;GO:0008568;GO:0005886;GO:0005618;GO:0051301;GO:0045732;GO:0005794;GO:0006200	615	G	R	G	R	3	S
gi|219121314|ref|XP_002185883.1|	predicted protein [Phaeodactylum tricornutum CCAP 1055/1]	VCP, CDC48	K13525	GO:0009846;GO:0016887;GO:0005654;GO:0042802;GO:0046686;GO:0022626;GO:0005524;GO:0005635;GO:0009860;GO:0009524;GO:0005730;GO:0017111;GO:0005819;GO:0008568;GO:0005886;GO:0005618;GO:0051301;GO:0045732;GO:0005794;GO:0006200	669	A	*	A	*	3	S
gi|219121314|ref|XP_002185883.1|	predicted protein [Phaeodactylum tricornutum CCAP 1055/1]	VCP, CDC48	K13525	GO:0009846;GO:0016887;GO:0005654;GO:0042802;GO:0046686;GO:0022626;GO:0005524;GO:0005635;GO:0009860;GO:0009524;GO:0005730;GO:0017111;GO:0005819;GO:0008568;GO:0005886;GO:0005618;GO:0051301;GO:0045732;GO:0005794;GO:0006200	696	T	I	T	I	3	S
gi|219121314|ref|XP_002185883.1|	predicted protein [Phaeodactylum tricornutum CCAP 1055/1]	VCP, CDC48	K13525	GO:0009846;GO:0016887;GO:0005654;GO:0042802;GO:0046686;GO:0022626;GO:0005524;GO:0005635;GO:0009860;GO:0009524;GO:0005730;GO:0017111;GO:0005819;GO:0008568;GO:0005886;GO:0005618;GO:0051301;GO:0045732;GO:0005794;GO:0006200	855	G	C	G	C	3	S
gi|219121314|ref|XP_002185883.1|	predicted protein [Phaeodactylum tricornutum CCAP 1055/1]	VCP, CDC48	K13525	GO:0009846;GO:0016887;GO:0005654;GO:0042802;GO:0046686;GO:0022626;GO:0005524;GO:0005635;GO:0009860;GO:0009524;GO:0005730;GO:0017111;GO:0005819;GO:0008568;GO:0005886;GO:0005618;GO:0051301;GO:0045732;GO:0005794;GO:0006200	1086	C	T	C	T	3	S
gi|219121314|ref|XP_002185883.1|	predicted protein [Phaeodactylum tricornutum CCAP 1055/1]	VCP, CDC48	K13525	GO:0009846;GO:0016887;GO:0005654;GO:0042802;GO:0046686;GO:0022626;GO:0005524;GO:0005635;GO:0009860;GO:0009524;GO:0005730;GO:0017111;GO:0005819;GO:0008568;GO:0005886;GO:0005618;GO:0051301;GO:0045732;GO:0005794;GO:0006200	1182	C	P	C	P	3	S
gi|219121314|ref|XP_002185883.1|	predicted protein [Phaeodactylum tricornutum CCAP 1055/1]	VCP, CDC48	K13525	GO:0009846;GO:0016887;GO:0005654;GO:0042802;GO:0046686;GO:0022626;GO:0005524;GO:0005635;GO:0009860;GO:0009524;GO:0005730;GO:0017111;GO:0005819;GO:0008568;GO:0005886;GO:0005618;GO:0051301;GO:0045732;GO:0005794;GO:0006200	1188	A	K	A	K	3	S
gi|219121314|ref|XP_002185883.1|	predicted protein [Phaeodactylum tricornutum CCAP 1055/1]	VCP, CDC48	K13525	GO:0009846;GO:0016887;GO:0005654;GO:0042802;GO:0046686;GO:0022626;GO:0005524;GO:0005635;GO:0009860;GO:0009524;GO:0005730;GO:0017111;GO:0005819;GO:0008568;GO:0005886;GO:0005618;GO:0051301;GO:0045732;GO:0005794;GO:0006200	1197	C	A	C	A	3	S
gi|219121314|ref|XP_002185883.1|	predicted protein [Phaeodactylum tricornutum CCAP 1055/1]	VCP, CDC48	K13525	GO:0009846;GO:0016887;GO:0005654;GO:0042802;GO:0046686;GO:0022626;GO:0005524;GO:0005635;GO:0009860;GO:0009524;GO:0005730;GO:0017111;GO:0005819;GO:0008568;GO:0005886;GO:0005618;GO:0051301;GO:0045732;GO:0005794;GO:0006200	1212	T	F	T	F	3	S
gi|219121314|ref|XP_002185883.1|	predicted protein [Phaeodactylum tricornutum CCAP 1055/1]	VCP, CDC48	K13525	GO:0009846;GO:0016887;GO:0005654;GO:0042802;GO:0046686;GO:0022626;GO:0005524;GO:0005635;GO:0009860;GO:0009524;GO:0005730;GO:0017111;GO:0005819;GO:0008568;GO:0005886;GO:0005618;GO:0051301;GO:0045732;GO:0005794;GO:0006200	1278	A	N	A	N	3	S
gi|219121314|ref|XP_002185883.1|	predicted protein [Phaeodactylum tricornutum CCAP 1055/1]	VCP, CDC48	K13525	GO:0009846;GO:0016887;GO:0005654;GO:0042802;GO:0046686;GO:0022626;GO:0005524;GO:0005635;GO:0009860;GO:0009524;GO:0005730;GO:0017111;GO:0005819;GO:0008568;GO:0005886;GO:0005618;GO:0051301;GO:0045732;GO:0005794;GO:0006200	1434	T	L	T	L	3	S
gi|219121314|ref|XP_002185883.1|	predicted protein [Phaeodactylum tricornutum CCAP 1055/1]	VCP, CDC48	K13525	GO:0009846;GO:0016887;GO:0005654;GO:0042802;GO:0046686;GO:0022626;GO:0005524;GO:0005635;GO:0009860;GO:0009524;GO:0005730;GO:0017111;GO:0005819;GO:0008568;GO:0005886;GO:0005618;GO:0051301;GO:0045732;GO:0005794;GO:0006200	1527	C	P	C	P	3	S
gi|219121314|ref|XP_002185883.1|	predicted protein [Phaeodactylum tricornutum CCAP 1055/1]	VCP, CDC48	K13525	GO:0009846;GO:0016887;GO:0005654;GO:0042802;GO:0046686;GO:0022626;GO:0005524;GO:0005635;GO:0009860;GO:0009524;GO:0005730;GO:0017111;GO:0005819;GO:0008568;GO:0005886;GO:0005618;GO:0051301;GO:0045732;GO:0005794;GO:0006200	1542	A	K	A	K	3	S
gi|219121314|ref|XP_002185883.1|	predicted protein [Phaeodactylum tricornutum CCAP 1055/1]	VCP, CDC48	K13525	GO:0009846;GO:0016887;GO:0005654;GO:0042802;GO:0046686;GO:0022626;GO:0005524;GO:0005635;GO:0009860;GO:0009524;GO:0005730;GO:0017111;GO:0005819;GO:0008568;GO:0005886;GO:0005618;GO:0051301;GO:0045732;GO:0005794;GO:0006200	1608	C	P	C	P	3	S
gi|219121314|ref|XP_002185883.1|	predicted protein [Phaeodactylum tricornutum CCAP 1055/1]	VCP, CDC48	K13525	GO:0009846;GO:0016887;GO:0005654;GO:0042802;GO:0046686;GO:0022626;GO:0005524;GO:0005635;GO:0009860;GO:0009524;GO:0005730;GO:0017111;GO:0005819;GO:0008568;GO:0005886;GO:0005618;GO:0051301;GO:0045732;GO:0005794;GO:0006200	1620	T	I	T	I	3	S
gi|219121314|ref|XP_002185883.1|	predicted protein [Phaeodactylum tricornutum CCAP 1055/1]	VCP, CDC48	K13525	GO:0009846;GO:0016887;GO:0005654;GO:0042802;GO:0046686;GO:0022626;GO:0005524;GO:0005635;GO:0009860;GO:0009524;GO:0005730;GO:0017111;GO:0005819;GO:0008568;GO:0005886;GO:0005618;GO:0051301;GO:0045732;GO:0005794;GO:0006200	1755	T	V	T	V	3	S
gi|219121314|ref|XP_002185883.1|	predicted protein [Phaeodactylum tricornutum CCAP 1055/1]	VCP, CDC48	K13525	GO:0009846;GO:0016887;GO:0005654;GO:0042802;GO:0046686;GO:0022626;GO:0005524;GO:0005635;GO:0009860;GO:0009524;GO:0005730;GO:0017111;GO:0005819;GO:0008568;GO:0005886;GO:0005618;GO:0051301;GO:0045732;GO:0005794;GO:0006200	1818	C	P	C	P	3	S
gi|219121314|ref|XP_002185883.1|	predicted protein [Phaeodactylum tricornutum CCAP 1055/1]	VCP, CDC48	K13525	GO:0009846;GO:0016887;GO:0005654;GO:0042802;GO:0046686;GO:0022626;GO:0005524;GO:0005635;GO:0009860;GO:0009524;GO:0005730;GO:0017111;GO:0005819;GO:0008568;GO:0005886;GO:0005618;GO:0051301;GO:0045732;GO:0005794;GO:0006200	1833	T	V	T	V	3	S
gi|219121314|ref|XP_002185883.1|	predicted protein [Phaeodactylum tricornutum CCAP 1055/1]	VCP, CDC48	K13525	GO:0009846;GO:0016887;GO:0005654;GO:0042802;GO:0046686;GO:0022626;GO:0005524;GO:0005635;GO:0009860;GO:0009524;GO:0005730;GO:0017111;GO:0005819;GO:0008568;GO:0005886;GO:0005618;GO:0051301;GO:0045732;GO:0005794;GO:0006200	1842	C	A	C	A	3	S
gi|219121314|ref|XP_002185883.1|	predicted protein [Phaeodactylum tricornutum CCAP 1055/1]	VCP, CDC48	K13525	GO:0009846;GO:0016887;GO:0005654;GO:0042802;GO:0046686;GO:0022626;GO:0005524;GO:0005635;GO:0009860;GO:0009524;GO:0005730;GO:0017111;GO:0005819;GO:0008568;GO:0005886;GO:0005618;GO:0051301;GO:0045732;GO:0005794;GO:0006200	1848	A	K	A	K	3	S
gi|219121314|ref|XP_002185883.1|	predicted protein [Phaeodactylum tricornutum CCAP 1055/1]	VCP, CDC48	K13525	GO:0009846;GO:0016887;GO:0005654;GO:0042802;GO:0046686;GO:0022626;GO:0005524;GO:0005635;GO:0009860;GO:0009524;GO:0005730;GO:0017111;GO:0005819;GO:0008568;GO:0005886;GO:0005618;GO:0051301;GO:0045732;GO:0005794;GO:0006200	1887	T	V	T	V	3	S
gi|219121314|ref|XP_002185883.1|	predicted protein [Phaeodactylum tricornutum CCAP 1055/1]	VCP, CDC48	K13525	GO:0009846;GO:0016887;GO:0005654;GO:0042802;GO:0046686;GO:0022626;GO:0005524;GO:0005635;GO:0009860;GO:0009524;GO:0005730;GO:0017111;GO:0005819;GO:0008568;GO:0005886;GO:0005618;GO:0051301;GO:0045732;GO:0005794;GO:0006200	1968	A	N	A	N	3	S
gi|219121314|ref|XP_002185883.1|	predicted protein [Phaeodactylum tricornutum CCAP 1055/1]	VCP, CDC48	K13525	GO:0009846;GO:0016887;GO:0005654;GO:0042802;GO:0046686;GO:0022626;GO:0005524;GO:0005635;GO:0009860;GO:0009524;GO:0005730;GO:0017111;GO:0005819;GO:0008568;GO:0005886;GO:0005618;GO:0051301;GO:0045732;GO:0005794;GO:0006200	1992	C	T	C	T	3	S
gi|219121314|ref|XP_002185883.1|	predicted protein [Phaeodactylum tricornutum CCAP 1055/1]	VCP, CDC48	K13525	GO:0009846;GO:0016887;GO:0005654;GO:0042802;GO:0046686;GO:0022626;GO:0005524;GO:0005635;GO:0009860;GO:0009524;GO:0005730;GO:0017111;GO:0005819;GO:0008568;GO:0005886;GO:0005618;GO:0051301;GO:0045732;GO:0005794;GO:0006200	2025	A	K	A	K	3	S
gi|219121314|ref|XP_002185883.1|	predicted protein [Phaeodactylum tricornutum CCAP 1055/1]	VCP, CDC48	K13525	GO:0009846;GO:0016887;GO:0005654;GO:0042802;GO:0046686;GO:0022626;GO:0005524;GO:0005635;GO:0009860;GO:0009524;GO:0005730;GO:0017111;GO:0005819;GO:0008568;GO:0005886;GO:0005618;GO:0051301;GO:0045732;GO:0005794;GO:0006200	2187	C	P	C	P	3	S
gi|219121314|ref|XP_002185883.1|	predicted protein [Phaeodactylum tricornutum CCAP 1055/1]	VCP, CDC48	K13525	GO:0009846;GO:0016887;GO:0005654;GO:0042802;GO:0046686;GO:0022626;GO:0005524;GO:0005635;GO:0009860;GO:0009524;GO:0005730;GO:0017111;GO:0005819;GO:0008568;GO:0005886;GO:0005618;GO:0051301;GO:0045732;GO:0005794;GO:0006200	2247	A	N	A	N	3	S
gi|219121314|ref|XP_002185883.1|	predicted protein [Phaeodactylum tricornutum CCAP 1055/1]	VCP, CDC48	K13525	GO:0009846;GO:0016887;GO:0005654;GO:0042802;GO:0046686;GO:0022626;GO:0005524;GO:0005635;GO:0009860;GO:0009524;GO:0005730;GO:0017111;GO:0005819;GO:0008568;GO:0005886;GO:0005618;GO:0051301;GO:0045732;GO:0005794;GO:0006200	2250	G	G	G	G	3	S
gi|219122368|ref|XP_002181518.1|	predicted protein [Phaeodactylum tricornutum CCAP 1055/1]	VARS, valS	K01873	GO:0005737;GO:0009098;GO:0022008;GO:0004832;GO:0006418;GO:0004812;GO:0005524;GO:0002161;GO:0006450;GO:0009099;GO:0043231;GO:0006438;GO:0009097	39	A	Q	A	Q	3	S
gi|219122368|ref|XP_002181518.1|	predicted protein [Phaeodactylum tricornutum CCAP 1055/1]	VARS, valS	K01873	GO:0005737;GO:0009098;GO:0022008;GO:0004832;GO:0006418;GO:0004812;GO:0005524;GO:0002161;GO:0006450;GO:0009099;GO:0043231;GO:0006438;GO:0009097	849	A	K	A	K	3	S
gi|219122368|ref|XP_002181518.1|	predicted protein [Phaeodactylum tricornutum CCAP 1055/1]	VARS, valS	K01873	GO:0005737;GO:0009098;GO:0022008;GO:0004832;GO:0006418;GO:0004812;GO:0005524;GO:0002161;GO:0006450;GO:0009099;GO:0043231;GO:0006438;GO:0009097	903	G	G	G	G	3	S
gi|219122368|ref|XP_002181518.1|	predicted protein [Phaeodactylum tricornutum CCAP 1055/1]	VARS, valS	K01873	GO:0005737;GO:0009098;GO:0022008;GO:0004832;GO:0006418;GO:0004812;GO:0005524;GO:0002161;GO:0006450;GO:0009099;GO:0043231;GO:0006438;GO:0009097	906	A	K	A	K	3	S
gi|219122368|ref|XP_002181518.1|	predicted protein [Phaeodactylum tricornutum CCAP 1055/1]	VARS, valS	K01873	GO:0005737;GO:0009098;GO:0022008;GO:0004832;GO:0006418;GO:0004812;GO:0005524;GO:0002161;GO:0006450;GO:0009099;GO:0043231;GO:0006438;GO:0009097	909	A	K	A	K	3	S
gi|219122368|ref|XP_002181518.1|	predicted protein [Phaeodactylum tricornutum CCAP 1055/1]	VARS, valS	K01873	GO:0005737;GO:0009098;GO:0022008;GO:0004832;GO:0006418;GO:0004812;GO:0005524;GO:0002161;GO:0006450;GO:0009099;GO:0043231;GO:0006438;GO:0009097	921	A	Y	A	Y	3	S
gi|219122368|ref|XP_002181518.1|	predicted protein [Phaeodactylum tricornutum CCAP 1055/1]	VARS, valS	K01873	GO:0005737;GO:0009098;GO:0022008;GO:0004832;GO:0006418;GO:0004812;GO:0005524;GO:0002161;GO:0006450;GO:0009099;GO:0043231;GO:0006438;GO:0009097	924	C	P	C	P	3	S
gi|219122368|ref|XP_002181518.1|	predicted protein [Phaeodactylum tricornutum CCAP 1055/1]	VARS, valS	K01873	GO:0005737;GO:0009098;GO:0022008;GO:0004832;GO:0006418;GO:0004812;GO:0005524;GO:0002161;GO:0006450;GO:0009099;GO:0043231;GO:0006438;GO:0009097	927	A	K	A	K	3	S
gi|219122368|ref|XP_002181518.1|	predicted protein [Phaeodactylum tricornutum CCAP 1055/1]	VARS, valS	K01873	GO:0005737;GO:0009098;GO:0022008;GO:0004832;GO:0006418;GO:0004812;GO:0005524;GO:0002161;GO:0006450;GO:0009099;GO:0043231;GO:0006438;GO:0009097	930	T	V	T	V	3	S
gi|219122368|ref|XP_002181518.1|	predicted protein [Phaeodactylum tricornutum CCAP 1055/1]	VARS, valS	K01873	GO:0005737;GO:0009098;GO:0022008;GO:0004832;GO:0006418;GO:0004812;GO:0005524;GO:0002161;GO:0006450;GO:0009099;GO:0043231;GO:0006438;GO:0009097	933	A	E	A	E	3	S
gi|219122368|ref|XP_002181518.1|	predicted protein [Phaeodactylum tricornutum CCAP 1055/1]	VARS, valS	K01873	GO:0005737;GO:0009098;GO:0022008;GO:0004832;GO:0006418;GO:0004812;GO:0005524;GO:0002161;GO:0006450;GO:0009099;GO:0043231;GO:0006438;GO:0009097	936	C	A	C	A	3	S
gi|219122368|ref|XP_002181518.1|	predicted protein [Phaeodactylum tricornutum CCAP 1055/1]	VARS, valS	K01873	GO:0005737;GO:0009098;GO:0022008;GO:0004832;GO:0006418;GO:0004812;GO:0005524;GO:0002161;GO:0006450;GO:0009099;GO:0043231;GO:0006438;GO:0009097	939	C	A	C	A	3	S
gi|219122368|ref|XP_002181518.1|	predicted protein [Phaeodactylum tricornutum CCAP 1055/1]	VARS, valS	K01873	GO:0005737;GO:0009098;GO:0022008;GO:0004832;GO:0006418;GO:0004812;GO:0005524;GO:0002161;GO:0006450;GO:0009099;GO:0043231;GO:0006438;GO:0009097	945	A	Y	A	Y	3	S
gi|219122368|ref|XP_002181518.1|	predicted protein [Phaeodactylum tricornutum CCAP 1055/1]	VARS, valS	K01873	GO:0005737;GO:0009098;GO:0022008;GO:0004832;GO:0006418;GO:0004812;GO:0005524;GO:0002161;GO:0006450;GO:0009099;GO:0043231;GO:0006438;GO:0009097	948	A	E	A	E	3	S
gi|219122368|ref|XP_002181518.1|	predicted protein [Phaeodactylum tricornutum CCAP 1055/1]	VARS, valS	K01873	GO:0005737;GO:0009098;GO:0022008;GO:0004832;GO:0006418;GO:0004812;GO:0005524;GO:0002161;GO:0006450;GO:0009099;GO:0043231;GO:0006438;GO:0009097	960	G	G	G	G	3	S
gi|219122368|ref|XP_002181518.1|	predicted protein [Phaeodactylum tricornutum CCAP 1055/1]	VARS, valS	K01873	GO:0005737;GO:0009098;GO:0022008;GO:0004832;GO:0006418;GO:0004812;GO:0005524;GO:0002161;GO:0006450;GO:0009099;GO:0043231;GO:0006438;GO:0009097	966	T	F	T	F	3	S
gi|219122368|ref|XP_002181518.1|	predicted protein [Phaeodactylum tricornutum CCAP 1055/1]	VARS, valS	K01873	GO:0005737;GO:0009098;GO:0022008;GO:0004832;GO:0006418;GO:0004812;GO:0005524;GO:0002161;GO:0006450;GO:0009099;GO:0043231;GO:0006438;GO:0009097	969	A	K	A	K	3	S
gi|219122368|ref|XP_002181518.1|	predicted protein [Phaeodactylum tricornutum CCAP 1055/1]	VARS, valS	K01873	GO:0005737;GO:0009098;GO:0022008;GO:0004832;GO:0006418;GO:0004812;GO:0005524;GO:0002161;GO:0006450;GO:0009099;GO:0043231;GO:0006438;GO:0009097	972	A	D	A	D	3	S
gi|219122368|ref|XP_002181518.1|	predicted protein [Phaeodactylum tricornutum CCAP 1055/1]	VARS, valS	K01873	GO:0005737;GO:0009098;GO:0022008;GO:0004832;GO:0006418;GO:0004812;GO:0005524;GO:0002161;GO:0006450;GO:0009099;GO:0043231;GO:0006438;GO:0009097	984	T	V	T	V	3	S
gi|219122368|ref|XP_002181518.1|	predicted protein [Phaeodactylum tricornutum CCAP 1055/1]	VARS, valS	K01873	GO:0005737;GO:0009098;GO:0022008;GO:0004832;GO:0006418;GO:0004812;GO:0005524;GO:0002161;GO:0006450;GO:0009099;GO:0043231;GO:0006438;GO:0009097	993	C	P	C	P	3	S
gi|219122368|ref|XP_002181518.1|	predicted protein [Phaeodactylum tricornutum CCAP 1055/1]	VARS, valS	K01873	GO:0005737;GO:0009098;GO:0022008;GO:0004832;GO:0006418;GO:0004812;GO:0005524;GO:0002161;GO:0006450;GO:0009099;GO:0043231;GO:0006438;GO:0009097	996	C	P	C	P	3	S
gi|219122368|ref|XP_002181518.1|	predicted protein [Phaeodactylum tricornutum CCAP 1055/1]	VARS, valS	K01873	GO:0005737;GO:0009098;GO:0022008;GO:0004832;GO:0006418;GO:0004812;GO:0005524;GO:0002161;GO:0006450;GO:0009099;GO:0043231;GO:0006438;GO:0009097	999	C	P	C	P	3	S
gi|219122368|ref|XP_002181518.1|	predicted protein [Phaeodactylum tricornutum CCAP 1055/1]	VARS, valS	K01873	GO:0005737;GO:0009098;GO:0022008;GO:0004832;GO:0006418;GO:0004812;GO:0005524;GO:0002161;GO:0006450;GO:0009099;GO:0043231;GO:0006438;GO:0009097	1002	A	N	A	N	3	S
gi|219122368|ref|XP_002181518.1|	predicted protein [Phaeodactylum tricornutum CCAP 1055/1]	VARS, valS	K01873	GO:0005737;GO:0009098;GO:0022008;GO:0004832;GO:0006418;GO:0004812;GO:0005524;GO:0002161;GO:0006450;GO:0009099;GO:0043231;GO:0006438;GO:0009097	1005	T	V	T	V	3	S
gi|219122368|ref|XP_002181518.1|	predicted protein [Phaeodactylum tricornutum CCAP 1055/1]	VARS, valS	K01873	GO:0005737;GO:0009098;GO:0022008;GO:0004832;GO:0006418;GO:0004812;GO:0005524;GO:0002161;GO:0006450;GO:0009099;GO:0043231;GO:0006438;GO:0009097	1011	G	G	G	G	3	S
gi|219122368|ref|XP_002181518.1|	predicted protein [Phaeodactylum tricornutum CCAP 1055/1]	VARS, valS	K01873	GO:0005737;GO:0009098;GO:0022008;GO:0004832;GO:0006418;GO:0004812;GO:0005524;GO:0002161;GO:0006450;GO:0009099;GO:0043231;GO:0006438;GO:0009097	1017	A	H	A	H	3	S
gi|219122368|ref|XP_002181518.1|	predicted protein [Phaeodactylum tricornutum CCAP 1055/1]	VARS, valS	K01873	GO:0005737;GO:0009098;GO:0022008;GO:0004832;GO:0006418;GO:0004812;GO:0005524;GO:0002161;GO:0006450;GO:0009099;GO:0043231;GO:0006438;GO:0009097	1023	G	G	G	G	3	S
gi|219122368|ref|XP_002181518.1|	predicted protein [Phaeodactylum tricornutum CCAP 1055/1]	VARS, valS	K01873	GO:0005737;GO:0009098;GO:0022008;GO:0004832;GO:0006418;GO:0004812;GO:0005524;GO:0002161;GO:0006450;GO:0009099;GO:0043231;GO:0006438;GO:0009097	1026	A	H	A	H	3	S
gi|219122368|ref|XP_002181518.1|	predicted protein [Phaeodactylum tricornutum CCAP 1055/1]	VARS, valS	K01873	GO:0005737;GO:0009098;GO:0022008;GO:0004832;GO:0006418;GO:0004812;GO:0005524;GO:0002161;GO:0006450;GO:0009099;GO:0043231;GO:0006438;GO:0009097	1032	C	T	C	T	3	S
gi|219122368|ref|XP_002181518.1|	predicted protein [Phaeodactylum tricornutum CCAP 1055/1]	VARS, valS	K01873	GO:0005737;GO:0009098;GO:0022008;GO:0004832;GO:0006418;GO:0004812;GO:0005524;GO:0002161;GO:0006450;GO:0009099;GO:0043231;GO:0006438;GO:0009097	1035	A	E	A	E	3	S
gi|219122368|ref|XP_002181518.1|	predicted protein [Phaeodactylum tricornutum CCAP 1055/1]	VARS, valS	K01873	GO:0005737;GO:0009098;GO:0022008;GO:0004832;GO:0006418;GO:0004812;GO:0005524;GO:0002161;GO:0006450;GO:0009099;GO:0043231;GO:0006438;GO:0009097	1038	A	D	A	D	3	S
gi|219122368|ref|XP_002181518.1|	predicted protein [Phaeodactylum tricornutum CCAP 1055/1]	VARS, valS	K01873	GO:0005737;GO:0009098;GO:0022008;GO:0004832;GO:0006418;GO:0004812;GO:0005524;GO:0002161;GO:0006450;GO:0009099;GO:0043231;GO:0006438;GO:0009097	1044	G	R	G	R	3	S
gi|219122368|ref|XP_002181518.1|	predicted protein [Phaeodactylum tricornutum CCAP 1055/1]	VARS, valS	K01873	GO:0005737;GO:0009098;GO:0022008;GO:0004832;GO:0006418;GO:0004812;GO:0005524;GO:0002161;GO:0006450;GO:0009099;GO:0043231;GO:0006438;GO:0009097	1047	G	R	G	R	3	S
gi|219122368|ref|XP_002181518.1|	predicted protein [Phaeodactylum tricornutum CCAP 1055/1]	VARS, valS	K01873	GO:0005737;GO:0009098;GO:0022008;GO:0004832;GO:0006418;GO:0004812;GO:0005524;GO:0002161;GO:0006450;GO:0009099;GO:0043231;GO:0006438;GO:0009097	1053	G	G	G	G	3	S
gi|219122368|ref|XP_002181518.1|	predicted protein [Phaeodactylum tricornutum CCAP 1055/1]	VARS, valS	K01873	GO:0005737;GO:0009098;GO:0022008;GO:0004832;GO:0006418;GO:0004812;GO:0005524;GO:0002161;GO:0006450;GO:0009099;GO:0043231;GO:0006438;GO:0009097	1056	A	N	A	N	3	S
gi|219122368|ref|XP_002181518.1|	predicted protein [Phaeodactylum tricornutum CCAP 1055/1]	VARS, valS	K01873	GO:0005737;GO:0009098;GO:0022008;GO:0004832;GO:0006418;GO:0004812;GO:0005524;GO:0002161;GO:0006450;GO:0009099;GO:0043231;GO:0006438;GO:0009097	1065	G	G	G	G	3	S
gi|219122368|ref|XP_002181518.1|	predicted protein [Phaeodactylum tricornutum CCAP 1055/1]	VARS, valS	K01873	GO:0005737;GO:0009098;GO:0022008;GO:0004832;GO:0006418;GO:0004812;GO:0005524;GO:0002161;GO:0006450;GO:0009099;GO:0043231;GO:0006438;GO:0009097	1068	A	D	A	D	3	S
gi|219122368|ref|XP_002181518.1|	predicted protein [Phaeodactylum tricornutum CCAP 1055/1]	VARS, valS	K01873	GO:0005737;GO:0009098;GO:0022008;GO:0004832;GO:0006418;GO:0004812;GO:0005524;GO:0002161;GO:0006450;GO:0009099;GO:0043231;GO:0006438;GO:0009097	1071	A	H	A	H	3	S
gi|219122368|ref|XP_002181518.1|	predicted protein [Phaeodactylum tricornutum CCAP 1055/1]	VARS, valS	K01873	GO:0005737;GO:0009098;GO:0022008;GO:0004832;GO:0006418;GO:0004812;GO:0005524;GO:0002161;GO:0006450;GO:0009099;GO:0043231;GO:0006438;GO:0009097	1074	C	A	C	A	3	S
gi|219122368|ref|XP_002181518.1|	predicted protein [Phaeodactylum tricornutum CCAP 1055/1]	VARS, valS	K01873	GO:0005737;GO:0009098;GO:0022008;GO:0004832;GO:0006418;GO:0004812;GO:0005524;GO:0002161;GO:0006450;GO:0009099;GO:0043231;GO:0006438;GO:0009097	1077	G	G	G	G	3	S
gi|219122368|ref|XP_002181518.1|	predicted protein [Phaeodactylum tricornutum CCAP 1055/1]	VARS, valS	K01873	GO:0005737;GO:0009098;GO:0022008;GO:0004832;GO:0006418;GO:0004812;GO:0005524;GO:0002161;GO:0006450;GO:0009099;GO:0043231;GO:0006438;GO:0009097	1083	C	A	C	A	3	S
gi|219122368|ref|XP_002181518.1|	predicted protein [Phaeodactylum tricornutum CCAP 1055/1]	VARS, valS	K01873	GO:0005737;GO:0009098;GO:0022008;GO:0004832;GO:0006418;GO:0004812;GO:0005524;GO:0002161;GO:0006450;GO:0009099;GO:0043231;GO:0006438;GO:0009097	1086	C	T	C	T	3	S
gi|219122368|ref|XP_002181518.1|	predicted protein [Phaeodactylum tricornutum CCAP 1055/1]	VARS, valS	K01873	GO:0005737;GO:0009098;GO:0022008;GO:0004832;GO:0006418;GO:0004812;GO:0005524;GO:0002161;GO:0006450;GO:0009099;GO:0043231;GO:0006438;GO:0009097	1089	A	Q	A	Q	3	S
gi|219122368|ref|XP_002181518.1|	predicted protein [Phaeodactylum tricornutum CCAP 1055/1]	VARS, valS	K01873	GO:0005737;GO:0009098;GO:0022008;GO:0004832;GO:0006418;GO:0004812;GO:0005524;GO:0002161;GO:0006450;GO:0009099;GO:0043231;GO:0006438;GO:0009097	1092	T	V	T	V	3	S
gi|219122368|ref|XP_002181518.1|	predicted protein [Phaeodactylum tricornutum CCAP 1055/1]	VARS, valS	K01873	GO:0005737;GO:0009098;GO:0022008;GO:0004832;GO:0006418;GO:0004812;GO:0005524;GO:0002161;GO:0006450;GO:0009099;GO:0043231;GO:0006438;GO:0009097	1095	T	V	T	V	3	S
gi|219122368|ref|XP_002181518.1|	predicted protein [Phaeodactylum tricornutum CCAP 1055/1]	VARS, valS	K01873	GO:0005737;GO:0009098;GO:0022008;GO:0004832;GO:0006418;GO:0004812;GO:0005524;GO:0002161;GO:0006450;GO:0009099;GO:0043231;GO:0006438;GO:0009097	1098	A	E	A	E	3	S
gi|219122368|ref|XP_002181518.1|	predicted protein [Phaeodactylum tricornutum CCAP 1055/1]	VARS, valS	K01873	GO:0005737;GO:0009098;GO:0022008;GO:0004832;GO:0006418;GO:0004812;GO:0005524;GO:0002161;GO:0006450;GO:0009099;GO:0043231;GO:0006438;GO:0009097	1101	A	K	A	K	3	S
gi|219122368|ref|XP_002181518.1|	predicted protein [Phaeodactylum tricornutum CCAP 1055/1]	VARS, valS	K01873	GO:0005737;GO:0009098;GO:0022008;GO:0004832;GO:0006418;GO:0004812;GO:0005524;GO:0002161;GO:0006450;GO:0009099;GO:0043231;GO:0006438;GO:0009097	1113	G	G	G	G	3	S
gi|219122368|ref|XP_002181518.1|	predicted protein [Phaeodactylum tricornutum CCAP 1055/1]	VARS, valS	K01873	GO:0005737;GO:0009098;GO:0022008;GO:0004832;GO:0006418;GO:0004812;GO:0005524;GO:0002161;GO:0006450;GO:0009099;GO:0043231;GO:0006438;GO:0009097	1116	A	K	A	K	3	S
gi|219122368|ref|XP_002181518.1|	predicted protein [Phaeodactylum tricornutum CCAP 1055/1]	VARS, valS	K01873	GO:0005737;GO:0009098;GO:0022008;GO:0004832;GO:0006418;GO:0004812;GO:0005524;GO:0002161;GO:0006450;GO:0009099;GO:0043231;GO:0006438;GO:0009097	1119	C	T	C	T	3	S
gi|219122368|ref|XP_002181518.1|	predicted protein [Phaeodactylum tricornutum CCAP 1055/1]	VARS, valS	K01873	GO:0005737;GO:0009098;GO:0022008;GO:0004832;GO:0006418;GO:0004812;GO:0005524;GO:0002161;GO:0006450;GO:0009099;GO:0043231;GO:0006438;GO:0009097	1125	A	D	A	D	3	S
gi|219122368|ref|XP_002181518.1|	predicted protein [Phaeodactylum tricornutum CCAP 1055/1]	VARS, valS	K01873	GO:0005737;GO:0009098;GO:0022008;GO:0004832;GO:0006418;GO:0004812;GO:0005524;GO:0002161;GO:0006450;GO:0009099;GO:0043231;GO:0006438;GO:0009097	1131	G	G	G	G	3	S
gi|219122368|ref|XP_002181518.1|	predicted protein [Phaeodactylum tricornutum CCAP 1055/1]	VARS, valS	K01873	GO:0005737;GO:0009098;GO:0022008;GO:0004832;GO:0006418;GO:0004812;GO:0005524;GO:0002161;GO:0006450;GO:0009099;GO:0043231;GO:0006438;GO:0009097	1134	G	R	G	R	3	S
gi|219122368|ref|XP_002181518.1|	predicted protein [Phaeodactylum tricornutum CCAP 1055/1]	VARS, valS	K01873	GO:0005737;GO:0009098;GO:0022008;GO:0004832;GO:0006418;GO:0004812;GO:0005524;GO:0002161;GO:0006450;GO:0009099;GO:0043231;GO:0006438;GO:0009097	1140	T	F	T	F	3	S
gi|219122368|ref|XP_002181518.1|	predicted protein [Phaeodactylum tricornutum CCAP 1055/1]	VARS, valS	K01873	GO:0005737;GO:0009098;GO:0022008;GO:0004832;GO:0006418;GO:0004812;GO:0005524;GO:0002161;GO:0006450;GO:0009099;GO:0043231;GO:0006438;GO:0009097	1146	T	V	T	V	3	S
gi|219122368|ref|XP_002181518.1|	predicted protein [Phaeodactylum tricornutum CCAP 1055/1]	VARS, valS	K01873	GO:0005737;GO:0009098;GO:0022008;GO:0004832;GO:0006418;GO:0004812;GO:0005524;GO:0002161;GO:0006450;GO:0009099;GO:0043231;GO:0006438;GO:0009097	1155	A	Y	A	Y	3	S
gi|219122368|ref|XP_002181518.1|	predicted protein [Phaeodactylum tricornutum CCAP 1055/1]	VARS, valS	K01873	GO:0005737;GO:0009098;GO:0022008;GO:0004832;GO:0006418;GO:0004812;GO:0005524;GO:0002161;GO:0006450;GO:0009099;GO:0043231;GO:0006438;GO:0009097	1158	G	G	G	G	3	S
gi|219122368|ref|XP_002181518.1|	predicted protein [Phaeodactylum tricornutum CCAP 1055/1]	VARS, valS	K01873	GO:0005737;GO:0009098;GO:0022008;GO:0004832;GO:0006418;GO:0004812;GO:0005524;GO:0002161;GO:0006450;GO:0009099;GO:0043231;GO:0006438;GO:0009097	1161	G	R	G	R	3	S
gi|219122368|ref|XP_002181518.1|	predicted protein [Phaeodactylum tricornutum CCAP 1055/1]	VARS, valS	K01873	GO:0005737;GO:0009098;GO:0022008;GO:0004832;GO:0006418;GO:0004812;GO:0005524;GO:0002161;GO:0006450;GO:0009099;GO:0043231;GO:0006438;GO:0009097	1164	T	I	T	I	3	S
gi|219122368|ref|XP_002181518.1|	predicted protein [Phaeodactylum tricornutum CCAP 1055/1]	VARS, valS	K01873	GO:0005737;GO:0009098;GO:0022008;GO:0004832;GO:0006418;GO:0004812;GO:0005524;GO:0002161;GO:0006450;GO:0009099;GO:0043231;GO:0006438;GO:0009097	1170	A	Q	A	Q	3	S
gi|219122368|ref|XP_002181518.1|	predicted protein [Phaeodactylum tricornutum CCAP 1055/1]	VARS, valS	K01873	GO:0005737;GO:0009098;GO:0022008;GO:0004832;GO:0006418;GO:0004812;GO:0005524;GO:0002161;GO:0006450;GO:0009099;GO:0043231;GO:0006438;GO:0009097	1176	G	G	G	G	3	S
gi|219122368|ref|XP_002181518.1|	predicted protein [Phaeodactylum tricornutum CCAP 1055/1]	VARS, valS	K01873	GO:0005737;GO:0009098;GO:0022008;GO:0004832;GO:0006418;GO:0004812;GO:0005524;GO:0002161;GO:0006450;GO:0009099;GO:0043231;GO:0006438;GO:0009097	1182	C	S	C	S	3	S
gi|219122368|ref|XP_002181518.1|	predicted protein [Phaeodactylum tricornutum CCAP 1055/1]	VARS, valS	K01873	GO:0005737;GO:0009098;GO:0022008;GO:0004832;GO:0006418;GO:0004812;GO:0005524;GO:0002161;GO:0006450;GO:0009099;GO:0043231;GO:0006438;GO:0009097	1188	A	D	A	D	3	S
gi|219122368|ref|XP_002181518.1|	predicted protein [Phaeodactylum tricornutum CCAP 1055/1]	VARS, valS	K01873	GO:0005737;GO:0009098;GO:0022008;GO:0004832;GO:0006418;GO:0004812;GO:0005524;GO:0002161;GO:0006450;GO:0009099;GO:0043231;GO:0006438;GO:0009097	1194	A	Q	A	Q	3	S
gi|219122368|ref|XP_002181518.1|	predicted protein [Phaeodactylum tricornutum CCAP 1055/1]	VARS, valS	K01873	GO:0005737;GO:0009098;GO:0022008;GO:0004832;GO:0006418;GO:0004812;GO:0005524;GO:0002161;GO:0006450;GO:0009099;GO:0043231;GO:0006438;GO:0009097	1197	T	F	T	F	3	S
gi|219122368|ref|XP_002181518.1|	predicted protein [Phaeodactylum tricornutum CCAP 1055/1]	VARS, valS	K01873	GO:0005737;GO:0009098;GO:0022008;GO:0004832;GO:0006418;GO:0004812;GO:0005524;GO:0002161;GO:0006450;GO:0009099;GO:0043231;GO:0006438;GO:0009097	1200	C	T	C	T	3	S
gi|219122368|ref|XP_002181518.1|	predicted protein [Phaeodactylum tricornutum CCAP 1055/1]	VARS, valS	K01873	GO:0005737;GO:0009098;GO:0022008;GO:0004832;GO:0006418;GO:0004812;GO:0005524;GO:0002161;GO:0006450;GO:0009099;GO:0043231;GO:0006438;GO:0009097	1206	A	D	A	D	3	S
gi|219122368|ref|XP_002181518.1|	predicted protein [Phaeodactylum tricornutum CCAP 1055/1]	VARS, valS	K01873	GO:0005737;GO:0009098;GO:0022008;GO:0004832;GO:0006418;GO:0004812;GO:0005524;GO:0002161;GO:0006450;GO:0009099;GO:0043231;GO:0006438;GO:0009097	1209	A	D	A	D	3	S
gi|219122368|ref|XP_002181518.1|	predicted protein [Phaeodactylum tricornutum CCAP 1055/1]	VARS, valS	K01873	GO:0005737;GO:0009098;GO:0022008;GO:0004832;GO:0006418;GO:0004812;GO:0005524;GO:0002161;GO:0006450;GO:0009099;GO:0043231;GO:0006438;GO:0009097	1218	G	S	G	S	3	S
gi|219122368|ref|XP_002181518.1|	predicted protein [Phaeodactylum tricornutum CCAP 1055/1]	VARS, valS	K01873	GO:0005737;GO:0009098;GO:0022008;GO:0004832;GO:0006418;GO:0004812;GO:0005524;GO:0002161;GO:0006450;GO:0009099;GO:0043231;GO:0006438;GO:0009097	1221	C	A	C	A	3	S
gi|219122368|ref|XP_002181518.1|	predicted protein [Phaeodactylum tricornutum CCAP 1055/1]	VARS, valS	K01873	GO:0005737;GO:0009098;GO:0022008;GO:0004832;GO:0006418;GO:0004812;GO:0005524;GO:0002161;GO:0006450;GO:0009099;GO:0043231;GO:0006438;GO:0009097	1224	T	V	T	V	3	S
gi|219122368|ref|XP_002181518.1|	predicted protein [Phaeodactylum tricornutum CCAP 1055/1]	VARS, valS	K01873	GO:0005737;GO:0009098;GO:0022008;GO:0004832;GO:0006418;GO:0004812;GO:0005524;GO:0002161;GO:0006450;GO:0009099;GO:0043231;GO:0006438;GO:0009097	1227	A	E	A	E	3	S
gi|219122368|ref|XP_002181518.1|	predicted protein [Phaeodactylum tricornutum CCAP 1055/1]	VARS, valS	K01873	GO:0005737;GO:0009098;GO:0022008;GO:0004832;GO:0006418;GO:0004812;GO:0005524;GO:0002161;GO:0006450;GO:0009099;GO:0043231;GO:0006438;GO:0009097	1230	C	A	C	A	3	S
gi|219122368|ref|XP_002181518.1|	predicted protein [Phaeodactylum tricornutum CCAP 1055/1]	VARS, valS	K01873	GO:0005737;GO:0009098;GO:0022008;GO:0004832;GO:0006418;GO:0004812;GO:0005524;GO:0002161;GO:0006450;GO:0009099;GO:0043231;GO:0006438;GO:0009097	1236	G	R	G	R	3	S
gi|219122368|ref|XP_002181518.1|	predicted protein [Phaeodactylum tricornutum CCAP 1055/1]	VARS, valS	K01873	GO:0005737;GO:0009098;GO:0022008;GO:0004832;GO:0006418;GO:0004812;GO:0005524;GO:0002161;GO:0006450;GO:0009099;GO:0043231;GO:0006438;GO:0009097	1248	G	G	G	G	3	S
gi|219122368|ref|XP_002181518.1|	predicted protein [Phaeodactylum tricornutum CCAP 1055/1]	VARS, valS	K01873	GO:0005737;GO:0009098;GO:0022008;GO:0004832;GO:0006418;GO:0004812;GO:0005524;GO:0002161;GO:0006450;GO:0009099;GO:0043231;GO:0006438;GO:0009097	1251	T	I	T	I	3	S
gi|219122368|ref|XP_002181518.1|	predicted protein [Phaeodactylum tricornutum CCAP 1055/1]	VARS, valS	K01873	GO:0005737;GO:0009098;GO:0022008;GO:0004832;GO:0006418;GO:0004812;GO:0005524;GO:0002161;GO:0006450;GO:0009099;GO:0043231;GO:0006438;GO:0009097	1260	G	R	G	R	3	S
gi|219122368|ref|XP_002181518.1|	predicted protein [Phaeodactylum tricornutum CCAP 1055/1]	VARS, valS	K01873	GO:0005737;GO:0009098;GO:0022008;GO:0004832;GO:0006418;GO:0004812;GO:0005524;GO:0002161;GO:0006450;GO:0009099;GO:0043231;GO:0006438;GO:0009097	1266	T	V	T	V	3	S
gi|219122368|ref|XP_002181518.1|	predicted protein [Phaeodactylum tricornutum CCAP 1055/1]	VARS, valS	K01873	GO:0005737;GO:0009098;GO:0022008;GO:0004832;GO:0006418;GO:0004812;GO:0005524;GO:0002161;GO:0006450;GO:0009099;GO:0043231;GO:0006438;GO:0009097	1269	A	N	A	N	3	S
gi|219122368|ref|XP_002181518.1|	predicted protein [Phaeodactylum tricornutum CCAP 1055/1]	VARS, valS	K01873	GO:0005737;GO:0009098;GO:0022008;GO:0004832;GO:0006418;GO:0004812;GO:0005524;GO:0002161;GO:0006450;GO:0009099;GO:0043231;GO:0006438;GO:0009097	1275	G	C	G	C	3	S
gi|219122368|ref|XP_002181518.1|	predicted protein [Phaeodactylum tricornutum CCAP 1055/1]	VARS, valS	K01873	GO:0005737;GO:0009098;GO:0022008;GO:0004832;GO:0006418;GO:0004812;GO:0005524;GO:0002161;GO:0006450;GO:0009099;GO:0043231;GO:0006438;GO:0009097	1281	C	T	C	T	3	S
gi|219122368|ref|XP_002181518.1|	predicted protein [Phaeodactylum tricornutum CCAP 1055/1]	VARS, valS	K01873	GO:0005737;GO:0009098;GO:0022008;GO:0004832;GO:0006418;GO:0004812;GO:0005524;GO:0002161;GO:0006450;GO:0009099;GO:0043231;GO:0006438;GO:0009097	1284	C	A	C	A	3	S
gi|219122368|ref|XP_002181518.1|	predicted protein [Phaeodactylum tricornutum CCAP 1055/1]	VARS, valS	K01873	GO:0005737;GO:0009098;GO:0022008;GO:0004832;GO:0006418;GO:0004812;GO:0005524;GO:0002161;GO:0006450;GO:0009099;GO:0043231;GO:0006438;GO:0009097	1287	C	S	C	S	3	S
gi|219122368|ref|XP_002181518.1|	predicted protein [Phaeodactylum tricornutum CCAP 1055/1]	VARS, valS	K01873	GO:0005737;GO:0009098;GO:0022008;GO:0004832;GO:0006418;GO:0004812;GO:0005524;GO:0002161;GO:0006450;GO:0009099;GO:0043231;GO:0006438;GO:0009097	1296	A	E	A	E	3	S
gi|219122368|ref|XP_002181518.1|	predicted protein [Phaeodactylum tricornutum CCAP 1055/1]	VARS, valS	K01873	GO:0005737;GO:0009098;GO:0022008;GO:0004832;GO:0006418;GO:0004812;GO:0005524;GO:0002161;GO:0006450;GO:0009099;GO:0043231;GO:0006438;GO:0009097	1299	T	V	T	V	3	S
gi|219122368|ref|XP_002181518.1|	predicted protein [Phaeodactylum tricornutum CCAP 1055/1]	VARS, valS	K01873	GO:0005737;GO:0009098;GO:0022008;GO:0004832;GO:0006418;GO:0004812;GO:0005524;GO:0002161;GO:0006450;GO:0009099;GO:0043231;GO:0006438;GO:0009097	1305	T	I	T	I	3	S
gi|219122368|ref|XP_002181518.1|	predicted protein [Phaeodactylum tricornutum CCAP 1055/1]	VARS, valS	K01873	GO:0005737;GO:0009098;GO:0022008;GO:0004832;GO:0006418;GO:0004812;GO:0005524;GO:0002161;GO:0006450;GO:0009099;GO:0043231;GO:0006438;GO:0009097	1317	C	S	C	S	3	S
gi|219122368|ref|XP_002181518.1|	predicted protein [Phaeodactylum tricornutum CCAP 1055/1]	VARS, valS	K01873	GO:0005737;GO:0009098;GO:0022008;GO:0004832;GO:0006418;GO:0004812;GO:0005524;GO:0002161;GO:0006450;GO:0009099;GO:0043231;GO:0006438;GO:0009097	1320	C	P	C	P	3	S
gi|219122368|ref|XP_002181518.1|	predicted protein [Phaeodactylum tricornutum CCAP 1055/1]	VARS, valS	K01873	GO:0005737;GO:0009098;GO:0022008;GO:0004832;GO:0006418;GO:0004812;GO:0005524;GO:0002161;GO:0006450;GO:0009099;GO:0043231;GO:0006438;GO:0009097	1323	G	G	G	G	3	S
gi|219122368|ref|XP_002181518.1|	predicted protein [Phaeodactylum tricornutum CCAP 1055/1]	VARS, valS	K01873	GO:0005737;GO:0009098;GO:0022008;GO:0004832;GO:0006418;GO:0004812;GO:0005524;GO:0002161;GO:0006450;GO:0009099;GO:0043231;GO:0006438;GO:0009097	1326	A	Y	A	Y	3	S
gi|219122368|ref|XP_002181518.1|	predicted protein [Phaeodactylum tricornutum CCAP 1055/1]	VARS, valS	K01873	GO:0005737;GO:0009098;GO:0022008;GO:0004832;GO:0006418;GO:0004812;GO:0005524;GO:0002161;GO:0006450;GO:0009099;GO:0043231;GO:0006438;GO:0009097	1329	A	E	A	E	3	S
gi|219122368|ref|XP_002181518.1|	predicted protein [Phaeodactylum tricornutum CCAP 1055/1]	VARS, valS	K01873	GO:0005737;GO:0009098;GO:0022008;GO:0004832;GO:0006418;GO:0004812;GO:0005524;GO:0002161;GO:0006450;GO:0009099;GO:0043231;GO:0006438;GO:0009097	1341	G	G	G	G	3	S
gi|219122368|ref|XP_002181518.1|	predicted protein [Phaeodactylum tricornutum CCAP 1055/1]	VARS, valS	K01873	GO:0005737;GO:0009098;GO:0022008;GO:0004832;GO:0006418;GO:0004812;GO:0005524;GO:0002161;GO:0006450;GO:0009099;GO:0043231;GO:0006438;GO:0009097	1347	C	A	C	A	3	S
gi|219122368|ref|XP_002181518.1|	predicted protein [Phaeodactylum tricornutum CCAP 1055/1]	VARS, valS	K01873	GO:0005737;GO:0009098;GO:0022008;GO:0004832;GO:0006418;GO:0004812;GO:0005524;GO:0002161;GO:0006450;GO:0009099;GO:0043231;GO:0006438;GO:0009097	1350	A	Y	A	Y	3	S
gi|219122368|ref|XP_002181518.1|	predicted protein [Phaeodactylum tricornutum CCAP 1055/1]	VARS, valS	K01873	GO:0005737;GO:0009098;GO:0022008;GO:0004832;GO:0006418;GO:0004812;GO:0005524;GO:0002161;GO:0006450;GO:0009099;GO:0043231;GO:0006438;GO:0009097	1353	C	P	C	P	3	S
gi|219122368|ref|XP_002181518.1|	predicted protein [Phaeodactylum tricornutum CCAP 1055/1]	VARS, valS	K01873	GO:0005737;GO:0009098;GO:0022008;GO:0004832;GO:0006418;GO:0004812;GO:0005524;GO:0002161;GO:0006450;GO:0009099;GO:0043231;GO:0006438;GO:0009097	1359	A	E	A	E	3	S
gi|219122368|ref|XP_002181518.1|	predicted protein [Phaeodactylum tricornutum CCAP 1055/1]	VARS, valS	K01873	GO:0005737;GO:0009098;GO:0022008;GO:0004832;GO:0006418;GO:0004812;GO:0005524;GO:0002161;GO:0006450;GO:0009099;GO:0043231;GO:0006438;GO:0009097	1362	A	E	A	E	3	S
gi|219122368|ref|XP_002181518.1|	predicted protein [Phaeodactylum tricornutum CCAP 1055/1]	VARS, valS	K01873	GO:0005737;GO:0009098;GO:0022008;GO:0004832;GO:0006418;GO:0004812;GO:0005524;GO:0002161;GO:0006450;GO:0009099;GO:0043231;GO:0006438;GO:0009097	1368	T	V	T	V	3	S
gi|219122368|ref|XP_002181518.1|	predicted protein [Phaeodactylum tricornutum CCAP 1055/1]	VARS, valS	K01873	GO:0005737;GO:0009098;GO:0022008;GO:0004832;GO:0006418;GO:0004812;GO:0005524;GO:0002161;GO:0006450;GO:0009099;GO:0043231;GO:0006438;GO:0009097	1371	T	V	T	V	3	S
gi|219122368|ref|XP_002181518.1|	predicted protein [Phaeodactylum tricornutum CCAP 1055/1]	VARS, valS	K01873	GO:0005737;GO:0009098;GO:0022008;GO:0004832;GO:0006418;GO:0004812;GO:0005524;GO:0002161;GO:0006450;GO:0009099;GO:0043231;GO:0006438;GO:0009097	1374	C	A	C	A	3	S
gi|219122368|ref|XP_002181518.1|	predicted protein [Phaeodactylum tricornutum CCAP 1055/1]	VARS, valS	K01873	GO:0005737;GO:0009098;GO:0022008;GO:0004832;GO:0006418;GO:0004812;GO:0005524;GO:0002161;GO:0006450;GO:0009099;GO:0043231;GO:0006438;GO:0009097	1377	C	T	C	T	3	S
gi|219122368|ref|XP_002181518.1|	predicted protein [Phaeodactylum tricornutum CCAP 1055/1]	VARS, valS	K01873	GO:0005737;GO:0009098;GO:0022008;GO:0004832;GO:0006418;GO:0004812;GO:0005524;GO:0002161;GO:0006450;GO:0009099;GO:0043231;GO:0006438;GO:0009097	1380	C	T	C	T	3	S
gi|219122368|ref|XP_002181518.1|	predicted protein [Phaeodactylum tricornutum CCAP 1055/1]	VARS, valS	K01873	GO:0005737;GO:0009098;GO:0022008;GO:0004832;GO:0006418;GO:0004812;GO:0005524;GO:0002161;GO:0006450;GO:0009099;GO:0043231;GO:0006438;GO:0009097	1386	A	E	A	E	3	S
gi|219122368|ref|XP_002181518.1|	predicted protein [Phaeodactylum tricornutum CCAP 1055/1]	VARS, valS	K01873	GO:0005737;GO:0009098;GO:0022008;GO:0004832;GO:0006418;GO:0004812;GO:0005524;GO:0002161;GO:0006450;GO:0009099;GO:0043231;GO:0006438;GO:0009097	1389	C	T	C	T	3	S
gi|219122368|ref|XP_002181518.1|	predicted protein [Phaeodactylum tricornutum CCAP 1055/1]	VARS, valS	K01873	GO:0005737;GO:0009098;GO:0022008;GO:0004832;GO:0006418;GO:0004812;GO:0005524;GO:0002161;GO:0006450;GO:0009099;GO:0043231;GO:0006438;GO:0009097	1398	G	G	G	G	3	S
gi|219122368|ref|XP_002181518.1|	predicted protein [Phaeodactylum tricornutum CCAP 1055/1]	VARS, valS	K01873	GO:0005737;GO:0009098;GO:0022008;GO:0004832;GO:0006418;GO:0004812;GO:0005524;GO:0002161;GO:0006450;GO:0009099;GO:0043231;GO:0006438;GO:0009097	1401	A	D	A	D	3	S
gi|219122368|ref|XP_002181518.1|	predicted protein [Phaeodactylum tricornutum CCAP 1055/1]	VARS, valS	K01873	GO:0005737;GO:0009098;GO:0022008;GO:0004832;GO:0006418;GO:0004812;GO:0005524;GO:0002161;GO:0006450;GO:0009099;GO:0043231;GO:0006438;GO:0009097	1404	C	A	C	A	3	S
gi|219122368|ref|XP_002181518.1|	predicted protein [Phaeodactylum tricornutum CCAP 1055/1]	VARS, valS	K01873	GO:0005737;GO:0009098;GO:0022008;GO:0004832;GO:0006418;GO:0004812;GO:0005524;GO:0002161;GO:0006450;GO:0009099;GO:0043231;GO:0006438;GO:0009097	1407	C	A	C	A	3	S
gi|219122368|ref|XP_002181518.1|	predicted protein [Phaeodactylum tricornutum CCAP 1055/1]	VARS, valS	K01873	GO:0005737;GO:0009098;GO:0022008;GO:0004832;GO:0006418;GO:0004812;GO:0005524;GO:0002161;GO:0006450;GO:0009099;GO:0043231;GO:0006438;GO:0009097	1410	T	V	T	V	3	S
gi|219122368|ref|XP_002181518.1|	predicted protein [Phaeodactylum tricornutum CCAP 1055/1]	VARS, valS	K01873	GO:0005737;GO:0009098;GO:0022008;GO:0004832;GO:0006418;GO:0004812;GO:0005524;GO:0002161;GO:0006450;GO:0009099;GO:0043231;GO:0006438;GO:0009097	1413	A	H	A	H	3	S
gi|219122368|ref|XP_002181518.1|	predicted protein [Phaeodactylum tricornutum CCAP 1055/1]	VARS, valS	K01873	GO:0005737;GO:0009098;GO:0022008;GO:0004832;GO:0006418;GO:0004812;GO:0005524;GO:0002161;GO:0006450;GO:0009099;GO:0043231;GO:0006438;GO:0009097	1416	C	P	C	P	3	S
gi|219122368|ref|XP_002181518.1|	predicted protein [Phaeodactylum tricornutum CCAP 1055/1]	VARS, valS	K01873	GO:0005737;GO:0009098;GO:0022008;GO:0004832;GO:0006418;GO:0004812;GO:0005524;GO:0002161;GO:0006450;GO:0009099;GO:0043231;GO:0006438;GO:0009097	1419	A	E	A	E	3	S
gi|219122368|ref|XP_002181518.1|	predicted protein [Phaeodactylum tricornutum CCAP 1055/1]	VARS, valS	K01873	GO:0005737;GO:0009098;GO:0022008;GO:0004832;GO:0006418;GO:0004812;GO:0005524;GO:0002161;GO:0006450;GO:0009099;GO:0043231;GO:0006438;GO:0009097	1422	A	D	A	D	3	S
gi|219122368|ref|XP_002181518.1|	predicted protein [Phaeodactylum tricornutum CCAP 1055/1]	VARS, valS	K01873	GO:0005737;GO:0009098;GO:0022008;GO:0004832;GO:0006418;GO:0004812;GO:0005524;GO:0002161;GO:0006450;GO:0009099;GO:0043231;GO:0006438;GO:0009097	1425	G	R	G	R	3	S
gi|219122368|ref|XP_002181518.1|	predicted protein [Phaeodactylum tricornutum CCAP 1055/1]	VARS, valS	K01873	GO:0005737;GO:0009098;GO:0022008;GO:0004832;GO:0006418;GO:0004812;GO:0005524;GO:0002161;GO:0006450;GO:0009099;GO:0043231;GO:0006438;GO:0009097	1434	G	G	G	G	3	S
gi|219122368|ref|XP_002181518.1|	predicted protein [Phaeodactylum tricornutum CCAP 1055/1]	VARS, valS	K01873	GO:0005737;GO:0009098;GO:0022008;GO:0004832;GO:0006418;GO:0004812;GO:0005524;GO:0002161;GO:0006450;GO:0009099;GO:0043231;GO:0006438;GO:0009097	1437	A	K	A	K	3	S
gi|219122368|ref|XP_002181518.1|	predicted protein [Phaeodactylum tricornutum CCAP 1055/1]	VARS, valS	K01873	GO:0005737;GO:0009098;GO:0022008;GO:0004832;GO:0006418;GO:0004812;GO:0005524;GO:0002161;GO:0006450;GO:0009099;GO:0043231;GO:0006438;GO:0009097	1440	A	H	A	H	3	S
gi|219122368|ref|XP_002181518.1|	predicted protein [Phaeodactylum tricornutum CCAP 1055/1]	VARS, valS	K01873	GO:0005737;GO:0009098;GO:0022008;GO:0004832;GO:0006418;GO:0004812;GO:0005524;GO:0002161;GO:0006450;GO:0009099;GO:0043231;GO:0006438;GO:0009097	1443	C	P	C	P	3	S
gi|219122368|ref|XP_002181518.1|	predicted protein [Phaeodactylum tricornutum CCAP 1055/1]	VARS, valS	K01873	GO:0005737;GO:0009098;GO:0022008;GO:0004832;GO:0006418;GO:0004812;GO:0005524;GO:0002161;GO:0006450;GO:0009099;GO:0043231;GO:0006438;GO:0009097	1449	A	N	A	N	3	S
gi|219122368|ref|XP_002181518.1|	predicted protein [Phaeodactylum tricornutum CCAP 1055/1]	VARS, valS	K01873	GO:0005737;GO:0009098;GO:0022008;GO:0004832;GO:0006418;GO:0004812;GO:0005524;GO:0002161;GO:0006450;GO:0009099;GO:0043231;GO:0006438;GO:0009097	1452	G	R	G	R	3	S
gi|219122368|ref|XP_002181518.1|	predicted protein [Phaeodactylum tricornutum CCAP 1055/1]	VARS, valS	K01873	GO:0005737;GO:0009098;GO:0022008;GO:0004832;GO:0006418;GO:0004812;GO:0005524;GO:0002161;GO:0006450;GO:0009099;GO:0043231;GO:0006438;GO:0009097	1455	G	R	G	R	3	S
gi|219122368|ref|XP_002181518.1|	predicted protein [Phaeodactylum tricornutum CCAP 1055/1]	VARS, valS	K01873	GO:0005737;GO:0009098;GO:0022008;GO:0004832;GO:0006418;GO:0004812;GO:0005524;GO:0002161;GO:0006450;GO:0009099;GO:0043231;GO:0006438;GO:0009097	1458	T	I	T	I	3	S
gi|219122368|ref|XP_002181518.1|	predicted protein [Phaeodactylum tricornutum CCAP 1055/1]	VARS, valS	K01873	GO:0005737;GO:0009098;GO:0022008;GO:0004832;GO:0006418;GO:0004812;GO:0005524;GO:0002161;GO:0006450;GO:0009099;GO:0043231;GO:0006438;GO:0009097	1461	C	P	C	P	3	S
gi|219122368|ref|XP_002181518.1|	predicted protein [Phaeodactylum tricornutum CCAP 1055/1]	VARS, valS	K01873	GO:0005737;GO:0009098;GO:0022008;GO:0004832;GO:0006418;GO:0004812;GO:0005524;GO:0002161;GO:0006450;GO:0009099;GO:0043231;GO:0006438;GO:0009097	1464	T	I	T	I	3	S
gi|219122368|ref|XP_002181518.1|	predicted protein [Phaeodactylum tricornutum CCAP 1055/1]	VARS, valS	K01873	GO:0005737;GO:0009098;GO:0022008;GO:0004832;GO:0006418;GO:0004812;GO:0005524;GO:0002161;GO:0006450;GO:0009099;GO:0043231;GO:0006438;GO:0009097	1470	A	D	A	D	3	S
gi|219122368|ref|XP_002181518.1|	predicted protein [Phaeodactylum tricornutum CCAP 1055/1]	VARS, valS	K01873	GO:0005737;GO:0009098;GO:0022008;GO:0004832;GO:0006418;GO:0004812;GO:0005524;GO:0002161;GO:0006450;GO:0009099;GO:0043231;GO:0006438;GO:0009097	1482	T	V	T	V	3	S
gi|219122368|ref|XP_002181518.1|	predicted protein [Phaeodactylum tricornutum CCAP 1055/1]	VARS, valS	K01873	GO:0005737;GO:0009098;GO:0022008;GO:0004832;GO:0006418;GO:0004812;GO:0005524;GO:0002161;GO:0006450;GO:0009099;GO:0043231;GO:0006438;GO:0009097	1494	G	G	G	G	3	S
gi|219122368|ref|XP_002181518.1|	predicted protein [Phaeodactylum tricornutum CCAP 1055/1]	VARS, valS	K01873	GO:0005737;GO:0009098;GO:0022008;GO:0004832;GO:0006418;GO:0004812;GO:0005524;GO:0002161;GO:0006450;GO:0009099;GO:0043231;GO:0006438;GO:0009097	1497	C	T	C	T	3	S
gi|219122368|ref|XP_002181518.1|	predicted protein [Phaeodactylum tricornutum CCAP 1055/1]	VARS, valS	K01873	GO:0005737;GO:0009098;GO:0022008;GO:0004832;GO:0006418;GO:0004812;GO:0005524;GO:0002161;GO:0006450;GO:0009099;GO:0043231;GO:0006438;GO:0009097	1500	G	G	G	G	3	S
gi|219122368|ref|XP_002181518.1|	predicted protein [Phaeodactylum tricornutum CCAP 1055/1]	VARS, valS	K01873	GO:0005737;GO:0009098;GO:0022008;GO:0004832;GO:0006418;GO:0004812;GO:0005524;GO:0002161;GO:0006450;GO:0009099;GO:0043231;GO:0006438;GO:0009097	1503	C	A	C	A	3	S
gi|219122368|ref|XP_002181518.1|	predicted protein [Phaeodactylum tricornutum CCAP 1055/1]	VARS, valS	K01873	GO:0005737;GO:0009098;GO:0022008;GO:0004832;GO:0006418;GO:0004812;GO:0005524;GO:0002161;GO:0006450;GO:0009099;GO:0043231;GO:0006438;GO:0009097	1506	T	V	T	V	3	S
gi|219122368|ref|XP_002181518.1|	predicted protein [Phaeodactylum tricornutum CCAP 1055/1]	VARS, valS	K01873	GO:0005737;GO:0009098;GO:0022008;GO:0004832;GO:0006418;GO:0004812;GO:0005524;GO:0002161;GO:0006450;GO:0009099;GO:0043231;GO:0006438;GO:0009097	1512	T	I	T	I	3	S
gi|219122368|ref|XP_002181518.1|	predicted protein [Phaeodactylum tricornutum CCAP 1055/1]	VARS, valS	K01873	GO:0005737;GO:0009098;GO:0022008;GO:0004832;GO:0006418;GO:0004812;GO:0005524;GO:0002161;GO:0006450;GO:0009099;GO:0043231;GO:0006438;GO:0009097	1515	C	T	C	T	3	S
gi|219122368|ref|XP_002181518.1|	predicted protein [Phaeodactylum tricornutum CCAP 1055/1]	VARS, valS	K01873	GO:0005737;GO:0009098;GO:0022008;GO:0004832;GO:0006418;GO:0004812;GO:0005524;GO:0002161;GO:0006450;GO:0009099;GO:0043231;GO:0006438;GO:0009097	1518	C	P	C	P	3	S
gi|219122368|ref|XP_002181518.1|	predicted protein [Phaeodactylum tricornutum CCAP 1055/1]	VARS, valS	K01873	GO:0005737;GO:0009098;GO:0022008;GO:0004832;GO:0006418;GO:0004812;GO:0005524;GO:0002161;GO:0006450;GO:0009099;GO:0043231;GO:0006438;GO:0009097	1521	C	A	C	A	3	S
gi|219122368|ref|XP_002181518.1|	predicted protein [Phaeodactylum tricornutum CCAP 1055/1]	VARS, valS	K01873	GO:0005737;GO:0009098;GO:0022008;GO:0004832;GO:0006418;GO:0004812;GO:0005524;GO:0002161;GO:0006450;GO:0009099;GO:0043231;GO:0006438;GO:0009097	1524	A	H	A	H	3	S
gi|219122368|ref|XP_002181518.1|	predicted protein [Phaeodactylum tricornutum CCAP 1055/1]	VARS, valS	K01873	GO:0005737;GO:0009098;GO:0022008;GO:0004832;GO:0006418;GO:0004812;GO:0005524;GO:0002161;GO:0006450;GO:0009099;GO:0043231;GO:0006438;GO:0009097	1527	A	D	A	D	3	S
gi|219122368|ref|XP_002181518.1|	predicted protein [Phaeodactylum tricornutum CCAP 1055/1]	VARS, valS	K01873	GO:0005737;GO:0009098;GO:0022008;GO:0004832;GO:0006418;GO:0004812;GO:0005524;GO:0002161;GO:0006450;GO:0009099;GO:0043231;GO:0006438;GO:0009097	1530	C	P	C	P	3	S
gi|219122368|ref|XP_002181518.1|	predicted protein [Phaeodactylum tricornutum CCAP 1055/1]	VARS, valS	K01873	GO:0005737;GO:0009098;GO:0022008;GO:0004832;GO:0006418;GO:0004812;GO:0005524;GO:0002161;GO:0006450;GO:0009099;GO:0043231;GO:0006438;GO:0009097	1533	A	N	A	N	3	S
gi|219122368|ref|XP_002181518.1|	predicted protein [Phaeodactylum tricornutum CCAP 1055/1]	VARS, valS	K01873	GO:0005737;GO:0009098;GO:0022008;GO:0004832;GO:0006418;GO:0004812;GO:0005524;GO:0002161;GO:0006450;GO:0009099;GO:0043231;GO:0006438;GO:0009097	1536	A	D	A	D	3	S
gi|219122368|ref|XP_002181518.1|	predicted protein [Phaeodactylum tricornutum CCAP 1055/1]	VARS, valS	K01873	GO:0005737;GO:0009098;GO:0022008;GO:0004832;GO:0006418;GO:0004812;GO:0005524;GO:0002161;GO:0006450;GO:0009099;GO:0043231;GO:0006438;GO:0009097	1539	T	F	T	F	3	S
gi|219122368|ref|XP_002181518.1|	predicted protein [Phaeodactylum tricornutum CCAP 1055/1]	VARS, valS	K01873	GO:0005737;GO:0009098;GO:0022008;GO:0004832;GO:0006418;GO:0004812;GO:0005524;GO:0002161;GO:0006450;GO:0009099;GO:0043231;GO:0006438;GO:0009097	1542	G	G	G	G	3	S
gi|219122368|ref|XP_002181518.1|	predicted protein [Phaeodactylum tricornutum CCAP 1055/1]	VARS, valS	K01873	GO:0005737;GO:0009098;GO:0022008;GO:0004832;GO:0006418;GO:0004812;GO:0005524;GO:0002161;GO:0006450;GO:0009099;GO:0043231;GO:0006438;GO:0009097	1548	G	R	G	R	3	S
gi|219122368|ref|XP_002181518.1|	predicted protein [Phaeodactylum tricornutum CCAP 1055/1]	VARS, valS	K01873	GO:0005737;GO:0009098;GO:0022008;GO:0004832;GO:0006418;GO:0004812;GO:0005524;GO:0002161;GO:0006450;GO:0009099;GO:0043231;GO:0006438;GO:0009097	1551	A	H	A	H	3	S
gi|219122368|ref|XP_002181518.1|	predicted protein [Phaeodactylum tricornutum CCAP 1055/1]	VARS, valS	K01873	GO:0005737;GO:0009098;GO:0022008;GO:0004832;GO:0006418;GO:0004812;GO:0005524;GO:0002161;GO:0006450;GO:0009099;GO:0043231;GO:0006438;GO:0009097	1557	T	I	T	I	3	S
gi|219122368|ref|XP_002181518.1|	predicted protein [Phaeodactylum tricornutum CCAP 1055/1]	VARS, valS	K01873	GO:0005737;GO:0009098;GO:0022008;GO:0004832;GO:0006418;GO:0004812;GO:0005524;GO:0002161;GO:0006450;GO:0009099;GO:0043231;GO:0006438;GO:0009097	1560	A	N	A	N	3	S
gi|219122368|ref|XP_002181518.1|	predicted protein [Phaeodactylum tricornutum CCAP 1055/1]	VARS, valS	K01873	GO:0005737;GO:0009098;GO:0022008;GO:0004832;GO:0006418;GO:0004812;GO:0005524;GO:0002161;GO:0006450;GO:0009099;GO:0043231;GO:0006438;GO:0009097	1563	T	V	T	V	3	S
gi|219122368|ref|XP_002181518.1|	predicted protein [Phaeodactylum tricornutum CCAP 1055/1]	VARS, valS	K01873	GO:0005737;GO:0009098;GO:0022008;GO:0004832;GO:0006418;GO:0004812;GO:0005524;GO:0002161;GO:0006450;GO:0009099;GO:0043231;GO:0006438;GO:0009097	1572	A	D	A	D	3	S
gi|219122368|ref|XP_002181518.1|	predicted protein [Phaeodactylum tricornutum CCAP 1055/1]	VARS, valS	K01873	GO:0005737;GO:0009098;GO:0022008;GO:0004832;GO:0006418;GO:0004812;GO:0005524;GO:0002161;GO:0006450;GO:0009099;GO:0043231;GO:0006438;GO:0009097	1581	T	I	T	I	3	S
gi|219122368|ref|XP_002181518.1|	predicted protein [Phaeodactylum tricornutum CCAP 1055/1]	VARS, valS	K01873	GO:0005737;GO:0009098;GO:0022008;GO:0004832;GO:0006418;GO:0004812;GO:0005524;GO:0002161;GO:0006450;GO:0009099;GO:0043231;GO:0006438;GO:0009097	1596	G	G	G	G	3	S
gi|219122368|ref|XP_002181518.1|	predicted protein [Phaeodactylum tricornutum CCAP 1055/1]	VARS, valS	K01873	GO:0005737;GO:0009098;GO:0022008;GO:0004832;GO:0006418;GO:0004812;GO:0005524;GO:0002161;GO:0006450;GO:0009099;GO:0043231;GO:0006438;GO:0009097	1599	G	R	G	R	3	S
gi|219122368|ref|XP_002181518.1|	predicted protein [Phaeodactylum tricornutum CCAP 1055/1]	VARS, valS	K01873	GO:0005737;GO:0009098;GO:0022008;GO:0004832;GO:0006418;GO:0004812;GO:0005524;GO:0002161;GO:0006450;GO:0009099;GO:0043231;GO:0006438;GO:0009097	1605	G	R	G	R	3	S
gi|219122368|ref|XP_002181518.1|	predicted protein [Phaeodactylum tricornutum CCAP 1055/1]	VARS, valS	K01873	GO:0005737;GO:0009098;GO:0022008;GO:0004832;GO:0006418;GO:0004812;GO:0005524;GO:0002161;GO:0006450;GO:0009099;GO:0043231;GO:0006438;GO:0009097	1614	A	E	A	E	3	S
gi|219122368|ref|XP_002181518.1|	predicted protein [Phaeodactylum tricornutum CCAP 1055/1]	VARS, valS	K01873	GO:0005737;GO:0009098;GO:0022008;GO:0004832;GO:0006418;GO:0004812;GO:0005524;GO:0002161;GO:0006450;GO:0009099;GO:0043231;GO:0006438;GO:0009097	1617	A	K	A	K	3	S
gi|219122368|ref|XP_002181518.1|	predicted protein [Phaeodactylum tricornutum CCAP 1055/1]	VARS, valS	K01873	GO:0005737;GO:0009098;GO:0022008;GO:0004832;GO:0006418;GO:0004812;GO:0005524;GO:0002161;GO:0006450;GO:0009099;GO:0043231;GO:0006438;GO:0009097	1620	G	G	G	G	3	S
gi|219122368|ref|XP_002181518.1|	predicted protein [Phaeodactylum tricornutum CCAP 1055/1]	VARS, valS	K01873	GO:0005737;GO:0009098;GO:0022008;GO:0004832;GO:0006418;GO:0004812;GO:0005524;GO:0002161;GO:0006450;GO:0009099;GO:0043231;GO:0006438;GO:0009097	1629	G	G	G	G	3	S
gi|219122368|ref|XP_002181518.1|	predicted protein [Phaeodactylum tricornutum CCAP 1055/1]	VARS, valS	K01873	GO:0005737;GO:0009098;GO:0022008;GO:0004832;GO:0006418;GO:0004812;GO:0005524;GO:0002161;GO:0006450;GO:0009099;GO:0043231;GO:0006438;GO:0009097	1647	G	R	G	R	3	S
gi|219122368|ref|XP_002181518.1|	predicted protein [Phaeodactylum tricornutum CCAP 1055/1]	VARS, valS	K01873	GO:0005737;GO:0009098;GO:0022008;GO:0004832;GO:0006418;GO:0004812;GO:0005524;GO:0002161;GO:0006450;GO:0009099;GO:0043231;GO:0006438;GO:0009097	1650	C	S	C	S	3	S
gi|219122368|ref|XP_002181518.1|	predicted protein [Phaeodactylum tricornutum CCAP 1055/1]	VARS, valS	K01873	GO:0005737;GO:0009098;GO:0022008;GO:0004832;GO:0006418;GO:0004812;GO:0005524;GO:0002161;GO:0006450;GO:0009099;GO:0043231;GO:0006438;GO:0009097	1653	A	K	A	K	3	S
gi|219122368|ref|XP_002181518.1|	predicted protein [Phaeodactylum tricornutum CCAP 1055/1]	VARS, valS	K01873	GO:0005737;GO:0009098;GO:0022008;GO:0004832;GO:0006418;GO:0004812;GO:0005524;GO:0002161;GO:0006450;GO:0009099;GO:0043231;GO:0006438;GO:0009097	1656	A	D	A	D	3	S
gi|219122368|ref|XP_002181518.1|	predicted protein [Phaeodactylum tricornutum CCAP 1055/1]	VARS, valS	K01873	GO:0005737;GO:0009098;GO:0022008;GO:0004832;GO:0006418;GO:0004812;GO:0005524;GO:0002161;GO:0006450;GO:0009099;GO:0043231;GO:0006438;GO:0009097	1659	T	V	T	V	3	S
gi|219122368|ref|XP_002181518.1|	predicted protein [Phaeodactylum tricornutum CCAP 1055/1]	VARS, valS	K01873	GO:0005737;GO:0009098;GO:0022008;GO:0004832;GO:0006418;GO:0004812;GO:0005524;GO:0002161;GO:0006450;GO:0009099;GO:0043231;GO:0006438;GO:0009097	1665	A	E	A	E	3	S
gi|219122368|ref|XP_002181518.1|	predicted protein [Phaeodactylum tricornutum CCAP 1055/1]	VARS, valS	K01873	GO:0005737;GO:0009098;GO:0022008;GO:0004832;GO:0006418;GO:0004812;GO:0005524;GO:0002161;GO:0006450;GO:0009099;GO:0043231;GO:0006438;GO:0009097	1668	C	P	C	P	3	S
gi|219122368|ref|XP_002181518.1|	predicted protein [Phaeodactylum tricornutum CCAP 1055/1]	VARS, valS	K01873	GO:0005737;GO:0009098;GO:0022008;GO:0004832;GO:0006418;GO:0004812;GO:0005524;GO:0002161;GO:0006450;GO:0009099;GO:0043231;GO:0006438;GO:0009097	1671	T	L	T	L	3	S
gi|219122368|ref|XP_002181518.1|	predicted protein [Phaeodactylum tricornutum CCAP 1055/1]	VARS, valS	K01873	GO:0005737;GO:0009098;GO:0022008;GO:0004832;GO:0006418;GO:0004812;GO:0005524;GO:0002161;GO:0006450;GO:0009099;GO:0043231;GO:0006438;GO:0009097	1674	A	K	A	K	3	S
gi|219122368|ref|XP_002181518.1|	predicted protein [Phaeodactylum tricornutum CCAP 1055/1]	VARS, valS	K01873	GO:0005737;GO:0009098;GO:0022008;GO:0004832;GO:0006418;GO:0004812;GO:0005524;GO:0002161;GO:0006450;GO:0009099;GO:0043231;GO:0006438;GO:0009097	1677	C	P	C	P	3	S
gi|219122368|ref|XP_002181518.1|	predicted protein [Phaeodactylum tricornutum CCAP 1055/1]	VARS, valS	K01873	GO:0005737;GO:0009098;GO:0022008;GO:0004832;GO:0006418;GO:0004812;GO:0005524;GO:0002161;GO:0006450;GO:0009099;GO:0043231;GO:0006438;GO:0009097	1680	A	Q	A	Q	3	S
gi|219122368|ref|XP_002181518.1|	predicted protein [Phaeodactylum tricornutum CCAP 1055/1]	VARS, valS	K01873	GO:0005737;GO:0009098;GO:0022008;GO:0004832;GO:0006418;GO:0004812;GO:0005524;GO:0002161;GO:0006450;GO:0009099;GO:0043231;GO:0006438;GO:0009097	1686	T	V	T	V	3	S
gi|219122368|ref|XP_002181518.1|	predicted protein [Phaeodactylum tricornutum CCAP 1055/1]	VARS, valS	K01873	GO:0005737;GO:0009098;GO:0022008;GO:0004832;GO:0006418;GO:0004812;GO:0005524;GO:0002161;GO:0006450;GO:0009099;GO:0043231;GO:0006438;GO:0009097	1689	A	D	A	D	3	S
gi|219122368|ref|XP_002181518.1|	predicted protein [Phaeodactylum tricornutum CCAP 1055/1]	VARS, valS	K01873	GO:0005737;GO:0009098;GO:0022008;GO:0004832;GO:0006418;GO:0004812;GO:0005524;GO:0002161;GO:0006450;GO:0009099;GO:0043231;GO:0006438;GO:0009097	1698	C	A	C	A	3	S
gi|219122368|ref|XP_002181518.1|	predicted protein [Phaeodactylum tricornutum CCAP 1055/1]	VARS, valS	K01873	GO:0005737;GO:0009098;GO:0022008;GO:0004832;GO:0006418;GO:0004812;GO:0005524;GO:0002161;GO:0006450;GO:0009099;GO:0043231;GO:0006438;GO:0009097	1701	C	A	C	A	3	S
gi|219122368|ref|XP_002181518.1|	predicted protein [Phaeodactylum tricornutum CCAP 1055/1]	VARS, valS	K01873	GO:0005737;GO:0009098;GO:0022008;GO:0004832;GO:0006418;GO:0004812;GO:0005524;GO:0002161;GO:0006450;GO:0009099;GO:0043231;GO:0006438;GO:0009097	1713	A	D	A	D	3	S
gi|219122368|ref|XP_002181518.1|	predicted protein [Phaeodactylum tricornutum CCAP 1055/1]	VARS, valS	K01873	GO:0005737;GO:0009098;GO:0022008;GO:0004832;GO:0006418;GO:0004812;GO:0005524;GO:0002161;GO:0006450;GO:0009099;GO:0043231;GO:0006438;GO:0009097	1716	G	G	G	G	3	S
gi|219122368|ref|XP_002181518.1|	predicted protein [Phaeodactylum tricornutum CCAP 1055/1]	VARS, valS	K01873	GO:0005737;GO:0009098;GO:0022008;GO:0004832;GO:0006418;GO:0004812;GO:0005524;GO:0002161;GO:0006450;GO:0009099;GO:0043231;GO:0006438;GO:0009097	1728	C	P	C	P	3	S
gi|219122368|ref|XP_002181518.1|	predicted protein [Phaeodactylum tricornutum CCAP 1055/1]	VARS, valS	K01873	GO:0005737;GO:0009098;GO:0022008;GO:0004832;GO:0006418;GO:0004812;GO:0005524;GO:0002161;GO:0006450;GO:0009099;GO:0043231;GO:0006438;GO:0009097	2265	A	Q	A	Q	3	S
gi|219122368|ref|XP_002181518.1|	predicted protein [Phaeodactylum tricornutum CCAP 1055/1]	VARS, valS	K01873	GO:0005737;GO:0009098;GO:0022008;GO:0004832;GO:0006418;GO:0004812;GO:0005524;GO:0002161;GO:0006450;GO:0009099;GO:0043231;GO:0006438;GO:0009097	2298	G	G	G	G	3	S
gi|219122368|ref|XP_002181518.1|	predicted protein [Phaeodactylum tricornutum CCAP 1055/1]	VARS, valS	K01873	GO:0005737;GO:0009098;GO:0022008;GO:0004832;GO:0006418;GO:0004812;GO:0005524;GO:0002161;GO:0006450;GO:0009099;GO:0043231;GO:0006438;GO:0009097	2310	C	T	C	T	3	S
gi|219122368|ref|XP_002181518.1|	predicted protein [Phaeodactylum tricornutum CCAP 1055/1]	VARS, valS	K01873	GO:0005737;GO:0009098;GO:0022008;GO:0004832;GO:0006418;GO:0004812;GO:0005524;GO:0002161;GO:0006450;GO:0009099;GO:0043231;GO:0006438;GO:0009097	2325	A	E	A	E	3	S
gi|219122368|ref|XP_002181518.1|	predicted protein [Phaeodactylum tricornutum CCAP 1055/1]	VARS, valS	K01873	GO:0005737;GO:0009098;GO:0022008;GO:0004832;GO:0006418;GO:0004812;GO:0005524;GO:0002161;GO:0006450;GO:0009099;GO:0043231;GO:0006438;GO:0009097	2331	T	F	T	F	3	S
gi|219122368|ref|XP_002181518.1|	predicted protein [Phaeodactylum tricornutum CCAP 1055/1]	VARS, valS	K01873	GO:0005737;GO:0009098;GO:0022008;GO:0004832;GO:0006418;GO:0004812;GO:0005524;GO:0002161;GO:0006450;GO:0009099;GO:0043231;GO:0006438;GO:0009097	2334	C	T	C	T	3	S
gi|219122368|ref|XP_002181518.1|	predicted protein [Phaeodactylum tricornutum CCAP 1055/1]	VARS, valS	K01873	GO:0005737;GO:0009098;GO:0022008;GO:0004832;GO:0006418;GO:0004812;GO:0005524;GO:0002161;GO:0006450;GO:0009099;GO:0043231;GO:0006438;GO:0009097	2421	C	T	C	T	3	S
gi|219122368|ref|XP_002181518.1|	predicted protein [Phaeodactylum tricornutum CCAP 1055/1]	VARS, valS	K01873	GO:0005737;GO:0009098;GO:0022008;GO:0004832;GO:0006418;GO:0004812;GO:0005524;GO:0002161;GO:0006450;GO:0009099;GO:0043231;GO:0006438;GO:0009097	2427	G	C	G	C	3	S
gi|219122368|ref|XP_002181518.1|	predicted protein [Phaeodactylum tricornutum CCAP 1055/1]	VARS, valS	K01873	GO:0005737;GO:0009098;GO:0022008;GO:0004832;GO:0006418;GO:0004812;GO:0005524;GO:0002161;GO:0006450;GO:0009099;GO:0043231;GO:0006438;GO:0009097	2433	A	E	A	E	3	S
gi|219122368|ref|XP_002181518.1|	predicted protein [Phaeodactylum tricornutum CCAP 1055/1]	VARS, valS	K01873	GO:0005737;GO:0009098;GO:0022008;GO:0004832;GO:0006418;GO:0004812;GO:0005524;GO:0002161;GO:0006450;GO:0009099;GO:0043231;GO:0006438;GO:0009097	2445	A	H	A	H	3	S
gi|219122368|ref|XP_002181518.1|	predicted protein [Phaeodactylum tricornutum CCAP 1055/1]	VARS, valS	K01873	GO:0005737;GO:0009098;GO:0022008;GO:0004832;GO:0006418;GO:0004812;GO:0005524;GO:0002161;GO:0006450;GO:0009099;GO:0043231;GO:0006438;GO:0009097	2448	C	P	C	P	3	S
gi|219122368|ref|XP_002181518.1|	predicted protein [Phaeodactylum tricornutum CCAP 1055/1]	VARS, valS	K01873	GO:0005737;GO:0009098;GO:0022008;GO:0004832;GO:0006418;GO:0004812;GO:0005524;GO:0002161;GO:0006450;GO:0009099;GO:0043231;GO:0006438;GO:0009097	2454	C	P	C	P	3	S
gi|219122368|ref|XP_002181518.1|	predicted protein [Phaeodactylum tricornutum CCAP 1055/1]	VARS, valS	K01873	GO:0005737;GO:0009098;GO:0022008;GO:0004832;GO:0006418;GO:0004812;GO:0005524;GO:0002161;GO:0006450;GO:0009099;GO:0043231;GO:0006438;GO:0009097	2463	C	T	C	T	3	S
gi|219122368|ref|XP_002181518.1|	predicted protein [Phaeodactylum tricornutum CCAP 1055/1]	VARS, valS	K01873	GO:0005737;GO:0009098;GO:0022008;GO:0004832;GO:0006418;GO:0004812;GO:0005524;GO:0002161;GO:0006450;GO:0009099;GO:0043231;GO:0006438;GO:0009097	2466	A	E	A	E	3	S
gi|219122368|ref|XP_002181518.1|	predicted protein [Phaeodactylum tricornutum CCAP 1055/1]	VARS, valS	K01873	GO:0005737;GO:0009098;GO:0022008;GO:0004832;GO:0006418;GO:0004812;GO:0005524;GO:0002161;GO:0006450;GO:0009099;GO:0043231;GO:0006438;GO:0009097	2469	A	E	A	E	3	S
gi|219122368|ref|XP_002181518.1|	predicted protein [Phaeodactylum tricornutum CCAP 1055/1]	VARS, valS	K01873	GO:0005737;GO:0009098;GO:0022008;GO:0004832;GO:0006418;GO:0004812;GO:0005524;GO:0002161;GO:0006450;GO:0009099;GO:0043231;GO:0006438;GO:0009097	2478	A	Q	A	Q	3	S
gi|219122368|ref|XP_002181518.1|	predicted protein [Phaeodactylum tricornutum CCAP 1055/1]	VARS, valS	K01873	GO:0005737;GO:0009098;GO:0022008;GO:0004832;GO:0006418;GO:0004812;GO:0005524;GO:0002161;GO:0006450;GO:0009099;GO:0043231;GO:0006438;GO:0009097	2502	G	R	G	R	3	S
gi|219122368|ref|XP_002181518.1|	predicted protein [Phaeodactylum tricornutum CCAP 1055/1]	VARS, valS	K01873	GO:0005737;GO:0009098;GO:0022008;GO:0004832;GO:0006418;GO:0004812;GO:0005524;GO:0002161;GO:0006450;GO:0009099;GO:0043231;GO:0006438;GO:0009097	2535	G	G	G	G	3	S
gi|219122368|ref|XP_002181518.1|	predicted protein [Phaeodactylum tricornutum CCAP 1055/1]	VARS, valS	K01873	GO:0005737;GO:0009098;GO:0022008;GO:0004832;GO:0006418;GO:0004812;GO:0005524;GO:0002161;GO:0006450;GO:0009099;GO:0043231;GO:0006438;GO:0009097	2583	G	S	G	S	3	S
gi|219122368|ref|XP_002181518.1|	predicted protein [Phaeodactylum tricornutum CCAP 1055/1]	VARS, valS	K01873	GO:0005737;GO:0009098;GO:0022008;GO:0004832;GO:0006418;GO:0004812;GO:0005524;GO:0002161;GO:0006450;GO:0009099;GO:0043231;GO:0006438;GO:0009097	2589	G	C	G	C	3	S
gi|219122368|ref|XP_002181518.1|	predicted protein [Phaeodactylum tricornutum CCAP 1055/1]	VARS, valS	K01873	GO:0005737;GO:0009098;GO:0022008;GO:0004832;GO:0006418;GO:0004812;GO:0005524;GO:0002161;GO:0006450;GO:0009099;GO:0043231;GO:0006438;GO:0009097	2634	C	T	C	T	3	S
gi|219122368|ref|XP_002181518.1|	predicted protein [Phaeodactylum tricornutum CCAP 1055/1]	VARS, valS	K01873	GO:0005737;GO:0009098;GO:0022008;GO:0004832;GO:0006418;GO:0004812;GO:0005524;GO:0002161;GO:0006450;GO:0009099;GO:0043231;GO:0006438;GO:0009097	2640	T	I	T	I	3	S
gi|219122368|ref|XP_002181518.1|	predicted protein [Phaeodactylum tricornutum CCAP 1055/1]	VARS, valS	K01873	GO:0005737;GO:0009098;GO:0022008;GO:0004832;GO:0006418;GO:0004812;GO:0005524;GO:0002161;GO:0006450;GO:0009099;GO:0043231;GO:0006438;GO:0009097	2646	A	Q	A	Q	3	S
gi|219122368|ref|XP_002181518.1|	predicted protein [Phaeodactylum tricornutum CCAP 1055/1]	VARS, valS	K01873	GO:0005737;GO:0009098;GO:0022008;GO:0004832;GO:0006418;GO:0004812;GO:0005524;GO:0002161;GO:0006450;GO:0009099;GO:0043231;GO:0006438;GO:0009097	2655	A	E	A	E	3	S
gi|219122368|ref|XP_002181518.1|	predicted protein [Phaeodactylum tricornutum CCAP 1055/1]	VARS, valS	K01873	GO:0005737;GO:0009098;GO:0022008;GO:0004832;GO:0006418;GO:0004812;GO:0005524;GO:0002161;GO:0006450;GO:0009099;GO:0043231;GO:0006438;GO:0009097	2661	G	C	G	C	3	S
gi|219122368|ref|XP_002181518.1|	predicted protein [Phaeodactylum tricornutum CCAP 1055/1]	VARS, valS	K01873	GO:0005737;GO:0009098;GO:0022008;GO:0004832;GO:0006418;GO:0004812;GO:0005524;GO:0002161;GO:0006450;GO:0009099;GO:0043231;GO:0006438;GO:0009097	2664	T	V	T	V	3	S
gi|219122368|ref|XP_002181518.1|	predicted protein [Phaeodactylum tricornutum CCAP 1055/1]	VARS, valS	K01873	GO:0005737;GO:0009098;GO:0022008;GO:0004832;GO:0006418;GO:0004812;GO:0005524;GO:0002161;GO:0006450;GO:0009099;GO:0043231;GO:0006438;GO:0009097	2667	T	V	T	V	3	S
gi|219122368|ref|XP_002181518.1|	predicted protein [Phaeodactylum tricornutum CCAP 1055/1]	VARS, valS	K01873	GO:0005737;GO:0009098;GO:0022008;GO:0004832;GO:0006418;GO:0004812;GO:0005524;GO:0002161;GO:0006450;GO:0009099;GO:0043231;GO:0006438;GO:0009097	2679	G	G	G	G	3	S
gi|219122368|ref|XP_002181518.1|	predicted protein [Phaeodactylum tricornutum CCAP 1055/1]	VARS, valS	K01873	GO:0005737;GO:0009098;GO:0022008;GO:0004832;GO:0006418;GO:0004812;GO:0005524;GO:0002161;GO:0006450;GO:0009099;GO:0043231;GO:0006438;GO:0009097	2691	C	A	C	A	3	S
gi|219122368|ref|XP_002181518.1|	predicted protein [Phaeodactylum tricornutum CCAP 1055/1]	VARS, valS	K01873	GO:0005737;GO:0009098;GO:0022008;GO:0004832;GO:0006418;GO:0004812;GO:0005524;GO:0002161;GO:0006450;GO:0009099;GO:0043231;GO:0006438;GO:0009097	2835	G	G	G	G	3	S
gi|219110149|ref|XP_002176826.1|	predicted protein [Phaeodactylum tricornutum CCAP 1055/1]	VAMP7	K08515	GO:0016192;GO:0016021	51	C	A	C	A	3	S
gi|219110149|ref|XP_002176826.1|	predicted protein [Phaeodactylum tricornutum CCAP 1055/1]	VAMP7	K08515	GO:0016192;GO:0016021	81	A	Q	A	Q	3	S
gi|219110149|ref|XP_002176826.1|	predicted protein [Phaeodactylum tricornutum CCAP 1055/1]	VAMP7	K08515	GO:0016192;GO:0016021	99	G	R	G	R	3	S
gi|219110149|ref|XP_002176826.1|	predicted protein [Phaeodactylum tricornutum CCAP 1055/1]	VAMP7	K08515	GO:0016192;GO:0016021	153	A	D	A	D	3	S
gi|219110149|ref|XP_002176826.1|	predicted protein [Phaeodactylum tricornutum CCAP 1055/1]	VAMP7	K08515	GO:0016192;GO:0016021	162	A	H	A	H	3	S
gi|219110149|ref|XP_002176826.1|	predicted protein [Phaeodactylum tricornutum CCAP 1055/1]	VAMP7	K08515	GO:0016192;GO:0016021	165	G	G	G	G	3	S
gi|219110149|ref|XP_002176826.1|	predicted protein [Phaeodactylum tricornutum CCAP 1055/1]	VAMP7	K08515	GO:0016192;GO:0016021	171	G	C	G	C	3	S
gi|219110149|ref|XP_002176826.1|	predicted protein [Phaeodactylum tricornutum CCAP 1055/1]	VAMP7	K08515	GO:0016192;GO:0016021	180	G	R	G	R	3	S
gi|219110149|ref|XP_002176826.1|	predicted protein [Phaeodactylum tricornutum CCAP 1055/1]	VAMP7	K08515	GO:0016192;GO:0016021	183	C	P	C	P	3	S
gi|219110149|ref|XP_002176826.1|	predicted protein [Phaeodactylum tricornutum CCAP 1055/1]	VAMP7	K08515	GO:0016192;GO:0016021	201	T	F	T	F	3	S
gi|219110149|ref|XP_002176826.1|	predicted protein [Phaeodactylum tricornutum CCAP 1055/1]	VAMP7	K08515	GO:0016192;GO:0016021	213	A	D	A	D	3	S
gi|219110149|ref|XP_002176826.1|	predicted protein [Phaeodactylum tricornutum CCAP 1055/1]	VAMP7	K08515	GO:0016192;GO:0016021	243	A	D	A	D	3	S
gi|219110149|ref|XP_002176826.1|	predicted protein [Phaeodactylum tricornutum CCAP 1055/1]	VAMP7	K08515	GO:0016192;GO:0016021	249	C	T	C	T	3	S
gi|219110149|ref|XP_002176826.1|	predicted protein [Phaeodactylum tricornutum CCAP 1055/1]	VAMP7	K08515	GO:0016192;GO:0016021	261	A	Y	A	Y	3	S
gi|219110149|ref|XP_002176826.1|	predicted protein [Phaeodactylum tricornutum CCAP 1055/1]	VAMP7	K08515	GO:0016192;GO:0016021	387	C	S	C	S	3	S
gi|219110149|ref|XP_002176826.1|	predicted protein [Phaeodactylum tricornutum CCAP 1055/1]	VAMP7	K08515	GO:0016192;GO:0016021	393	C	A	C	A	3	S
gi|219110149|ref|XP_002176826.1|	predicted protein [Phaeodactylum tricornutum CCAP 1055/1]	VAMP7	K08515	GO:0016192;GO:0016021	402	G	G	G	G	3	S
gi|219110149|ref|XP_002176826.1|	predicted protein [Phaeodactylum tricornutum CCAP 1055/1]	VAMP7	K08515	GO:0016192;GO:0016021	426	C	S	C	S	3	S
gi|219110149|ref|XP_002176826.1|	predicted protein [Phaeodactylum tricornutum CCAP 1055/1]	VAMP7	K08515	GO:0016192;GO:0016021	438	G	G	G	G	3	S
gi|219118591|ref|XP_002180065.1|	predicted protein [Phaeodactylum tricornutum CCAP 1055/1]	UTP6	K14557	_	1707	C	A	C	A	3	S
gi|219118591|ref|XP_002180065.1|	predicted protein [Phaeodactylum tricornutum CCAP 1055/1]	UTP6	K14557	_	1764	C	A	C	A	3	S
gi|223993517|ref|XP_002286442.1|	hypothetical protein THAPSDRAFT_268130 [Thalassiosira pseudonana CCMP1335]	UTP4, CIRH1A	K14548	_	276	A	K	A	K	3	S
gi|223993517|ref|XP_002286442.1|	hypothetical protein THAPSDRAFT_268130 [Thalassiosira pseudonana CCMP1335]	UTP4, CIRH1A	K14548	_	279	A	Q	A	Q	3	S
gi|223993517|ref|XP_002286442.1|	hypothetical protein THAPSDRAFT_268130 [Thalassiosira pseudonana CCMP1335]	UTP4, CIRH1A	K14548	_	282	C	A	C	A	3	S
gi|223993517|ref|XP_002286442.1|	hypothetical protein THAPSDRAFT_268130 [Thalassiosira pseudonana CCMP1335]	UTP4, CIRH1A	K14548	_	285	T	V	T	V	3	S
gi|223993517|ref|XP_002286442.1|	hypothetical protein THAPSDRAFT_268130 [Thalassiosira pseudonana CCMP1335]	UTP4, CIRH1A	K14548	_	516	C	P	C	P	3	S
gi|223993517|ref|XP_002286442.1|	hypothetical protein THAPSDRAFT_268130 [Thalassiosira pseudonana CCMP1335]	UTP4, CIRH1A	K14548	_	1497	G	R	G	R	3	S
gi|223993517|ref|XP_002286442.1|	hypothetical protein THAPSDRAFT_268130 [Thalassiosira pseudonana CCMP1335]	UTP4, CIRH1A	K14548	_	1530	G	S	G	S	3	S
gi|224009656|ref|XP_002293786.1|	hypothetical protein THAPSDRAFT_269776 [Thalassiosira pseudonana CCMP1335]	UTP30, RSL1D1	K14775	GO:0003735;GO:0005622;GO:0006412;GO:0003723;GO:0042254;GO:0015934	186	T	V	T	V	3	S
gi|224009656|ref|XP_002293786.1|	hypothetical protein THAPSDRAFT_269776 [Thalassiosira pseudonana CCMP1335]	UTP30, RSL1D1	K14775	GO:0003735;GO:0005622;GO:0006412;GO:0003723;GO:0042254;GO:0015934	192	C	A	C	A	3	S
gi|224009656|ref|XP_002293786.1|	hypothetical protein THAPSDRAFT_269776 [Thalassiosira pseudonana CCMP1335]	UTP30, RSL1D1	K14775	GO:0003735;GO:0005622;GO:0006412;GO:0003723;GO:0042254;GO:0015934	195	A	Q	A	Q	3	S
gi|224009656|ref|XP_002293786.1|	hypothetical protein THAPSDRAFT_269776 [Thalassiosira pseudonana CCMP1335]	UTP30, RSL1D1	K14775	GO:0003735;GO:0005622;GO:0006412;GO:0003723;GO:0042254;GO:0015934	246	T	V	T	V	3	S
gi|224009656|ref|XP_002293786.1|	hypothetical protein THAPSDRAFT_269776 [Thalassiosira pseudonana CCMP1335]	UTP30, RSL1D1	K14775	GO:0003735;GO:0005622;GO:0006412;GO:0003723;GO:0042254;GO:0015934	264	C	A	C	A	3	S
gi|224009656|ref|XP_002293786.1|	hypothetical protein THAPSDRAFT_269776 [Thalassiosira pseudonana CCMP1335]	UTP30, RSL1D1	K14775	GO:0003735;GO:0005622;GO:0006412;GO:0003723;GO:0042254;GO:0015934	291	A	N	A	N	3	S
gi|224009656|ref|XP_002293786.1|	hypothetical protein THAPSDRAFT_269776 [Thalassiosira pseudonana CCMP1335]	UTP30, RSL1D1	K14775	GO:0003735;GO:0005622;GO:0006412;GO:0003723;GO:0042254;GO:0015934	750	T	V	T	V	3	S
gi|224009656|ref|XP_002293786.1|	hypothetical protein THAPSDRAFT_269776 [Thalassiosira pseudonana CCMP1335]	UTP30, RSL1D1	K14775	GO:0003735;GO:0005622;GO:0006412;GO:0003723;GO:0042254;GO:0015934	1464	T	F	T	F	3	S
gi|224009656|ref|XP_002293786.1|	hypothetical protein THAPSDRAFT_269776 [Thalassiosira pseudonana CCMP1335]	UTP30, RSL1D1	K14775	GO:0003735;GO:0005622;GO:0006412;GO:0003723;GO:0042254;GO:0015934	1473	C	S	C	S	3	S
gi|224009656|ref|XP_002293786.1|	hypothetical protein THAPSDRAFT_269776 [Thalassiosira pseudonana CCMP1335]	UTP30, RSL1D1	K14775	GO:0003735;GO:0005622;GO:0006412;GO:0003723;GO:0042254;GO:0015934	1515	G	G	G	G	3	S
gi|219111341|ref|XP_002177422.1|	regulator of chromatin silencing [Phaeodactylum tricornutum CCAP 1055/1]	UTP3, SAS10	K14767	_	1590	G	G	G	G	3	S
gi|219111341|ref|XP_002177422.1|	regulator of chromatin silencing [Phaeodactylum tricornutum CCAP 1055/1]	UTP3, SAS10	K14767	_	1629	G	G	G	G	3	S
gi|219111341|ref|XP_002177422.1|	regulator of chromatin silencing [Phaeodactylum tricornutum CCAP 1055/1]	UTP3, SAS10	K14767	_	1638	C	A	C	A	3	S
gi|219114203|ref|XP_002176274.1|	predicted protein [Phaeodactylum tricornutum CCAP 1055/1]	UTP22, NOL6	K14544	_	87	C	S	C	S	3	S
gi|219114203|ref|XP_002176274.1|	predicted protein [Phaeodactylum tricornutum CCAP 1055/1]	UTP22, NOL6	K14544	_	405	T	F	T	F	3	S
gi|219114203|ref|XP_002176274.1|	predicted protein [Phaeodactylum tricornutum CCAP 1055/1]	UTP22, NOL6	K14544	_	1239	C	P	C	P	3	S
gi|219114203|ref|XP_002176274.1|	predicted protein [Phaeodactylum tricornutum CCAP 1055/1]	UTP22, NOL6	K14544	_	1452	G	G	G	G	3	S
gi|219114203|ref|XP_002176274.1|	predicted protein [Phaeodactylum tricornutum CCAP 1055/1]	UTP22, NOL6	K14544	_	1458	G	R	G	R	3	S
gi|219114203|ref|XP_002176274.1|	predicted protein [Phaeodactylum tricornutum CCAP 1055/1]	UTP22, NOL6	K14544	_	1467	C	A	C	A	3	S
gi|219114203|ref|XP_002176274.1|	predicted protein [Phaeodactylum tricornutum CCAP 1055/1]	UTP22, NOL6	K14544	_	1626	A	N	A	N	3	S
gi|219114203|ref|XP_002176274.1|	predicted protein [Phaeodactylum tricornutum CCAP 1055/1]	UTP22, NOL6	K14544	_	1731	G	R	G	R	3	S
gi|219114203|ref|XP_002176274.1|	predicted protein [Phaeodactylum tricornutum CCAP 1055/1]	UTP22, NOL6	K14544	_	2100	C	S	C	S	3	S
gi|219114203|ref|XP_002176274.1|	predicted protein [Phaeodactylum tricornutum CCAP 1055/1]	UTP22, NOL6	K14544	_	2349	T	V	T	V	3	S
gi|219114203|ref|XP_002176274.1|	predicted protein [Phaeodactylum tricornutum CCAP 1055/1]	UTP22, NOL6	K14544	_	2355	C	P	C	P	3	S
gi|219114203|ref|XP_002176274.1|	predicted protein [Phaeodactylum tricornutum CCAP 1055/1]	UTP22, NOL6	K14544	_	2442	T	V	T	V	3	S
gi|219114203|ref|XP_002176274.1|	predicted protein [Phaeodactylum tricornutum CCAP 1055/1]	UTP22, NOL6	K14544	_	2580	G	R	G	R	3	S
gi|219114203|ref|XP_002176274.1|	predicted protein [Phaeodactylum tricornutum CCAP 1055/1]	UTP22, NOL6	K14544	_	2643	C	A	C	A	3	S
gi|219110583|ref|XP_002177043.1|	predicted protein [Phaeodactylum tricornutum CCAP 1055/1]	UTP21, WDR36	K14554	GO:0044424	33	C	A	C	A	3	S
gi|219110583|ref|XP_002177043.1|	predicted protein [Phaeodactylum tricornutum CCAP 1055/1]	UTP21, WDR36	K14554	GO:0044424	618	C	A	C	A	3	S
gi|219110583|ref|XP_002177043.1|	predicted protein [Phaeodactylum tricornutum CCAP 1055/1]	UTP21, WDR36	K14554	GO:0044424	717	C	S	C	S	3	S
gi|219110583|ref|XP_002177043.1|	predicted protein [Phaeodactylum tricornutum CCAP 1055/1]	UTP21, WDR36	K14554	GO:0044424	1077	C	A	C	A	3	S
gi|219110583|ref|XP_002177043.1|	predicted protein [Phaeodactylum tricornutum CCAP 1055/1]	UTP21, WDR36	K14554	GO:0044424	1230	C	S	C	S	3	S
gi|219110583|ref|XP_002177043.1|	predicted protein [Phaeodactylum tricornutum CCAP 1055/1]	UTP21, WDR36	K14554	GO:0044424	1251	C	S	C	S	3	S
gi|219110583|ref|XP_002177043.1|	predicted protein [Phaeodactylum tricornutum CCAP 1055/1]	UTP21, WDR36	K14554	GO:0044424	1437	T	I	T	I	3	S
gi|219110583|ref|XP_002177043.1|	predicted protein [Phaeodactylum tricornutum CCAP 1055/1]	UTP21, WDR36	K14554	GO:0044424	1626	C	S	C	S	3	S
gi|219110583|ref|XP_002177043.1|	predicted protein [Phaeodactylum tricornutum CCAP 1055/1]	UTP21, WDR36	K14554	GO:0044424	1662	T	I	T	I	3	S
gi|219110583|ref|XP_002177043.1|	predicted protein [Phaeodactylum tricornutum CCAP 1055/1]	UTP21, WDR36	K14554	GO:0044424	3627	C	S	C	S	3	S
gi|219112405|ref|XP_002177954.1|	predicted protein [Phaeodactylum tricornutum CCAP 1055/1]	UTP20	K14772	_	303	A	E	A	E	3	S
gi|219112405|ref|XP_002177954.1|	predicted protein [Phaeodactylum tricornutum CCAP 1055/1]	UTP20	K14772	_	5913	A	K	A	K	3	S
gi|219112405|ref|XP_002177954.1|	predicted protein [Phaeodactylum tricornutum CCAP 1055/1]	UTP20	K14772	_	6852	T	L	T	L	3	S
gi|219112405|ref|XP_002177954.1|	predicted protein [Phaeodactylum tricornutum CCAP 1055/1]	UTP20	K14772	_	7380	T	V	T	V	3	S
gi|219112405|ref|XP_002177954.1|	predicted protein [Phaeodactylum tricornutum CCAP 1055/1]	UTP20	K14772	_	8196	C	A	C	A	3	S
gi|219112405|ref|XP_002177954.1|	predicted protein [Phaeodactylum tricornutum CCAP 1055/1]	UTP20	K14772	_	8223	C	P	C	P	3	S
gi|219112405|ref|XP_002177954.1|	predicted protein [Phaeodactylum tricornutum CCAP 1055/1]	UTP20	K14772	_	8442	C	P	C	P	3	S
gi|224007096|ref|XP_002292508.1|	predicted protein [Thalassiosira pseudonana CCMP1335]	USP9_24	K11840	GO:0016579;GO:0004221;GO:0006511	6600	C	P	C	P	3	S
gi|224007096|ref|XP_002292508.1|	predicted protein [Thalassiosira pseudonana CCMP1335]	USP9_24	K11840	GO:0016579;GO:0004221;GO:0006511	6690	T	F	T	F	3	S
gi|224007096|ref|XP_002292508.1|	predicted protein [Thalassiosira pseudonana CCMP1335]	USP9_24	K11840	GO:0016579;GO:0004221;GO:0006511	9090	G	G	G	G	3	S
gi|397643533|gb|EJK75925.1|	hypothetical protein THAOC_02339 [Thalassiosira oceanica]	USP8, UBP5	K11839	GO:0016787;GO:0016579;GO:0004221;GO:0006508;GO:0006511	4053	G	S	G	S	3	S
gi|397643533|gb|EJK75925.1|	hypothetical protein THAOC_02339 [Thalassiosira oceanica]	USP8, UBP5	K11839	GO:0016787;GO:0016579;GO:0004221;GO:0006508;GO:0006511	4071	C	T	C	T	3	S
gi|397643533|gb|EJK75925.1|	hypothetical protein THAOC_02339 [Thalassiosira oceanica]	USP8, UBP5	K11839	GO:0016787;GO:0016579;GO:0004221;GO:0006508;GO:0006511	4677	A	E	A	E	3	S
gi|397643533|gb|EJK75925.1|	hypothetical protein THAOC_02339 [Thalassiosira oceanica]	USP8, UBP5	K11839	GO:0016787;GO:0016579;GO:0004221;GO:0006508;GO:0006511	5862	A	Y	A	Y	3	S
gi|224002779|ref|XP_002291061.1|	ubiquitin specific protease [Thalassiosira pseudonana CCMP1335]	USP5_13, UBP14	K11836	GO:0008233;GO:0016787;GO:0006508;GO:0070011;GO:0046872	1035	C	A	C	A	3	S
gi|219109702|ref|XP_002176605.1|	predicted protein [Phaeodactylum tricornutum CCAP 1055/1]	USP4_11_15, UBP12	K11835	GO:0016579;GO:0004221;GO:0006511	252	G	R	G	R	3	S
gi|219109702|ref|XP_002176605.1|	predicted protein [Phaeodactylum tricornutum CCAP 1055/1]	USP4_11_15, UBP12	K11835	GO:0016579;GO:0004221;GO:0006511	438	T	F	T	F	3	S
gi|219109702|ref|XP_002176605.1|	predicted protein [Phaeodactylum tricornutum CCAP 1055/1]	USP4_11_15, UBP12	K11835	GO:0016579;GO:0004221;GO:0006511	1524	C	T	C	T	3	S
gi|219109668|ref|XP_002176588.1|	predicted protein [Phaeodactylum tricornutum CCAP 1055/1]	USP2_21	K11833	GO:0016787;GO:0043170	51	A	D	A	D	3	S
gi|219109668|ref|XP_002176588.1|	predicted protein [Phaeodactylum tricornutum CCAP 1055/1]	USP2_21	K11833	GO:0016787;GO:0043170	528	T	I	T	I	3	S
gi|219109668|ref|XP_002176588.1|	predicted protein [Phaeodactylum tricornutum CCAP 1055/1]	USP2_21	K11833	GO:0016787;GO:0043170	1164	A	*	A	*	3	S
gi|219109668|ref|XP_002176588.1|	predicted protein [Phaeodactylum tricornutum CCAP 1055/1]	USP2_21	K11833	GO:0016787;GO:0043170	1374	C	A	C	A	3	S
gi|219109668|ref|XP_002176588.1|	predicted protein [Phaeodactylum tricornutum CCAP 1055/1]	USP2_21	K11833	GO:0016787;GO:0043170	1575	G	G	G	G	3	S
gi|219129779|ref|XP_002185058.1|	predicted protein [Phaeodactylum tricornutum CCAP 1055/1]	UPF2, RENT2	K14327	GO:0003676	3594	C	A	C	A	3	S
gi|219125610|ref|XP_002183069.1|	predicted protein [Phaeodactylum tricornutum CCAP 1055/1]	UNC4	K09328	GO:0050794;GO:0016310;GO:0005515;GO:0004672;GO:0050896;GO:0008152;GO:0007165;GO:0016301;GO:0032550;GO:0009987;GO:0009617;GO:0035639;GO:0051716;GO:0043231;GO:0032555;GO:0006952;GO:0044444;GO:0016772	174	G	G	G	G	3	S
gi|219125610|ref|XP_002183069.1|	predicted protein [Phaeodactylum tricornutum CCAP 1055/1]	UNC4	K09328	GO:0050794;GO:0016310;GO:0005515;GO:0004672;GO:0050896;GO:0008152;GO:0007165;GO:0016301;GO:0032550;GO:0009987;GO:0009617;GO:0035639;GO:0051716;GO:0043231;GO:0032555;GO:0006952;GO:0044444;GO:0016772	207	C	S	C	S	3	S
gi|219125610|ref|XP_002183069.1|	predicted protein [Phaeodactylum tricornutum CCAP 1055/1]	UNC4	K09328	GO:0050794;GO:0016310;GO:0005515;GO:0004672;GO:0050896;GO:0008152;GO:0007165;GO:0016301;GO:0032550;GO:0009987;GO:0009617;GO:0035639;GO:0051716;GO:0043231;GO:0032555;GO:0006952;GO:0044444;GO:0016772	237	C	T	C	T	3	S
gi|219125610|ref|XP_002183069.1|	predicted protein [Phaeodactylum tricornutum CCAP 1055/1]	UNC4	K09328	GO:0050794;GO:0016310;GO:0005515;GO:0004672;GO:0050896;GO:0008152;GO:0007165;GO:0016301;GO:0032550;GO:0009987;GO:0009617;GO:0035639;GO:0051716;GO:0043231;GO:0032555;GO:0006952;GO:0044444;GO:0016772	435	C	T	C	T	3	S
gi|219125610|ref|XP_002183069.1|	predicted protein [Phaeodactylum tricornutum CCAP 1055/1]	UNC4	K09328	GO:0050794;GO:0016310;GO:0005515;GO:0004672;GO:0050896;GO:0008152;GO:0007165;GO:0016301;GO:0032550;GO:0009987;GO:0009617;GO:0035639;GO:0051716;GO:0043231;GO:0032555;GO:0006952;GO:0044444;GO:0016772	618	G	G	G	G	3	S
gi|219125610|ref|XP_002183069.1|	predicted protein [Phaeodactylum tricornutum CCAP 1055/1]	UNC4	K09328	GO:0050794;GO:0016310;GO:0005515;GO:0004672;GO:0050896;GO:0008152;GO:0007165;GO:0016301;GO:0032550;GO:0009987;GO:0009617;GO:0035639;GO:0051716;GO:0043231;GO:0032555;GO:0006952;GO:0044444;GO:0016772	651	G	R	G	R	3	S
gi|219125610|ref|XP_002183069.1|	predicted protein [Phaeodactylum tricornutum CCAP 1055/1]	UNC4	K09328	GO:0050794;GO:0016310;GO:0005515;GO:0004672;GO:0050896;GO:0008152;GO:0007165;GO:0016301;GO:0032550;GO:0009987;GO:0009617;GO:0035639;GO:0051716;GO:0043231;GO:0032555;GO:0006952;GO:0044444;GO:0016772	750	T	L	T	L	3	S
gi|219125610|ref|XP_002183069.1|	predicted protein [Phaeodactylum tricornutum CCAP 1055/1]	UNC4	K09328	GO:0050794;GO:0016310;GO:0005515;GO:0004672;GO:0050896;GO:0008152;GO:0007165;GO:0016301;GO:0032550;GO:0009987;GO:0009617;GO:0035639;GO:0051716;GO:0043231;GO:0032555;GO:0006952;GO:0044444;GO:0016772	771	A	K	A	K	3	S
gi|219125610|ref|XP_002183069.1|	predicted protein [Phaeodactylum tricornutum CCAP 1055/1]	UNC4	K09328	GO:0050794;GO:0016310;GO:0005515;GO:0004672;GO:0050896;GO:0008152;GO:0007165;GO:0016301;GO:0032550;GO:0009987;GO:0009617;GO:0035639;GO:0051716;GO:0043231;GO:0032555;GO:0006952;GO:0044444;GO:0016772	882	G	R	G	R	3	S
gi|219125610|ref|XP_002183069.1|	predicted protein [Phaeodactylum tricornutum CCAP 1055/1]	UNC4	K09328	GO:0050794;GO:0016310;GO:0005515;GO:0004672;GO:0050896;GO:0008152;GO:0007165;GO:0016301;GO:0032550;GO:0009987;GO:0009617;GO:0035639;GO:0051716;GO:0043231;GO:0032555;GO:0006952;GO:0044444;GO:0016772	1074	C	A	C	A	3	S
gi|219125610|ref|XP_002183069.1|	predicted protein [Phaeodactylum tricornutum CCAP 1055/1]	UNC4	K09328	GO:0050794;GO:0016310;GO:0005515;GO:0004672;GO:0050896;GO:0008152;GO:0007165;GO:0016301;GO:0032550;GO:0009987;GO:0009617;GO:0035639;GO:0051716;GO:0043231;GO:0032555;GO:0006952;GO:0044444;GO:0016772	1107	T	L	T	L	3	S
gi|219125610|ref|XP_002183069.1|	predicted protein [Phaeodactylum tricornutum CCAP 1055/1]	UNC4	K09328	GO:0050794;GO:0016310;GO:0005515;GO:0004672;GO:0050896;GO:0008152;GO:0007165;GO:0016301;GO:0032550;GO:0009987;GO:0009617;GO:0035639;GO:0051716;GO:0043231;GO:0032555;GO:0006952;GO:0044444;GO:0016772	1269	A	E	A	E	3	S
gi|219125610|ref|XP_002183069.1|	predicted protein [Phaeodactylum tricornutum CCAP 1055/1]	UNC4	K09328	GO:0050794;GO:0016310;GO:0005515;GO:0004672;GO:0050896;GO:0008152;GO:0007165;GO:0016301;GO:0032550;GO:0009987;GO:0009617;GO:0035639;GO:0051716;GO:0043231;GO:0032555;GO:0006952;GO:0044444;GO:0016772	1278	A	Y	A	Y	3	S
gi|219125610|ref|XP_002183069.1|	predicted protein [Phaeodactylum tricornutum CCAP 1055/1]	UNC4	K09328	GO:0050794;GO:0016310;GO:0005515;GO:0004672;GO:0050896;GO:0008152;GO:0007165;GO:0016301;GO:0032550;GO:0009987;GO:0009617;GO:0035639;GO:0051716;GO:0043231;GO:0032555;GO:0006952;GO:0044444;GO:0016772	1401	T	V	T	V	3	S
gi|219125610|ref|XP_002183069.1|	predicted protein [Phaeodactylum tricornutum CCAP 1055/1]	UNC4	K09328	GO:0050794;GO:0016310;GO:0005515;GO:0004672;GO:0050896;GO:0008152;GO:0007165;GO:0016301;GO:0032550;GO:0009987;GO:0009617;GO:0035639;GO:0051716;GO:0043231;GO:0032555;GO:0006952;GO:0044444;GO:0016772	1455	T	F	T	F	3	S
gi|219125610|ref|XP_002183069.1|	predicted protein [Phaeodactylum tricornutum CCAP 1055/1]	UNC4	K09328	GO:0050794;GO:0016310;GO:0005515;GO:0004672;GO:0050896;GO:0008152;GO:0007165;GO:0016301;GO:0032550;GO:0009987;GO:0009617;GO:0035639;GO:0051716;GO:0043231;GO:0032555;GO:0006952;GO:0044444;GO:0016772	1650	G	G	G	G	3	S
gi|219125610|ref|XP_002183069.1|	predicted protein [Phaeodactylum tricornutum CCAP 1055/1]	UNC4	K09328	GO:0050794;GO:0016310;GO:0005515;GO:0004672;GO:0050896;GO:0008152;GO:0007165;GO:0016301;GO:0032550;GO:0009987;GO:0009617;GO:0035639;GO:0051716;GO:0043231;GO:0032555;GO:0006952;GO:0044444;GO:0016772	1656	G	G	G	G	3	S
gi|219125610|ref|XP_002183069.1|	predicted protein [Phaeodactylum tricornutum CCAP 1055/1]	UNC4	K09328	GO:0050794;GO:0016310;GO:0005515;GO:0004672;GO:0050896;GO:0008152;GO:0007165;GO:0016301;GO:0032550;GO:0009987;GO:0009617;GO:0035639;GO:0051716;GO:0043231;GO:0032555;GO:0006952;GO:0044444;GO:0016772	1758	G	G	G	G	3	S
gi|219125610|ref|XP_002183069.1|	predicted protein [Phaeodactylum tricornutum CCAP 1055/1]	UNC4	K09328	GO:0050794;GO:0016310;GO:0005515;GO:0004672;GO:0050896;GO:0008152;GO:0007165;GO:0016301;GO:0032550;GO:0009987;GO:0009617;GO:0035639;GO:0051716;GO:0043231;GO:0032555;GO:0006952;GO:0044444;GO:0016772	1764	G	G	G	G	3	S
gi|219125610|ref|XP_002183069.1|	predicted protein [Phaeodactylum tricornutum CCAP 1055/1]	UNC4	K09328	GO:0050794;GO:0016310;GO:0005515;GO:0004672;GO:0050896;GO:0008152;GO:0007165;GO:0016301;GO:0032550;GO:0009987;GO:0009617;GO:0035639;GO:0051716;GO:0043231;GO:0032555;GO:0006952;GO:0044444;GO:0016772	1869	T	V	T	V	3	S
gi|219125610|ref|XP_002183069.1|	predicted protein [Phaeodactylum tricornutum CCAP 1055/1]	UNC4	K09328	GO:0050794;GO:0016310;GO:0005515;GO:0004672;GO:0050896;GO:0008152;GO:0007165;GO:0016301;GO:0032550;GO:0009987;GO:0009617;GO:0035639;GO:0051716;GO:0043231;GO:0032555;GO:0006952;GO:0044444;GO:0016772	1974	G	C	G	C	3	S
gi|219125610|ref|XP_002183069.1|	predicted protein [Phaeodactylum tricornutum CCAP 1055/1]	UNC4	K09328	GO:0050794;GO:0016310;GO:0005515;GO:0004672;GO:0050896;GO:0008152;GO:0007165;GO:0016301;GO:0032550;GO:0009987;GO:0009617;GO:0035639;GO:0051716;GO:0043231;GO:0032555;GO:0006952;GO:0044444;GO:0016772	1992	C	P	C	P	3	S
gi|219125610|ref|XP_002183069.1|	predicted protein [Phaeodactylum tricornutum CCAP 1055/1]	UNC4	K09328	GO:0050794;GO:0016310;GO:0005515;GO:0004672;GO:0050896;GO:0008152;GO:0007165;GO:0016301;GO:0032550;GO:0009987;GO:0009617;GO:0035639;GO:0051716;GO:0043231;GO:0032555;GO:0006952;GO:0044444;GO:0016772	1995	A	D	A	D	3	S
gi|219125610|ref|XP_002183069.1|	predicted protein [Phaeodactylum tricornutum CCAP 1055/1]	UNC4	K09328	GO:0050794;GO:0016310;GO:0005515;GO:0004672;GO:0050896;GO:0008152;GO:0007165;GO:0016301;GO:0032550;GO:0009987;GO:0009617;GO:0035639;GO:0051716;GO:0043231;GO:0032555;GO:0006952;GO:0044444;GO:0016772	2007	G	C	G	C	3	S
gi|219125610|ref|XP_002183069.1|	predicted protein [Phaeodactylum tricornutum CCAP 1055/1]	UNC4	K09328	GO:0050794;GO:0016310;GO:0005515;GO:0004672;GO:0050896;GO:0008152;GO:0007165;GO:0016301;GO:0032550;GO:0009987;GO:0009617;GO:0035639;GO:0051716;GO:0043231;GO:0032555;GO:0006952;GO:0044444;GO:0016772	2016	C	T	C	T	3	S
gi|219125610|ref|XP_002183069.1|	predicted protein [Phaeodactylum tricornutum CCAP 1055/1]	UNC4	K09328	GO:0050794;GO:0016310;GO:0005515;GO:0004672;GO:0050896;GO:0008152;GO:0007165;GO:0016301;GO:0032550;GO:0009987;GO:0009617;GO:0035639;GO:0051716;GO:0043231;GO:0032555;GO:0006952;GO:0044444;GO:0016772	2022	C	T	C	T	3	S
gi|219125610|ref|XP_002183069.1|	predicted protein [Phaeodactylum tricornutum CCAP 1055/1]	UNC4	K09328	GO:0050794;GO:0016310;GO:0005515;GO:0004672;GO:0050896;GO:0008152;GO:0007165;GO:0016301;GO:0032550;GO:0009987;GO:0009617;GO:0035639;GO:0051716;GO:0043231;GO:0032555;GO:0006952;GO:0044444;GO:0016772	2028	A	*	A	*	3	S
gi|219120215|ref|XP_002180851.1|	predicted protein [Phaeodactylum tricornutum CCAP 1055/1]	ULK, ATG1	K08269	GO:0008080;GO:0006468;GO:0006508;GO:0005524;GO:0009069;GO:0042967;GO:0004190;GO:0004674	894	T	V	T	V	3	S
gi|219120215|ref|XP_002180851.1|	predicted protein [Phaeodactylum tricornutum CCAP 1055/1]	ULK, ATG1	K08269	GO:0008080;GO:0006468;GO:0006508;GO:0005524;GO:0009069;GO:0042967;GO:0004190;GO:0004674	1920	G	G	G	G	3	S
gi|219118691|ref|XP_002180113.1|	predicted protein [Phaeodactylum tricornutum CCAP 1055/1]	UHRF1, NP95	K10638	GO:0010216;GO:0031100;GO:0002088;GO:0044427;GO:0003677;GO:0008270	1020	C	T	C	T	3	S
gi|219118691|ref|XP_002180113.1|	predicted protein [Phaeodactylum tricornutum CCAP 1055/1]	UHRF1, NP95	K10638	GO:0010216;GO:0031100;GO:0002088;GO:0044427;GO:0003677;GO:0008270	1038	T	V	T	V	3	S
gi|219113223|ref|XP_002186195.1|	UDP-glucose 6-dehydrogenase [Phaeodactylum tricornutum CCAP 1055/1]	UGDH, ugd	K00012	GO:0005982;GO:0005737;GO:0009117;GO:0009749;GO:0016616;GO:0005985;GO:0005488;GO:0009744;GO:0048046;GO:0055114;GO:0005829;GO:0005634;GO:0003979;GO:0051287;GO:0009750;GO:0005618	33	T	V	T	V	3	S
gi|219113223|ref|XP_002186195.1|	UDP-glucose 6-dehydrogenase [Phaeodactylum tricornutum CCAP 1055/1]	UGDH, ugd	K00012	GO:0005982;GO:0005737;GO:0009117;GO:0009749;GO:0016616;GO:0005985;GO:0005488;GO:0009744;GO:0048046;GO:0055114;GO:0005829;GO:0005634;GO:0003979;GO:0051287;GO:0009750;GO:0005618	57	G	C	G	C	3	S
gi|219113223|ref|XP_002186195.1|	UDP-glucose 6-dehydrogenase [Phaeodactylum tricornutum CCAP 1055/1]	UGDH, ugd	K00012	GO:0005982;GO:0005737;GO:0009117;GO:0009749;GO:0016616;GO:0005985;GO:0005488;GO:0009744;GO:0048046;GO:0055114;GO:0005829;GO:0005634;GO:0003979;GO:0051287;GO:0009750;GO:0005618	327	T	I	T	I	3	S
gi|219113223|ref|XP_002186195.1|	UDP-glucose 6-dehydrogenase [Phaeodactylum tricornutum CCAP 1055/1]	UGDH, ugd	K00012	GO:0005982;GO:0005737;GO:0009117;GO:0009749;GO:0016616;GO:0005985;GO:0005488;GO:0009744;GO:0048046;GO:0055114;GO:0005829;GO:0005634;GO:0003979;GO:0051287;GO:0009750;GO:0005618	336	A	K	A	K	3	S
gi|219113223|ref|XP_002186195.1|	UDP-glucose 6-dehydrogenase [Phaeodactylum tricornutum CCAP 1055/1]	UGDH, ugd	K00012	GO:0005982;GO:0005737;GO:0009117;GO:0009749;GO:0016616;GO:0005985;GO:0005488;GO:0009744;GO:0048046;GO:0055114;GO:0005829;GO:0005634;GO:0003979;GO:0051287;GO:0009750;GO:0005618	339	C	S	C	S	3	S
gi|219113223|ref|XP_002186195.1|	UDP-glucose 6-dehydrogenase [Phaeodactylum tricornutum CCAP 1055/1]	UGDH, ugd	K00012	GO:0005982;GO:0005737;GO:0009117;GO:0009749;GO:0016616;GO:0005985;GO:0005488;GO:0009744;GO:0048046;GO:0055114;GO:0005829;GO:0005634;GO:0003979;GO:0051287;GO:0009750;GO:0005618	342	T	V	T	V	3	S
gi|219113223|ref|XP_002186195.1|	UDP-glucose 6-dehydrogenase [Phaeodactylum tricornutum CCAP 1055/1]	UGDH, ugd	K00012	GO:0005982;GO:0005737;GO:0009117;GO:0009749;GO:0016616;GO:0005985;GO:0005488;GO:0009744;GO:0048046;GO:0055114;GO:0005829;GO:0005634;GO:0003979;GO:0051287;GO:0009750;GO:0005618	351	G	R	G	R	3	S
gi|219113223|ref|XP_002186195.1|	UDP-glucose 6-dehydrogenase [Phaeodactylum tricornutum CCAP 1055/1]	UGDH, ugd	K00012	GO:0005982;GO:0005737;GO:0009117;GO:0009749;GO:0016616;GO:0005985;GO:0005488;GO:0009744;GO:0048046;GO:0055114;GO:0005829;GO:0005634;GO:0003979;GO:0051287;GO:0009750;GO:0005618	357	G	C	G	C	3	S
gi|219113223|ref|XP_002186195.1|	UDP-glucose 6-dehydrogenase [Phaeodactylum tricornutum CCAP 1055/1]	UGDH, ugd	K00012	GO:0005982;GO:0005737;GO:0009117;GO:0009749;GO:0016616;GO:0005985;GO:0005488;GO:0009744;GO:0048046;GO:0055114;GO:0005829;GO:0005634;GO:0003979;GO:0051287;GO:0009750;GO:0005618	375	C	S	C	S	3	S
gi|219113223|ref|XP_002186195.1|	UDP-glucose 6-dehydrogenase [Phaeodactylum tricornutum CCAP 1055/1]	UGDH, ugd	K00012	GO:0005982;GO:0005737;GO:0009117;GO:0009749;GO:0016616;GO:0005985;GO:0005488;GO:0009744;GO:0048046;GO:0055114;GO:0005829;GO:0005634;GO:0003979;GO:0051287;GO:0009750;GO:0005618	459	G	C	G	C	3	S
gi|219113223|ref|XP_002186195.1|	UDP-glucose 6-dehydrogenase [Phaeodactylum tricornutum CCAP 1055/1]	UGDH, ugd	K00012	GO:0005982;GO:0005737;GO:0009117;GO:0009749;GO:0016616;GO:0005985;GO:0005488;GO:0009744;GO:0048046;GO:0055114;GO:0005829;GO:0005634;GO:0003979;GO:0051287;GO:0009750;GO:0005618	600	G	R	G	R	3	S
gi|219113223|ref|XP_002186195.1|	UDP-glucose 6-dehydrogenase [Phaeodactylum tricornutum CCAP 1055/1]	UGDH, ugd	K00012	GO:0005982;GO:0005737;GO:0009117;GO:0009749;GO:0016616;GO:0005985;GO:0005488;GO:0009744;GO:0048046;GO:0055114;GO:0005829;GO:0005634;GO:0003979;GO:0051287;GO:0009750;GO:0005618	765	T	I	T	I	3	S
gi|219113223|ref|XP_002186195.1|	UDP-glucose 6-dehydrogenase [Phaeodactylum tricornutum CCAP 1055/1]	UGDH, ugd	K00012	GO:0005982;GO:0005737;GO:0009117;GO:0009749;GO:0016616;GO:0005985;GO:0005488;GO:0009744;GO:0048046;GO:0055114;GO:0005829;GO:0005634;GO:0003979;GO:0051287;GO:0009750;GO:0005618	912	G	G	G	G	3	S
gi|219113223|ref|XP_002186195.1|	UDP-glucose 6-dehydrogenase [Phaeodactylum tricornutum CCAP 1055/1]	UGDH, ugd	K00012	GO:0005982;GO:0005737;GO:0009117;GO:0009749;GO:0016616;GO:0005985;GO:0005488;GO:0009744;GO:0048046;GO:0055114;GO:0005829;GO:0005634;GO:0003979;GO:0051287;GO:0009750;GO:0005618	915	A	H	A	H	3	S
gi|219113223|ref|XP_002186195.1|	UDP-glucose 6-dehydrogenase [Phaeodactylum tricornutum CCAP 1055/1]	UGDH, ugd	K00012	GO:0005982;GO:0005737;GO:0009117;GO:0009749;GO:0016616;GO:0005985;GO:0005488;GO:0009744;GO:0048046;GO:0055114;GO:0005829;GO:0005634;GO:0003979;GO:0051287;GO:0009750;GO:0005618	1062	G	G	G	G	3	S
gi|219113223|ref|XP_002186195.1|	UDP-glucose 6-dehydrogenase [Phaeodactylum tricornutum CCAP 1055/1]	UGDH, ugd	K00012	GO:0005982;GO:0005737;GO:0009117;GO:0009749;GO:0016616;GO:0005985;GO:0005488;GO:0009744;GO:0048046;GO:0055114;GO:0005829;GO:0005634;GO:0003979;GO:0051287;GO:0009750;GO:0005618	1110	A	D	A	D	3	S
gi|494470520|ref|WP_007259998.1|	hypothetical protein [Natronolimnobius innermongolicus]	UBTF	K09273	_	306	G	G	G	G	3	S
gi|224005308|ref|XP_002296305.1|	predicted protein [Thalassiosira pseudonana CCMP1335]	UBR4, ZUBR1	K10691	_	279	C	T	C	T	3	S
gi|224005308|ref|XP_002296305.1|	predicted protein [Thalassiosira pseudonana CCMP1335]	UBR4, ZUBR1	K10691	_	819	C	S	C	S	3	S
gi|224005308|ref|XP_002296305.1|	predicted protein [Thalassiosira pseudonana CCMP1335]	UBR4, ZUBR1	K10691	_	831	A	D	A	D	3	S
gi|224005308|ref|XP_002296305.1|	predicted protein [Thalassiosira pseudonana CCMP1335]	UBR4, ZUBR1	K10691	_	897	C	A	C	A	3	S
gi|224005308|ref|XP_002296305.1|	predicted protein [Thalassiosira pseudonana CCMP1335]	UBR4, ZUBR1	K10691	_	1044	G	R	G	R	3	S
gi|224005308|ref|XP_002296305.1|	predicted protein [Thalassiosira pseudonana CCMP1335]	UBR4, ZUBR1	K10691	_	1686	G	C	G	C	3	S
gi|224005308|ref|XP_002296305.1|	predicted protein [Thalassiosira pseudonana CCMP1335]	UBR4, ZUBR1	K10691	_	1689	C	P	C	P	3	S
gi|224005308|ref|XP_002296305.1|	predicted protein [Thalassiosira pseudonana CCMP1335]	UBR4, ZUBR1	K10691	_	1767	A	E	A	E	3	S
gi|224005308|ref|XP_002296305.1|	predicted protein [Thalassiosira pseudonana CCMP1335]	UBR4, ZUBR1	K10691	_	1866	A	E	A	E	3	S
gi|224005308|ref|XP_002296305.1|	predicted protein [Thalassiosira pseudonana CCMP1335]	UBR4, ZUBR1	K10691	_	2736	C	A	C	A	3	S
gi|224005308|ref|XP_002296305.1|	predicted protein [Thalassiosira pseudonana CCMP1335]	UBR4, ZUBR1	K10691	_	5439	A	N	A	N	3	S
gi|224005308|ref|XP_002296305.1|	predicted protein [Thalassiosira pseudonana CCMP1335]	UBR4, ZUBR1	K10691	_	13656	T	V	T	V	3	S
gi|219128818|ref|XP_002184601.1|	predicted protein [Phaeodactylum tricornutum CCAP 1055/1]	UBR3	K11978	GO:0016567;GO:0008270;GO:0004842	12	C	P	C	P	3	S
gi|219128818|ref|XP_002184601.1|	predicted protein [Phaeodactylum tricornutum CCAP 1055/1]	UBR3	K11978	GO:0016567;GO:0008270;GO:0004842	24	C	A	C	A	3	S
gi|219128818|ref|XP_002184601.1|	predicted protein [Phaeodactylum tricornutum CCAP 1055/1]	UBR3	K11978	GO:0016567;GO:0008270;GO:0004842	69	T	V	T	V	3	S
gi|219128818|ref|XP_002184601.1|	predicted protein [Phaeodactylum tricornutum CCAP 1055/1]	UBR3	K11978	GO:0016567;GO:0008270;GO:0004842	93	C	T	C	T	3	S
gi|219128818|ref|XP_002184601.1|	predicted protein [Phaeodactylum tricornutum CCAP 1055/1]	UBR3	K11978	GO:0016567;GO:0008270;GO:0004842	108	C	T	C	T	3	S
gi|219128818|ref|XP_002184601.1|	predicted protein [Phaeodactylum tricornutum CCAP 1055/1]	UBR3	K11978	GO:0016567;GO:0008270;GO:0004842	189	T	V	T	V	3	S
gi|219128818|ref|XP_002184601.1|	predicted protein [Phaeodactylum tricornutum CCAP 1055/1]	UBR3	K11978	GO:0016567;GO:0008270;GO:0004842	228	G	G	G	G	3	S
gi|219128818|ref|XP_002184601.1|	predicted protein [Phaeodactylum tricornutum CCAP 1055/1]	UBR3	K11978	GO:0016567;GO:0008270;GO:0004842	243	C	A	C	A	3	S
gi|219128818|ref|XP_002184601.1|	predicted protein [Phaeodactylum tricornutum CCAP 1055/1]	UBR3	K11978	GO:0016567;GO:0008270;GO:0004842	261	G	C	G	C	3	S
gi|219128818|ref|XP_002184601.1|	predicted protein [Phaeodactylum tricornutum CCAP 1055/1]	UBR3	K11978	GO:0016567;GO:0008270;GO:0004842	270	T	I	T	I	3	S
gi|219128818|ref|XP_002184601.1|	predicted protein [Phaeodactylum tricornutum CCAP 1055/1]	UBR3	K11978	GO:0016567;GO:0008270;GO:0004842	273	G	C	G	C	3	S
gi|219128818|ref|XP_002184601.1|	predicted protein [Phaeodactylum tricornutum CCAP 1055/1]	UBR3	K11978	GO:0016567;GO:0008270;GO:0004842	276	G	R	G	R	3	S
gi|219128818|ref|XP_002184601.1|	predicted protein [Phaeodactylum tricornutum CCAP 1055/1]	UBR3	K11978	GO:0016567;GO:0008270;GO:0004842	279	C	T	C	T	3	S
gi|219128818|ref|XP_002184601.1|	predicted protein [Phaeodactylum tricornutum CCAP 1055/1]	UBR3	K11978	GO:0016567;GO:0008270;GO:0004842	291	C	T	C	T	3	S
gi|219128818|ref|XP_002184601.1|	predicted protein [Phaeodactylum tricornutum CCAP 1055/1]	UBR3	K11978	GO:0016567;GO:0008270;GO:0004842	294	G	C	G	C	3	S
gi|219128818|ref|XP_002184601.1|	predicted protein [Phaeodactylum tricornutum CCAP 1055/1]	UBR3	K11978	GO:0016567;GO:0008270;GO:0004842	309	T	F	T	F	3	S
gi|219128818|ref|XP_002184601.1|	predicted protein [Phaeodactylum tricornutum CCAP 1055/1]	UBR3	K11978	GO:0016567;GO:0008270;GO:0004842	312	A	N	A	N	3	S
gi|219128818|ref|XP_002184601.1|	predicted protein [Phaeodactylum tricornutum CCAP 1055/1]	UBR3	K11978	GO:0016567;GO:0008270;GO:0004842	315	A	H	A	H	3	S
gi|219128818|ref|XP_002184601.1|	predicted protein [Phaeodactylum tricornutum CCAP 1055/1]	UBR3	K11978	GO:0016567;GO:0008270;GO:0004842	324	A	H	A	H	3	S
gi|219128818|ref|XP_002184601.1|	predicted protein [Phaeodactylum tricornutum CCAP 1055/1]	UBR3	K11978	GO:0016567;GO:0008270;GO:0004842	333	T	L	T	L	3	S
gi|219128818|ref|XP_002184601.1|	predicted protein [Phaeodactylum tricornutum CCAP 1055/1]	UBR3	K11978	GO:0016567;GO:0008270;GO:0004842	510	G	R	G	R	3	S
gi|219128818|ref|XP_002184601.1|	predicted protein [Phaeodactylum tricornutum CCAP 1055/1]	UBR3	K11978	GO:0016567;GO:0008270;GO:0004842	582	C	T	C	T	3	S
gi|219128818|ref|XP_002184601.1|	predicted protein [Phaeodactylum tricornutum CCAP 1055/1]	UBR3	K11978	GO:0016567;GO:0008270;GO:0004842	906	G	R	G	R	3	S
gi|219128818|ref|XP_002184601.1|	predicted protein [Phaeodactylum tricornutum CCAP 1055/1]	UBR3	K11978	GO:0016567;GO:0008270;GO:0004842	912	A	Q	A	Q	3	S
gi|219128818|ref|XP_002184601.1|	predicted protein [Phaeodactylum tricornutum CCAP 1055/1]	UBR3	K11978	GO:0016567;GO:0008270;GO:0004842	927	T	V	T	V	3	S
gi|219128818|ref|XP_002184601.1|	predicted protein [Phaeodactylum tricornutum CCAP 1055/1]	UBR3	K11978	GO:0016567;GO:0008270;GO:0004842	1056	T	I	T	I	3	S
gi|219128818|ref|XP_002184601.1|	predicted protein [Phaeodactylum tricornutum CCAP 1055/1]	UBR3	K11978	GO:0016567;GO:0008270;GO:0004842	1095	C	S	C	S	3	S
gi|219128818|ref|XP_002184601.1|	predicted protein [Phaeodactylum tricornutum CCAP 1055/1]	UBR3	K11978	GO:0016567;GO:0008270;GO:0004842	1380	C	S	C	S	3	S
gi|219128818|ref|XP_002184601.1|	predicted protein [Phaeodactylum tricornutum CCAP 1055/1]	UBR3	K11978	GO:0016567;GO:0008270;GO:0004842	1410	G	C	G	C	3	S
gi|219128818|ref|XP_002184601.1|	predicted protein [Phaeodactylum tricornutum CCAP 1055/1]	UBR3	K11978	GO:0016567;GO:0008270;GO:0004842	1425	T	F	T	F	3	S
gi|219128818|ref|XP_002184601.1|	predicted protein [Phaeodactylum tricornutum CCAP 1055/1]	UBR3	K11978	GO:0016567;GO:0008270;GO:0004842	1488	C	P	C	P	3	S
gi|219128818|ref|XP_002184601.1|	predicted protein [Phaeodactylum tricornutum CCAP 1055/1]	UBR3	K11978	GO:0016567;GO:0008270;GO:0004842	1569	C	S	C	S	3	S
gi|219128818|ref|XP_002184601.1|	predicted protein [Phaeodactylum tricornutum CCAP 1055/1]	UBR3	K11978	GO:0016567;GO:0008270;GO:0004842	1827	C	T	C	T	3	S
gi|219128818|ref|XP_002184601.1|	predicted protein [Phaeodactylum tricornutum CCAP 1055/1]	UBR3	K11978	GO:0016567;GO:0008270;GO:0004842	1830	C	A	C	A	3	S
gi|219128818|ref|XP_002184601.1|	predicted protein [Phaeodactylum tricornutum CCAP 1055/1]	UBR3	K11978	GO:0016567;GO:0008270;GO:0004842	1893	A	E	A	E	3	S
gi|219128818|ref|XP_002184601.1|	predicted protein [Phaeodactylum tricornutum CCAP 1055/1]	UBR3	K11978	GO:0016567;GO:0008270;GO:0004842	2163	T	L	T	L	3	S
gi|219128818|ref|XP_002184601.1|	predicted protein [Phaeodactylum tricornutum CCAP 1055/1]	UBR3	K11978	GO:0016567;GO:0008270;GO:0004842	2253	C	S	C	S	3	S
gi|219128818|ref|XP_002184601.1|	predicted protein [Phaeodactylum tricornutum CCAP 1055/1]	UBR3	K11978	GO:0016567;GO:0008270;GO:0004842	2340	T	I	T	I	3	S
gi|219128818|ref|XP_002184601.1|	predicted protein [Phaeodactylum tricornutum CCAP 1055/1]	UBR3	K11978	GO:0016567;GO:0008270;GO:0004842	2487	A	E	A	E	3	S
gi|219128818|ref|XP_002184601.1|	predicted protein [Phaeodactylum tricornutum CCAP 1055/1]	UBR3	K11978	GO:0016567;GO:0008270;GO:0004842	2583	A	N	A	N	3	S
gi|219128818|ref|XP_002184601.1|	predicted protein [Phaeodactylum tricornutum CCAP 1055/1]	UBR3	K11978	GO:0016567;GO:0008270;GO:0004842	2646	C	S	C	S	3	S
gi|219128818|ref|XP_002184601.1|	predicted protein [Phaeodactylum tricornutum CCAP 1055/1]	UBR3	K11978	GO:0016567;GO:0008270;GO:0004842	2682	A	K	A	K	3	S
gi|219128818|ref|XP_002184601.1|	predicted protein [Phaeodactylum tricornutum CCAP 1055/1]	UBR3	K11978	GO:0016567;GO:0008270;GO:0004842	2754	C	A	C	A	3	S
gi|219128818|ref|XP_002184601.1|	predicted protein [Phaeodactylum tricornutum CCAP 1055/1]	UBR3	K11978	GO:0016567;GO:0008270;GO:0004842	2757	T	L	T	L	3	S
gi|219128818|ref|XP_002184601.1|	predicted protein [Phaeodactylum tricornutum CCAP 1055/1]	UBR3	K11978	GO:0016567;GO:0008270;GO:0004842	2769	C	T	C	T	3	S
gi|219128818|ref|XP_002184601.1|	predicted protein [Phaeodactylum tricornutum CCAP 1055/1]	UBR3	K11978	GO:0016567;GO:0008270;GO:0004842	2823	G	R	G	R	3	S
gi|219128818|ref|XP_002184601.1|	predicted protein [Phaeodactylum tricornutum CCAP 1055/1]	UBR3	K11978	GO:0016567;GO:0008270;GO:0004842	2835	A	Y	A	Y	3	S
gi|219128818|ref|XP_002184601.1|	predicted protein [Phaeodactylum tricornutum CCAP 1055/1]	UBR3	K11978	GO:0016567;GO:0008270;GO:0004842	3108	C	A	C	A	3	S
gi|219128818|ref|XP_002184601.1|	predicted protein [Phaeodactylum tricornutum CCAP 1055/1]	UBR3	K11978	GO:0016567;GO:0008270;GO:0004842	3153	C	T	C	T	3	S
gi|219128818|ref|XP_002184601.1|	predicted protein [Phaeodactylum tricornutum CCAP 1055/1]	UBR3	K11978	GO:0016567;GO:0008270;GO:0004842	3222	G	G	G	G	3	S
gi|219128818|ref|XP_002184601.1|	predicted protein [Phaeodactylum tricornutum CCAP 1055/1]	UBR3	K11978	GO:0016567;GO:0008270;GO:0004842	3234	A	K	A	K	3	S
gi|219128818|ref|XP_002184601.1|	predicted protein [Phaeodactylum tricornutum CCAP 1055/1]	UBR3	K11978	GO:0016567;GO:0008270;GO:0004842	3243	G	R	G	R	3	S
gi|219128818|ref|XP_002184601.1|	predicted protein [Phaeodactylum tricornutum CCAP 1055/1]	UBR3	K11978	GO:0016567;GO:0008270;GO:0004842	3273	C	T	C	T	3	S
gi|219128818|ref|XP_002184601.1|	predicted protein [Phaeodactylum tricornutum CCAP 1055/1]	UBR3	K11978	GO:0016567;GO:0008270;GO:0004842	3288	G	G	G	G	3	S
gi|219128818|ref|XP_002184601.1|	predicted protein [Phaeodactylum tricornutum CCAP 1055/1]	UBR3	K11978	GO:0016567;GO:0008270;GO:0004842	3375	T	F	T	F	3	S
gi|219128818|ref|XP_002184601.1|	predicted protein [Phaeodactylum tricornutum CCAP 1055/1]	UBR3	K11978	GO:0016567;GO:0008270;GO:0004842	3378	T	F	T	F	3	S
gi|219128818|ref|XP_002184601.1|	predicted protein [Phaeodactylum tricornutum CCAP 1055/1]	UBR3	K11978	GO:0016567;GO:0008270;GO:0004842	3444	C	P	C	P	3	S
gi|219128818|ref|XP_002184601.1|	predicted protein [Phaeodactylum tricornutum CCAP 1055/1]	UBR3	K11978	GO:0016567;GO:0008270;GO:0004842	3516	C	T	C	T	3	S
gi|219128818|ref|XP_002184601.1|	predicted protein [Phaeodactylum tricornutum CCAP 1055/1]	UBR3	K11978	GO:0016567;GO:0008270;GO:0004842	3555	C	S	C	S	3	S
gi|219128818|ref|XP_002184601.1|	predicted protein [Phaeodactylum tricornutum CCAP 1055/1]	UBR3	K11978	GO:0016567;GO:0008270;GO:0004842	3621	T	L	T	L	3	S
gi|219128818|ref|XP_002184601.1|	predicted protein [Phaeodactylum tricornutum CCAP 1055/1]	UBR3	K11978	GO:0016567;GO:0008270;GO:0004842	3702	G	S	G	S	3	S
gi|219128818|ref|XP_002184601.1|	predicted protein [Phaeodactylum tricornutum CCAP 1055/1]	UBR3	K11978	GO:0016567;GO:0008270;GO:0004842	3759	A	E	A	E	3	S
gi|219128818|ref|XP_002184601.1|	predicted protein [Phaeodactylum tricornutum CCAP 1055/1]	UBR3	K11978	GO:0016567;GO:0008270;GO:0004842	3786	A	N	A	N	3	S
gi|219128818|ref|XP_002184601.1|	predicted protein [Phaeodactylum tricornutum CCAP 1055/1]	UBR3	K11978	GO:0016567;GO:0008270;GO:0004842	3801	T	F	T	F	3	S
gi|219128818|ref|XP_002184601.1|	predicted protein [Phaeodactylum tricornutum CCAP 1055/1]	UBR3	K11978	GO:0016567;GO:0008270;GO:0004842	3846	A	E	A	E	3	S
gi|219128818|ref|XP_002184601.1|	predicted protein [Phaeodactylum tricornutum CCAP 1055/1]	UBR3	K11978	GO:0016567;GO:0008270;GO:0004842	3897	T	V	T	V	3	S
gi|219128818|ref|XP_002184601.1|	predicted protein [Phaeodactylum tricornutum CCAP 1055/1]	UBR3	K11978	GO:0016567;GO:0008270;GO:0004842	3930	A	Q	A	Q	3	S
gi|219128818|ref|XP_002184601.1|	predicted protein [Phaeodactylum tricornutum CCAP 1055/1]	UBR3	K11978	GO:0016567;GO:0008270;GO:0004842	3942	C	S	C	S	3	S
gi|219128818|ref|XP_002184601.1|	predicted protein [Phaeodactylum tricornutum CCAP 1055/1]	UBR3	K11978	GO:0016567;GO:0008270;GO:0004842	3975	G	R	G	R	3	S
gi|219128818|ref|XP_002184601.1|	predicted protein [Phaeodactylum tricornutum CCAP 1055/1]	UBR3	K11978	GO:0016567;GO:0008270;GO:0004842	4005	A	E	A	E	3	S
gi|219128818|ref|XP_002184601.1|	predicted protein [Phaeodactylum tricornutum CCAP 1055/1]	UBR3	K11978	GO:0016567;GO:0008270;GO:0004842	4020	A	E	A	E	3	S
gi|219128818|ref|XP_002184601.1|	predicted protein [Phaeodactylum tricornutum CCAP 1055/1]	UBR3	K11978	GO:0016567;GO:0008270;GO:0004842	4080	C	T	C	T	3	S
gi|219128818|ref|XP_002184601.1|	predicted protein [Phaeodactylum tricornutum CCAP 1055/1]	UBR3	K11978	GO:0016567;GO:0008270;GO:0004842	4155	A	Q	A	Q	3	S
gi|219128818|ref|XP_002184601.1|	predicted protein [Phaeodactylum tricornutum CCAP 1055/1]	UBR3	K11978	GO:0016567;GO:0008270;GO:0004842	4170	G	C	G	C	3	S
gi|219128818|ref|XP_002184601.1|	predicted protein [Phaeodactylum tricornutum CCAP 1055/1]	UBR3	K11978	GO:0016567;GO:0008270;GO:0004842	4257	G	R	G	R	3	S
gi|219128818|ref|XP_002184601.1|	predicted protein [Phaeodactylum tricornutum CCAP 1055/1]	UBR3	K11978	GO:0016567;GO:0008270;GO:0004842	4308	G	C	G	C	3	S
gi|219128818|ref|XP_002184601.1|	predicted protein [Phaeodactylum tricornutum CCAP 1055/1]	UBR3	K11978	GO:0016567;GO:0008270;GO:0004842	4377	A	D	A	D	3	S
gi|219128818|ref|XP_002184601.1|	predicted protein [Phaeodactylum tricornutum CCAP 1055/1]	UBR3	K11978	GO:0016567;GO:0008270;GO:0004842	4395	A	K	A	K	3	S
gi|219128818|ref|XP_002184601.1|	predicted protein [Phaeodactylum tricornutum CCAP 1055/1]	UBR3	K11978	GO:0016567;GO:0008270;GO:0004842	4458	T	L	T	L	3	S
gi|219128818|ref|XP_002184601.1|	predicted protein [Phaeodactylum tricornutum CCAP 1055/1]	UBR3	K11978	GO:0016567;GO:0008270;GO:0004842	4467	C	P	C	P	3	S
gi|219128818|ref|XP_002184601.1|	predicted protein [Phaeodactylum tricornutum CCAP 1055/1]	UBR3	K11978	GO:0016567;GO:0008270;GO:0004842	4557	A	*	A	*	3	S
gi|219128818|ref|XP_002184601.1|	predicted protein [Phaeodactylum tricornutum CCAP 1055/1]	UBR3	K11978	GO:0016567;GO:0008270;GO:0004842	4590	C	S	C	S	3	S
gi|219128818|ref|XP_002184601.1|	predicted protein [Phaeodactylum tricornutum CCAP 1055/1]	UBR3	K11978	GO:0016567;GO:0008270;GO:0004842	4611	A	E	A	E	3	S
gi|219128818|ref|XP_002184601.1|	predicted protein [Phaeodactylum tricornutum CCAP 1055/1]	UBR3	K11978	GO:0016567;GO:0008270;GO:0004842	4632	A	*	A	*	3	S
gi|219128818|ref|XP_002184601.1|	predicted protein [Phaeodactylum tricornutum CCAP 1055/1]	UBR3	K11978	GO:0016567;GO:0008270;GO:0004842	4653	C	A	C	A	3	S
gi|219128818|ref|XP_002184601.1|	predicted protein [Phaeodactylum tricornutum CCAP 1055/1]	UBR3	K11978	GO:0016567;GO:0008270;GO:0004842	4656	A	Q	A	Q	3	S
gi|219128818|ref|XP_002184601.1|	predicted protein [Phaeodactylum tricornutum CCAP 1055/1]	UBR3	K11978	GO:0016567;GO:0008270;GO:0004842	4734	A	Q	A	Q	3	S
gi|219128818|ref|XP_002184601.1|	predicted protein [Phaeodactylum tricornutum CCAP 1055/1]	UBR3	K11978	GO:0016567;GO:0008270;GO:0004842	4839	T	L	T	L	3	S
gi|219128818|ref|XP_002184601.1|	predicted protein [Phaeodactylum tricornutum CCAP 1055/1]	UBR3	K11978	GO:0016567;GO:0008270;GO:0004842	4890	A	K	A	K	3	S
gi|219128818|ref|XP_002184601.1|	predicted protein [Phaeodactylum tricornutum CCAP 1055/1]	UBR3	K11978	GO:0016567;GO:0008270;GO:0004842	4893	T	L	T	L	3	S
gi|219128818|ref|XP_002184601.1|	predicted protein [Phaeodactylum tricornutum CCAP 1055/1]	UBR3	K11978	GO:0016567;GO:0008270;GO:0004842	4896	G	R	G	R	3	S
gi|219128818|ref|XP_002184601.1|	predicted protein [Phaeodactylum tricornutum CCAP 1055/1]	UBR3	K11978	GO:0016567;GO:0008270;GO:0004842	4926	A	K	A	K	3	S
gi|219128818|ref|XP_002184601.1|	predicted protein [Phaeodactylum tricornutum CCAP 1055/1]	UBR3	K11978	GO:0016567;GO:0008270;GO:0004842	4935	T	V	T	V	3	S
gi|219128818|ref|XP_002184601.1|	predicted protein [Phaeodactylum tricornutum CCAP 1055/1]	UBR3	K11978	GO:0016567;GO:0008270;GO:0004842	4941	T	F	T	F	3	S
gi|219128818|ref|XP_002184601.1|	predicted protein [Phaeodactylum tricornutum CCAP 1055/1]	UBR3	K11978	GO:0016567;GO:0008270;GO:0004842	4968	C	S	C	S	3	S
gi|219128818|ref|XP_002184601.1|	predicted protein [Phaeodactylum tricornutum CCAP 1055/1]	UBR3	K11978	GO:0016567;GO:0008270;GO:0004842	4977	G	S	G	S	3	S
gi|219128818|ref|XP_002184601.1|	predicted protein [Phaeodactylum tricornutum CCAP 1055/1]	UBR3	K11978	GO:0016567;GO:0008270;GO:0004842	4980	A	Y	A	Y	3	S
gi|219128818|ref|XP_002184601.1|	predicted protein [Phaeodactylum tricornutum CCAP 1055/1]	UBR3	K11978	GO:0016567;GO:0008270;GO:0004842	5025	A	E	A	E	3	S
gi|219128818|ref|XP_002184601.1|	predicted protein [Phaeodactylum tricornutum CCAP 1055/1]	UBR3	K11978	GO:0016567;GO:0008270;GO:0004842	5046	A	Q	A	Q	3	S
gi|219128818|ref|XP_002184601.1|	predicted protein [Phaeodactylum tricornutum CCAP 1055/1]	UBR3	K11978	GO:0016567;GO:0008270;GO:0004842	5052	G	R	G	R	3	S
gi|219128818|ref|XP_002184601.1|	predicted protein [Phaeodactylum tricornutum CCAP 1055/1]	UBR3	K11978	GO:0016567;GO:0008270;GO:0004842	5055	G	C	G	C	3	S
gi|219128818|ref|XP_002184601.1|	predicted protein [Phaeodactylum tricornutum CCAP 1055/1]	UBR3	K11978	GO:0016567;GO:0008270;GO:0004842	5085	C	P	C	P	3	S
gi|219128818|ref|XP_002184601.1|	predicted protein [Phaeodactylum tricornutum CCAP 1055/1]	UBR3	K11978	GO:0016567;GO:0008270;GO:0004842	5292	A	D	A	D	3	S
gi|219128818|ref|XP_002184601.1|	predicted protein [Phaeodactylum tricornutum CCAP 1055/1]	UBR3	K11978	GO:0016567;GO:0008270;GO:0004842	5325	C	T	C	T	3	S
gi|219128818|ref|XP_002184601.1|	predicted protein [Phaeodactylum tricornutum CCAP 1055/1]	UBR3	K11978	GO:0016567;GO:0008270;GO:0004842	5385	C	S	C	S	3	S
gi|219128818|ref|XP_002184601.1|	predicted protein [Phaeodactylum tricornutum CCAP 1055/1]	UBR3	K11978	GO:0016567;GO:0008270;GO:0004842	5421	A	N	A	N	3	S
gi|219128818|ref|XP_002184601.1|	predicted protein [Phaeodactylum tricornutum CCAP 1055/1]	UBR3	K11978	GO:0016567;GO:0008270;GO:0004842	5739	G	G	G	G	3	S
gi|219128818|ref|XP_002184601.1|	predicted protein [Phaeodactylum tricornutum CCAP 1055/1]	UBR3	K11978	GO:0016567;GO:0008270;GO:0004842	5979	C	S	C	S	3	S
gi|223999061|ref|XP_002289203.1|	predicted protein [Thalassiosira pseudonana CCMP1335]	UBQLN, DSK2	K04523	_	102	C	P	C	P	3	S
gi|223999061|ref|XP_002289203.1|	predicted protein [Thalassiosira pseudonana CCMP1335]	UBQLN, DSK2	K04523	_	171	C	P	C	P	3	S
gi|223999061|ref|XP_002289203.1|	predicted protein [Thalassiosira pseudonana CCMP1335]	UBQLN, DSK2	K04523	_	366	C	P	C	P	3	S
gi|223999061|ref|XP_002289203.1|	predicted protein [Thalassiosira pseudonana CCMP1335]	UBQLN, DSK2	K04523	_	438	A	Q	A	Q	3	S
gi|223999061|ref|XP_002289203.1|	predicted protein [Thalassiosira pseudonana CCMP1335]	UBQLN, DSK2	K04523	_	462	A	Q	A	Q	3	S
gi|223999061|ref|XP_002289203.1|	predicted protein [Thalassiosira pseudonana CCMP1335]	UBQLN, DSK2	K04523	_	738	A	E	A	E	3	S
gi|219116280|ref|XP_002178935.1|	sumo-activating enzyme 2 [Phaeodactylum tricornutum CCAP 1055/1]	UBLE1B, SAE2, UBA2	K10685	GO:0008152;GO:0003824;GO:0000166	390	A	N	A	N	3	S
gi|219118650|ref|XP_002180093.1|	predicted protein [Phaeodactylum tricornutum CCAP 1055/1]	UBE4B, UFD2	K10597	GO:0000151;GO:0016567;GO:0034450;GO:0006511;GO:0004842	273	C	A	C	A	3	S
gi|219118650|ref|XP_002180093.1|	predicted protein [Phaeodactylum tricornutum CCAP 1055/1]	UBE4B, UFD2	K10597	GO:0000151;GO:0016567;GO:0034450;GO:0006511;GO:0004842	285	A	K	A	K	3	S
gi|219118650|ref|XP_002180093.1|	predicted protein [Phaeodactylum tricornutum CCAP 1055/1]	UBE4B, UFD2	K10597	GO:0000151;GO:0016567;GO:0034450;GO:0006511;GO:0004842	300	A	Q	A	Q	3	S
gi|219118650|ref|XP_002180093.1|	predicted protein [Phaeodactylum tricornutum CCAP 1055/1]	UBE4B, UFD2	K10597	GO:0000151;GO:0016567;GO:0034450;GO:0006511;GO:0004842	312	C	P	C	P	3	S
gi|219118650|ref|XP_002180093.1|	predicted protein [Phaeodactylum tricornutum CCAP 1055/1]	UBE4B, UFD2	K10597	GO:0000151;GO:0016567;GO:0034450;GO:0006511;GO:0004842	318	C	S	C	S	3	S
gi|219118650|ref|XP_002180093.1|	predicted protein [Phaeodactylum tricornutum CCAP 1055/1]	UBE4B, UFD2	K10597	GO:0000151;GO:0016567;GO:0034450;GO:0006511;GO:0004842	327	C	P	C	P	3	S
gi|219118650|ref|XP_002180093.1|	predicted protein [Phaeodactylum tricornutum CCAP 1055/1]	UBE4B, UFD2	K10597	GO:0000151;GO:0016567;GO:0034450;GO:0006511;GO:0004842	375	A	K	A	K	3	S
gi|219118650|ref|XP_002180093.1|	predicted protein [Phaeodactylum tricornutum CCAP 1055/1]	UBE4B, UFD2	K10597	GO:0000151;GO:0016567;GO:0034450;GO:0006511;GO:0004842	378	A	K	A	K	3	S
gi|219118650|ref|XP_002180093.1|	predicted protein [Phaeodactylum tricornutum CCAP 1055/1]	UBE4B, UFD2	K10597	GO:0000151;GO:0016567;GO:0034450;GO:0006511;GO:0004842	423	A	N	A	N	3	S
gi|219118650|ref|XP_002180093.1|	predicted protein [Phaeodactylum tricornutum CCAP 1055/1]	UBE4B, UFD2	K10597	GO:0000151;GO:0016567;GO:0034450;GO:0006511;GO:0004842	447	G	G	G	G	3	S
gi|219118650|ref|XP_002180093.1|	predicted protein [Phaeodactylum tricornutum CCAP 1055/1]	UBE4B, UFD2	K10597	GO:0000151;GO:0016567;GO:0034450;GO:0006511;GO:0004842	477	C	T	C	T	3	S
gi|219118650|ref|XP_002180093.1|	predicted protein [Phaeodactylum tricornutum CCAP 1055/1]	UBE4B, UFD2	K10597	GO:0000151;GO:0016567;GO:0034450;GO:0006511;GO:0004842	495	C	P	C	P	3	S
gi|219118650|ref|XP_002180093.1|	predicted protein [Phaeodactylum tricornutum CCAP 1055/1]	UBE4B, UFD2	K10597	GO:0000151;GO:0016567;GO:0034450;GO:0006511;GO:0004842	498	C	A	C	A	3	S
gi|219118650|ref|XP_002180093.1|	predicted protein [Phaeodactylum tricornutum CCAP 1055/1]	UBE4B, UFD2	K10597	GO:0000151;GO:0016567;GO:0034450;GO:0006511;GO:0004842	501	A	D	A	D	3	S
gi|219118650|ref|XP_002180093.1|	predicted protein [Phaeodactylum tricornutum CCAP 1055/1]	UBE4B, UFD2	K10597	GO:0000151;GO:0016567;GO:0034450;GO:0006511;GO:0004842	537	C	P	C	P	3	S
gi|219118650|ref|XP_002180093.1|	predicted protein [Phaeodactylum tricornutum CCAP 1055/1]	UBE4B, UFD2	K10597	GO:0000151;GO:0016567;GO:0034450;GO:0006511;GO:0004842	636	T	L	T	L	3	S
gi|219118650|ref|XP_002180093.1|	predicted protein [Phaeodactylum tricornutum CCAP 1055/1]	UBE4B, UFD2	K10597	GO:0000151;GO:0016567;GO:0034450;GO:0006511;GO:0004842	663	C	A	C	A	3	S
gi|219118650|ref|XP_002180093.1|	predicted protein [Phaeodactylum tricornutum CCAP 1055/1]	UBE4B, UFD2	K10597	GO:0000151;GO:0016567;GO:0034450;GO:0006511;GO:0004842	1149	A	E	A	E	3	S
gi|219118650|ref|XP_002180093.1|	predicted protein [Phaeodactylum tricornutum CCAP 1055/1]	UBE4B, UFD2	K10597	GO:0000151;GO:0016567;GO:0034450;GO:0006511;GO:0004842	1389	G	G	G	G	3	S
gi|219118650|ref|XP_002180093.1|	predicted protein [Phaeodactylum tricornutum CCAP 1055/1]	UBE4B, UFD2	K10597	GO:0000151;GO:0016567;GO:0034450;GO:0006511;GO:0004842	1395	C	A	C	A	3	S
gi|219118650|ref|XP_002180093.1|	predicted protein [Phaeodactylum tricornutum CCAP 1055/1]	UBE4B, UFD2	K10597	GO:0000151;GO:0016567;GO:0034450;GO:0006511;GO:0004842	1428	C	S	C	S	3	S
gi|219118650|ref|XP_002180093.1|	predicted protein [Phaeodactylum tricornutum CCAP 1055/1]	UBE4B, UFD2	K10597	GO:0000151;GO:0016567;GO:0034450;GO:0006511;GO:0004842	1437	T	L	T	L	3	S
gi|219118650|ref|XP_002180093.1|	predicted protein [Phaeodactylum tricornutum CCAP 1055/1]	UBE4B, UFD2	K10597	GO:0000151;GO:0016567;GO:0034450;GO:0006511;GO:0004842	1566	G	G	G	G	3	S
gi|219118650|ref|XP_002180093.1|	predicted protein [Phaeodactylum tricornutum CCAP 1055/1]	UBE4B, UFD2	K10597	GO:0000151;GO:0016567;GO:0034450;GO:0006511;GO:0004842	1569	A	D	A	D	3	S
gi|219118650|ref|XP_002180093.1|	predicted protein [Phaeodactylum tricornutum CCAP 1055/1]	UBE4B, UFD2	K10597	GO:0000151;GO:0016567;GO:0034450;GO:0006511;GO:0004842	1758	C	S	C	S	3	S
gi|219118650|ref|XP_002180093.1|	predicted protein [Phaeodactylum tricornutum CCAP 1055/1]	UBE4B, UFD2	K10597	GO:0000151;GO:0016567;GO:0034450;GO:0006511;GO:0004842	1905	T	L	T	L	3	S
gi|223994281|ref|XP_002286824.1|	hypothetical protein THAPSDRAFT_268040 [Thalassiosira pseudonana CCMP1335]	UBE3C	K10589	GO:0005622;GO:0016567;GO:0004842	1833	C	S	C	S	3	S
gi|223994281|ref|XP_002286824.1|	hypothetical protein THAPSDRAFT_268040 [Thalassiosira pseudonana CCMP1335]	UBE3C	K10589	GO:0005622;GO:0016567;GO:0004842	2433	T	V	T	V	3	S
gi|223994281|ref|XP_002286824.1|	hypothetical protein THAPSDRAFT_268040 [Thalassiosira pseudonana CCMP1335]	UBE3C	K10589	GO:0005622;GO:0016567;GO:0004842	2520	T	L	T	L	3	S
gi|223994281|ref|XP_002286824.1|	hypothetical protein THAPSDRAFT_268040 [Thalassiosira pseudonana CCMP1335]	UBE3C	K10589	GO:0005622;GO:0016567;GO:0004842	2559	C	T	C	T	3	S
gi|223994281|ref|XP_002286824.1|	hypothetical protein THAPSDRAFT_268040 [Thalassiosira pseudonana CCMP1335]	UBE3C	K10589	GO:0005622;GO:0016567;GO:0004842	2562	C	A	C	A	3	S
gi|223994281|ref|XP_002286824.1|	hypothetical protein THAPSDRAFT_268040 [Thalassiosira pseudonana CCMP1335]	UBE3C	K10589	GO:0005622;GO:0016567;GO:0004842	2634	G	R	G	R	3	S
gi|223994281|ref|XP_002286824.1|	hypothetical protein THAPSDRAFT_268040 [Thalassiosira pseudonana CCMP1335]	UBE3C	K10589	GO:0005622;GO:0016567;GO:0004842	2703	A	D	A	D	3	S
gi|219126625|ref|XP_002183553.1|	predicted protein [Phaeodactylum tricornutum CCAP 1055/1]	UBE3A, E6AP	K10587	GO:0005622;GO:0016567;GO:0004842	120	A	Q	A	Q	3	S
gi|219126625|ref|XP_002183553.1|	predicted protein [Phaeodactylum tricornutum CCAP 1055/1]	UBE3A, E6AP	K10587	GO:0005622;GO:0016567;GO:0004842	156	A	N	A	N	3	S
gi|219126625|ref|XP_002183553.1|	predicted protein [Phaeodactylum tricornutum CCAP 1055/1]	UBE3A, E6AP	K10587	GO:0005622;GO:0016567;GO:0004842	171	C	T	C	T	3	S
gi|219126625|ref|XP_002183553.1|	predicted protein [Phaeodactylum tricornutum CCAP 1055/1]	UBE3A, E6AP	K10587	GO:0005622;GO:0016567;GO:0004842	189	A	Q	A	Q	3	S
gi|219126625|ref|XP_002183553.1|	predicted protein [Phaeodactylum tricornutum CCAP 1055/1]	UBE3A, E6AP	K10587	GO:0005622;GO:0016567;GO:0004842	327	A	N	A	N	3	S
gi|219126625|ref|XP_002183553.1|	predicted protein [Phaeodactylum tricornutum CCAP 1055/1]	UBE3A, E6AP	K10587	GO:0005622;GO:0016567;GO:0004842	333	A	N	A	N	3	S
gi|219126625|ref|XP_002183553.1|	predicted protein [Phaeodactylum tricornutum CCAP 1055/1]	UBE3A, E6AP	K10587	GO:0005622;GO:0016567;GO:0004842	336	A	N	A	N	3	S
gi|219126625|ref|XP_002183553.1|	predicted protein [Phaeodactylum tricornutum CCAP 1055/1]	UBE3A, E6AP	K10587	GO:0005622;GO:0016567;GO:0004842	360	C	S	C	S	3	S
gi|219126625|ref|XP_002183553.1|	predicted protein [Phaeodactylum tricornutum CCAP 1055/1]	UBE3A, E6AP	K10587	GO:0005622;GO:0016567;GO:0004842	447	G	R	G	R	3	S
gi|219126625|ref|XP_002183553.1|	predicted protein [Phaeodactylum tricornutum CCAP 1055/1]	UBE3A, E6AP	K10587	GO:0005622;GO:0016567;GO:0004842	459	G	G	G	G	3	S
gi|219126625|ref|XP_002183553.1|	predicted protein [Phaeodactylum tricornutum CCAP 1055/1]	UBE3A, E6AP	K10587	GO:0005622;GO:0016567;GO:0004842	483	C	T	C	T	3	S
gi|219126625|ref|XP_002183553.1|	predicted protein [Phaeodactylum tricornutum CCAP 1055/1]	UBE3A, E6AP	K10587	GO:0005622;GO:0016567;GO:0004842	531	C	T	C	T	3	S
gi|219126625|ref|XP_002183553.1|	predicted protein [Phaeodactylum tricornutum CCAP 1055/1]	UBE3A, E6AP	K10587	GO:0005622;GO:0016567;GO:0004842	537	C	A	C	A	3	S
gi|219126625|ref|XP_002183553.1|	predicted protein [Phaeodactylum tricornutum CCAP 1055/1]	UBE3A, E6AP	K10587	GO:0005622;GO:0016567;GO:0004842	546	C	S	C	S	3	S
gi|219126625|ref|XP_002183553.1|	predicted protein [Phaeodactylum tricornutum CCAP 1055/1]	UBE3A, E6AP	K10587	GO:0005622;GO:0016567;GO:0004842	561	C	S	C	S	3	S
gi|219126625|ref|XP_002183553.1|	predicted protein [Phaeodactylum tricornutum CCAP 1055/1]	UBE3A, E6AP	K10587	GO:0005622;GO:0016567;GO:0004842	651	G	G	G	G	3	S
gi|219126625|ref|XP_002183553.1|	predicted protein [Phaeodactylum tricornutum CCAP 1055/1]	UBE3A, E6AP	K10587	GO:0005622;GO:0016567;GO:0004842	660	C	S	C	S	3	S
gi|219126625|ref|XP_002183553.1|	predicted protein [Phaeodactylum tricornutum CCAP 1055/1]	UBE3A, E6AP	K10587	GO:0005622;GO:0016567;GO:0004842	708	T	V	T	V	3	S
gi|219126625|ref|XP_002183553.1|	predicted protein [Phaeodactylum tricornutum CCAP 1055/1]	UBE3A, E6AP	K10587	GO:0005622;GO:0016567;GO:0004842	765	T	L	T	L	3	S
gi|219126625|ref|XP_002183553.1|	predicted protein [Phaeodactylum tricornutum CCAP 1055/1]	UBE3A, E6AP	K10587	GO:0005622;GO:0016567;GO:0004842	780	C	P	C	P	3	S
gi|219126625|ref|XP_002183553.1|	predicted protein [Phaeodactylum tricornutum CCAP 1055/1]	UBE3A, E6AP	K10587	GO:0005622;GO:0016567;GO:0004842	798	A	Q	A	Q	3	S
gi|219126625|ref|XP_002183553.1|	predicted protein [Phaeodactylum tricornutum CCAP 1055/1]	UBE3A, E6AP	K10587	GO:0005622;GO:0016567;GO:0004842	846	C	P	C	P	3	S
gi|219126625|ref|XP_002183553.1|	predicted protein [Phaeodactylum tricornutum CCAP 1055/1]	UBE3A, E6AP	K10587	GO:0005622;GO:0016567;GO:0004842	867	C	P	C	P	3	S
gi|219126625|ref|XP_002183553.1|	predicted protein [Phaeodactylum tricornutum CCAP 1055/1]	UBE3A, E6AP	K10587	GO:0005622;GO:0016567;GO:0004842	885	A	K	A	K	3	S
gi|219114823|ref|XP_002178207.1|	ubiquitin-activating enzyme E1, protein 3 [Phaeodactylum tricornutum CCAP 1055/1]	UBE1C, UBA3	K10686	GO:0008641;GO:0045116;GO:0005524;GO:0016881	513	C	S	C	S	3	S
gi|219114823|ref|XP_002178207.1|	ubiquitin-activating enzyme E1, protein 3 [Phaeodactylum tricornutum CCAP 1055/1]	UBE1C, UBA3	K10686	GO:0008641;GO:0045116;GO:0005524;GO:0016881	579	A	N	A	N	3	S
gi|219114823|ref|XP_002178207.1|	ubiquitin-activating enzyme E1, protein 3 [Phaeodactylum tricornutum CCAP 1055/1]	UBE1C, UBA3	K10686	GO:0008641;GO:0045116;GO:0005524;GO:0016881	1281	A	K	A	K	3	S
gi|219114823|ref|XP_002178207.1|	ubiquitin-activating enzyme E1, protein 3 [Phaeodactylum tricornutum CCAP 1055/1]	UBE1C, UBA3	K10686	GO:0008641;GO:0045116;GO:0005524;GO:0016881	1305	C	T	C	T	3	S
gi|219114823|ref|XP_002178207.1|	ubiquitin-activating enzyme E1, protein 3 [Phaeodactylum tricornutum CCAP 1055/1]	UBE1C, UBA3	K10686	GO:0008641;GO:0045116;GO:0005524;GO:0016881	1314	A	N	A	N	3	S
gi|219114823|ref|XP_002178207.1|	ubiquitin-activating enzyme E1, protein 3 [Phaeodactylum tricornutum CCAP 1055/1]	UBE1C, UBA3	K10686	GO:0008641;GO:0045116;GO:0005524;GO:0016881	1392	C	T	C	T	3	S
gi|223999371|ref|XP_002289358.1|	ubiquitin activating enzyme 2 [Thalassiosira pseudonana CCMP1335]	UBE1, UBA1	K03178	GO:0008641;GO:0005524;GO:0016567;GO:0004842	300	G	R	G	R	3	S
gi|223999371|ref|XP_002289358.1|	ubiquitin activating enzyme 2 [Thalassiosira pseudonana CCMP1335]	UBE1, UBA1	K03178	GO:0008641;GO:0005524;GO:0016567;GO:0004842	318	C	A	C	A	3	S
gi|223999371|ref|XP_002289358.1|	ubiquitin activating enzyme 2 [Thalassiosira pseudonana CCMP1335]	UBE1, UBA1	K03178	GO:0008641;GO:0005524;GO:0016567;GO:0004842	651	C	P	C	P	3	S
gi|223999371|ref|XP_002289358.1|	ubiquitin activating enzyme 2 [Thalassiosira pseudonana CCMP1335]	UBE1, UBA1	K03178	GO:0008641;GO:0005524;GO:0016567;GO:0004842	663	T	L	T	L	3	S
gi|223999371|ref|XP_002289358.1|	ubiquitin activating enzyme 2 [Thalassiosira pseudonana CCMP1335]	UBE1, UBA1	K03178	GO:0008641;GO:0005524;GO:0016567;GO:0004842	1269	G	G	G	G	3	S
gi|223999371|ref|XP_002289358.1|	ubiquitin activating enzyme 2 [Thalassiosira pseudonana CCMP1335]	UBE1, UBA1	K03178	GO:0008641;GO:0005524;GO:0016567;GO:0004842	1386	C	S	C	S	3	S
gi|223999371|ref|XP_002289358.1|	ubiquitin activating enzyme 2 [Thalassiosira pseudonana CCMP1335]	UBE1, UBA1	K03178	GO:0008641;GO:0005524;GO:0016567;GO:0004842	2157	A	D	A	D	3	S
gi|223999371|ref|XP_002289358.1|	ubiquitin activating enzyme 2 [Thalassiosira pseudonana CCMP1335]	UBE1, UBA1	K03178	GO:0008641;GO:0005524;GO:0016567;GO:0004842	2418	G	G	G	G	3	S
gi|223999371|ref|XP_002289358.1|	ubiquitin activating enzyme 2 [Thalassiosira pseudonana CCMP1335]	UBE1, UBA1	K03178	GO:0008641;GO:0005524;GO:0016567;GO:0004842	2436	C	S	C	S	3	S
gi|223999371|ref|XP_002289358.1|	ubiquitin activating enzyme 2 [Thalassiosira pseudonana CCMP1335]	UBE1, UBA1	K03178	GO:0008641;GO:0005524;GO:0016567;GO:0004842	2529	C	S	C	S	3	S
gi|397623851|gb|EJK67169.1|	hypothetical protein THAOC_11833 [Thalassiosira oceanica]	U2AF2	K12837	GO:0000166	342	C	A	C	A	3	S
gi|397629487|gb|EJK69380.1|	hypothetical protein THAOC_09370, partial [Thalassiosira oceanica]	TYW1	K15449	GO:0010181;GO:0055114;GO:0016491;GO:0051536	171	A	Q	A	Q	3	S
gi|397629487|gb|EJK69380.1|	hypothetical protein THAOC_09370, partial [Thalassiosira oceanica]	TYW1	K15449	GO:0010181;GO:0055114;GO:0016491;GO:0051536	726	T	F	T	F	3	S
gi|397629487|gb|EJK69380.1|	hypothetical protein THAOC_09370, partial [Thalassiosira oceanica]	TYW1	K15449	GO:0010181;GO:0055114;GO:0016491;GO:0051536	783	C	T	C	T	3	S
gi|397629487|gb|EJK69380.1|	hypothetical protein THAOC_09370, partial [Thalassiosira oceanica]	TYW1	K15449	GO:0010181;GO:0055114;GO:0016491;GO:0051536	1017	C	A	C	A	3	S
gi|397629487|gb|EJK69380.1|	hypothetical protein THAOC_09370, partial [Thalassiosira oceanica]	TYW1	K15449	GO:0010181;GO:0055114;GO:0016491;GO:0051536	1020	C	A	C	A	3	S
gi|397629487|gb|EJK69380.1|	hypothetical protein THAOC_09370, partial [Thalassiosira oceanica]	TYW1	K15449	GO:0010181;GO:0055114;GO:0016491;GO:0051536	1062	C	A	C	A	3	S
gi|397629487|gb|EJK69380.1|	hypothetical protein THAOC_09370, partial [Thalassiosira oceanica]	TYW1	K15449	GO:0010181;GO:0055114;GO:0016491;GO:0051536	1353	C	A	C	A	3	S
gi|397629487|gb|EJK69380.1|	hypothetical protein THAOC_09370, partial [Thalassiosira oceanica]	TYW1	K15449	GO:0010181;GO:0055114;GO:0016491;GO:0051536	2052	C	T	C	T	3	S
gi|219124458|ref|XP_002182520.1|	predicted protein [Phaeodactylum tricornutum CCAP 1055/1]	ttuD	K00050	GO:0006544;GO:0003824;GO:0046487;GO:0055114;GO:0016618;GO:0006566;GO:0006563	45	G	R	G	R	3	S
gi|219124458|ref|XP_002182520.1|	predicted protein [Phaeodactylum tricornutum CCAP 1055/1]	ttuD	K00050	GO:0006544;GO:0003824;GO:0046487;GO:0055114;GO:0016618;GO:0006566;GO:0006563	561	T	I	T	I	3	S
gi|219124458|ref|XP_002182520.1|	predicted protein [Phaeodactylum tricornutum CCAP 1055/1]	ttuD	K00050	GO:0006544;GO:0003824;GO:0046487;GO:0055114;GO:0016618;GO:0006566;GO:0006563	858	C	A	C	A	3	S
gi|219124458|ref|XP_002182520.1|	predicted protein [Phaeodactylum tricornutum CCAP 1055/1]	ttuD	K00050	GO:0006544;GO:0003824;GO:0046487;GO:0055114;GO:0016618;GO:0006566;GO:0006563	1068	C	P	C	P	3	S
gi|219115063|ref|XP_002178327.1|	predicted protein [Phaeodactylum tricornutum CCAP 1055/1]	trxA	K03671	_	12	C	S	C	S	3	S
gi|219115063|ref|XP_002178327.1|	predicted protein [Phaeodactylum tricornutum CCAP 1055/1]	trxA	K03671	_	27	C	T	C	T	3	S
gi|219115063|ref|XP_002178327.1|	predicted protein [Phaeodactylum tricornutum CCAP 1055/1]	trxA	K03671	_	78	A	H	A	H	3	S
gi|219115063|ref|XP_002178327.1|	predicted protein [Phaeodactylum tricornutum CCAP 1055/1]	trxA	K03671	_	357	C	P	C	P	3	S
gi|219115063|ref|XP_002178327.1|	predicted protein [Phaeodactylum tricornutum CCAP 1055/1]	trxA	K03671	_	363	G	R	G	R	3	S
gi|219115063|ref|XP_002178327.1|	predicted protein [Phaeodactylum tricornutum CCAP 1055/1]	trxA	K03671	_	435	G	G	G	G	3	S
gi|219115063|ref|XP_002178327.1|	predicted protein [Phaeodactylum tricornutum CCAP 1055/1]	trxA	K03671	_	516	C	T	C	T	3	S
gi|219115063|ref|XP_002178327.1|	predicted protein [Phaeodactylum tricornutum CCAP 1055/1]	trxA	K03671	_	549	C	A	C	A	3	S
gi|219115063|ref|XP_002178327.1|	predicted protein [Phaeodactylum tricornutum CCAP 1055/1]	trxA	K03671	_	576	C	A	C	A	3	S
gi|219115063|ref|XP_002178327.1|	predicted protein [Phaeodactylum tricornutum CCAP 1055/1]	trxA	K03671	_	588	C	T	C	T	3	S
gi|219115063|ref|XP_002178327.1|	predicted protein [Phaeodactylum tricornutum CCAP 1055/1]	trxA	K03671	_	603	C	A	C	A	3	S
gi|219115063|ref|XP_002178327.1|	predicted protein [Phaeodactylum tricornutum CCAP 1055/1]	trxA	K03671	_	615	G	G	G	G	3	S
gi|219115063|ref|XP_002178327.1|	predicted protein [Phaeodactylum tricornutum CCAP 1055/1]	trxA	K03671	_	705	G	S	G	S	3	S
gi|219115063|ref|XP_002178327.1|	predicted protein [Phaeodactylum tricornutum CCAP 1055/1]	trxA	K03671	_	726	G	G	G	G	3	S
gi|223995577|ref|XP_002287462.1|	thioredoxin f [Thalassiosira pseudonana CCMP1335]	trxA	K03671	GO:0006118;GO:0045454;GO:0009055;GO:0006662;GO:0015035	384	A	E	A	E	3	S
gi|219118439|ref|XP_002179992.1|	predicted protein [Phaeodactylum tricornutum CCAP 1055/1]	TPR	K09291	_	9	C	S	C	S	3	S
gi|219118439|ref|XP_002179992.1|	predicted protein [Phaeodactylum tricornutum CCAP 1055/1]	TPR	K09291	_	213	C	T	C	T	3	S
gi|219118439|ref|XP_002179992.1|	predicted protein [Phaeodactylum tricornutum CCAP 1055/1]	TPR	K09291	_	342	G	R	G	R	3	S
gi|219118439|ref|XP_002179992.1|	predicted protein [Phaeodactylum tricornutum CCAP 1055/1]	TPR	K09291	_	678	A	N	A	N	3	S
gi|219118439|ref|XP_002179992.1|	predicted protein [Phaeodactylum tricornutum CCAP 1055/1]	TPR	K09291	_	693	G	S	G	S	3	S
gi|219118439|ref|XP_002179992.1|	predicted protein [Phaeodactylum tricornutum CCAP 1055/1]	TPR	K09291	_	741	C	A	C	A	3	S
gi|219118439|ref|XP_002179992.1|	predicted protein [Phaeodactylum tricornutum CCAP 1055/1]	TPR	K09291	_	765	A	Q	A	Q	3	S
gi|219118439|ref|XP_002179992.1|	predicted protein [Phaeodactylum tricornutum CCAP 1055/1]	TPR	K09291	_	2397	C	S	C	S	3	S
gi|219118439|ref|XP_002179992.1|	predicted protein [Phaeodactylum tricornutum CCAP 1055/1]	TPR	K09291	_	2520	C	T	C	T	3	S
gi|219118439|ref|XP_002179992.1|	predicted protein [Phaeodactylum tricornutum CCAP 1055/1]	TPR	K09291	_	3072	A	Q	A	Q	3	S
gi|219118439|ref|XP_002179992.1|	predicted protein [Phaeodactylum tricornutum CCAP 1055/1]	TPR	K09291	_	3315	A	Q	A	Q	3	S
gi|219118439|ref|XP_002179992.1|	predicted protein [Phaeodactylum tricornutum CCAP 1055/1]	TPR	K09291	_	3438	C	A	C	A	3	S
gi|219118439|ref|XP_002179992.1|	predicted protein [Phaeodactylum tricornutum CCAP 1055/1]	TPR	K09291	_	4566	C	A	C	A	3	S
gi|219118439|ref|XP_002179992.1|	predicted protein [Phaeodactylum tricornutum CCAP 1055/1]	TPR	K09291	_	5133	C	T	C	T	3	S
gi|219121233|ref|XP_002185844.1|	predicted protein [Phaeodactylum tricornutum CCAP 1055/1]	TOP1	K03163	GO:0006265;GO:0003918;GO:0005694;GO:0009405;GO:0043229;GO:0003917;GO:0030448	756	C	S	C	S	3	S
gi|219121233|ref|XP_002185844.1|	predicted protein [Phaeodactylum tricornutum CCAP 1055/1]	TOP1	K03163	GO:0006265;GO:0003918;GO:0005694;GO:0009405;GO:0043229;GO:0003917;GO:0030448	1065	T	V	T	V	3	S
gi|219121233|ref|XP_002185844.1|	predicted protein [Phaeodactylum tricornutum CCAP 1055/1]	TOP1	K03163	GO:0006265;GO:0003918;GO:0005694;GO:0009405;GO:0043229;GO:0003917;GO:0030448	1803	C	A	C	A	3	S
gi|219121233|ref|XP_002185844.1|	predicted protein [Phaeodactylum tricornutum CCAP 1055/1]	TOP1	K03163	GO:0006265;GO:0003918;GO:0005694;GO:0009405;GO:0043229;GO:0003917;GO:0030448	1806	A	K	A	K	3	S
gi|219121233|ref|XP_002185844.1|	predicted protein [Phaeodactylum tricornutum CCAP 1055/1]	TOP1	K03163	GO:0006265;GO:0003918;GO:0005694;GO:0009405;GO:0043229;GO:0003917;GO:0030448	1986	T	I	T	I	3	S
gi|219121233|ref|XP_002185844.1|	predicted protein [Phaeodactylum tricornutum CCAP 1055/1]	TOP1	K03163	GO:0006265;GO:0003918;GO:0005694;GO:0009405;GO:0043229;GO:0003917;GO:0030448	2037	T	V	T	V	3	S
gi|219116468|ref|XP_002179029.1|	predicted protein [Phaeodactylum tricornutum CCAP 1055/1]	TMPRSS11E	K09642	GO:0008233;GO:0003824	741	G	G	G	G	3	S
gi|219116468|ref|XP_002179029.1|	predicted protein [Phaeodactylum tricornutum CCAP 1055/1]	TMPRSS11E	K09642	GO:0008233;GO:0003824	903	C	A	C	A	3	S
gi|219116468|ref|XP_002179029.1|	predicted protein [Phaeodactylum tricornutum CCAP 1055/1]	TMPRSS11E	K09642	GO:0008233;GO:0003824	939	G	S	G	S	3	S
gi|219116468|ref|XP_002179029.1|	predicted protein [Phaeodactylum tricornutum CCAP 1055/1]	TMPRSS11E	K09642	GO:0008233;GO:0003824	948	C	P	C	P	3	S
gi|219116468|ref|XP_002179029.1|	predicted protein [Phaeodactylum tricornutum CCAP 1055/1]	TMPRSS11E	K09642	GO:0008233;GO:0003824	954	C	S	C	S	3	S
gi|219116468|ref|XP_002179029.1|	predicted protein [Phaeodactylum tricornutum CCAP 1055/1]	TMPRSS11E	K09642	GO:0008233;GO:0003824	1053	C	A	C	A	3	S
gi|392590496|gb|EIW79825.1|	Piwi-domain-containing protein [Coniophora puteana RWD-64-598 SS2]	TLS, FUS	K13098	_	351	G	G	G	G	3	S
gi|392590496|gb|EIW79825.1|	Piwi-domain-containing protein [Coniophora puteana RWD-64-598 SS2]	TLS, FUS	K13098	_	1044	T	L	T	L	3	S
gi|392590496|gb|EIW79825.1|	Piwi-domain-containing protein [Coniophora puteana RWD-64-598 SS2]	TLS, FUS	K13098	_	1281	G	G	G	G	3	S
gi|392590496|gb|EIW79825.1|	Piwi-domain-containing protein [Coniophora puteana RWD-64-598 SS2]	TLS, FUS	K13098	_	1290	C	T	C	T	3	S
gi|392590496|gb|EIW79825.1|	Piwi-domain-containing protein [Coniophora puteana RWD-64-598 SS2]	TLS, FUS	K13098	_	1293	T	I	T	I	3	S
gi|392590496|gb|EIW79825.1|	Piwi-domain-containing protein [Coniophora puteana RWD-64-598 SS2]	TLS, FUS	K13098	_	1368	C	S	C	S	3	S
gi|392590496|gb|EIW79825.1|	Piwi-domain-containing protein [Coniophora puteana RWD-64-598 SS2]	TLS, FUS	K13098	_	3594	T	L	T	L	3	S
gi|392590496|gb|EIW79825.1|	Piwi-domain-containing protein [Coniophora puteana RWD-64-598 SS2]	TLS, FUS	K13098	_	3606	C	S	C	S	3	S
gi|78212499|ref|YP_381278.1|	endoribonuclease L-PSP [Synechococcus sp. CC9605]	tdcF	K07567	_	6	T	V	T	V	3	S
gi|78212499|ref|YP_381278.1|	endoribonuclease L-PSP [Synechococcus sp. CC9605]	tdcF	K07567	_	156	C	P	C	P	3	S
gi|78212499|ref|YP_381278.1|	endoribonuclease L-PSP [Synechococcus sp. CC9605]	tdcF	K07567	_	183	A	N	A	N	3	S
gi|78212499|ref|YP_381278.1|	endoribonuclease L-PSP [Synechococcus sp. CC9605]	tdcF	K07567	_	225	T	I	T	I	3	S
gi|78212499|ref|YP_381278.1|	endoribonuclease L-PSP [Synechococcus sp. CC9605]	tdcF	K07567	_	231	A	E	A	E	3	S
gi|78212499|ref|YP_381278.1|	endoribonuclease L-PSP [Synechococcus sp. CC9605]	tdcF	K07567	_	243	A	E	A	E	3	S
gi|78212499|ref|YP_381278.1|	endoribonuclease L-PSP [Synechococcus sp. CC9605]	tdcF	K07567	_	258	C	P	C	P	3	S
gi|78212499|ref|YP_381278.1|	endoribonuclease L-PSP [Synechococcus sp. CC9605]	tdcF	K07567	_	273	C	S	C	S	3	S
gi|78212499|ref|YP_381278.1|	endoribonuclease L-PSP [Synechococcus sp. CC9605]	tdcF	K07567	_	288	T	V	T	V	3	S
gi|78212499|ref|YP_381278.1|	endoribonuclease L-PSP [Synechococcus sp. CC9605]	tdcF	K07567	_	294	C	T	C	T	3	S
gi|78212499|ref|YP_381278.1|	endoribonuclease L-PSP [Synechococcus sp. CC9605]	tdcF	K07567	_	351	C	A	C	A	3	S
gi|78212499|ref|YP_381278.1|	endoribonuclease L-PSP [Synechococcus sp. CC9605]	tdcF	K07567	_	360	T	I	T	I	3	S
gi|78212499|ref|YP_381278.1|	endoribonuclease L-PSP [Synechococcus sp. CC9605]	tdcF	K07567	_	366	C	A	C	A	3	S
gi|78212499|ref|YP_381278.1|	endoribonuclease L-PSP [Synechococcus sp. CC9605]	tdcF	K07567	_	372	C	T	C	T	3	S
gi|78212499|ref|YP_381278.1|	endoribonuclease L-PSP [Synechococcus sp. CC9605]	tdcF	K07567	_	375	G	R	G	R	3	S
gi|78212499|ref|YP_381278.1|	endoribonuclease L-PSP [Synechococcus sp. CC9605]	tdcF	K07567	_	390	A	N	A	N	3	S
gi|78212499|ref|YP_381278.1|	endoribonuclease L-PSP [Synechococcus sp. CC9605]	tdcF	K07567	_	396	G	G	G	G	3	S
gi|78212499|ref|YP_381278.1|	endoribonuclease L-PSP [Synechococcus sp. CC9605]	tdcF	K07567	_	399	C	A	C	A	3	S
gi|78212499|ref|YP_381278.1|	endoribonuclease L-PSP [Synechococcus sp. CC9605]	tdcF	K07567	_	411	C	A	C	A	3	S
gi|78212499|ref|YP_381278.1|	endoribonuclease L-PSP [Synechococcus sp. CC9605]	tdcF	K07567	_	420	C	A	C	A	3	S
gi|78212499|ref|YP_381278.1|	endoribonuclease L-PSP [Synechococcus sp. CC9605]	tdcF	K07567	_	441	G	C	G	C	3	S
gi|78212499|ref|YP_381278.1|	endoribonuclease L-PSP [Synechococcus sp. CC9605]	tdcF	K07567	_	444	C	T	C	T	3	S
gi|223999481|ref|XP_002289413.1|	predicted protein [Thalassiosira pseudonana CCMP1335]	TC.ZIP	K07238	GO:0016020;GO:0030001	264	G	G	G	G	3	S
gi|223997832|ref|XP_002288589.1|	predicted protein [Thalassiosira pseudonana CCMP1335]	TC.MIT	K03284	_	537	C	A	C	A	3	S
gi|223997832|ref|XP_002288589.1|	predicted protein [Thalassiosira pseudonana CCMP1335]	TC.MIT	K03284	_	570	T	F	T	F	3	S
gi|223997832|ref|XP_002288589.1|	predicted protein [Thalassiosira pseudonana CCMP1335]	TC.MIT	K03284	_	621	C	T	C	T	3	S
gi|223997832|ref|XP_002288589.1|	predicted protein [Thalassiosira pseudonana CCMP1335]	TC.MIT	K03284	_	708	C	S	C	S	3	S
gi|223997832|ref|XP_002288589.1|	predicted protein [Thalassiosira pseudonana CCMP1335]	TC.MIT	K03284	_	714	C	S	C	S	3	S
gi|223997832|ref|XP_002288589.1|	predicted protein [Thalassiosira pseudonana CCMP1335]	TC.MIT	K03284	_	723	A	D	A	D	3	S
gi|223997832|ref|XP_002288589.1|	predicted protein [Thalassiosira pseudonana CCMP1335]	TC.MIT	K03284	_	735	C	S	C	S	3	S
gi|223997832|ref|XP_002288589.1|	predicted protein [Thalassiosira pseudonana CCMP1335]	TC.MIT	K03284	_	774	C	T	C	T	3	S
gi|223997832|ref|XP_002288589.1|	predicted protein [Thalassiosira pseudonana CCMP1335]	TC.MIT	K03284	_	780	T	V	T	V	3	S
gi|223997832|ref|XP_002288589.1|	predicted protein [Thalassiosira pseudonana CCMP1335]	TC.MIT	K03284	_	786	T	I	T	I	3	S
gi|223997832|ref|XP_002288589.1|	predicted protein [Thalassiosira pseudonana CCMP1335]	TC.MIT	K03284	_	870	T	F	T	F	3	S
gi|223997832|ref|XP_002288589.1|	predicted protein [Thalassiosira pseudonana CCMP1335]	TC.MIT	K03284	_	873	C	A	C	A	3	S
gi|223997832|ref|XP_002288589.1|	predicted protein [Thalassiosira pseudonana CCMP1335]	TC.MIT	K03284	_	876	C	A	C	A	3	S
gi|223997832|ref|XP_002288589.1|	predicted protein [Thalassiosira pseudonana CCMP1335]	TC.MIT	K03284	_	879	C	S	C	S	3	S
gi|223997832|ref|XP_002288589.1|	predicted protein [Thalassiosira pseudonana CCMP1335]	TC.MIT	K03284	_	897	T	F	T	F	3	S
gi|223997832|ref|XP_002288589.1|	predicted protein [Thalassiosira pseudonana CCMP1335]	TC.MIT	K03284	_	966	C	T	C	T	3	S
gi|223997832|ref|XP_002288589.1|	predicted protein [Thalassiosira pseudonana CCMP1335]	TC.MIT	K03284	_	969	T	L	T	L	3	S
gi|223997832|ref|XP_002288589.1|	predicted protein [Thalassiosira pseudonana CCMP1335]	TC.MIT	K03284	_	984	A	H	A	H	3	S
gi|223997832|ref|XP_002288589.1|	predicted protein [Thalassiosira pseudonana CCMP1335]	TC.MIT	K03284	_	1086	C	T	C	T	3	S
gi|223997832|ref|XP_002288589.1|	predicted protein [Thalassiosira pseudonana CCMP1335]	TC.MIT	K03284	_	1119	A	E	A	E	3	S
gi|223997832|ref|XP_002288589.1|	predicted protein [Thalassiosira pseudonana CCMP1335]	TC.MIT	K03284	_	1143	C	P	C	P	3	S
gi|223997832|ref|XP_002288589.1|	predicted protein [Thalassiosira pseudonana CCMP1335]	TC.MIT	K03284	_	1152	A	Y	A	Y	3	S
gi|223997832|ref|XP_002288589.1|	predicted protein [Thalassiosira pseudonana CCMP1335]	TC.MIT	K03284	_	1176	T	L	T	L	3	S
gi|223997832|ref|XP_002288589.1|	predicted protein [Thalassiosira pseudonana CCMP1335]	TC.MIT	K03284	_	1179	C	S	C	S	3	S
gi|223997832|ref|XP_002288589.1|	predicted protein [Thalassiosira pseudonana CCMP1335]	TC.MIT	K03284	_	1185	C	A	C	A	3	S
gi|223997832|ref|XP_002288589.1|	predicted protein [Thalassiosira pseudonana CCMP1335]	TC.MIT	K03284	_	1215	G	S	G	S	3	S
gi|348676255|gb|EGZ16073.1|	hypothetical protein PHYSODRAFT_560612 [Phytophthora sojae]	TC.APA	K03294	GO:0016020	654	T	V	T	V	3	S
gi|348676255|gb|EGZ16073.1|	hypothetical protein PHYSODRAFT_560612 [Phytophthora sojae]	TC.APA	K03294	GO:0016020	684	T	V	T	V	3	S
gi|348676255|gb|EGZ16073.1|	hypothetical protein PHYSODRAFT_560612 [Phytophthora sojae]	TC.APA	K03294	GO:0016020	801	A	E	A	E	3	S
gi|348676255|gb|EGZ16073.1|	hypothetical protein PHYSODRAFT_560612 [Phytophthora sojae]	TC.APA	K03294	GO:0016020	975	A	E	A	E	3	S
gi|348676255|gb|EGZ16073.1|	hypothetical protein PHYSODRAFT_560612 [Phytophthora sojae]	TC.APA	K03294	GO:0016020	1314	T	V	T	V	3	S
gi|348676255|gb|EGZ16073.1|	hypothetical protein PHYSODRAFT_560612 [Phytophthora sojae]	TC.APA	K03294	GO:0016020	1365	A	D	A	D	3	S
gi|348676255|gb|EGZ16073.1|	hypothetical protein PHYSODRAFT_560612 [Phytophthora sojae]	TC.APA	K03294	GO:0016020	1377	C	S	C	S	3	S
gi|348676255|gb|EGZ16073.1|	hypothetical protein PHYSODRAFT_560612 [Phytophthora sojae]	TC.APA	K03294	GO:0016020	1392	G	G	G	G	3	S
gi|348676255|gb|EGZ16073.1|	hypothetical protein PHYSODRAFT_560612 [Phytophthora sojae]	TC.APA	K03294	GO:0016020	1524	C	T	C	T	3	S
gi|219128124|ref|XP_002184271.1|	nucleotide transporter 1 [Phaeodactylum tricornutum CCAP 1055/1]	TC.AAA	K03301	GO:0005471;GO:0005524;GO:0016021;GO:0006810	63	C	A	C	A	3	S
gi|219128124|ref|XP_002184271.1|	nucleotide transporter 1 [Phaeodactylum tricornutum CCAP 1055/1]	TC.AAA	K03301	GO:0005471;GO:0005524;GO:0016021;GO:0006810	126	C	T	C	T	3	S
gi|219128124|ref|XP_002184271.1|	nucleotide transporter 1 [Phaeodactylum tricornutum CCAP 1055/1]	TC.AAA	K03301	GO:0005471;GO:0005524;GO:0016021;GO:0006810	129	C	P	C	P	3	S
gi|219128124|ref|XP_002184271.1|	nucleotide transporter 1 [Phaeodactylum tricornutum CCAP 1055/1]	TC.AAA	K03301	GO:0005471;GO:0005524;GO:0016021;GO:0006810	153	A	K	A	K	3	S
gi|219128124|ref|XP_002184271.1|	nucleotide transporter 1 [Phaeodactylum tricornutum CCAP 1055/1]	TC.AAA	K03301	GO:0005471;GO:0005524;GO:0016021;GO:0006810	183	C	S	C	S	3	S
gi|219128124|ref|XP_002184271.1|	nucleotide transporter 1 [Phaeodactylum tricornutum CCAP 1055/1]	TC.AAA	K03301	GO:0005471;GO:0005524;GO:0016021;GO:0006810	243	A	Q	A	Q	3	S
gi|219128124|ref|XP_002184271.1|	nucleotide transporter 1 [Phaeodactylum tricornutum CCAP 1055/1]	TC.AAA	K03301	GO:0005471;GO:0005524;GO:0016021;GO:0006810	255	A	K	A	K	3	S
gi|219128124|ref|XP_002184271.1|	nucleotide transporter 1 [Phaeodactylum tricornutum CCAP 1055/1]	TC.AAA	K03301	GO:0005471;GO:0005524;GO:0016021;GO:0006810	276	T	I	T	I	3	S
gi|219128124|ref|XP_002184271.1|	nucleotide transporter 1 [Phaeodactylum tricornutum CCAP 1055/1]	TC.AAA	K03301	GO:0005471;GO:0005524;GO:0016021;GO:0006810	348	G	S	G	S	3	S
gi|219128124|ref|XP_002184271.1|	nucleotide transporter 1 [Phaeodactylum tricornutum CCAP 1055/1]	TC.AAA	K03301	GO:0005471;GO:0005524;GO:0016021;GO:0006810	387	A	H	A	H	3	S
gi|219128124|ref|XP_002184271.1|	nucleotide transporter 1 [Phaeodactylum tricornutum CCAP 1055/1]	TC.AAA	K03301	GO:0005471;GO:0005524;GO:0016021;GO:0006810	396	A	Q	A	Q	3	S
gi|219128124|ref|XP_002184271.1|	nucleotide transporter 1 [Phaeodactylum tricornutum CCAP 1055/1]	TC.AAA	K03301	GO:0005471;GO:0005524;GO:0016021;GO:0006810	489	G	G	G	G	3	S
gi|219128124|ref|XP_002184271.1|	nucleotide transporter 1 [Phaeodactylum tricornutum CCAP 1055/1]	TC.AAA	K03301	GO:0005471;GO:0005524;GO:0016021;GO:0006810	528	A	H	A	H	3	S
gi|219128124|ref|XP_002184271.1|	nucleotide transporter 1 [Phaeodactylum tricornutum CCAP 1055/1]	TC.AAA	K03301	GO:0005471;GO:0005524;GO:0016021;GO:0006810	534	G	C	G	C	3	S
gi|219128124|ref|XP_002184271.1|	nucleotide transporter 1 [Phaeodactylum tricornutum CCAP 1055/1]	TC.AAA	K03301	GO:0005471;GO:0005524;GO:0016021;GO:0006810	600	T	L	T	L	3	S
gi|219128124|ref|XP_002184271.1|	nucleotide transporter 1 [Phaeodactylum tricornutum CCAP 1055/1]	TC.AAA	K03301	GO:0005471;GO:0005524;GO:0016021;GO:0006810	621	T	V	T	V	3	S
gi|219128124|ref|XP_002184271.1|	nucleotide transporter 1 [Phaeodactylum tricornutum CCAP 1055/1]	TC.AAA	K03301	GO:0005471;GO:0005524;GO:0016021;GO:0006810	627	T	V	T	V	3	S
gi|219128124|ref|XP_002184271.1|	nucleotide transporter 1 [Phaeodactylum tricornutum CCAP 1055/1]	TC.AAA	K03301	GO:0005471;GO:0005524;GO:0016021;GO:0006810	636	C	A	C	A	3	S
gi|219128124|ref|XP_002184271.1|	nucleotide transporter 1 [Phaeodactylum tricornutum CCAP 1055/1]	TC.AAA	K03301	GO:0005471;GO:0005524;GO:0016021;GO:0006810	639	A	K	A	K	3	S
gi|219128124|ref|XP_002184271.1|	nucleotide transporter 1 [Phaeodactylum tricornutum CCAP 1055/1]	TC.AAA	K03301	GO:0005471;GO:0005524;GO:0016021;GO:0006810	651	T	L	T	L	3	S
gi|219128124|ref|XP_002184271.1|	nucleotide transporter 1 [Phaeodactylum tricornutum CCAP 1055/1]	TC.AAA	K03301	GO:0005471;GO:0005524;GO:0016021;GO:0006810	666	A	N	A	N	3	S
gi|219128124|ref|XP_002184271.1|	nucleotide transporter 1 [Phaeodactylum tricornutum CCAP 1055/1]	TC.AAA	K03301	GO:0005471;GO:0005524;GO:0016021;GO:0006810	681	C	T	C	T	3	S
gi|219128124|ref|XP_002184271.1|	nucleotide transporter 1 [Phaeodactylum tricornutum CCAP 1055/1]	TC.AAA	K03301	GO:0005471;GO:0005524;GO:0016021;GO:0006810	696	G	C	G	C	3	S
gi|219128124|ref|XP_002184271.1|	nucleotide transporter 1 [Phaeodactylum tricornutum CCAP 1055/1]	TC.AAA	K03301	GO:0005471;GO:0005524;GO:0016021;GO:0006810	702	G	C	G	C	3	S
gi|219128124|ref|XP_002184271.1|	nucleotide transporter 1 [Phaeodactylum tricornutum CCAP 1055/1]	TC.AAA	K03301	GO:0005471;GO:0005524;GO:0016021;GO:0006810	774	C	A	C	A	3	S
gi|219128124|ref|XP_002184271.1|	nucleotide transporter 1 [Phaeodactylum tricornutum CCAP 1055/1]	TC.AAA	K03301	GO:0005471;GO:0005524;GO:0016021;GO:0006810	783	G	G	G	G	3	S
gi|219128124|ref|XP_002184271.1|	nucleotide transporter 1 [Phaeodactylum tricornutum CCAP 1055/1]	TC.AAA	K03301	GO:0005471;GO:0005524;GO:0016021;GO:0006810	807	C	A	C	A	3	S
gi|219128124|ref|XP_002184271.1|	nucleotide transporter 1 [Phaeodactylum tricornutum CCAP 1055/1]	TC.AAA	K03301	GO:0005471;GO:0005524;GO:0016021;GO:0006810	810	C	A	C	A	3	S
gi|219128124|ref|XP_002184271.1|	nucleotide transporter 1 [Phaeodactylum tricornutum CCAP 1055/1]	TC.AAA	K03301	GO:0005471;GO:0005524;GO:0016021;GO:0006810	855	G	R	G	R	3	S
gi|219128124|ref|XP_002184271.1|	nucleotide transporter 1 [Phaeodactylum tricornutum CCAP 1055/1]	TC.AAA	K03301	GO:0005471;GO:0005524;GO:0016021;GO:0006810	933	T	V	T	V	3	S
gi|219128124|ref|XP_002184271.1|	nucleotide transporter 1 [Phaeodactylum tricornutum CCAP 1055/1]	TC.AAA	K03301	GO:0005471;GO:0005524;GO:0016021;GO:0006810	939	C	P	C	P	3	S
gi|219128124|ref|XP_002184271.1|	nucleotide transporter 1 [Phaeodactylum tricornutum CCAP 1055/1]	TC.AAA	K03301	GO:0005471;GO:0005524;GO:0016021;GO:0006810	951	T	V	T	V	3	S
gi|219128124|ref|XP_002184271.1|	nucleotide transporter 1 [Phaeodactylum tricornutum CCAP 1055/1]	TC.AAA	K03301	GO:0005471;GO:0005524;GO:0016021;GO:0006810	960	C	T	C	T	3	S
gi|219128124|ref|XP_002184271.1|	nucleotide transporter 1 [Phaeodactylum tricornutum CCAP 1055/1]	TC.AAA	K03301	GO:0005471;GO:0005524;GO:0016021;GO:0006810	972	C	P	C	P	3	S
gi|219128124|ref|XP_002184271.1|	nucleotide transporter 1 [Phaeodactylum tricornutum CCAP 1055/1]	TC.AAA	K03301	GO:0005471;GO:0005524;GO:0016021;GO:0006810	1014	G	R	G	R	3	S
gi|219128124|ref|XP_002184271.1|	nucleotide transporter 1 [Phaeodactylum tricornutum CCAP 1055/1]	TC.AAA	K03301	GO:0005471;GO:0005524;GO:0016021;GO:0006810	1053	A	D	A	D	3	S
gi|219128124|ref|XP_002184271.1|	nucleotide transporter 1 [Phaeodactylum tricornutum CCAP 1055/1]	TC.AAA	K03301	GO:0005471;GO:0005524;GO:0016021;GO:0006810	1080	G	G	G	G	3	S
gi|219128124|ref|XP_002184271.1|	nucleotide transporter 1 [Phaeodactylum tricornutum CCAP 1055/1]	TC.AAA	K03301	GO:0005471;GO:0005524;GO:0016021;GO:0006810	1113	T	L	T	L	3	S
gi|219128124|ref|XP_002184271.1|	nucleotide transporter 1 [Phaeodactylum tricornutum CCAP 1055/1]	TC.AAA	K03301	GO:0005471;GO:0005524;GO:0016021;GO:0006810	1188	A	K	A	K	3	S
gi|219128124|ref|XP_002184271.1|	nucleotide transporter 1 [Phaeodactylum tricornutum CCAP 1055/1]	TC.AAA	K03301	GO:0005471;GO:0005524;GO:0016021;GO:0006810	1281	C	S	C	S	3	S
gi|219128124|ref|XP_002184271.1|	nucleotide transporter 1 [Phaeodactylum tricornutum CCAP 1055/1]	TC.AAA	K03301	GO:0005471;GO:0005524;GO:0016021;GO:0006810	1347	G	G	G	G	3	S
gi|219128124|ref|XP_002184271.1|	nucleotide transporter 1 [Phaeodactylum tricornutum CCAP 1055/1]	TC.AAA	K03301	GO:0005471;GO:0005524;GO:0016021;GO:0006810	1383	G	G	G	G	3	S
gi|219128124|ref|XP_002184271.1|	nucleotide transporter 1 [Phaeodactylum tricornutum CCAP 1055/1]	TC.AAA	K03301	GO:0005471;GO:0005524;GO:0016021;GO:0006810	1458	A	E	A	E	3	S
gi|219128124|ref|XP_002184271.1|	nucleotide transporter 1 [Phaeodactylum tricornutum CCAP 1055/1]	TC.AAA	K03301	GO:0005471;GO:0005524;GO:0016021;GO:0006810	1464	C	A	C	A	3	S
gi|159487441|ref|XP_001701731.1|	predicted protein [Chlamydomonas reinhardtii]	tatD	K03424	GO:0006308;GO:0016888	36	C	P	C	P	3	S
gi|159487441|ref|XP_001701731.1|	predicted protein [Chlamydomonas reinhardtii]	tatD	K03424	GO:0006308;GO:0016888	69	C	A	C	A	3	S
gi|159487441|ref|XP_001701731.1|	predicted protein [Chlamydomonas reinhardtii]	tatD	K03424	GO:0006308;GO:0016888	93	A	H	A	H	3	S
gi|159487441|ref|XP_001701731.1|	predicted protein [Chlamydomonas reinhardtii]	tatD	K03424	GO:0006308;GO:0016888	165	A	H	A	H	3	S
gi|159487441|ref|XP_001701731.1|	predicted protein [Chlamydomonas reinhardtii]	tatD	K03424	GO:0006308;GO:0016888	177	T	I	T	I	3	S
gi|159487441|ref|XP_001701731.1|	predicted protein [Chlamydomonas reinhardtii]	tatD	K03424	GO:0006308;GO:0016888	192	A	E	A	E	3	S
gi|159487441|ref|XP_001701731.1|	predicted protein [Chlamydomonas reinhardtii]	tatD	K03424	GO:0006308;GO:0016888	222	T	V	T	V	3	S
gi|159487441|ref|XP_001701731.1|	predicted protein [Chlamydomonas reinhardtii]	tatD	K03424	GO:0006308;GO:0016888	225	G	G	G	G	3	S
gi|159487441|ref|XP_001701731.1|	predicted protein [Chlamydomonas reinhardtii]	tatD	K03424	GO:0006308;GO:0016888	231	C	P	C	P	3	S
gi|159487441|ref|XP_001701731.1|	predicted protein [Chlamydomonas reinhardtii]	tatD	K03424	GO:0006308;GO:0016888	234	C	T	C	T	3	S
gi|159487441|ref|XP_001701731.1|	predicted protein [Chlamydomonas reinhardtii]	tatD	K03424	GO:0006308;GO:0016888	252	A	D	A	D	3	S
gi|159487441|ref|XP_001701731.1|	predicted protein [Chlamydomonas reinhardtii]	tatD	K03424	GO:0006308;GO:0016888	258	T	L	T	L	3	S
gi|159487441|ref|XP_001701731.1|	predicted protein [Chlamydomonas reinhardtii]	tatD	K03424	GO:0006308;GO:0016888	261	A	E	A	E	3	S
gi|159487441|ref|XP_001701731.1|	predicted protein [Chlamydomonas reinhardtii]	tatD	K03424	GO:0006308;GO:0016888	276	A	D	A	D	3	S
gi|159487441|ref|XP_001701731.1|	predicted protein [Chlamydomonas reinhardtii]	tatD	K03424	GO:0006308;GO:0016888	387	C	T	C	T	3	S
gi|159487441|ref|XP_001701731.1|	predicted protein [Chlamydomonas reinhardtii]	tatD	K03424	GO:0006308;GO:0016888	489	T	I	T	I	3	S
gi|159487441|ref|XP_001701731.1|	predicted protein [Chlamydomonas reinhardtii]	tatD	K03424	GO:0006308;GO:0016888	492	G	G	G	G	3	S
gi|159487441|ref|XP_001701731.1|	predicted protein [Chlamydomonas reinhardtii]	tatD	K03424	GO:0006308;GO:0016888	501	G	G	G	G	3	S
gi|159487441|ref|XP_001701731.1|	predicted protein [Chlamydomonas reinhardtii]	tatD	K03424	GO:0006308;GO:0016888	513	C	T	C	T	3	S
gi|159487441|ref|XP_001701731.1|	predicted protein [Chlamydomonas reinhardtii]	tatD	K03424	GO:0006308;GO:0016888	522	A	E	A	E	3	S
gi|159487441|ref|XP_001701731.1|	predicted protein [Chlamydomonas reinhardtii]	tatD	K03424	GO:0006308;GO:0016888	531	T	V	T	V	3	S
gi|159487441|ref|XP_001701731.1|	predicted protein [Chlamydomonas reinhardtii]	tatD	K03424	GO:0006308;GO:0016888	534	C	P	C	P	3	S
gi|159487441|ref|XP_001701731.1|	predicted protein [Chlamydomonas reinhardtii]	tatD	K03424	GO:0006308;GO:0016888	540	A	D	A	D	3	S
gi|159487441|ref|XP_001701731.1|	predicted protein [Chlamydomonas reinhardtii]	tatD	K03424	GO:0006308;GO:0016888	558	A	D	A	D	3	S
gi|159487441|ref|XP_001701731.1|	predicted protein [Chlamydomonas reinhardtii]	tatD	K03424	GO:0006308;GO:0016888	561	C	P	C	P	3	S
gi|159487441|ref|XP_001701731.1|	predicted protein [Chlamydomonas reinhardtii]	tatD	K03424	GO:0006308;GO:0016888	567	G	C	G	C	3	S
gi|159487441|ref|XP_001701731.1|	predicted protein [Chlamydomonas reinhardtii]	tatD	K03424	GO:0006308;GO:0016888	573	T	I	T	I	3	S
gi|159487441|ref|XP_001701731.1|	predicted protein [Chlamydomonas reinhardtii]	tatD	K03424	GO:0006308;GO:0016888	576	G	R	G	R	3	S
gi|159487441|ref|XP_001701731.1|	predicted protein [Chlamydomonas reinhardtii]	tatD	K03424	GO:0006308;GO:0016888	579	C	P	C	P	3	S
gi|159487441|ref|XP_001701731.1|	predicted protein [Chlamydomonas reinhardtii]	tatD	K03424	GO:0006308;GO:0016888	582	A	H	A	H	3	S
gi|159487441|ref|XP_001701731.1|	predicted protein [Chlamydomonas reinhardtii]	tatD	K03424	GO:0006308;GO:0016888	585	C	A	C	A	3	S
gi|159487441|ref|XP_001701731.1|	predicted protein [Chlamydomonas reinhardtii]	tatD	K03424	GO:0006308;GO:0016888	699	A	Q	A	Q	3	S
gi|159487441|ref|XP_001701731.1|	predicted protein [Chlamydomonas reinhardtii]	tatD	K03424	GO:0006308;GO:0016888	726	C	A	C	A	3	S
gi|219128260|ref|XP_002184335.1|	predicted protein [Phaeodactylum tricornutum CCAP 1055/1]	SYVN1, HRD1	K10601	GO:0006950;GO:0046872	120	A	D	A	D	3	S
gi|219128260|ref|XP_002184335.1|	predicted protein [Phaeodactylum tricornutum CCAP 1055/1]	SYVN1, HRD1	K10601	GO:0006950;GO:0046872	543	A	D	A	D	3	S
gi|219128260|ref|XP_002184335.1|	predicted protein [Phaeodactylum tricornutum CCAP 1055/1]	SYVN1, HRD1	K10601	GO:0006950;GO:0046872	549	C	P	C	P	3	S
gi|219128260|ref|XP_002184335.1|	predicted protein [Phaeodactylum tricornutum CCAP 1055/1]	SYVN1, HRD1	K10601	GO:0006950;GO:0046872	573	C	T	C	T	3	S
gi|219128260|ref|XP_002184335.1|	predicted protein [Phaeodactylum tricornutum CCAP 1055/1]	SYVN1, HRD1	K10601	GO:0006950;GO:0046872	576	G	R	G	R	3	S
gi|219128260|ref|XP_002184335.1|	predicted protein [Phaeodactylum tricornutum CCAP 1055/1]	SYVN1, HRD1	K10601	GO:0006950;GO:0046872	603	C	A	C	A	3	S
gi|219128260|ref|XP_002184335.1|	predicted protein [Phaeodactylum tricornutum CCAP 1055/1]	SYVN1, HRD1	K10601	GO:0006950;GO:0046872	621	G	R	G	R	3	S
gi|219128260|ref|XP_002184335.1|	predicted protein [Phaeodactylum tricornutum CCAP 1055/1]	SYVN1, HRD1	K10601	GO:0006950;GO:0046872	855	A	D	A	D	3	S
gi|219128260|ref|XP_002184335.1|	predicted protein [Phaeodactylum tricornutum CCAP 1055/1]	SYVN1, HRD1	K10601	GO:0006950;GO:0046872	936	A	N	A	N	3	S
gi|219128260|ref|XP_002184335.1|	predicted protein [Phaeodactylum tricornutum CCAP 1055/1]	SYVN1, HRD1	K10601	GO:0006950;GO:0046872	945	A	D	A	D	3	S
gi|219128260|ref|XP_002184335.1|	predicted protein [Phaeodactylum tricornutum CCAP 1055/1]	SYVN1, HRD1	K10601	GO:0006950;GO:0046872	993	T	L	T	L	3	S
gi|219128260|ref|XP_002184335.1|	predicted protein [Phaeodactylum tricornutum CCAP 1055/1]	SYVN1, HRD1	K10601	GO:0006950;GO:0046872	1104	T	V	T	V	3	S
gi|219128260|ref|XP_002184335.1|	predicted protein [Phaeodactylum tricornutum CCAP 1055/1]	SYVN1, HRD1	K10601	GO:0006950;GO:0046872	1137	C	A	C	A	3	S
gi|219128260|ref|XP_002184335.1|	predicted protein [Phaeodactylum tricornutum CCAP 1055/1]	SYVN1, HRD1	K10601	GO:0006950;GO:0046872	1272	A	D	A	D	3	S
gi|219128260|ref|XP_002184335.1|	predicted protein [Phaeodactylum tricornutum CCAP 1055/1]	SYVN1, HRD1	K10601	GO:0006950;GO:0046872	1323	A	H	A	H	3	S
gi|219128260|ref|XP_002184335.1|	predicted protein [Phaeodactylum tricornutum CCAP 1055/1]	SYVN1, HRD1	K10601	GO:0006950;GO:0046872	1470	C	T	C	T	3	S
gi|219128260|ref|XP_002184335.1|	predicted protein [Phaeodactylum tricornutum CCAP 1055/1]	SYVN1, HRD1	K10601	GO:0006950;GO:0046872	1485	G	G	G	G	3	S
gi|219128260|ref|XP_002184335.1|	predicted protein [Phaeodactylum tricornutum CCAP 1055/1]	SYVN1, HRD1	K10601	GO:0006950;GO:0046872	1632	C	A	C	A	3	S
gi|219128260|ref|XP_002184335.1|	predicted protein [Phaeodactylum tricornutum CCAP 1055/1]	SYVN1, HRD1	K10601	GO:0006950;GO:0046872	1638	T	V	T	V	3	S
gi|363539921|ref|YP_004894941.1|	mg890 gene product [Megavirus putative BTB/POZ domain-containing protein [Megavirus chiliensis]	SUV420H	K11429	_	723	A	K	A	K	3	S
gi|363539921|ref|YP_004894941.1|	mg890 gene product [Megavirus putative BTB/POZ domain-containing protein [Megavirus chiliensis]	SUV420H	K11429	_	735	C	P	C	P	3	S
gi|363539921|ref|YP_004894941.1|	mg890 gene product [Megavirus putative BTB/POZ domain-containing protein [Megavirus chiliensis]	SUV420H	K11429	_	759	T	V	T	V	3	S
gi|219118292|ref|XP_002179924.1|	predicted protein [Phaeodactylum tricornutum CCAP 1055/1]	STXBP1, MUNC18-1	K15292	GO:0016192	102	C	T	C	T	3	S
gi|219118292|ref|XP_002179924.1|	predicted protein [Phaeodactylum tricornutum CCAP 1055/1]	STXBP1, MUNC18-1	K15292	GO:0016192	105	C	A	C	A	3	S
gi|219109577|ref|XP_002176543.1|	predicted protein [Phaeodactylum tricornutum CCAP 1055/1]	STX5	K08490	GO:0016020;GO:0016192;GO:0006810	675	A	Q	A	Q	3	S
gi|219118080|ref|XP_002179822.1|	predicted protein [Phaeodactylum tricornutum CCAP 1055/1]	STX1B_2_3	K08486	GO:0016020;GO:0005622;GO:0006886;GO:0005484;GO:0016192	330	A	N	A	N	3	S
gi|219118080|ref|XP_002179822.1|	predicted protein [Phaeodactylum tricornutum CCAP 1055/1]	STX1B_2_3	K08486	GO:0016020;GO:0005622;GO:0006886;GO:0005484;GO:0016192	423	A	K	A	K	3	S
gi|219118080|ref|XP_002179822.1|	predicted protein [Phaeodactylum tricornutum CCAP 1055/1]	STX1B_2_3	K08486	GO:0016020;GO:0005622;GO:0006886;GO:0005484;GO:0016192	450	A	K	A	K	3	S
gi|219118080|ref|XP_002179822.1|	predicted protein [Phaeodactylum tricornutum CCAP 1055/1]	STX1B_2_3	K08486	GO:0016020;GO:0005622;GO:0006886;GO:0005484;GO:0016192	561	T	I	T	I	3	S
gi|397591854|gb|EJK55497.1|	hypothetical protein THAOC_24768 [Thalassiosira oceanica]	STT3	K07151	GO:0004579;GO:0044425;GO:0016740;GO:0006486;GO:0008250;GO:0018279;GO:0004576	57	C	A	C	A	3	S
gi|397591854|gb|EJK55497.1|	hypothetical protein THAOC_24768 [Thalassiosira oceanica]	STT3	K07151	GO:0004579;GO:0044425;GO:0016740;GO:0006486;GO:0008250;GO:0018279;GO:0004576	108	C	A	C	A	3	S
gi|397591854|gb|EJK55497.1|	hypothetical protein THAOC_24768 [Thalassiosira oceanica]	STT3	K07151	GO:0004579;GO:0044425;GO:0016740;GO:0006486;GO:0008250;GO:0018279;GO:0004576	228	A	Q	A	Q	3	S
gi|397591854|gb|EJK55497.1|	hypothetical protein THAOC_24768 [Thalassiosira oceanica]	STT3	K07151	GO:0004579;GO:0044425;GO:0016740;GO:0006486;GO:0008250;GO:0018279;GO:0004576	234	T	F	T	F	3	S
gi|397591854|gb|EJK55497.1|	hypothetical protein THAOC_24768 [Thalassiosira oceanica]	STT3	K07151	GO:0004579;GO:0044425;GO:0016740;GO:0006486;GO:0008250;GO:0018279;GO:0004576	255	C	P	C	P	3	S
gi|397591854|gb|EJK55497.1|	hypothetical protein THAOC_24768 [Thalassiosira oceanica]	STT3	K07151	GO:0004579;GO:0044425;GO:0016740;GO:0006486;GO:0008250;GO:0018279;GO:0004576	270	T	V	T	V	3	S
gi|397591854|gb|EJK55497.1|	hypothetical protein THAOC_24768 [Thalassiosira oceanica]	STT3	K07151	GO:0004579;GO:0044425;GO:0016740;GO:0006486;GO:0008250;GO:0018279;GO:0004576	2190	C	P	C	P	3	S
gi|397591854|gb|EJK55497.1|	hypothetical protein THAOC_24768 [Thalassiosira oceanica]	STT3	K07151	GO:0004579;GO:0044425;GO:0016740;GO:0006486;GO:0008250;GO:0018279;GO:0004576	2199	G	R	G	R	3	S
gi|397591854|gb|EJK55497.1|	hypothetical protein THAOC_24768 [Thalassiosira oceanica]	STT3	K07151	GO:0004579;GO:0044425;GO:0016740;GO:0006486;GO:0008250;GO:0018279;GO:0004576	2202	G	G	G	G	3	S
gi|397591854|gb|EJK55497.1|	hypothetical protein THAOC_24768 [Thalassiosira oceanica]	STT3	K07151	GO:0004579;GO:0044425;GO:0016740;GO:0006486;GO:0008250;GO:0018279;GO:0004576	2310	C	T	C	T	3	S
gi|397591854|gb|EJK55497.1|	hypothetical protein THAOC_24768 [Thalassiosira oceanica]	STT3	K07151	GO:0004579;GO:0044425;GO:0016740;GO:0006486;GO:0008250;GO:0018279;GO:0004576	2316	C	S	C	S	3	S
gi|397591854|gb|EJK55497.1|	hypothetical protein THAOC_24768 [Thalassiosira oceanica]	STT3	K07151	GO:0004579;GO:0044425;GO:0016740;GO:0006486;GO:0008250;GO:0018279;GO:0004576	2340	A	K	A	K	3	S
gi|397591854|gb|EJK55497.1|	hypothetical protein THAOC_24768 [Thalassiosira oceanica]	STT3	K07151	GO:0004579;GO:0044425;GO:0016740;GO:0006486;GO:0008250;GO:0018279;GO:0004576	2346	A	H	A	H	3	S
gi|397591854|gb|EJK55497.1|	hypothetical protein THAOC_24768 [Thalassiosira oceanica]	STT3	K07151	GO:0004579;GO:0044425;GO:0016740;GO:0006486;GO:0008250;GO:0018279;GO:0004576	2361	T	V	T	V	3	S
gi|397591854|gb|EJK55497.1|	hypothetical protein THAOC_24768 [Thalassiosira oceanica]	STT3	K07151	GO:0004579;GO:0044425;GO:0016740;GO:0006486;GO:0008250;GO:0018279;GO:0004576	2634	A	E	A	E	3	S
gi|219127712|ref|XP_002184074.1|	predicted protein [Phaeodactylum tricornutum CCAP 1055/1]	STK38, NDR	K08790	GO:0005086;GO:0006468;GO:0005524;GO:0009069;GO:0043087;GO:0004674;GO:0032012	90	C	A	C	A	3	S
gi|219127712|ref|XP_002184074.1|	predicted protein [Phaeodactylum tricornutum CCAP 1055/1]	STK38, NDR	K08790	GO:0005086;GO:0006468;GO:0005524;GO:0009069;GO:0043087;GO:0004674;GO:0032012	726	C	A	C	A	3	S
gi|219127712|ref|XP_002184074.1|	predicted protein [Phaeodactylum tricornutum CCAP 1055/1]	STK38, NDR	K08790	GO:0005086;GO:0006468;GO:0005524;GO:0009069;GO:0043087;GO:0004674;GO:0032012	729	A	D	A	D	3	S
gi|397614048|gb|EJK62564.1|	hypothetical protein THAOC_16820 [Thalassiosira oceanica]	STIP1	K09553	_	984	C	A	C	A	3	S
gi|397614048|gb|EJK62564.1|	hypothetical protein THAOC_16820 [Thalassiosira oceanica]	STIP1	K09553	_	1002	A	D	A	D	3	S
gi|397614048|gb|EJK62564.1|	hypothetical protein THAOC_16820 [Thalassiosira oceanica]	STIP1	K09553	_	1035	C	A	C	A	3	S
gi|397614048|gb|EJK62564.1|	hypothetical protein THAOC_16820 [Thalassiosira oceanica]	STIP1	K09553	_	1260	G	S	G	S	3	S
gi|397614048|gb|EJK62564.1|	hypothetical protein THAOC_16820 [Thalassiosira oceanica]	STIP1	K09553	_	1635	C	A	C	A	3	S
gi|397570676|gb|EJK47404.1|	hypothetical protein THAOC_33876 [Thalassiosira oceanica]	ST13	K09560	_	129	T	I	T	I	3	S
gi|397570676|gb|EJK47404.1|	hypothetical protein THAOC_33876 [Thalassiosira oceanica]	ST13	K09560	_	132	C	T	C	T	3	S
gi|397570676|gb|EJK47404.1|	hypothetical protein THAOC_33876 [Thalassiosira oceanica]	ST13	K09560	_	135	T	L	T	L	3	S
gi|397570676|gb|EJK47404.1|	hypothetical protein THAOC_33876 [Thalassiosira oceanica]	ST13	K09560	_	972	A	Q	A	Q	3	S
gi|223998780|ref|XP_002289063.1|	predicted protein [Thalassiosira pseudonana CCMP1335]	ssb	K03111	GO:0016787	528	A	N	A	N	3	S
gi|223998780|ref|XP_002289063.1|	predicted protein [Thalassiosira pseudonana CCMP1335]	ssb	K03111	GO:0016787	2034	C	T	C	T	3	S
gi|223998780|ref|XP_002289063.1|	predicted protein [Thalassiosira pseudonana CCMP1335]	ssb	K03111	GO:0016787	2040	G	C	G	C	3	S
gi|223998780|ref|XP_002289063.1|	predicted protein [Thalassiosira pseudonana CCMP1335]	ssb	K03111	GO:0016787	2049	C	S	C	S	3	S
gi|223998780|ref|XP_002289063.1|	predicted protein [Thalassiosira pseudonana CCMP1335]	ssb	K03111	GO:0016787	2052	G	R	G	R	3	S
gi|223998780|ref|XP_002289063.1|	predicted protein [Thalassiosira pseudonana CCMP1335]	ssb	K03111	GO:0016787	2058	G	R	G	R	3	S
gi|223998780|ref|XP_002289063.1|	predicted protein [Thalassiosira pseudonana CCMP1335]	ssb	K03111	GO:0016787	2061	T	I	T	I	3	S
gi|223998780|ref|XP_002289063.1|	predicted protein [Thalassiosira pseudonana CCMP1335]	ssb	K03111	GO:0016787	2067	A	D	A	D	3	S
gi|223998780|ref|XP_002289063.1|	predicted protein [Thalassiosira pseudonana CCMP1335]	ssb	K03111	GO:0016787	2070	A	Q	A	Q	3	S
gi|223998780|ref|XP_002289063.1|	predicted protein [Thalassiosira pseudonana CCMP1335]	ssb	K03111	GO:0016787	2088	A	D	A	D	3	S
gi|223998780|ref|XP_002289063.1|	predicted protein [Thalassiosira pseudonana CCMP1335]	ssb	K03111	GO:0016787	2091	C	P	C	P	3	S
gi|223998780|ref|XP_002289063.1|	predicted protein [Thalassiosira pseudonana CCMP1335]	ssb	K03111	GO:0016787	2118	C	P	C	P	3	S
gi|223998780|ref|XP_002289063.1|	predicted protein [Thalassiosira pseudonana CCMP1335]	ssb	K03111	GO:0016787	2145	G	R	G	R	3	S
gi|223998780|ref|XP_002289063.1|	predicted protein [Thalassiosira pseudonana CCMP1335]	ssb	K03111	GO:0016787	2148	A	K	A	K	3	S
gi|223998780|ref|XP_002289063.1|	predicted protein [Thalassiosira pseudonana CCMP1335]	ssb	K03111	GO:0016787	2151	A	Q	A	Q	3	S
gi|223998780|ref|XP_002289063.1|	predicted protein [Thalassiosira pseudonana CCMP1335]	ssb	K03111	GO:0016787	2157	C	T	C	T	3	S
gi|223998780|ref|XP_002289063.1|	predicted protein [Thalassiosira pseudonana CCMP1335]	ssb	K03111	GO:0016787	2163	C	A	C	A	3	S
gi|223998780|ref|XP_002289063.1|	predicted protein [Thalassiosira pseudonana CCMP1335]	ssb	K03111	GO:0016787	2178	T	V	T	V	3	S
gi|223998780|ref|XP_002289063.1|	predicted protein [Thalassiosira pseudonana CCMP1335]	ssb	K03111	GO:0016787	2205	G	C	G	C	3	S
gi|223998780|ref|XP_002289063.1|	predicted protein [Thalassiosira pseudonana CCMP1335]	ssb	K03111	GO:0016787	2211	G	G	G	G	3	S
gi|223998780|ref|XP_002289063.1|	predicted protein [Thalassiosira pseudonana CCMP1335]	ssb	K03111	GO:0016787	2223	G	G	G	G	3	S
gi|223998780|ref|XP_002289063.1|	predicted protein [Thalassiosira pseudonana CCMP1335]	ssb	K03111	GO:0016787	2226	C	T	C	T	3	S
gi|223998780|ref|XP_002289063.1|	predicted protein [Thalassiosira pseudonana CCMP1335]	ssb	K03111	GO:0016787	2235	C	T	C	T	3	S
gi|223998780|ref|XP_002289063.1|	predicted protein [Thalassiosira pseudonana CCMP1335]	ssb	K03111	GO:0016787	2238	C	P	C	P	3	S
gi|223998780|ref|XP_002289063.1|	predicted protein [Thalassiosira pseudonana CCMP1335]	ssb	K03111	GO:0016787	2244	A	D	A	D	3	S
gi|223998780|ref|XP_002289063.1|	predicted protein [Thalassiosira pseudonana CCMP1335]	ssb	K03111	GO:0016787	2247	G	C	G	C	3	S
gi|223998780|ref|XP_002289063.1|	predicted protein [Thalassiosira pseudonana CCMP1335]	ssb	K03111	GO:0016787	2250	T	L	T	L	3	S
gi|223998780|ref|XP_002289063.1|	predicted protein [Thalassiosira pseudonana CCMP1335]	ssb	K03111	GO:0016787	2256	C	P	C	P	3	S
gi|223998780|ref|XP_002289063.1|	predicted protein [Thalassiosira pseudonana CCMP1335]	ssb	K03111	GO:0016787	2259	A	K	A	K	3	S
gi|223998780|ref|XP_002289063.1|	predicted protein [Thalassiosira pseudonana CCMP1335]	ssb	K03111	GO:0016787	2271	T	F	T	F	3	S
gi|223998780|ref|XP_002289063.1|	predicted protein [Thalassiosira pseudonana CCMP1335]	ssb	K03111	GO:0016787	2274	G	G	G	G	3	S
gi|223998780|ref|XP_002289063.1|	predicted protein [Thalassiosira pseudonana CCMP1335]	ssb	K03111	GO:0016787	2277	T	V	T	V	3	S
gi|223998780|ref|XP_002289063.1|	predicted protein [Thalassiosira pseudonana CCMP1335]	ssb	K03111	GO:0016787	2280	A	E	A	E	3	S
gi|223998780|ref|XP_002289063.1|	predicted protein [Thalassiosira pseudonana CCMP1335]	ssb	K03111	GO:0016787	2421	A	Q	A	Q	3	S
gi|223998780|ref|XP_002289063.1|	predicted protein [Thalassiosira pseudonana CCMP1335]	ssb	K03111	GO:0016787	2427	C	P	C	P	3	S
gi|223998780|ref|XP_002289063.1|	predicted protein [Thalassiosira pseudonana CCMP1335]	ssb	K03111	GO:0016787	2436	T	I	T	I	3	S
gi|397615435|gb|EJK63431.1|	hypothetical protein THAOC_15908 [Thalassiosira oceanica]	ssb	K03111	GO:0006260;GO:0003697;GO:0005739	24	C	T	C	T	3	S
gi|397615435|gb|EJK63431.1|	hypothetical protein THAOC_15908 [Thalassiosira oceanica]	ssb	K03111	GO:0006260;GO:0003697;GO:0005739	36	G	C	G	C	3	S
gi|397615435|gb|EJK63431.1|	hypothetical protein THAOC_15908 [Thalassiosira oceanica]	ssb	K03111	GO:0006260;GO:0003697;GO:0005739	156	C	A	C	A	3	S
gi|397615435|gb|EJK63431.1|	hypothetical protein THAOC_15908 [Thalassiosira oceanica]	ssb	K03111	GO:0006260;GO:0003697;GO:0005739	186	T	I	T	I	3	S
gi|397615435|gb|EJK63431.1|	hypothetical protein THAOC_15908 [Thalassiosira oceanica]	ssb	K03111	GO:0006260;GO:0003697;GO:0005739	213	C	T	C	T	3	S
gi|397615435|gb|EJK63431.1|	hypothetical protein THAOC_15908 [Thalassiosira oceanica]	ssb	K03111	GO:0006260;GO:0003697;GO:0005739	336	A	E	A	E	3	S
gi|397615435|gb|EJK63431.1|	hypothetical protein THAOC_15908 [Thalassiosira oceanica]	ssb	K03111	GO:0006260;GO:0003697;GO:0005739	405	A	Q	A	Q	3	S
gi|397615435|gb|EJK63431.1|	hypothetical protein THAOC_15908 [Thalassiosira oceanica]	ssb	K03111	GO:0006260;GO:0003697;GO:0005739	426	T	V	T	V	3	S
gi|397615435|gb|EJK63431.1|	hypothetical protein THAOC_15908 [Thalassiosira oceanica]	ssb	K03111	GO:0006260;GO:0003697;GO:0005739	489	A	E	A	E	3	S
gi|397615435|gb|EJK63431.1|	hypothetical protein THAOC_15908 [Thalassiosira oceanica]	ssb	K03111	GO:0006260;GO:0003697;GO:0005739	507	T	F	T	F	3	S
gi|397615435|gb|EJK63431.1|	hypothetical protein THAOC_15908 [Thalassiosira oceanica]	ssb	K03111	GO:0006260;GO:0003697;GO:0005739	567	G	R	G	R	3	S
gi|397615435|gb|EJK63431.1|	hypothetical protein THAOC_15908 [Thalassiosira oceanica]	ssb	K03111	GO:0006260;GO:0003697;GO:0005739	606	G	R	G	R	3	S
gi|397615435|gb|EJK63431.1|	hypothetical protein THAOC_15908 [Thalassiosira oceanica]	ssb	K03111	GO:0006260;GO:0003697;GO:0005739	624	C	P	C	P	3	S
gi|397615435|gb|EJK63431.1|	hypothetical protein THAOC_15908 [Thalassiosira oceanica]	ssb	K03111	GO:0006260;GO:0003697;GO:0005739	633	G	G	G	G	3	S
gi|397615435|gb|EJK63431.1|	hypothetical protein THAOC_15908 [Thalassiosira oceanica]	ssb	K03111	GO:0006260;GO:0003697;GO:0005739	648	A	E	A	E	3	S
gi|219123108|ref|XP_002181873.1|	predicted protein [Phaeodactylum tricornutum CCAP 1055/1]	SRPR	K13431	GO:0006886;GO:0000166;GO:0017111	567	G	G	G	G	3	S
gi|219123108|ref|XP_002181873.1|	predicted protein [Phaeodactylum tricornutum CCAP 1055/1]	SRPR	K13431	GO:0006886;GO:0000166;GO:0017111	1227	C	T	C	T	3	S
gi|219113707|ref|XP_002186437.1|	predicted protein [Phaeodactylum tricornutum CCAP 1055/1]	SRPK3, STK23	K08832	GO:0006468;GO:0005524;GO:0009069;GO:0004674	477	C	A	C	A	3	S
gi|219113707|ref|XP_002186437.1|	predicted protein [Phaeodactylum tricornutum CCAP 1055/1]	SRPK3, STK23	K08832	GO:0006468;GO:0005524;GO:0009069;GO:0004674	1239	C	P	C	P	3	S
gi|219113707|ref|XP_002186437.1|	predicted protein [Phaeodactylum tricornutum CCAP 1055/1]	SRPK3, STK23	K08832	GO:0006468;GO:0005524;GO:0009069;GO:0004674	1371	A	Q	A	Q	3	S
gi|219113707|ref|XP_002186437.1|	predicted protein [Phaeodactylum tricornutum CCAP 1055/1]	SRPK3, STK23	K08832	GO:0006468;GO:0005524;GO:0009069;GO:0004674	105	C	P	C	P	3	S
gi|219113707|ref|XP_002186437.1|	predicted protein [Phaeodactylum tricornutum CCAP 1055/1]	SRPK3, STK23	K08832	GO:0006468;GO:0005524;GO:0009069;GO:0004674	108	A	N	A	N	3	S
gi|219113707|ref|XP_002186437.1|	predicted protein [Phaeodactylum tricornutum CCAP 1055/1]	SRPK3, STK23	K08832	GO:0006468;GO:0005524;GO:0009069;GO:0004674	156	A	E	A	E	3	S
gi|397569853|gb|EJK47015.1|	hypothetical protein THAOC_34296 [Thalassiosira oceanica]	SRP54, ffh	K03106	GO:0006184;GO:0003924;GO:0006614;GO:0005525;GO:0048500;GO:0008312	675	G	R	G	R	3	S
gi|397569853|gb|EJK47015.1|	hypothetical protein THAOC_34296 [Thalassiosira oceanica]	SRP54, ffh	K03106	GO:0006184;GO:0003924;GO:0006614;GO:0005525;GO:0048500;GO:0008312	699	C	A	C	A	3	S
gi|397569853|gb|EJK47015.1|	hypothetical protein THAOC_34296 [Thalassiosira oceanica]	SRP54, ffh	K03106	GO:0006184;GO:0003924;GO:0006614;GO:0005525;GO:0048500;GO:0008312	1185	G	G	G	G	3	S
gi|397569853|gb|EJK47015.1|	hypothetical protein THAOC_34296 [Thalassiosira oceanica]	SRP54, ffh	K03106	GO:0006184;GO:0003924;GO:0006614;GO:0005525;GO:0048500;GO:0008312	1317	C	T	C	T	3	S
gi|219129993|ref|XP_002185160.1|	predicted protein [Phaeodactylum tricornutum CCAP 1055/1]	SR140	K12842	GO:0006396;GO:0003723;GO:0000166	159	C	S	C	S	3	S
gi|219130238|ref|XP_002185276.1|	glycosyl transferase, group 1 [Phaeodactylum tricornutum CCAP 1055/1]	SQD2	K06119	GO:0009058;GO:0016740	51	C	A	C	A	3	S
gi|219130238|ref|XP_002185276.1|	glycosyl transferase, group 1 [Phaeodactylum tricornutum CCAP 1055/1]	SQD2	K06119	GO:0009058;GO:0016740	72	C	T	C	T	3	S
gi|219130238|ref|XP_002185276.1|	glycosyl transferase, group 1 [Phaeodactylum tricornutum CCAP 1055/1]	SQD2	K06119	GO:0009058;GO:0016740	78	C	T	C	T	3	S
gi|219130238|ref|XP_002185276.1|	glycosyl transferase, group 1 [Phaeodactylum tricornutum CCAP 1055/1]	SQD2	K06119	GO:0009058;GO:0016740	189	C	S	C	S	3	S
gi|219130238|ref|XP_002185276.1|	glycosyl transferase, group 1 [Phaeodactylum tricornutum CCAP 1055/1]	SQD2	K06119	GO:0009058;GO:0016740	372	T	V	T	V	3	S
gi|219130238|ref|XP_002185276.1|	glycosyl transferase, group 1 [Phaeodactylum tricornutum CCAP 1055/1]	SQD2	K06119	GO:0009058;GO:0016740	537	G	G	G	G	3	S
gi|219130238|ref|XP_002185276.1|	glycosyl transferase, group 1 [Phaeodactylum tricornutum CCAP 1055/1]	SQD2	K06119	GO:0009058;GO:0016740	651	A	H	A	H	3	S
gi|219130238|ref|XP_002185276.1|	glycosyl transferase, group 1 [Phaeodactylum tricornutum CCAP 1055/1]	SQD2	K06119	GO:0009058;GO:0016740	723	G	G	G	G	3	S
gi|219130238|ref|XP_002185276.1|	glycosyl transferase, group 1 [Phaeodactylum tricornutum CCAP 1055/1]	SQD2	K06119	GO:0009058;GO:0016740	738	G	G	G	G	3	S
gi|219130238|ref|XP_002185276.1|	glycosyl transferase, group 1 [Phaeodactylum tricornutum CCAP 1055/1]	SQD2	K06119	GO:0009058;GO:0016740	864	G	R	G	R	3	S
gi|219130238|ref|XP_002185276.1|	glycosyl transferase, group 1 [Phaeodactylum tricornutum CCAP 1055/1]	SQD2	K06119	GO:0009058;GO:0016740	888	G	G	G	G	3	S
gi|219130238|ref|XP_002185276.1|	glycosyl transferase, group 1 [Phaeodactylum tricornutum CCAP 1055/1]	SQD2	K06119	GO:0009058;GO:0016740	906	T	F	T	F	3	S
gi|219130238|ref|XP_002185276.1|	glycosyl transferase, group 1 [Phaeodactylum tricornutum CCAP 1055/1]	SQD2	K06119	GO:0009058;GO:0016740	936	C	P	C	P	3	S
gi|219130238|ref|XP_002185276.1|	glycosyl transferase, group 1 [Phaeodactylum tricornutum CCAP 1055/1]	SQD2	K06119	GO:0009058;GO:0016740	939	G	G	G	G	3	S
gi|219130238|ref|XP_002185276.1|	glycosyl transferase, group 1 [Phaeodactylum tricornutum CCAP 1055/1]	SQD2	K06119	GO:0009058;GO:0016740	990	T	I	T	I	3	S
gi|219130238|ref|XP_002185276.1|	glycosyl transferase, group 1 [Phaeodactylum tricornutum CCAP 1055/1]	SQD2	K06119	GO:0009058;GO:0016740	1104	T	I	T	I	3	S
gi|224008817|ref|XP_002293367.1|	predicted protein [Thalassiosira pseudonana CCMP1335]	SPPL2B	K09597	GO:0016020;GO:0016023;GO:0016787	981	A	D	A	D	3	S
gi|224008817|ref|XP_002293367.1|	predicted protein [Thalassiosira pseudonana CCMP1335]	SPPL2B	K09597	GO:0016020;GO:0016023;GO:0016787	1074	A	E	A	E	3	S
gi|224008817|ref|XP_002293367.1|	predicted protein [Thalassiosira pseudonana CCMP1335]	SPPL2B	K09597	GO:0016020;GO:0016023;GO:0016787	1716	T	F	T	F	3	S
gi|224008817|ref|XP_002293367.1|	predicted protein [Thalassiosira pseudonana CCMP1335]	SPPL2B	K09597	GO:0016020;GO:0016023;GO:0016787	1749	T	F	T	F	3	S
gi|224008817|ref|XP_002293367.1|	predicted protein [Thalassiosira pseudonana CCMP1335]	SPPL2B	K09597	GO:0016020;GO:0016023;GO:0016787	1920	C	A	C	A	3	S
gi|224008817|ref|XP_002293367.1|	predicted protein [Thalassiosira pseudonana CCMP1335]	SPPL2B	K09597	GO:0016020;GO:0016023;GO:0016787	2049	T	I	T	I	3	S
gi|224008817|ref|XP_002293367.1|	predicted protein [Thalassiosira pseudonana CCMP1335]	SPPL2B	K09597	GO:0016020;GO:0016023;GO:0016787	2247	C	A	C	A	3	S
gi|224008817|ref|XP_002293367.1|	predicted protein [Thalassiosira pseudonana CCMP1335]	SPPL2B	K09597	GO:0016020;GO:0016023;GO:0016787	2385	A	K	A	K	3	S
gi|224008817|ref|XP_002293367.1|	predicted protein [Thalassiosira pseudonana CCMP1335]	SPPL2B	K09597	GO:0016020;GO:0016023;GO:0016787	2811	G	R	G	R	3	S
gi|224008817|ref|XP_002293367.1|	predicted protein [Thalassiosira pseudonana CCMP1335]	SPPL2B	K09597	GO:0016020;GO:0016023;GO:0016787	2823	C	T	C	T	3	S
gi|224008817|ref|XP_002293367.1|	predicted protein [Thalassiosira pseudonana CCMP1335]	SPPL2B	K09597	GO:0016020;GO:0016023;GO:0016787	2871	C	S	C	S	3	S
gi|224008817|ref|XP_002293367.1|	predicted protein [Thalassiosira pseudonana CCMP1335]	SPPL2B	K09597	GO:0016020;GO:0016023;GO:0016787	2877	G	R	G	R	3	S
gi|224008817|ref|XP_002293367.1|	predicted protein [Thalassiosira pseudonana CCMP1335]	SPPL2B	K09597	GO:0016020;GO:0016023;GO:0016787	2895	A	K	A	K	3	S
gi|224008817|ref|XP_002293367.1|	predicted protein [Thalassiosira pseudonana CCMP1335]	SPPL2B	K09597	GO:0016020;GO:0016023;GO:0016787	2949	G	C	G	C	3	S
gi|224008817|ref|XP_002293367.1|	predicted protein [Thalassiosira pseudonana CCMP1335]	SPPL2B	K09597	GO:0016020;GO:0016023;GO:0016787	2952	T	V	T	V	3	S
gi|224008817|ref|XP_002293367.1|	predicted protein [Thalassiosira pseudonana CCMP1335]	SPPL2B	K09597	GO:0016020;GO:0016023;GO:0016787	2955	G	G	G	G	3	S
gi|224008817|ref|XP_002293367.1|	predicted protein [Thalassiosira pseudonana CCMP1335]	SPPL2B	K09597	GO:0016020;GO:0016023;GO:0016787	2973	C	T	C	T	3	S
gi|224008817|ref|XP_002293367.1|	predicted protein [Thalassiosira pseudonana CCMP1335]	SPPL2B	K09597	GO:0016020;GO:0016023;GO:0016787	2982	A	K	A	K	3	S
gi|224008817|ref|XP_002293367.1|	predicted protein [Thalassiosira pseudonana CCMP1335]	SPPL2B	K09597	GO:0016020;GO:0016023;GO:0016787	2997	G	S	G	S	3	S
gi|224008817|ref|XP_002293367.1|	predicted protein [Thalassiosira pseudonana CCMP1335]	SPPL2B	K09597	GO:0016020;GO:0016023;GO:0016787	3075	C	S	C	S	3	S
gi|198452267|ref|XP_001358699.2|	GA22127, isoform A [Drosophila pseudoobscura pseudoobscura]	SPOP	K10523	_	2826	G	S	G	S	3	S
gi|219126305|ref|XP_002183401.1|	predicted protein [Phaeodactylum tricornutum CCAP 1055/1]	SPCS2, SPC2	K12947	GO:0044425	9	C	P	C	P	3	S
gi|219126305|ref|XP_002183401.1|	predicted protein [Phaeodactylum tricornutum CCAP 1055/1]	SPCS2, SPC2	K12947	GO:0044425	240	G	G	G	G	3	S
gi|219126305|ref|XP_002183401.1|	predicted protein [Phaeodactylum tricornutum CCAP 1055/1]	SPCS2, SPC2	K12947	GO:0044425	387	G	G	G	G	3	S
gi|219126305|ref|XP_002183401.1|	predicted protein [Phaeodactylum tricornutum CCAP 1055/1]	SPCS2, SPC2	K12947	GO:0044425	393	T	F	T	F	3	S
gi|219126305|ref|XP_002183401.1|	predicted protein [Phaeodactylum tricornutum CCAP 1055/1]	SPCS2, SPC2	K12947	GO:0044425	402	G	G	G	G	3	S
gi|219126305|ref|XP_002183401.1|	predicted protein [Phaeodactylum tricornutum CCAP 1055/1]	SPCS2, SPC2	K12947	GO:0044425	417	C	A	C	A	3	S
gi|397622729|gb|EJK66768.1|	hypothetical protein THAOC_12275 [Thalassiosira oceanica]	sohB	K04774	GO:0006508;GO:0005886;GO:0004252	1074	C	A	C	A	3	S
gi|397622729|gb|EJK66768.1|	hypothetical protein THAOC_12275 [Thalassiosira oceanica]	sohB	K04774	GO:0006508;GO:0005886;GO:0004252	1077	T	V	T	V	3	S
gi|397622729|gb|EJK66768.1|	hypothetical protein THAOC_12275 [Thalassiosira oceanica]	sohB	K04774	GO:0006508;GO:0005886;GO:0004252	1176	T	L	T	L	3	S
gi|397622729|gb|EJK66768.1|	hypothetical protein THAOC_12275 [Thalassiosira oceanica]	sohB	K04774	GO:0006508;GO:0005886;GO:0004252	1464	T	V	T	V	3	S
gi|397622729|gb|EJK66768.1|	hypothetical protein THAOC_12275 [Thalassiosira oceanica]	sohB	K04774	GO:0006508;GO:0005886;GO:0004252	1479	T	V	T	V	3	S
gi|397638104|gb|EJK72932.1|	hypothetical protein THAOC_05490 [Thalassiosira oceanica]	SNRPD3, SMD3	K11088	_	120	C	P	C	P	3	S
gi|219117519|ref|XP_002179554.1|	predicted protein [Phaeodactylum tricornutum CCAP 1055/1]	SNRPB, SMB	K11086	GO:0005730	222	G	R	G	R	3	S
gi|219117519|ref|XP_002179554.1|	predicted protein [Phaeodactylum tricornutum CCAP 1055/1]	SNRPB, SMB	K11086	GO:0005730	255	G	G	G	G	3	S
gi|219117846|ref|XP_002179710.1|	predicted protein [Phaeodactylum tricornutum CCAP 1055/1]	SNRPA1	K11092	_	60	A	E	A	E	3	S
gi|219117846|ref|XP_002179710.1|	predicted protein [Phaeodactylum tricornutum CCAP 1055/1]	SNRPA1	K11092	_	144	T	F	T	F	3	S
gi|219117846|ref|XP_002179710.1|	predicted protein [Phaeodactylum tricornutum CCAP 1055/1]	SNRPA1	K11092	_	204	A	H	A	H	3	S
gi|219117846|ref|XP_002179710.1|	predicted protein [Phaeodactylum tricornutum CCAP 1055/1]	SNRPA1	K11092	_	288	C	A	C	A	3	S
gi|219112199|ref|XP_002177851.1|	predicted protein [Phaeodactylum tricornutum CCAP 1055/1]	SNIP1	K13108	_	78	C	P	C	P	3	S
gi|219112199|ref|XP_002177851.1|	predicted protein [Phaeodactylum tricornutum CCAP 1055/1]	SNIP1	K13108	_	99	G	R	G	R	3	S
gi|219112199|ref|XP_002177851.1|	predicted protein [Phaeodactylum tricornutum CCAP 1055/1]	SNIP1	K13108	_	186	C	T	C	T	3	S
gi|219112199|ref|XP_002177851.1|	predicted protein [Phaeodactylum tricornutum CCAP 1055/1]	SNIP1	K13108	_	192	C	T	C	T	3	S
gi|219112199|ref|XP_002177851.1|	predicted protein [Phaeodactylum tricornutum CCAP 1055/1]	SNIP1	K13108	_	207	C	A	C	A	3	S
gi|219112199|ref|XP_002177851.1|	predicted protein [Phaeodactylum tricornutum CCAP 1055/1]	SNIP1	K13108	_	240	G	R	G	R	3	S
gi|219112199|ref|XP_002177851.1|	predicted protein [Phaeodactylum tricornutum CCAP 1055/1]	SNIP1	K13108	_	243	A	E	A	E	3	S
gi|219112199|ref|XP_002177851.1|	predicted protein [Phaeodactylum tricornutum CCAP 1055/1]	SNIP1	K13108	_	246	C	A	C	A	3	S
gi|219112199|ref|XP_002177851.1|	predicted protein [Phaeodactylum tricornutum CCAP 1055/1]	SNIP1	K13108	_	264	A	Y	A	Y	3	S
gi|219112199|ref|XP_002177851.1|	predicted protein [Phaeodactylum tricornutum CCAP 1055/1]	SNIP1	K13108	_	270	G	R	G	R	3	S
gi|219112199|ref|XP_002177851.1|	predicted protein [Phaeodactylum tricornutum CCAP 1055/1]	SNIP1	K13108	_	285	T	I	T	I	3	S
gi|219112199|ref|XP_002177851.1|	predicted protein [Phaeodactylum tricornutum CCAP 1055/1]	SNIP1	K13108	_	297	G	G	G	G	3	S
gi|219112199|ref|XP_002177851.1|	predicted protein [Phaeodactylum tricornutum CCAP 1055/1]	SNIP1	K13108	_	336	A	E	A	E	3	S
gi|219112199|ref|XP_002177851.1|	predicted protein [Phaeodactylum tricornutum CCAP 1055/1]	SNIP1	K13108	_	378	G	G	G	G	3	S
gi|219112199|ref|XP_002177851.1|	predicted protein [Phaeodactylum tricornutum CCAP 1055/1]	SNIP1	K13108	_	381	A	D	A	D	3	S
gi|219112199|ref|XP_002177851.1|	predicted protein [Phaeodactylum tricornutum CCAP 1055/1]	SNIP1	K13108	_	396	A	D	A	D	3	S
gi|219112199|ref|XP_002177851.1|	predicted protein [Phaeodactylum tricornutum CCAP 1055/1]	SNIP1	K13108	_	450	C	A	C	A	3	S
gi|219112199|ref|XP_002177851.1|	predicted protein [Phaeodactylum tricornutum CCAP 1055/1]	SNIP1	K13108	_	486	G	G	G	G	3	S
gi|219112199|ref|XP_002177851.1|	predicted protein [Phaeodactylum tricornutum CCAP 1055/1]	SNIP1	K13108	_	504	A	E	A	E	3	S
gi|219112199|ref|XP_002177851.1|	predicted protein [Phaeodactylum tricornutum CCAP 1055/1]	SNIP1	K13108	_	507	G	R	G	R	3	S
gi|219112199|ref|XP_002177851.1|	predicted protein [Phaeodactylum tricornutum CCAP 1055/1]	SNIP1	K13108	_	537	C	T	C	T	3	S
gi|219112199|ref|XP_002177851.1|	predicted protein [Phaeodactylum tricornutum CCAP 1055/1]	SNIP1	K13108	_	567	T	I	T	I	3	S
gi|219112199|ref|XP_002177851.1|	predicted protein [Phaeodactylum tricornutum CCAP 1055/1]	SNIP1	K13108	_	633	G	G	G	G	3	S
gi|219112199|ref|XP_002177851.1|	predicted protein [Phaeodactylum tricornutum CCAP 1055/1]	SNIP1	K13108	_	636	A	N	A	N	3	S
gi|219112199|ref|XP_002177851.1|	predicted protein [Phaeodactylum tricornutum CCAP 1055/1]	SNIP1	K13108	_	810	C	P	C	P	3	S
gi|219112199|ref|XP_002177851.1|	predicted protein [Phaeodactylum tricornutum CCAP 1055/1]	SNIP1	K13108	_	813	C	S	C	S	3	S
gi|219112199|ref|XP_002177851.1|	predicted protein [Phaeodactylum tricornutum CCAP 1055/1]	SNIP1	K13108	_	1053	G	R	G	R	3	S
gi|219112199|ref|XP_002177851.1|	predicted protein [Phaeodactylum tricornutum CCAP 1055/1]	SNIP1	K13108	_	1104	A	H	A	H	3	S
gi|219112199|ref|XP_002177851.1|	predicted protein [Phaeodactylum tricornutum CCAP 1055/1]	SNIP1	K13108	_	1107	T	L	T	L	3	S
gi|219112199|ref|XP_002177851.1|	predicted protein [Phaeodactylum tricornutum CCAP 1055/1]	SNIP1	K13108	_	1155	G	R	G	R	3	S
gi|219112199|ref|XP_002177851.1|	predicted protein [Phaeodactylum tricornutum CCAP 1055/1]	SNIP1	K13108	_	1236	A	*	A	*	3	S
gi|219112199|ref|XP_002177851.1|	predicted protein [Phaeodactylum tricornutum CCAP 1055/1]	SNIP1	K13108	_	1239	T	I	T	I	3	S
gi|219112199|ref|XP_002177851.1|	predicted protein [Phaeodactylum tricornutum CCAP 1055/1]	SNIP1	K13108	_	1302	C	P	C	P	3	S
gi|219112199|ref|XP_002177851.1|	predicted protein [Phaeodactylum tricornutum CCAP 1055/1]	SNIP1	K13108	_	1419	C	T	C	T	3	S
gi|397642925|gb|EJK75542.1|	hypothetical protein THAOC_02730 [Thalassiosira oceanica]	SMYD	K11426	GO:0046872	84	T	F	T	F	3	S
gi|397642925|gb|EJK75542.1|	hypothetical protein THAOC_02730 [Thalassiosira oceanica]	SMYD	K11426	GO:0046872	108	T	L	T	L	3	S
gi|397642925|gb|EJK75542.1|	hypothetical protein THAOC_02730 [Thalassiosira oceanica]	SMYD	K11426	GO:0046872	111	A	K	A	K	3	S
gi|397642925|gb|EJK75542.1|	hypothetical protein THAOC_02730 [Thalassiosira oceanica]	SMYD	K11426	GO:0046872	150	A	D	A	D	3	S
gi|397642925|gb|EJK75542.1|	hypothetical protein THAOC_02730 [Thalassiosira oceanica]	SMYD	K11426	GO:0046872	294	T	V	T	V	3	S
gi|397642925|gb|EJK75542.1|	hypothetical protein THAOC_02730 [Thalassiosira oceanica]	SMYD	K11426	GO:0046872	297	A	N	A	N	3	S
gi|397642925|gb|EJK75542.1|	hypothetical protein THAOC_02730 [Thalassiosira oceanica]	SMYD	K11426	GO:0046872	345	A	E	A	E	3	S
gi|397642925|gb|EJK75542.1|	hypothetical protein THAOC_02730 [Thalassiosira oceanica]	SMYD	K11426	GO:0046872	417	C	T	C	T	3	S
gi|397642925|gb|EJK75542.1|	hypothetical protein THAOC_02730 [Thalassiosira oceanica]	SMYD	K11426	GO:0046872	483	C	T	C	T	3	S
gi|397642925|gb|EJK75542.1|	hypothetical protein THAOC_02730 [Thalassiosira oceanica]	SMYD	K11426	GO:0046872	546	C	A	C	A	3	S
gi|397642925|gb|EJK75542.1|	hypothetical protein THAOC_02730 [Thalassiosira oceanica]	SMYD	K11426	GO:0046872	549	G	R	G	R	3	S
gi|397642925|gb|EJK75542.1|	hypothetical protein THAOC_02730 [Thalassiosira oceanica]	SMYD	K11426	GO:0046872	579	T	V	T	V	3	S
gi|397642925|gb|EJK75542.1|	hypothetical protein THAOC_02730 [Thalassiosira oceanica]	SMYD	K11426	GO:0046872	618	A	K	A	K	3	S
gi|397642925|gb|EJK75542.1|	hypothetical protein THAOC_02730 [Thalassiosira oceanica]	SMYD	K11426	GO:0046872	642	G	G	G	G	3	S
gi|397642925|gb|EJK75542.1|	hypothetical protein THAOC_02730 [Thalassiosira oceanica]	SMYD	K11426	GO:0046872	648	G	G	G	G	3	S
gi|397642925|gb|EJK75542.1|	hypothetical protein THAOC_02730 [Thalassiosira oceanica]	SMYD	K11426	GO:0046872	663	T	I	T	I	3	S
gi|219120392|ref|XP_002180935.1|	predicted protein [Phaeodactylum tricornutum CCAP 1055/1]	SMARCA5, SNF2H, ISWI	K11654	GO:0006338;GO:0000733;GO:0007420;GO:0008026;GO:0005515;GO:0003682;GO:0016589;GO:0016818;GO:0008094;GO:0003677;GO:0005524;GO:0004386;GO:0016049;GO:0070615;GO:0045893;GO:0036310;GO:0043044;GO:0009553;GO:0090537;GO:0030182;GO:0005634;GO:0000785;GO:0003676;GO:0031491	837	C	A	C	A	3	S
gi|219120392|ref|XP_002180935.1|	predicted protein [Phaeodactylum tricornutum CCAP 1055/1]	SMARCA5, SNF2H, ISWI	K11654	GO:0006338;GO:0000733;GO:0007420;GO:0008026;GO:0005515;GO:0003682;GO:0016589;GO:0016818;GO:0008094;GO:0003677;GO:0005524;GO:0004386;GO:0016049;GO:0070615;GO:0045893;GO:0036310;GO:0043044;GO:0009553;GO:0090537;GO:0030182;GO:0005634;GO:0000785;GO:0003676;GO:0031491	846	G	G	G	G	3	S
gi|219120392|ref|XP_002180935.1|	predicted protein [Phaeodactylum tricornutum CCAP 1055/1]	SMARCA5, SNF2H, ISWI	K11654	GO:0006338;GO:0000733;GO:0007420;GO:0008026;GO:0005515;GO:0003682;GO:0016589;GO:0016818;GO:0008094;GO:0003677;GO:0005524;GO:0004386;GO:0016049;GO:0070615;GO:0045893;GO:0036310;GO:0043044;GO:0009553;GO:0090537;GO:0030182;GO:0005634;GO:0000785;GO:0003676;GO:0031491	912	C	A	C	A	3	S
gi|219120392|ref|XP_002180935.1|	predicted protein [Phaeodactylum tricornutum CCAP 1055/1]	SMARCA5, SNF2H, ISWI	K11654	GO:0006338;GO:0000733;GO:0007420;GO:0008026;GO:0005515;GO:0003682;GO:0016589;GO:0016818;GO:0008094;GO:0003677;GO:0005524;GO:0004386;GO:0016049;GO:0070615;GO:0045893;GO:0036310;GO:0043044;GO:0009553;GO:0090537;GO:0030182;GO:0005634;GO:0000785;GO:0003676;GO:0031491	1434	T	F	T	F	3	S
gi|219120392|ref|XP_002180935.1|	predicted protein [Phaeodactylum tricornutum CCAP 1055/1]	SMARCA5, SNF2H, ISWI	K11654	GO:0006338;GO:0000733;GO:0007420;GO:0008026;GO:0005515;GO:0003682;GO:0016589;GO:0016818;GO:0008094;GO:0003677;GO:0005524;GO:0004386;GO:0016049;GO:0070615;GO:0045893;GO:0036310;GO:0043044;GO:0009553;GO:0090537;GO:0030182;GO:0005634;GO:0000785;GO:0003676;GO:0031491	1875	C	T	C	T	3	S
gi|219120392|ref|XP_002180935.1|	predicted protein [Phaeodactylum tricornutum CCAP 1055/1]	SMARCA5, SNF2H, ISWI	K11654	GO:0006338;GO:0000733;GO:0007420;GO:0008026;GO:0005515;GO:0003682;GO:0016589;GO:0016818;GO:0008094;GO:0003677;GO:0005524;GO:0004386;GO:0016049;GO:0070615;GO:0045893;GO:0036310;GO:0043044;GO:0009553;GO:0090537;GO:0030182;GO:0005634;GO:0000785;GO:0003676;GO:0031491	1977	A	D	A	D	3	S
gi|219120392|ref|XP_002180935.1|	predicted protein [Phaeodactylum tricornutum CCAP 1055/1]	SMARCA5, SNF2H, ISWI	K11654	GO:0006338;GO:0000733;GO:0007420;GO:0008026;GO:0005515;GO:0003682;GO:0016589;GO:0016818;GO:0008094;GO:0003677;GO:0005524;GO:0004386;GO:0016049;GO:0070615;GO:0045893;GO:0036310;GO:0043044;GO:0009553;GO:0090537;GO:0030182;GO:0005634;GO:0000785;GO:0003676;GO:0031491	1998	G	S	G	S	3	S
gi|219120392|ref|XP_002180935.1|	predicted protein [Phaeodactylum tricornutum CCAP 1055/1]	SMARCA5, SNF2H, ISWI	K11654	GO:0006338;GO:0000733;GO:0007420;GO:0008026;GO:0005515;GO:0003682;GO:0016589;GO:0016818;GO:0008094;GO:0003677;GO:0005524;GO:0004386;GO:0016049;GO:0070615;GO:0045893;GO:0036310;GO:0043044;GO:0009553;GO:0090537;GO:0030182;GO:0005634;GO:0000785;GO:0003676;GO:0031491	2004	A	K	A	K	3	S
gi|219120392|ref|XP_002180935.1|	predicted protein [Phaeodactylum tricornutum CCAP 1055/1]	SMARCA5, SNF2H, ISWI	K11654	GO:0006338;GO:0000733;GO:0007420;GO:0008026;GO:0005515;GO:0003682;GO:0016589;GO:0016818;GO:0008094;GO:0003677;GO:0005524;GO:0004386;GO:0016049;GO:0070615;GO:0045893;GO:0036310;GO:0043044;GO:0009553;GO:0090537;GO:0030182;GO:0005634;GO:0000785;GO:0003676;GO:0031491	2094	A	N	A	N	3	S
gi|219120392|ref|XP_002180935.1|	predicted protein [Phaeodactylum tricornutum CCAP 1055/1]	SMARCA5, SNF2H, ISWI	K11654	GO:0006338;GO:0000733;GO:0007420;GO:0008026;GO:0005515;GO:0003682;GO:0016589;GO:0016818;GO:0008094;GO:0003677;GO:0005524;GO:0004386;GO:0016049;GO:0070615;GO:0045893;GO:0036310;GO:0043044;GO:0009553;GO:0090537;GO:0030182;GO:0005634;GO:0000785;GO:0003676;GO:0031491	2148	A	K	A	K	3	S
gi|219120392|ref|XP_002180935.1|	predicted protein [Phaeodactylum tricornutum CCAP 1055/1]	SMARCA5, SNF2H, ISWI	K11654	GO:0006338;GO:0000733;GO:0007420;GO:0008026;GO:0005515;GO:0003682;GO:0016589;GO:0016818;GO:0008094;GO:0003677;GO:0005524;GO:0004386;GO:0016049;GO:0070615;GO:0045893;GO:0036310;GO:0043044;GO:0009553;GO:0090537;GO:0030182;GO:0005634;GO:0000785;GO:0003676;GO:0031491	2172	T	V	T	V	3	S
gi|219120392|ref|XP_002180935.1|	predicted protein [Phaeodactylum tricornutum CCAP 1055/1]	SMARCA5, SNF2H, ISWI	K11654	GO:0006338;GO:0000733;GO:0007420;GO:0008026;GO:0005515;GO:0003682;GO:0016589;GO:0016818;GO:0008094;GO:0003677;GO:0005524;GO:0004386;GO:0016049;GO:0070615;GO:0045893;GO:0036310;GO:0043044;GO:0009553;GO:0090537;GO:0030182;GO:0005634;GO:0000785;GO:0003676;GO:0031491	2346	C	T	C	T	3	S
gi|219120392|ref|XP_002180935.1|	predicted protein [Phaeodactylum tricornutum CCAP 1055/1]	SMARCA5, SNF2H, ISWI	K11654	GO:0006338;GO:0000733;GO:0007420;GO:0008026;GO:0005515;GO:0003682;GO:0016589;GO:0016818;GO:0008094;GO:0003677;GO:0005524;GO:0004386;GO:0016049;GO:0070615;GO:0045893;GO:0036310;GO:0043044;GO:0009553;GO:0090537;GO:0030182;GO:0005634;GO:0000785;GO:0003676;GO:0031491	2391	C	A	C	A	3	S
gi|219120392|ref|XP_002180935.1|	predicted protein [Phaeodactylum tricornutum CCAP 1055/1]	SMARCA5, SNF2H, ISWI	K11654	GO:0006338;GO:0000733;GO:0007420;GO:0008026;GO:0005515;GO:0003682;GO:0016589;GO:0016818;GO:0008094;GO:0003677;GO:0005524;GO:0004386;GO:0016049;GO:0070615;GO:0045893;GO:0036310;GO:0043044;GO:0009553;GO:0090537;GO:0030182;GO:0005634;GO:0000785;GO:0003676;GO:0031491	2430	A	E	A	E	3	S
gi|219120392|ref|XP_002180935.1|	predicted protein [Phaeodactylum tricornutum CCAP 1055/1]	SMARCA5, SNF2H, ISWI	K11654	GO:0006338;GO:0000733;GO:0007420;GO:0008026;GO:0005515;GO:0003682;GO:0016589;GO:0016818;GO:0008094;GO:0003677;GO:0005524;GO:0004386;GO:0016049;GO:0070615;GO:0045893;GO:0036310;GO:0043044;GO:0009553;GO:0090537;GO:0030182;GO:0005634;GO:0000785;GO:0003676;GO:0031491	2460	A	D	A	D	3	S
gi|219120392|ref|XP_002180935.1|	predicted protein [Phaeodactylum tricornutum CCAP 1055/1]	SMARCA5, SNF2H, ISWI	K11654	GO:0006338;GO:0000733;GO:0007420;GO:0008026;GO:0005515;GO:0003682;GO:0016589;GO:0016818;GO:0008094;GO:0003677;GO:0005524;GO:0004386;GO:0016049;GO:0070615;GO:0045893;GO:0036310;GO:0043044;GO:0009553;GO:0090537;GO:0030182;GO:0005634;GO:0000785;GO:0003676;GO:0031491	2475	C	T	C	T	3	S
gi|219120392|ref|XP_002180935.1|	predicted protein [Phaeodactylum tricornutum CCAP 1055/1]	SMARCA5, SNF2H, ISWI	K11654	GO:0006338;GO:0000733;GO:0007420;GO:0008026;GO:0005515;GO:0003682;GO:0016589;GO:0016818;GO:0008094;GO:0003677;GO:0005524;GO:0004386;GO:0016049;GO:0070615;GO:0045893;GO:0036310;GO:0043044;GO:0009553;GO:0090537;GO:0030182;GO:0005634;GO:0000785;GO:0003676;GO:0031491	2511	A	E	A	E	3	S
gi|219120392|ref|XP_002180935.1|	predicted protein [Phaeodactylum tricornutum CCAP 1055/1]	SMARCA5, SNF2H, ISWI	K11654	GO:0006338;GO:0000733;GO:0007420;GO:0008026;GO:0005515;GO:0003682;GO:0016589;GO:0016818;GO:0008094;GO:0003677;GO:0005524;GO:0004386;GO:0016049;GO:0070615;GO:0045893;GO:0036310;GO:0043044;GO:0009553;GO:0090537;GO:0030182;GO:0005634;GO:0000785;GO:0003676;GO:0031491	2988	A	Q	A	Q	3	S
gi|219120392|ref|XP_002180935.1|	predicted protein [Phaeodactylum tricornutum CCAP 1055/1]	SMARCA5, SNF2H, ISWI	K11654	GO:0006338;GO:0000733;GO:0007420;GO:0008026;GO:0005515;GO:0003682;GO:0016589;GO:0016818;GO:0008094;GO:0003677;GO:0005524;GO:0004386;GO:0016049;GO:0070615;GO:0045893;GO:0036310;GO:0043044;GO:0009553;GO:0090537;GO:0030182;GO:0005634;GO:0000785;GO:0003676;GO:0031491	3024	G	R	G	R	3	S
gi|219120392|ref|XP_002180935.1|	predicted protein [Phaeodactylum tricornutum CCAP 1055/1]	SMARCA5, SNF2H, ISWI	K11654	GO:0006338;GO:0000733;GO:0007420;GO:0008026;GO:0005515;GO:0003682;GO:0016589;GO:0016818;GO:0008094;GO:0003677;GO:0005524;GO:0004386;GO:0016049;GO:0070615;GO:0045893;GO:0036310;GO:0043044;GO:0009553;GO:0090537;GO:0030182;GO:0005634;GO:0000785;GO:0003676;GO:0031491	3033	C	S	C	S	3	S
gi|219120392|ref|XP_002180935.1|	predicted protein [Phaeodactylum tricornutum CCAP 1055/1]	SMARCA5, SNF2H, ISWI	K11654	GO:0006338;GO:0000733;GO:0007420;GO:0008026;GO:0005515;GO:0003682;GO:0016589;GO:0016818;GO:0008094;GO:0003677;GO:0005524;GO:0004386;GO:0016049;GO:0070615;GO:0045893;GO:0036310;GO:0043044;GO:0009553;GO:0090537;GO:0030182;GO:0005634;GO:0000785;GO:0003676;GO:0031491	3105	C	S	C	S	3	S
gi|219120392|ref|XP_002180935.1|	predicted protein [Phaeodactylum tricornutum CCAP 1055/1]	SMARCA5, SNF2H, ISWI	K11654	GO:0006338;GO:0000733;GO:0007420;GO:0008026;GO:0005515;GO:0003682;GO:0016589;GO:0016818;GO:0008094;GO:0003677;GO:0005524;GO:0004386;GO:0016049;GO:0070615;GO:0045893;GO:0036310;GO:0043044;GO:0009553;GO:0090537;GO:0030182;GO:0005634;GO:0000785;GO:0003676;GO:0031491	3123	G	R	G	R	3	S
gi|219120392|ref|XP_002180935.1|	predicted protein [Phaeodactylum tricornutum CCAP 1055/1]	SMARCA5, SNF2H, ISWI	K11654	GO:0006338;GO:0000733;GO:0007420;GO:0008026;GO:0005515;GO:0003682;GO:0016589;GO:0016818;GO:0008094;GO:0003677;GO:0005524;GO:0004386;GO:0016049;GO:0070615;GO:0045893;GO:0036310;GO:0043044;GO:0009553;GO:0090537;GO:0030182;GO:0005634;GO:0000785;GO:0003676;GO:0031491	3162	T	F	T	F	3	S
gi|219120392|ref|XP_002180935.1|	predicted protein [Phaeodactylum tricornutum CCAP 1055/1]	SMARCA5, SNF2H, ISWI	K11654	GO:0006338;GO:0000733;GO:0007420;GO:0008026;GO:0005515;GO:0003682;GO:0016589;GO:0016818;GO:0008094;GO:0003677;GO:0005524;GO:0004386;GO:0016049;GO:0070615;GO:0045893;GO:0036310;GO:0043044;GO:0009553;GO:0090537;GO:0030182;GO:0005634;GO:0000785;GO:0003676;GO:0031491	3201	A	N	A	N	3	S
gi|219111545|ref|XP_002177524.1|	predicted protein [Phaeodactylum tricornutum CCAP 1055/1]	SLC50A, SWEET	K15382	GO:0016020;GO:0006810	27	T	F	T	F	3	S
gi|219111545|ref|XP_002177524.1|	predicted protein [Phaeodactylum tricornutum CCAP 1055/1]	SLC50A, SWEET	K15382	GO:0016020;GO:0006810	72	T	V	T	V	3	S
gi|219111545|ref|XP_002177524.1|	predicted protein [Phaeodactylum tricornutum CCAP 1055/1]	SLC50A, SWEET	K15382	GO:0016020;GO:0006810	75	T	F	T	F	3	S
gi|219111545|ref|XP_002177524.1|	predicted protein [Phaeodactylum tricornutum CCAP 1055/1]	SLC50A, SWEET	K15382	GO:0016020;GO:0006810	78	C	S	C	S	3	S
gi|219111545|ref|XP_002177524.1|	predicted protein [Phaeodactylum tricornutum CCAP 1055/1]	SLC50A, SWEET	K15382	GO:0016020;GO:0006810	216	A	Q	A	Q	3	S
gi|219111545|ref|XP_002177524.1|	predicted protein [Phaeodactylum tricornutum CCAP 1055/1]	SLC50A, SWEET	K15382	GO:0016020;GO:0006810	219	A	K	A	K	3	S
gi|219111545|ref|XP_002177524.1|	predicted protein [Phaeodactylum tricornutum CCAP 1055/1]	SLC50A, SWEET	K15382	GO:0016020;GO:0006810	291	C	T	C	T	3	S
gi|219111545|ref|XP_002177524.1|	predicted protein [Phaeodactylum tricornutum CCAP 1055/1]	SLC50A, SWEET	K15382	GO:0016020;GO:0006810	321	A	Y	A	Y	3	S
gi|219111545|ref|XP_002177524.1|	predicted protein [Phaeodactylum tricornutum CCAP 1055/1]	SLC50A, SWEET	K15382	GO:0016020;GO:0006810	324	T	F	T	F	3	S
gi|219111545|ref|XP_002177524.1|	predicted protein [Phaeodactylum tricornutum CCAP 1055/1]	SLC50A, SWEET	K15382	GO:0016020;GO:0006810	396	C	S	C	S	3	S
gi|219111545|ref|XP_002177524.1|	predicted protein [Phaeodactylum tricornutum CCAP 1055/1]	SLC50A, SWEET	K15382	GO:0016020;GO:0006810	420	T	F	T	F	3	S
gi|219111545|ref|XP_002177524.1|	predicted protein [Phaeodactylum tricornutum CCAP 1055/1]	SLC50A, SWEET	K15382	GO:0016020;GO:0006810	516	C	P	C	P	3	S
gi|219111545|ref|XP_002177524.1|	predicted protein [Phaeodactylum tricornutum CCAP 1055/1]	SLC50A, SWEET	K15382	GO:0016020;GO:0006810	522	C	T	C	T	3	S
gi|219111545|ref|XP_002177524.1|	predicted protein [Phaeodactylum tricornutum CCAP 1055/1]	SLC50A, SWEET	K15382	GO:0016020;GO:0006810	627	G	G	G	G	3	S
gi|219111545|ref|XP_002177524.1|	predicted protein [Phaeodactylum tricornutum CCAP 1055/1]	SLC50A, SWEET	K15382	GO:0016020;GO:0006810	636	T	V	T	V	3	S
gi|219111545|ref|XP_002177524.1|	predicted protein [Phaeodactylum tricornutum CCAP 1055/1]	SLC50A, SWEET	K15382	GO:0016020;GO:0006810	651	A	E	A	E	3	S
gi|219111545|ref|XP_002177524.1|	predicted protein [Phaeodactylum tricornutum CCAP 1055/1]	SLC50A, SWEET	K15382	GO:0016020;GO:0006810	657	G	R	G	R	3	S
gi|219127060|ref|XP_002183762.1|	predicted protein [Phaeodactylum tricornutum CCAP 1055/1]	SLC38A11	K14997	GO:0016020;GO:0016021	924	C	A	C	A	3	S
gi|219127060|ref|XP_002183762.1|	predicted protein [Phaeodactylum tricornutum CCAP 1055/1]	SLC38A11	K14997	GO:0016020;GO:0016021	951	T	F	T	F	3	S
gi|219127060|ref|XP_002183762.1|	predicted protein [Phaeodactylum tricornutum CCAP 1055/1]	SLC38A11	K14997	GO:0016020;GO:0016021	969	T	L	T	L	3	S
gi|219127060|ref|XP_002183762.1|	predicted protein [Phaeodactylum tricornutum CCAP 1055/1]	SLC38A11	K14997	GO:0016020;GO:0016021	972	G	C	G	C	3	S
gi|219127060|ref|XP_002183762.1|	predicted protein [Phaeodactylum tricornutum CCAP 1055/1]	SLC38A11	K14997	GO:0016020;GO:0016021	984	G	G	G	G	3	S
gi|219127060|ref|XP_002183762.1|	predicted protein [Phaeodactylum tricornutum CCAP 1055/1]	SLC38A11	K14997	GO:0016020;GO:0016021	987	G	G	G	G	3	S
gi|219127060|ref|XP_002183762.1|	predicted protein [Phaeodactylum tricornutum CCAP 1055/1]	SLC38A11	K14997	GO:0016020;GO:0016021	1032	C	S	C	S	3	S
gi|219127060|ref|XP_002183762.1|	predicted protein [Phaeodactylum tricornutum CCAP 1055/1]	SLC38A11	K14997	GO:0016020;GO:0016021	1056	C	A	C	A	3	S
gi|219127060|ref|XP_002183762.1|	predicted protein [Phaeodactylum tricornutum CCAP 1055/1]	SLC38A11	K14997	GO:0016020;GO:0016021	1083	G	S	G	S	3	S
gi|219127060|ref|XP_002183762.1|	predicted protein [Phaeodactylum tricornutum CCAP 1055/1]	SLC38A11	K14997	GO:0016020;GO:0016021	1242	C	A	C	A	3	S
gi|219127060|ref|XP_002183762.1|	predicted protein [Phaeodactylum tricornutum CCAP 1055/1]	SLC38A11	K14997	GO:0016020;GO:0016021	1251	C	P	C	P	3	S
gi|219127060|ref|XP_002183762.1|	predicted protein [Phaeodactylum tricornutum CCAP 1055/1]	SLC38A11	K14997	GO:0016020;GO:0016021	1311	G	S	G	S	3	S
gi|219127060|ref|XP_002183762.1|	predicted protein [Phaeodactylum tricornutum CCAP 1055/1]	SLC38A11	K14997	GO:0016020;GO:0016021	1347	T	L	T	L	3	S
gi|219127060|ref|XP_002183762.1|	predicted protein [Phaeodactylum tricornutum CCAP 1055/1]	SLC38A11	K14997	GO:0016020;GO:0016021	1650	T	V	T	V	3	S
gi|219127060|ref|XP_002183762.1|	predicted protein [Phaeodactylum tricornutum CCAP 1055/1]	SLC38A11	K14997	GO:0016020;GO:0016021	1653	G	R	G	R	3	S
gi|219127060|ref|XP_002183762.1|	predicted protein [Phaeodactylum tricornutum CCAP 1055/1]	SLC38A11	K14997	GO:0016020;GO:0016021	1674	C	S	C	S	3	S
gi|219112741|ref|XP_002178122.1|	triose phosphate/phosphate translocator [Phaeodactylum tricornutum CCAP 1055/1]	SLC35E1	K15283	GO:0016021	1005	G	R	G	R	3	S
gi|219113353|ref|XP_002186260.1|	predicted protein [Phaeodactylum tricornutum CCAP 1055/1]	SLC35A1_2_3	K15272	GO:0016020;GO:0008643;GO:0000139;GO:0016021;GO:0005351	87	T	L	T	L	3	S
gi|219113353|ref|XP_002186260.1|	predicted protein [Phaeodactylum tricornutum CCAP 1055/1]	SLC35A1_2_3	K15272	GO:0016020;GO:0008643;GO:0000139;GO:0016021;GO:0005351	399	T	V	T	V	3	S
gi|219113353|ref|XP_002186260.1|	predicted protein [Phaeodactylum tricornutum CCAP 1055/1]	SLC35A1_2_3	K15272	GO:0016020;GO:0008643;GO:0000139;GO:0016021;GO:0005351	423	A	E	A	E	3	S
gi|302843806|ref|XP_002953444.1|	hypothetical protein VOLCADRAFT_63715 [Volvox carteri f. nagariensis]	SLC30A2, ZNT2	K14689	_	1245	C	P	C	P	3	S
gi|302843806|ref|XP_002953444.1|	hypothetical protein VOLCADRAFT_63715 [Volvox carteri f. nagariensis]	SLC30A2, ZNT2	K14689	_	1269	G	C	G	C	3	S
gi|302843806|ref|XP_002953444.1|	hypothetical protein VOLCADRAFT_63715 [Volvox carteri f. nagariensis]	SLC30A2, ZNT2	K14689	_	1320	C	T	C	T	3	S
gi|219111307|ref|XP_002177405.1|	predicted protein [Phaeodactylum tricornutum CCAP 1055/1]	SLC25A42	K15085	GO:0000295;GO:0015868;GO:0051503;GO:0005346;GO:0015211;GO:0015860;GO:0016021;GO:0055085;GO:0015711;GO:0008514	690	T	V	T	V	3	S
gi|219111307|ref|XP_002177405.1|	predicted protein [Phaeodactylum tricornutum CCAP 1055/1]	SLC25A42	K15085	GO:0000295;GO:0015868;GO:0051503;GO:0005346;GO:0015211;GO:0015860;GO:0016021;GO:0055085;GO:0015711;GO:0008514	735	C	T	C	T	3	S
gi|219111307|ref|XP_002177405.1|	predicted protein [Phaeodactylum tricornutum CCAP 1055/1]	SLC25A42	K15085	GO:0000295;GO:0015868;GO:0051503;GO:0005346;GO:0015211;GO:0015860;GO:0016021;GO:0055085;GO:0015711;GO:0008514	915	C	T	C	T	3	S
gi|219111307|ref|XP_002177405.1|	predicted protein [Phaeodactylum tricornutum CCAP 1055/1]	SLC25A42	K15085	GO:0000295;GO:0015868;GO:0051503;GO:0005346;GO:0015211;GO:0015860;GO:0016021;GO:0055085;GO:0015711;GO:0008514	924	A	Y	A	Y	3	S
gi|219111307|ref|XP_002177405.1|	predicted protein [Phaeodactylum tricornutum CCAP 1055/1]	SLC25A42	K15085	GO:0000295;GO:0015868;GO:0051503;GO:0005346;GO:0015211;GO:0015860;GO:0016021;GO:0055085;GO:0015711;GO:0008514	948	T	F	T	F	3	S
gi|219111307|ref|XP_002177405.1|	predicted protein [Phaeodactylum tricornutum CCAP 1055/1]	SLC25A42	K15085	GO:0000295;GO:0015868;GO:0051503;GO:0005346;GO:0015211;GO:0015860;GO:0016021;GO:0055085;GO:0015711;GO:0008514	1047	C	T	C	T	3	S
gi|219111307|ref|XP_002177405.1|	predicted protein [Phaeodactylum tricornutum CCAP 1055/1]	SLC25A42	K15085	GO:0000295;GO:0015868;GO:0051503;GO:0005346;GO:0015211;GO:0015860;GO:0016021;GO:0055085;GO:0015711;GO:0008514	1110	C	P	C	P	3	S
gi|219115469|ref|XP_002178530.1|	predicted protein [Phaeodactylum tricornutum CCAP 1055/1]	SLC25A28_37, MFRN	K15113	GO:0016021;GO:0006810	45	C	T	C	T	3	S
gi|219115469|ref|XP_002178530.1|	predicted protein [Phaeodactylum tricornutum CCAP 1055/1]	SLC25A28_37, MFRN	K15113	GO:0016021;GO:0006810	63	C	A	C	A	3	S
gi|219115469|ref|XP_002178530.1|	predicted protein [Phaeodactylum tricornutum CCAP 1055/1]	SLC25A28_37, MFRN	K15113	GO:0016021;GO:0006810	90	C	S	C	S	3	S
gi|219115469|ref|XP_002178530.1|	predicted protein [Phaeodactylum tricornutum CCAP 1055/1]	SLC25A28_37, MFRN	K15113	GO:0016021;GO:0006810	108	A	E	A	E	3	S
gi|219115469|ref|XP_002178530.1|	predicted protein [Phaeodactylum tricornutum CCAP 1055/1]	SLC25A28_37, MFRN	K15113	GO:0016021;GO:0006810	117	A	K	A	K	3	S
gi|219115469|ref|XP_002178530.1|	predicted protein [Phaeodactylum tricornutum CCAP 1055/1]	SLC25A28_37, MFRN	K15113	GO:0016021;GO:0006810	153	C	S	C	S	3	S
gi|219115469|ref|XP_002178530.1|	predicted protein [Phaeodactylum tricornutum CCAP 1055/1]	SLC25A28_37, MFRN	K15113	GO:0016021;GO:0006810	180	A	N	A	N	3	S
gi|219115469|ref|XP_002178530.1|	predicted protein [Phaeodactylum tricornutum CCAP 1055/1]	SLC25A28_37, MFRN	K15113	GO:0016021;GO:0006810	204	G	G	G	G	3	S
gi|219115469|ref|XP_002178530.1|	predicted protein [Phaeodactylum tricornutum CCAP 1055/1]	SLC25A28_37, MFRN	K15113	GO:0016021;GO:0006810	207	C	A	C	A	3	S
gi|219115469|ref|XP_002178530.1|	predicted protein [Phaeodactylum tricornutum CCAP 1055/1]	SLC25A28_37, MFRN	K15113	GO:0016021;GO:0006810	255	G	G	G	G	3	S
gi|219115469|ref|XP_002178530.1|	predicted protein [Phaeodactylum tricornutum CCAP 1055/1]	SLC25A28_37, MFRN	K15113	GO:0016021;GO:0006810	294	G	G	G	G	3	S
gi|219115469|ref|XP_002178530.1|	predicted protein [Phaeodactylum tricornutum CCAP 1055/1]	SLC25A28_37, MFRN	K15113	GO:0016021;GO:0006810	303	T	V	T	V	3	S
gi|219115469|ref|XP_002178530.1|	predicted protein [Phaeodactylum tricornutum CCAP 1055/1]	SLC25A28_37, MFRN	K15113	GO:0016021;GO:0006810	732	C	S	C	S	3	S
gi|219115469|ref|XP_002178530.1|	predicted protein [Phaeodactylum tricornutum CCAP 1055/1]	SLC25A28_37, MFRN	K15113	GO:0016021;GO:0006810	744	G	R	G	R	3	S
gi|219115399|ref|XP_002178495.1|	predicted protein [Phaeodactylum tricornutum CCAP 1055/1]	SLC25A20_29, CACT, CACL, CRC1	K15109	GO:0016020	264	C	A	C	A	3	S
gi|397571397|gb|EJK47777.1|	hypothetical protein THAOC_33485 [Thalassiosira oceanica]	SLC25A20_29, CACT, CACL, CRC1	K15109	GO:0016021;GO:0055085	75	C	T	C	T	3	S
gi|397571397|gb|EJK47777.1|	hypothetical protein THAOC_33485 [Thalassiosira oceanica]	SLC25A20_29, CACT, CACL, CRC1	K15109	GO:0016021;GO:0055085	138	T	I	T	I	3	S
gi|397571397|gb|EJK47777.1|	hypothetical protein THAOC_33485 [Thalassiosira oceanica]	SLC25A20_29, CACT, CACL, CRC1	K15109	GO:0016021;GO:0055085	207	T	V	T	V	3	S
gi|397571397|gb|EJK47777.1|	hypothetical protein THAOC_33485 [Thalassiosira oceanica]	SLC25A20_29, CACT, CACL, CRC1	K15109	GO:0016021;GO:0055085	231	A	D	A	D	3	S
gi|397571397|gb|EJK47777.1|	hypothetical protein THAOC_33485 [Thalassiosira oceanica]	SLC25A20_29, CACT, CACL, CRC1	K15109	GO:0016021;GO:0055085	243	T	V	T	V	3	S
gi|397571397|gb|EJK47777.1|	hypothetical protein THAOC_33485 [Thalassiosira oceanica]	SLC25A20_29, CACT, CACL, CRC1	K15109	GO:0016021;GO:0055085	255	C	A	C	A	3	S
gi|397571397|gb|EJK47777.1|	hypothetical protein THAOC_33485 [Thalassiosira oceanica]	SLC25A20_29, CACT, CACL, CRC1	K15109	GO:0016021;GO:0055085	258	T	V	T	V	3	S
gi|397571397|gb|EJK47777.1|	hypothetical protein THAOC_33485 [Thalassiosira oceanica]	SLC25A20_29, CACT, CACL, CRC1	K15109	GO:0016021;GO:0055085	270	C	P	C	P	3	S
gi|397571397|gb|EJK47777.1|	hypothetical protein THAOC_33485 [Thalassiosira oceanica]	SLC25A20_29, CACT, CACL, CRC1	K15109	GO:0016021;GO:0055085	276	A	D	A	D	3	S
gi|397571397|gb|EJK47777.1|	hypothetical protein THAOC_33485 [Thalassiosira oceanica]	SLC25A20_29, CACT, CACL, CRC1	K15109	GO:0016021;GO:0055085	279	C	T	C	T	3	S
gi|397571397|gb|EJK47777.1|	hypothetical protein THAOC_33485 [Thalassiosira oceanica]	SLC25A20_29, CACT, CACL, CRC1	K15109	GO:0016021;GO:0055085	285	A	K	A	K	3	S
gi|397571397|gb|EJK47777.1|	hypothetical protein THAOC_33485 [Thalassiosira oceanica]	SLC25A20_29, CACT, CACL, CRC1	K15109	GO:0016021;GO:0055085	288	T	V	T	V	3	S
gi|397571397|gb|EJK47777.1|	hypothetical protein THAOC_33485 [Thalassiosira oceanica]	SLC25A20_29, CACT, CACL, CRC1	K15109	GO:0016021;GO:0055085	300	C	T	C	T	3	S
gi|397571397|gb|EJK47777.1|	hypothetical protein THAOC_33485 [Thalassiosira oceanica]	SLC25A20_29, CACT, CACL, CRC1	K15109	GO:0016021;GO:0055085	348	T	I	T	I	3	S
gi|397571397|gb|EJK47777.1|	hypothetical protein THAOC_33485 [Thalassiosira oceanica]	SLC25A20_29, CACT, CACL, CRC1	K15109	GO:0016021;GO:0055085	360	A	Y	A	Y	3	S
gi|397571397|gb|EJK47777.1|	hypothetical protein THAOC_33485 [Thalassiosira oceanica]	SLC25A20_29, CACT, CACL, CRC1	K15109	GO:0016021;GO:0055085	381	G	G	G	G	3	S
gi|397571397|gb|EJK47777.1|	hypothetical protein THAOC_33485 [Thalassiosira oceanica]	SLC25A20_29, CACT, CACL, CRC1	K15109	GO:0016021;GO:0055085	399	T	V	T	V	3	S
gi|397571397|gb|EJK47777.1|	hypothetical protein THAOC_33485 [Thalassiosira oceanica]	SLC25A20_29, CACT, CACL, CRC1	K15109	GO:0016021;GO:0055085	402	G	G	G	G	3	S
gi|397571397|gb|EJK47777.1|	hypothetical protein THAOC_33485 [Thalassiosira oceanica]	SLC25A20_29, CACT, CACL, CRC1	K15109	GO:0016021;GO:0055085	420	A	Y	A	Y	3	S
gi|397571397|gb|EJK47777.1|	hypothetical protein THAOC_33485 [Thalassiosira oceanica]	SLC25A20_29, CACT, CACL, CRC1	K15109	GO:0016021;GO:0055085	432	G	G	G	G	3	S
gi|397571397|gb|EJK47777.1|	hypothetical protein THAOC_33485 [Thalassiosira oceanica]	SLC25A20_29, CACT, CACL, CRC1	K15109	GO:0016021;GO:0055085	474	T	L	T	L	3	S
gi|397571397|gb|EJK47777.1|	hypothetical protein THAOC_33485 [Thalassiosira oceanica]	SLC25A20_29, CACT, CACL, CRC1	K15109	GO:0016021;GO:0055085	534	T	I	T	I	3	S
gi|397571397|gb|EJK47777.1|	hypothetical protein THAOC_33485 [Thalassiosira oceanica]	SLC25A20_29, CACT, CACL, CRC1	K15109	GO:0016021;GO:0055085	594	T	V	T	V	3	S
gi|397571397|gb|EJK47777.1|	hypothetical protein THAOC_33485 [Thalassiosira oceanica]	SLC25A20_29, CACT, CACL, CRC1	K15109	GO:0016021;GO:0055085	603	C	P	C	P	3	S
gi|397571397|gb|EJK47777.1|	hypothetical protein THAOC_33485 [Thalassiosira oceanica]	SLC25A20_29, CACT, CACL, CRC1	K15109	GO:0016021;GO:0055085	627	A	Q	A	Q	3	S
gi|397571397|gb|EJK47777.1|	hypothetical protein THAOC_33485 [Thalassiosira oceanica]	SLC25A20_29, CACT, CACL, CRC1	K15109	GO:0016021;GO:0055085	636	A	K	A	K	3	S
gi|397571397|gb|EJK47777.1|	hypothetical protein THAOC_33485 [Thalassiosira oceanica]	SLC25A20_29, CACT, CACL, CRC1	K15109	GO:0016021;GO:0055085	657	T	I	T	I	3	S
gi|397571397|gb|EJK47777.1|	hypothetical protein THAOC_33485 [Thalassiosira oceanica]	SLC25A20_29, CACT, CACL, CRC1	K15109	GO:0016021;GO:0055085	672	G	G	G	G	3	S
gi|397571397|gb|EJK47777.1|	hypothetical protein THAOC_33485 [Thalassiosira oceanica]	SLC25A20_29, CACT, CACL, CRC1	K15109	GO:0016021;GO:0055085	684	A	Y	A	Y	3	S
gi|397571397|gb|EJK47777.1|	hypothetical protein THAOC_33485 [Thalassiosira oceanica]	SLC25A20_29, CACT, CACL, CRC1	K15109	GO:0016021;GO:0055085	717	T	L	T	L	3	S
gi|397571397|gb|EJK47777.1|	hypothetical protein THAOC_33485 [Thalassiosira oceanica]	SLC25A20_29, CACT, CACL, CRC1	K15109	GO:0016021;GO:0055085	723	G	C	G	C	3	S
gi|397571397|gb|EJK47777.1|	hypothetical protein THAOC_33485 [Thalassiosira oceanica]	SLC25A20_29, CACT, CACL, CRC1	K15109	GO:0016021;GO:0055085	825	A	Q	A	Q	3	S
gi|397571397|gb|EJK47777.1|	hypothetical protein THAOC_33485 [Thalassiosira oceanica]	SLC25A20_29, CACT, CACL, CRC1	K15109	GO:0016021;GO:0055085	861	G	G	G	G	3	S
gi|397571397|gb|EJK47777.1|	hypothetical protein THAOC_33485 [Thalassiosira oceanica]	SLC25A20_29, CACT, CACL, CRC1	K15109	GO:0016021;GO:0055085	873	T	I	T	I	3	S
gi|397571397|gb|EJK47777.1|	hypothetical protein THAOC_33485 [Thalassiosira oceanica]	SLC25A20_29, CACT, CACL, CRC1	K15109	GO:0016021;GO:0055085	891	A	K	A	K	3	S
gi|397571397|gb|EJK47777.1|	hypothetical protein THAOC_33485 [Thalassiosira oceanica]	SLC25A20_29, CACT, CACL, CRC1	K15109	GO:0016021;GO:0055085	909	C	A	C	A	3	S
gi|397571397|gb|EJK47777.1|	hypothetical protein THAOC_33485 [Thalassiosira oceanica]	SLC25A20_29, CACT, CACL, CRC1	K15109	GO:0016021;GO:0055085	948	C	S	C	S	3	S
gi|397571397|gb|EJK47777.1|	hypothetical protein THAOC_33485 [Thalassiosira oceanica]	SLC25A20_29, CACT, CACL, CRC1	K15109	GO:0016021;GO:0055085	975	T	I	T	I	3	S
gi|397571397|gb|EJK47777.1|	hypothetical protein THAOC_33485 [Thalassiosira oceanica]	SLC25A20_29, CACT, CACL, CRC1	K15109	GO:0016021;GO:0055085	981	G	R	G	R	3	S
gi|397571397|gb|EJK47777.1|	hypothetical protein THAOC_33485 [Thalassiosira oceanica]	SLC25A20_29, CACT, CACL, CRC1	K15109	GO:0016021;GO:0055085	987	T	V	T	V	3	S
gi|397571397|gb|EJK47777.1|	hypothetical protein THAOC_33485 [Thalassiosira oceanica]	SLC25A20_29, CACT, CACL, CRC1	K15109	GO:0016021;GO:0055085	996	T	V	T	V	3	S
gi|397571397|gb|EJK47777.1|	hypothetical protein THAOC_33485 [Thalassiosira oceanica]	SLC25A20_29, CACT, CACL, CRC1	K15109	GO:0016021;GO:0055085	1035	T	V	T	V	3	S
gi|219111133|ref|XP_002177318.1|	predicted protein [Phaeodactylum tricornutum CCAP 1055/1]	SLC25A11, OGC	K15104	GO:0016021;GO:0006810	903	C	P	C	P	3	S
gi|219111133|ref|XP_002177318.1|	predicted protein [Phaeodactylum tricornutum CCAP 1055/1]	SLC25A11, OGC	K15104	GO:0016021;GO:0006810	924	G	G	G	G	3	S
gi|219111133|ref|XP_002177318.1|	predicted protein [Phaeodactylum tricornutum CCAP 1055/1]	SLC25A11, OGC	K15104	GO:0016021;GO:0006810	972	A	Y	A	Y	3	S
gi|219111133|ref|XP_002177318.1|	predicted protein [Phaeodactylum tricornutum CCAP 1055/1]	SLC25A11, OGC	K15104	GO:0016021;GO:0006810	975	C	T	C	T	3	S
gi|397613553|gb|EJK62287.1|	hypothetical protein THAOC_17105 [Thalassiosira oceanica]	SLC25A11, OGC	K15104	GO:0016020;GO:0006810	63	T	F	T	F	3	S
gi|397613553|gb|EJK62287.1|	hypothetical protein THAOC_17105 [Thalassiosira oceanica]	SLC25A11, OGC	K15104	GO:0016020;GO:0006810	72	T	L	T	L	3	S
gi|397613553|gb|EJK62287.1|	hypothetical protein THAOC_17105 [Thalassiosira oceanica]	SLC25A11, OGC	K15104	GO:0016020;GO:0006810	138	C	S	C	S	3	S
gi|397613553|gb|EJK62287.1|	hypothetical protein THAOC_17105 [Thalassiosira oceanica]	SLC25A11, OGC	K15104	GO:0016020;GO:0006810	186	C	P	C	P	3	S
gi|397613553|gb|EJK62287.1|	hypothetical protein THAOC_17105 [Thalassiosira oceanica]	SLC25A11, OGC	K15104	GO:0016020;GO:0006810	219	C	P	C	P	3	S
gi|397613553|gb|EJK62287.1|	hypothetical protein THAOC_17105 [Thalassiosira oceanica]	SLC25A11, OGC	K15104	GO:0016020;GO:0006810	294	A	K	A	K	3	S
gi|397613553|gb|EJK62287.1|	hypothetical protein THAOC_17105 [Thalassiosira oceanica]	SLC25A11, OGC	K15104	GO:0016020;GO:0006810	366	C	A	C	A	3	S
gi|397613553|gb|EJK62287.1|	hypothetical protein THAOC_17105 [Thalassiosira oceanica]	SLC25A11, OGC	K15104	GO:0016020;GO:0006810	450	G	G	G	G	3	S
gi|397613553|gb|EJK62287.1|	hypothetical protein THAOC_17105 [Thalassiosira oceanica]	SLC25A11, OGC	K15104	GO:0016020;GO:0006810	492	C	P	C	P	3	S
gi|397613553|gb|EJK62287.1|	hypothetical protein THAOC_17105 [Thalassiosira oceanica]	SLC25A11, OGC	K15104	GO:0016020;GO:0006810	612	C	T	C	T	3	S
gi|397613553|gb|EJK62287.1|	hypothetical protein THAOC_17105 [Thalassiosira oceanica]	SLC25A11, OGC	K15104	GO:0016020;GO:0006810	648	A	Q	A	Q	3	S
gi|397613553|gb|EJK62287.1|	hypothetical protein THAOC_17105 [Thalassiosira oceanica]	SLC25A11, OGC	K15104	GO:0016020;GO:0006810	687	A	H	A	H	3	S
gi|397613553|gb|EJK62287.1|	hypothetical protein THAOC_17105 [Thalassiosira oceanica]	SLC25A11, OGC	K15104	GO:0016020;GO:0006810	702	G	G	G	G	3	S
gi|219129526|ref|XP_002184938.1|	predicted protein [Phaeodactylum tricornutum CCAP 1055/1]	SLC25A1, CTP	K15100	GO:0016021;GO:0055085	138	C	T	C	T	3	S
gi|219129526|ref|XP_002184938.1|	predicted protein [Phaeodactylum tricornutum CCAP 1055/1]	SLC25A1, CTP	K15100	GO:0016021;GO:0055085	189	T	V	T	V	3	S
gi|219129526|ref|XP_002184938.1|	predicted protein [Phaeodactylum tricornutum CCAP 1055/1]	SLC25A1, CTP	K15100	GO:0016021;GO:0055085	192	G	C	G	C	3	S
gi|219129526|ref|XP_002184938.1|	predicted protein [Phaeodactylum tricornutum CCAP 1055/1]	SLC25A1, CTP	K15100	GO:0016021;GO:0055085	210	C	T	C	T	3	S
gi|219129526|ref|XP_002184938.1|	predicted protein [Phaeodactylum tricornutum CCAP 1055/1]	SLC25A1, CTP	K15100	GO:0016021;GO:0055085	333	C	S	C	S	3	S
gi|219129526|ref|XP_002184938.1|	predicted protein [Phaeodactylum tricornutum CCAP 1055/1]	SLC25A1, CTP	K15100	GO:0016021;GO:0055085	348	C	A	C	A	3	S
gi|219129526|ref|XP_002184938.1|	predicted protein [Phaeodactylum tricornutum CCAP 1055/1]	SLC25A1, CTP	K15100	GO:0016021;GO:0055085	351	A	K	A	K	3	S
gi|219129526|ref|XP_002184938.1|	predicted protein [Phaeodactylum tricornutum CCAP 1055/1]	SLC25A1, CTP	K15100	GO:0016021;GO:0055085	372	C	A	C	A	3	S
gi|219129526|ref|XP_002184938.1|	predicted protein [Phaeodactylum tricornutum CCAP 1055/1]	SLC25A1, CTP	K15100	GO:0016021;GO:0055085	378	A	Y	A	Y	3	S
gi|219129526|ref|XP_002184938.1|	predicted protein [Phaeodactylum tricornutum CCAP 1055/1]	SLC25A1, CTP	K15100	GO:0016021;GO:0055085	381	G	G	G	G	3	S
gi|219129526|ref|XP_002184938.1|	predicted protein [Phaeodactylum tricornutum CCAP 1055/1]	SLC25A1, CTP	K15100	GO:0016021;GO:0055085	423	G	S	G	S	3	S
gi|219129526|ref|XP_002184938.1|	predicted protein [Phaeodactylum tricornutum CCAP 1055/1]	SLC25A1, CTP	K15100	GO:0016021;GO:0055085	441	A	Y	A	Y	3	S
gi|219129526|ref|XP_002184938.1|	predicted protein [Phaeodactylum tricornutum CCAP 1055/1]	SLC25A1, CTP	K15100	GO:0016021;GO:0055085	474	C	T	C	T	3	S
gi|219129526|ref|XP_002184938.1|	predicted protein [Phaeodactylum tricornutum CCAP 1055/1]	SLC25A1, CTP	K15100	GO:0016021;GO:0055085	498	G	G	G	G	3	S
gi|219129526|ref|XP_002184938.1|	predicted protein [Phaeodactylum tricornutum CCAP 1055/1]	SLC25A1, CTP	K15100	GO:0016021;GO:0055085	513	T	V	T	V	3	S
gi|219129526|ref|XP_002184938.1|	predicted protein [Phaeodactylum tricornutum CCAP 1055/1]	SLC25A1, CTP	K15100	GO:0016021;GO:0055085	516	T	V	T	V	3	S
gi|219129526|ref|XP_002184938.1|	predicted protein [Phaeodactylum tricornutum CCAP 1055/1]	SLC25A1, CTP	K15100	GO:0016021;GO:0055085	519	C	P	C	P	3	S
gi|219129526|ref|XP_002184938.1|	predicted protein [Phaeodactylum tricornutum CCAP 1055/1]	SLC25A1, CTP	K15100	GO:0016021;GO:0055085	555	A	H	A	H	3	S
gi|219129526|ref|XP_002184938.1|	predicted protein [Phaeodactylum tricornutum CCAP 1055/1]	SLC25A1, CTP	K15100	GO:0016021;GO:0055085	576	G	C	G	C	3	S
gi|219129526|ref|XP_002184938.1|	predicted protein [Phaeodactylum tricornutum CCAP 1055/1]	SLC25A1, CTP	K15100	GO:0016021;GO:0055085	579	A	N	A	N	3	S
gi|219129526|ref|XP_002184938.1|	predicted protein [Phaeodactylum tricornutum CCAP 1055/1]	SLC25A1, CTP	K15100	GO:0016021;GO:0055085	630	C	T	C	T	3	S
gi|219129526|ref|XP_002184938.1|	predicted protein [Phaeodactylum tricornutum CCAP 1055/1]	SLC25A1, CTP	K15100	GO:0016021;GO:0055085	672	G	R	G	R	3	S
gi|219129526|ref|XP_002184938.1|	predicted protein [Phaeodactylum tricornutum CCAP 1055/1]	SLC25A1, CTP	K15100	GO:0016021;GO:0055085	684	A	N	A	N	3	S
gi|219129526|ref|XP_002184938.1|	predicted protein [Phaeodactylum tricornutum CCAP 1055/1]	SLC25A1, CTP	K15100	GO:0016021;GO:0055085	705	A	K	A	K	3	S
gi|219129526|ref|XP_002184938.1|	predicted protein [Phaeodactylum tricornutum CCAP 1055/1]	SLC25A1, CTP	K15100	GO:0016021;GO:0055085	756	G	G	G	G	3	S
gi|219129526|ref|XP_002184938.1|	predicted protein [Phaeodactylum tricornutum CCAP 1055/1]	SLC25A1, CTP	K15100	GO:0016021;GO:0055085	762	T	F	T	F	3	S
gi|219129526|ref|XP_002184938.1|	predicted protein [Phaeodactylum tricornutum CCAP 1055/1]	SLC25A1, CTP	K15100	GO:0016021;GO:0055085	771	T	V	T	V	3	S
gi|219129526|ref|XP_002184938.1|	predicted protein [Phaeodactylum tricornutum CCAP 1055/1]	SLC25A1, CTP	K15100	GO:0016021;GO:0055085	780	C	P	C	P	3	S
gi|219129526|ref|XP_002184938.1|	predicted protein [Phaeodactylum tricornutum CCAP 1055/1]	SLC25A1, CTP	K15100	GO:0016021;GO:0055085	789	T	V	T	V	3	S
gi|219129526|ref|XP_002184938.1|	predicted protein [Phaeodactylum tricornutum CCAP 1055/1]	SLC25A1, CTP	K15100	GO:0016021;GO:0055085	795	A	K	A	K	3	S
gi|219129526|ref|XP_002184938.1|	predicted protein [Phaeodactylum tricornutum CCAP 1055/1]	SLC25A1, CTP	K15100	GO:0016021;GO:0055085	819	C	S	C	S	3	S
gi|219129526|ref|XP_002184938.1|	predicted protein [Phaeodactylum tricornutum CCAP 1055/1]	SLC25A1, CTP	K15100	GO:0016021;GO:0055085	846	T	V	T	V	3	S
gi|219129526|ref|XP_002184938.1|	predicted protein [Phaeodactylum tricornutum CCAP 1055/1]	SLC25A1, CTP	K15100	GO:0016021;GO:0055085	888	C	A	C	A	3	S
gi|219129526|ref|XP_002184938.1|	predicted protein [Phaeodactylum tricornutum CCAP 1055/1]	SLC25A1, CTP	K15100	GO:0016021;GO:0055085	903	G	R	G	R	3	S
gi|219129526|ref|XP_002184938.1|	predicted protein [Phaeodactylum tricornutum CCAP 1055/1]	SLC25A1, CTP	K15100	GO:0016021;GO:0055085	945	G	G	G	G	3	S
gi|224009954|ref|XP_002293935.1|	predicted protein [Thalassiosira pseudonana CCMP1335]	SLC11A, NRAMP	K12347	GO:0016020;GO:0050896;GO:0005215;GO:0006810	60	C	P	C	P	3	S
gi|224009954|ref|XP_002293935.1|	predicted protein [Thalassiosira pseudonana CCMP1335]	SLC11A, NRAMP	K12347	GO:0016020;GO:0050896;GO:0005215;GO:0006810	96	A	N	A	N	3	S
gi|224009954|ref|XP_002293935.1|	predicted protein [Thalassiosira pseudonana CCMP1335]	SLC11A, NRAMP	K12347	GO:0016020;GO:0050896;GO:0005215;GO:0006810	129	C	S	C	S	3	S
gi|224009954|ref|XP_002293935.1|	predicted protein [Thalassiosira pseudonana CCMP1335]	SLC11A, NRAMP	K12347	GO:0016020;GO:0050896;GO:0005215;GO:0006810	162	G	G	G	G	3	S
gi|224009954|ref|XP_002293935.1|	predicted protein [Thalassiosira pseudonana CCMP1335]	SLC11A, NRAMP	K12347	GO:0016020;GO:0050896;GO:0005215;GO:0006810	168	T	L	T	L	3	S
gi|224009954|ref|XP_002293935.1|	predicted protein [Thalassiosira pseudonana CCMP1335]	SLC11A, NRAMP	K12347	GO:0016020;GO:0050896;GO:0005215;GO:0006810	171	T	V	T	V	3	S
gi|224009954|ref|XP_002293935.1|	predicted protein [Thalassiosira pseudonana CCMP1335]	SLC11A, NRAMP	K12347	GO:0016020;GO:0050896;GO:0005215;GO:0006810	174	C	S	C	S	3	S
gi|224009954|ref|XP_002293935.1|	predicted protein [Thalassiosira pseudonana CCMP1335]	SLC11A, NRAMP	K12347	GO:0016020;GO:0050896;GO:0005215;GO:0006810	189	G	G	G	G	3	S
gi|224009954|ref|XP_002293935.1|	predicted protein [Thalassiosira pseudonana CCMP1335]	SLC11A, NRAMP	K12347	GO:0016020;GO:0050896;GO:0005215;GO:0006810	195	C	A	C	A	3	S
gi|224009954|ref|XP_002293935.1|	predicted protein [Thalassiosira pseudonana CCMP1335]	SLC11A, NRAMP	K12347	GO:0016020;GO:0050896;GO:0005215;GO:0006810	240	T	V	T	V	3	S
gi|224009954|ref|XP_002293935.1|	predicted protein [Thalassiosira pseudonana CCMP1335]	SLC11A, NRAMP	K12347	GO:0016020;GO:0050896;GO:0005215;GO:0006810	264	A	N	A	N	3	S
gi|224009954|ref|XP_002293935.1|	predicted protein [Thalassiosira pseudonana CCMP1335]	SLC11A, NRAMP	K12347	GO:0016020;GO:0050896;GO:0005215;GO:0006810	270	G	C	G	C	3	S
gi|224009954|ref|XP_002293935.1|	predicted protein [Thalassiosira pseudonana CCMP1335]	SLC11A, NRAMP	K12347	GO:0016020;GO:0050896;GO:0005215;GO:0006810	309	G	G	G	G	3	S
gi|224009954|ref|XP_002293935.1|	predicted protein [Thalassiosira pseudonana CCMP1335]	SLC11A, NRAMP	K12347	GO:0016020;GO:0050896;GO:0005215;GO:0006810	390	T	I	T	I	3	S
gi|224009954|ref|XP_002293935.1|	predicted protein [Thalassiosira pseudonana CCMP1335]	SLC11A, NRAMP	K12347	GO:0016020;GO:0050896;GO:0005215;GO:0006810	444	G	G	G	G	3	S
gi|224009954|ref|XP_002293935.1|	predicted protein [Thalassiosira pseudonana CCMP1335]	SLC11A, NRAMP	K12347	GO:0016020;GO:0050896;GO:0005215;GO:0006810	540	C	T	C	T	3	S
gi|224009954|ref|XP_002293935.1|	predicted protein [Thalassiosira pseudonana CCMP1335]	SLC11A, NRAMP	K12347	GO:0016020;GO:0050896;GO:0005215;GO:0006810	558	A	K	A	K	3	S
gi|224009954|ref|XP_002293935.1|	predicted protein [Thalassiosira pseudonana CCMP1335]	SLC11A, NRAMP	K12347	GO:0016020;GO:0050896;GO:0005215;GO:0006810	615	T	F	T	F	3	S
gi|224009954|ref|XP_002293935.1|	predicted protein [Thalassiosira pseudonana CCMP1335]	SLC11A, NRAMP	K12347	GO:0016020;GO:0050896;GO:0005215;GO:0006810	699	T	F	T	F	3	S
gi|224009954|ref|XP_002293935.1|	predicted protein [Thalassiosira pseudonana CCMP1335]	SLC11A, NRAMP	K12347	GO:0016020;GO:0050896;GO:0005215;GO:0006810	708	T	F	T	F	3	S
gi|224009954|ref|XP_002293935.1|	predicted protein [Thalassiosira pseudonana CCMP1335]	SLC11A, NRAMP	K12347	GO:0016020;GO:0050896;GO:0005215;GO:0006810	720	G	R	G	R	3	S
gi|224009954|ref|XP_002293935.1|	predicted protein [Thalassiosira pseudonana CCMP1335]	SLC11A, NRAMP	K12347	GO:0016020;GO:0050896;GO:0005215;GO:0006810	795	T	I	T	I	3	S
gi|224009954|ref|XP_002293935.1|	predicted protein [Thalassiosira pseudonana CCMP1335]	SLC11A, NRAMP	K12347	GO:0016020;GO:0050896;GO:0005215;GO:0006810	981	G	R	G	R	3	S
gi|224009954|ref|XP_002293935.1|	predicted protein [Thalassiosira pseudonana CCMP1335]	SLC11A, NRAMP	K12347	GO:0016020;GO:0050896;GO:0005215;GO:0006810	1149	C	S	C	S	3	S
gi|224009954|ref|XP_002293935.1|	predicted protein [Thalassiosira pseudonana CCMP1335]	SLC11A, NRAMP	K12347	GO:0016020;GO:0050896;GO:0005215;GO:0006810	1311	T	I	T	I	3	S
gi|224009954|ref|XP_002293935.1|	predicted protein [Thalassiosira pseudonana CCMP1335]	SLC11A, NRAMP	K12347	GO:0016020;GO:0050896;GO:0005215;GO:0006810	1335	C	T	C	T	3	S
gi|219124722|ref|XP_002182646.1|	predicted protein [Phaeodactylum tricornutum CCAP 1055/1]	SLC10A7, P7	K14347	_	300	C	A	C	A	3	S
gi|219124722|ref|XP_002182646.1|	predicted protein [Phaeodactylum tricornutum CCAP 1055/1]	SLC10A7, P7	K14347	_	309	C	P	C	P	3	S
gi|219124722|ref|XP_002182646.1|	predicted protein [Phaeodactylum tricornutum CCAP 1055/1]	SLC10A7, P7	K14347	_	318	C	A	C	A	3	S
gi|219124722|ref|XP_002182646.1|	predicted protein [Phaeodactylum tricornutum CCAP 1055/1]	SLC10A7, P7	K14347	_	321	A	Q	A	Q	3	S
gi|219124722|ref|XP_002182646.1|	predicted protein [Phaeodactylum tricornutum CCAP 1055/1]	SLC10A7, P7	K14347	_	453	T	V	T	V	3	S
gi|219124722|ref|XP_002182646.1|	predicted protein [Phaeodactylum tricornutum CCAP 1055/1]	SLC10A7, P7	K14347	_	531	G	G	G	G	3	S
gi|219124722|ref|XP_002182646.1|	predicted protein [Phaeodactylum tricornutum CCAP 1055/1]	SLC10A7, P7	K14347	_	627	C	A	C	A	3	S
gi|219124722|ref|XP_002182646.1|	predicted protein [Phaeodactylum tricornutum CCAP 1055/1]	SLC10A7, P7	K14347	_	795	C	P	C	P	3	S
gi|219124722|ref|XP_002182646.1|	predicted protein [Phaeodactylum tricornutum CCAP 1055/1]	SLC10A7, P7	K14347	_	798	C	T	C	T	3	S
gi|219124722|ref|XP_002182646.1|	predicted protein [Phaeodactylum tricornutum CCAP 1055/1]	SLC10A7, P7	K14347	_	801	T	V	T	V	3	S
gi|219124722|ref|XP_002182646.1|	predicted protein [Phaeodactylum tricornutum CCAP 1055/1]	SLC10A7, P7	K14347	_	1008	C	P	C	P	3	S
gi|219109658|ref|XP_002176583.1|	predicted protein [Phaeodactylum tricornutum CCAP 1055/1]	SKP1, CBF3D	K03094	GO:0016310;GO:0016874;GO:0016301;GO:0006511	126	C	S	C	S	3	S
gi|219109658|ref|XP_002176583.1|	predicted protein [Phaeodactylum tricornutum CCAP 1055/1]	SKP1, CBF3D	K03094	GO:0016310;GO:0016874;GO:0016301;GO:0006511	285	T	L	T	L	3	S
gi|219109658|ref|XP_002176583.1|	predicted protein [Phaeodactylum tricornutum CCAP 1055/1]	SKP1, CBF3D	K03094	GO:0016310;GO:0016874;GO:0016301;GO:0006511	375	C	S	C	S	3	S
gi|219109658|ref|XP_002176583.1|	predicted protein [Phaeodactylum tricornutum CCAP 1055/1]	SKP1, CBF3D	K03094	GO:0016310;GO:0016874;GO:0016301;GO:0006511	540	A	K	A	K	3	S
gi|219109658|ref|XP_002176583.1|	predicted protein [Phaeodactylum tricornutum CCAP 1055/1]	SKP1, CBF3D	K03094	GO:0016310;GO:0016874;GO:0016301;GO:0006511	1029	C	S	C	S	3	S
gi|219109658|ref|XP_002176583.1|	predicted protein [Phaeodactylum tricornutum CCAP 1055/1]	SKP1, CBF3D	K03094	GO:0016310;GO:0016874;GO:0016301;GO:0006511	1068	T	V	T	V	3	S
gi|219109658|ref|XP_002176583.1|	predicted protein [Phaeodactylum tricornutum CCAP 1055/1]	SKP1, CBF3D	K03094	GO:0016310;GO:0016874;GO:0016301;GO:0006511	1386	C	S	C	S	3	S
gi|219109658|ref|XP_002176583.1|	predicted protein [Phaeodactylum tricornutum CCAP 1055/1]	SKP1, CBF3D	K03094	GO:0016310;GO:0016874;GO:0016301;GO:0006511	1635	A	D	A	D	3	S
gi|219109658|ref|XP_002176583.1|	predicted protein [Phaeodactylum tricornutum CCAP 1055/1]	SKP1, CBF3D	K03094	GO:0016310;GO:0016874;GO:0016301;GO:0006511	1740	A	K	A	K	3	S
gi|219109658|ref|XP_002176583.1|	predicted protein [Phaeodactylum tricornutum CCAP 1055/1]	SKP1, CBF3D	K03094	GO:0016310;GO:0016874;GO:0016301;GO:0006511	1746	T	L	T	L	3	S
gi|219109658|ref|XP_002176583.1|	predicted protein [Phaeodactylum tricornutum CCAP 1055/1]	SKP1, CBF3D	K03094	GO:0016310;GO:0016874;GO:0016301;GO:0006511	1767	A	K	A	K	3	S
gi|219109658|ref|XP_002176583.1|	predicted protein [Phaeodactylum tricornutum CCAP 1055/1]	SKP1, CBF3D	K03094	GO:0016310;GO:0016874;GO:0016301;GO:0006511	1797	C	T	C	T	3	S
gi|219130285|ref|XP_002185299.1|	predicted protein [Phaeodactylum tricornutum CCAP 1055/1]	SIRT2, SIR2L2	K11412	GO:0070403;GO:0016811;GO:0006476;GO:0006807;GO:0008270	87	G	G	G	G	3	S
gi|219130285|ref|XP_002185299.1|	predicted protein [Phaeodactylum tricornutum CCAP 1055/1]	SIRT2, SIR2L2	K11412	GO:0070403;GO:0016811;GO:0006476;GO:0006807;GO:0008270	111	C	P	C	P	3	S
gi|219130285|ref|XP_002185299.1|	predicted protein [Phaeodactylum tricornutum CCAP 1055/1]	SIRT2, SIR2L2	K11412	GO:0070403;GO:0016811;GO:0006476;GO:0006807;GO:0008270	120	A	E	A	E	3	S
gi|219130285|ref|XP_002185299.1|	predicted protein [Phaeodactylum tricornutum CCAP 1055/1]	SIRT2, SIR2L2	K11412	GO:0070403;GO:0016811;GO:0006476;GO:0006807;GO:0008270	234	G	G	G	G	3	S
gi|219130285|ref|XP_002185299.1|	predicted protein [Phaeodactylum tricornutum CCAP 1055/1]	SIRT2, SIR2L2	K11412	GO:0070403;GO:0016811;GO:0006476;GO:0006807;GO:0008270	249	T	V	T	V	3	S
gi|219130285|ref|XP_002185299.1|	predicted protein [Phaeodactylum tricornutum CCAP 1055/1]	SIRT2, SIR2L2	K11412	GO:0070403;GO:0016811;GO:0006476;GO:0006807;GO:0008270	255	G	G	G	G	3	S
gi|219130285|ref|XP_002185299.1|	predicted protein [Phaeodactylum tricornutum CCAP 1055/1]	SIRT2, SIR2L2	K11412	GO:0070403;GO:0016811;GO:0006476;GO:0006807;GO:0008270	258	C	A	C	A	3	S
gi|219130285|ref|XP_002185299.1|	predicted protein [Phaeodactylum tricornutum CCAP 1055/1]	SIRT2, SIR2L2	K11412	GO:0070403;GO:0016811;GO:0006476;GO:0006807;GO:0008270	267	T	V	T	V	3	S
gi|219130285|ref|XP_002185299.1|	predicted protein [Phaeodactylum tricornutum CCAP 1055/1]	SIRT2, SIR2L2	K11412	GO:0070403;GO:0016811;GO:0006476;GO:0006807;GO:0008270	270	G	G	G	G	3	S
gi|219130285|ref|XP_002185299.1|	predicted protein [Phaeodactylum tricornutum CCAP 1055/1]	SIRT2, SIR2L2	K11412	GO:0070403;GO:0016811;GO:0006476;GO:0006807;GO:0008270	276	C	P	C	P	3	S
gi|219130285|ref|XP_002185299.1|	predicted protein [Phaeodactylum tricornutum CCAP 1055/1]	SIRT2, SIR2L2	K11412	GO:0070403;GO:0016811;GO:0006476;GO:0006807;GO:0008270	279	A	D	A	D	3	S
gi|219130285|ref|XP_002185299.1|	predicted protein [Phaeodactylum tricornutum CCAP 1055/1]	SIRT2, SIR2L2	K11412	GO:0070403;GO:0016811;GO:0006476;GO:0006807;GO:0008270	282	T	F	T	F	3	S
gi|219130285|ref|XP_002185299.1|	predicted protein [Phaeodactylum tricornutum CCAP 1055/1]	SIRT2, SIR2L2	K11412	GO:0070403;GO:0016811;GO:0006476;GO:0006807;GO:0008270	288	G	G	G	G	3	S
gi|219130285|ref|XP_002185299.1|	predicted protein [Phaeodactylum tricornutum CCAP 1055/1]	SIRT2, SIR2L2	K11412	GO:0070403;GO:0016811;GO:0006476;GO:0006807;GO:0008270	306	C	T	C	T	3	S
gi|219130285|ref|XP_002185299.1|	predicted protein [Phaeodactylum tricornutum CCAP 1055/1]	SIRT2, SIR2L2	K11412	GO:0070403;GO:0016811;GO:0006476;GO:0006807;GO:0008270	330	A	E	A	E	3	S
gi|219130285|ref|XP_002185299.1|	predicted protein [Phaeodactylum tricornutum CCAP 1055/1]	SIRT2, SIR2L2	K11412	GO:0070403;GO:0016811;GO:0006476;GO:0006807;GO:0008270	339	A	D	A	D	3	S
gi|219130285|ref|XP_002185299.1|	predicted protein [Phaeodactylum tricornutum CCAP 1055/1]	SIRT2, SIR2L2	K11412	GO:0070403;GO:0016811;GO:0006476;GO:0006807;GO:0008270	348	C	P	C	P	3	S
gi|219130285|ref|XP_002185299.1|	predicted protein [Phaeodactylum tricornutum CCAP 1055/1]	SIRT2, SIR2L2	K11412	GO:0070403;GO:0016811;GO:0006476;GO:0006807;GO:0008270	354	T	F	T	F	3	S
gi|219130285|ref|XP_002185299.1|	predicted protein [Phaeodactylum tricornutum CCAP 1055/1]	SIRT2, SIR2L2	K11412	GO:0070403;GO:0016811;GO:0006476;GO:0006807;GO:0008270	363	C	A	C	A	3	S
gi|219130285|ref|XP_002185299.1|	predicted protein [Phaeodactylum tricornutum CCAP 1055/1]	SIRT2, SIR2L2	K11412	GO:0070403;GO:0016811;GO:0006476;GO:0006807;GO:0008270	390	T	V	T	V	3	S
gi|219130285|ref|XP_002185299.1|	predicted protein [Phaeodactylum tricornutum CCAP 1055/1]	SIRT2, SIR2L2	K11412	GO:0070403;GO:0016811;GO:0006476;GO:0006807;GO:0008270	594	T	I	T	I	3	S
gi|219130285|ref|XP_002185299.1|	predicted protein [Phaeodactylum tricornutum CCAP 1055/1]	SIRT2, SIR2L2	K11412	GO:0070403;GO:0016811;GO:0006476;GO:0006807;GO:0008270	639	C	P	C	P	3	S
gi|219130285|ref|XP_002185299.1|	predicted protein [Phaeodactylum tricornutum CCAP 1055/1]	SIRT2, SIR2L2	K11412	GO:0070403;GO:0016811;GO:0006476;GO:0006807;GO:0008270	756	T	L	T	L	3	S
gi|219130285|ref|XP_002185299.1|	predicted protein [Phaeodactylum tricornutum CCAP 1055/1]	SIRT2, SIR2L2	K11412	GO:0070403;GO:0016811;GO:0006476;GO:0006807;GO:0008270	795	C	T	C	T	3	S
gi|219130285|ref|XP_002185299.1|	predicted protein [Phaeodactylum tricornutum CCAP 1055/1]	SIRT2, SIR2L2	K11412	GO:0070403;GO:0016811;GO:0006476;GO:0006807;GO:0008270	942	C	P	C	P	3	S
gi|219130285|ref|XP_002185299.1|	predicted protein [Phaeodactylum tricornutum CCAP 1055/1]	SIRT2, SIR2L2	K11412	GO:0070403;GO:0016811;GO:0006476;GO:0006807;GO:0008270	948	C	T	C	T	3	S
gi|219130285|ref|XP_002185299.1|	predicted protein [Phaeodactylum tricornutum CCAP 1055/1]	SIRT2, SIR2L2	K11412	GO:0070403;GO:0016811;GO:0006476;GO:0006807;GO:0008270	981	C	T	C	T	3	S
gi|219130285|ref|XP_002185299.1|	predicted protein [Phaeodactylum tricornutum CCAP 1055/1]	SIRT2, SIR2L2	K11412	GO:0070403;GO:0016811;GO:0006476;GO:0006807;GO:0008270	984	T	L	T	L	3	S
gi|219130285|ref|XP_002185299.1|	predicted protein [Phaeodactylum tricornutum CCAP 1055/1]	SIRT2, SIR2L2	K11412	GO:0070403;GO:0016811;GO:0006476;GO:0006807;GO:0008270	990	C	S	C	S	3	S
gi|219130285|ref|XP_002185299.1|	predicted protein [Phaeodactylum tricornutum CCAP 1055/1]	SIRT2, SIR2L2	K11412	GO:0070403;GO:0016811;GO:0006476;GO:0006807;GO:0008270	1008	G	R	G	R	3	S
gi|219130285|ref|XP_002185299.1|	predicted protein [Phaeodactylum tricornutum CCAP 1055/1]	SIRT2, SIR2L2	K11412	GO:0070403;GO:0016811;GO:0006476;GO:0006807;GO:0008270	1026	C	S	C	S	3	S
gi|219130285|ref|XP_002185299.1|	predicted protein [Phaeodactylum tricornutum CCAP 1055/1]	SIRT2, SIR2L2	K11412	GO:0070403;GO:0016811;GO:0006476;GO:0006807;GO:0008270	1095	A	K	A	K	3	S
gi|219130285|ref|XP_002185299.1|	predicted protein [Phaeodactylum tricornutum CCAP 1055/1]	SIRT2, SIR2L2	K11412	GO:0070403;GO:0016811;GO:0006476;GO:0006807;GO:0008270	1107	T	I	T	I	3	S
gi|219130285|ref|XP_002185299.1|	predicted protein [Phaeodactylum tricornutum CCAP 1055/1]	SIRT2, SIR2L2	K11412	GO:0070403;GO:0016811;GO:0006476;GO:0006807;GO:0008270	1188	G	S	G	S	3	S
gi|219119031|ref|XP_002180282.1|	predicted protein [Phaeodactylum tricornutum CCAP 1055/1]	SIRT2, SIR2L2	K11412	GO:0070403;GO:0043167;GO:0051287	1554	A	*	A	*	3	S
gi|224005188|ref|XP_002296245.1|	predicted protein [Thalassiosira pseudonana CCMP1335]	SIN3A	K11644	GO:0006355;GO:0005634	21	C	P	C	P	3	S
gi|224005188|ref|XP_002296245.1|	predicted protein [Thalassiosira pseudonana CCMP1335]	SIN3A	K11644	GO:0006355;GO:0005634	153	C	A	C	A	3	S
gi|224005188|ref|XP_002296245.1|	predicted protein [Thalassiosira pseudonana CCMP1335]	SIN3A	K11644	GO:0006355;GO:0005634	822	T	V	T	V	3	S
gi|224005188|ref|XP_002296245.1|	predicted protein [Thalassiosira pseudonana CCMP1335]	SIN3A	K11644	GO:0006355;GO:0005634	1314	A	Q	A	Q	3	S
gi|224005188|ref|XP_002296245.1|	predicted protein [Thalassiosira pseudonana CCMP1335]	SIN3A	K11644	GO:0006355;GO:0005634	2877	C	A	C	A	3	S
gi|397639842|gb|EJK73795.1|	hypothetical protein THAOC_04562, partial [Thalassiosira oceanica]	SIN3A	K11644	GO:0006355;GO:0005634	42	A	D	A	D	3	S
gi|397639842|gb|EJK73795.1|	hypothetical protein THAOC_04562, partial [Thalassiosira oceanica]	SIN3A	K11644	GO:0006355;GO:0005634	636	C	A	C	A	3	S
gi|397639842|gb|EJK73795.1|	hypothetical protein THAOC_04562, partial [Thalassiosira oceanica]	SIN3A	K11644	GO:0006355;GO:0005634	648	G	R	G	R	3	S
gi|397639842|gb|EJK73795.1|	hypothetical protein THAOC_04562, partial [Thalassiosira oceanica]	SIN3A	K11644	GO:0006355;GO:0005634	720	G	G	G	G	3	S
gi|397639842|gb|EJK73795.1|	hypothetical protein THAOC_04562, partial [Thalassiosira oceanica]	SIN3A	K11644	GO:0006355;GO:0005634	726	C	P	C	P	3	S
gi|397639842|gb|EJK73795.1|	hypothetical protein THAOC_04562, partial [Thalassiosira oceanica]	SIN3A	K11644	GO:0006355;GO:0005634	741	T	V	T	V	3	S
gi|397639842|gb|EJK73795.1|	hypothetical protein THAOC_04562, partial [Thalassiosira oceanica]	SIN3A	K11644	GO:0006355;GO:0005634	1926	G	G	G	G	3	S
gi|219111033|ref|XP_002177268.1|	predicted protein [Phaeodactylum tricornutum CCAP 1055/1]	SIG1, rpoD	K03086	GO:0006352;GO:0003700;GO:0045449;GO:0003677;GO:0006355;GO:0005667;GO:0016987	1545	A	K	A	K	3	S
gi|512886481|ref|XP_004921764.1|	PREDICTED: RNA polymerase-associated protein CTR9 homolog [Bombyx mori]	SFRS17	K13169	_	747	C	A	C	A	3	S
gi|512886481|ref|XP_004921764.1|	PREDICTED: RNA polymerase-associated protein CTR9 homolog [Bombyx mori]	SFRS17	K13169	_	888	C	A	C	A	3	S
gi|219130389|ref|XP_002185349.1|	predicted protein [Phaeodactylum tricornutum CCAP 1055/1]	SF3B4, SAP49	K12831	GO:0000166;GO:0003676	69	G	R	G	R	3	S
gi|219130389|ref|XP_002185349.1|	predicted protein [Phaeodactylum tricornutum CCAP 1055/1]	SF3B4, SAP49	K12831	GO:0000166;GO:0003676	78	C	A	C	A	3	S
gi|219130389|ref|XP_002185349.1|	predicted protein [Phaeodactylum tricornutum CCAP 1055/1]	SF3B4, SAP49	K12831	GO:0000166;GO:0003676	81	C	T	C	T	3	S
gi|219130389|ref|XP_002185349.1|	predicted protein [Phaeodactylum tricornutum CCAP 1055/1]	SF3B4, SAP49	K12831	GO:0000166;GO:0003676	84	T	V	T	V	3	S
gi|219130389|ref|XP_002185349.1|	predicted protein [Phaeodactylum tricornutum CCAP 1055/1]	SF3B4, SAP49	K12831	GO:0000166;GO:0003676	90	A	N	A	N	3	S
gi|219130389|ref|XP_002185349.1|	predicted protein [Phaeodactylum tricornutum CCAP 1055/1]	SF3B4, SAP49	K12831	GO:0000166;GO:0003676	96	A	D	A	D	3	S
gi|219130389|ref|XP_002185349.1|	predicted protein [Phaeodactylum tricornutum CCAP 1055/1]	SF3B4, SAP49	K12831	GO:0000166;GO:0003676	114	A	E	A	E	3	S
gi|219130389|ref|XP_002185349.1|	predicted protein [Phaeodactylum tricornutum CCAP 1055/1]	SF3B4, SAP49	K12831	GO:0000166;GO:0003676	117	T	F	T	F	3	S
gi|219130389|ref|XP_002185349.1|	predicted protein [Phaeodactylum tricornutum CCAP 1055/1]	SF3B4, SAP49	K12831	GO:0000166;GO:0003676	147	C	P	C	P	3	S
gi|219130389|ref|XP_002185349.1|	predicted protein [Phaeodactylum tricornutum CCAP 1055/1]	SF3B4, SAP49	K12831	GO:0000166;GO:0003676	150	A	D	A	D	3	S
gi|219130389|ref|XP_002185349.1|	predicted protein [Phaeodactylum tricornutum CCAP 1055/1]	SF3B4, SAP49	K12831	GO:0000166;GO:0003676	159	A	H	A	H	3	S
gi|219130389|ref|XP_002185349.1|	predicted protein [Phaeodactylum tricornutum CCAP 1055/1]	SF3B4, SAP49	K12831	GO:0000166;GO:0003676	165	G	G	G	G	3	S
gi|219130389|ref|XP_002185349.1|	predicted protein [Phaeodactylum tricornutum CCAP 1055/1]	SF3B4, SAP49	K12831	GO:0000166;GO:0003676	168	A	Y	A	Y	3	S
gi|219130389|ref|XP_002185349.1|	predicted protein [Phaeodactylum tricornutum CCAP 1055/1]	SF3B4, SAP49	K12831	GO:0000166;GO:0003676	171	G	G	G	G	3	S
gi|219130389|ref|XP_002185349.1|	predicted protein [Phaeodactylum tricornutum CCAP 1055/1]	SF3B4, SAP49	K12831	GO:0000166;GO:0003676	177	T	V	T	V	3	S
gi|219130389|ref|XP_002185349.1|	predicted protein [Phaeodactylum tricornutum CCAP 1055/1]	SF3B4, SAP49	K12831	GO:0000166;GO:0003676	180	T	F	T	F	3	S
gi|219130389|ref|XP_002185349.1|	predicted protein [Phaeodactylum tricornutum CCAP 1055/1]	SF3B4, SAP49	K12831	GO:0000166;GO:0003676	189	C	A	C	A	3	S
gi|219130389|ref|XP_002185349.1|	predicted protein [Phaeodactylum tricornutum CCAP 1055/1]	SF3B4, SAP49	K12831	GO:0000166;GO:0003676	195	A	Y	A	Y	3	S
gi|219130389|ref|XP_002185349.1|	predicted protein [Phaeodactylum tricornutum CCAP 1055/1]	SF3B4, SAP49	K12831	GO:0000166;GO:0003676	198	C	A	C	A	3	S
gi|219130389|ref|XP_002185349.1|	predicted protein [Phaeodactylum tricornutum CCAP 1055/1]	SF3B4, SAP49	K12831	GO:0000166;GO:0003676	204	T	I	T	I	3	S
gi|219130389|ref|XP_002185349.1|	predicted protein [Phaeodactylum tricornutum CCAP 1055/1]	SF3B4, SAP49	K12831	GO:0000166;GO:0003676	216	A	K	A	K	3	S
gi|219130389|ref|XP_002185349.1|	predicted protein [Phaeodactylum tricornutum CCAP 1055/1]	SF3B4, SAP49	K12831	GO:0000166;GO:0003676	225	G	G	G	G	3	S
gi|219130389|ref|XP_002185349.1|	predicted protein [Phaeodactylum tricornutum CCAP 1055/1]	SF3B4, SAP49	K12831	GO:0000166;GO:0003676	540	C	A	C	A	3	S
gi|219130389|ref|XP_002185349.1|	predicted protein [Phaeodactylum tricornutum CCAP 1055/1]	SF3B4, SAP49	K12831	GO:0000166;GO:0003676	600	C	P	C	P	3	S
gi|219129893|ref|XP_002185112.1|	predicted protein [Phaeodactylum tricornutum CCAP 1055/1]	SF3B1, SAP155	K12828	GO:0005829;GO:0009507;GO:0006397;GO:0005634	54	G	G	G	G	3	S
gi|219129893|ref|XP_002185112.1|	predicted protein [Phaeodactylum tricornutum CCAP 1055/1]	SF3B1, SAP155	K12828	GO:0005829;GO:0009507;GO:0006397;GO:0005634	66	G	G	G	G	3	S
gi|219129893|ref|XP_002185112.1|	predicted protein [Phaeodactylum tricornutum CCAP 1055/1]	SF3B1, SAP155	K12828	GO:0005829;GO:0009507;GO:0006397;GO:0005634	90	G	G	G	G	3	S
gi|219129893|ref|XP_002185112.1|	predicted protein [Phaeodactylum tricornutum CCAP 1055/1]	SF3B1, SAP155	K12828	GO:0005829;GO:0009507;GO:0006397;GO:0005634	159	C	A	C	A	3	S
gi|219129893|ref|XP_002185112.1|	predicted protein [Phaeodactylum tricornutum CCAP 1055/1]	SF3B1, SAP155	K12828	GO:0005829;GO:0009507;GO:0006397;GO:0005634	174	A	E	A	E	3	S
gi|219129893|ref|XP_002185112.1|	predicted protein [Phaeodactylum tricornutum CCAP 1055/1]	SF3B1, SAP155	K12828	GO:0005829;GO:0009507;GO:0006397;GO:0005634	204	C	P	C	P	3	S
gi|219129893|ref|XP_002185112.1|	predicted protein [Phaeodactylum tricornutum CCAP 1055/1]	SF3B1, SAP155	K12828	GO:0005829;GO:0009507;GO:0006397;GO:0005634	333	G	R	G	R	3	S
gi|219129893|ref|XP_002185112.1|	predicted protein [Phaeodactylum tricornutum CCAP 1055/1]	SF3B1, SAP155	K12828	GO:0005829;GO:0009507;GO:0006397;GO:0005634	384	C	A	C	A	3	S
gi|219129893|ref|XP_002185112.1|	predicted protein [Phaeodactylum tricornutum CCAP 1055/1]	SF3B1, SAP155	K12828	GO:0005829;GO:0009507;GO:0006397;GO:0005634	429	C	A	C	A	3	S
gi|219129893|ref|XP_002185112.1|	predicted protein [Phaeodactylum tricornutum CCAP 1055/1]	SF3B1, SAP155	K12828	GO:0005829;GO:0009507;GO:0006397;GO:0005634	456	G	S	G	S	3	S
gi|219129893|ref|XP_002185112.1|	predicted protein [Phaeodactylum tricornutum CCAP 1055/1]	SF3B1, SAP155	K12828	GO:0005829;GO:0009507;GO:0006397;GO:0005634	465	A	Q	A	Q	3	S
gi|219129893|ref|XP_002185112.1|	predicted protein [Phaeodactylum tricornutum CCAP 1055/1]	SF3B1, SAP155	K12828	GO:0005829;GO:0009507;GO:0006397;GO:0005634	537	A	Q	A	Q	3	S
gi|219129893|ref|XP_002185112.1|	predicted protein [Phaeodactylum tricornutum CCAP 1055/1]	SF3B1, SAP155	K12828	GO:0005829;GO:0009507;GO:0006397;GO:0005634	651	A	Q	A	Q	3	S
gi|219129893|ref|XP_002185112.1|	predicted protein [Phaeodactylum tricornutum CCAP 1055/1]	SF3B1, SAP155	K12828	GO:0005829;GO:0009507;GO:0006397;GO:0005634	654	C	P	C	P	3	S
gi|219129893|ref|XP_002185112.1|	predicted protein [Phaeodactylum tricornutum CCAP 1055/1]	SF3B1, SAP155	K12828	GO:0005829;GO:0009507;GO:0006397;GO:0005634	705	G	R	G	R	3	S
gi|219129893|ref|XP_002185112.1|	predicted protein [Phaeodactylum tricornutum CCAP 1055/1]	SF3B1, SAP155	K12828	GO:0005829;GO:0009507;GO:0006397;GO:0005634	744	A	Q	A	Q	3	S
gi|219129893|ref|XP_002185112.1|	predicted protein [Phaeodactylum tricornutum CCAP 1055/1]	SF3B1, SAP155	K12828	GO:0005829;GO:0009507;GO:0006397;GO:0005634	816	C	P	C	P	3	S
gi|219129893|ref|XP_002185112.1|	predicted protein [Phaeodactylum tricornutum CCAP 1055/1]	SF3B1, SAP155	K12828	GO:0005829;GO:0009507;GO:0006397;GO:0005634	879	C	P	C	P	3	S
gi|219129893|ref|XP_002185112.1|	predicted protein [Phaeodactylum tricornutum CCAP 1055/1]	SF3B1, SAP155	K12828	GO:0005829;GO:0009507;GO:0006397;GO:0005634	882	G	G	G	G	3	S
gi|219129893|ref|XP_002185112.1|	predicted protein [Phaeodactylum tricornutum CCAP 1055/1]	SF3B1, SAP155	K12828	GO:0005829;GO:0009507;GO:0006397;GO:0005634	975	G	R	G	R	3	S
gi|219129893|ref|XP_002185112.1|	predicted protein [Phaeodactylum tricornutum CCAP 1055/1]	SF3B1, SAP155	K12828	GO:0005829;GO:0009507;GO:0006397;GO:0005634	1005	G	R	G	R	3	S
gi|219129893|ref|XP_002185112.1|	predicted protein [Phaeodactylum tricornutum CCAP 1055/1]	SF3B1, SAP155	K12828	GO:0005829;GO:0009507;GO:0006397;GO:0005634	1395	T	V	T	V	3	S
gi|219129893|ref|XP_002185112.1|	predicted protein [Phaeodactylum tricornutum CCAP 1055/1]	SF3B1, SAP155	K12828	GO:0005829;GO:0009507;GO:0006397;GO:0005634	1551	A	Q	A	Q	3	S
gi|219129893|ref|XP_002185112.1|	predicted protein [Phaeodactylum tricornutum CCAP 1055/1]	SF3B1, SAP155	K12828	GO:0005829;GO:0009507;GO:0006397;GO:0005634	1737	A	Q	A	Q	3	S
gi|219129893|ref|XP_002185112.1|	predicted protein [Phaeodactylum tricornutum CCAP 1055/1]	SF3B1, SAP155	K12828	GO:0005829;GO:0009507;GO:0006397;GO:0005634	1848	G	G	G	G	3	S
gi|219129893|ref|XP_002185112.1|	predicted protein [Phaeodactylum tricornutum CCAP 1055/1]	SF3B1, SAP155	K12828	GO:0005829;GO:0009507;GO:0006397;GO:0005634	2214	T	V	T	V	3	S
gi|219129893|ref|XP_002185112.1|	predicted protein [Phaeodactylum tricornutum CCAP 1055/1]	SF3B1, SAP155	K12828	GO:0005829;GO:0009507;GO:0006397;GO:0005634	2226	G	G	G	G	3	S
gi|219129893|ref|XP_002185112.1|	predicted protein [Phaeodactylum tricornutum CCAP 1055/1]	SF3B1, SAP155	K12828	GO:0005829;GO:0009507;GO:0006397;GO:0005634	2406	G	G	G	G	3	S
gi|219129893|ref|XP_002185112.1|	predicted protein [Phaeodactylum tricornutum CCAP 1055/1]	SF3B1, SAP155	K12828	GO:0005829;GO:0009507;GO:0006397;GO:0005634	2667	C	P	C	P	3	S
gi|219129893|ref|XP_002185112.1|	predicted protein [Phaeodactylum tricornutum CCAP 1055/1]	SF3B1, SAP155	K12828	GO:0005829;GO:0009507;GO:0006397;GO:0005634	3015	A	H	A	H	3	S
gi|219129893|ref|XP_002185112.1|	predicted protein [Phaeodactylum tricornutum CCAP 1055/1]	SF3B1, SAP155	K12828	GO:0005829;GO:0009507;GO:0006397;GO:0005634	3030	T	L	T	L	3	S
gi|219129893|ref|XP_002185112.1|	predicted protein [Phaeodactylum tricornutum CCAP 1055/1]	SF3B1, SAP155	K12828	GO:0005829;GO:0009507;GO:0006397;GO:0005634	3054	G	G	G	G	3	S
gi|219129893|ref|XP_002185112.1|	predicted protein [Phaeodactylum tricornutum CCAP 1055/1]	SF3B1, SAP155	K12828	GO:0005829;GO:0009507;GO:0006397;GO:0005634	3201	A	H	A	H	3	S
gi|219116626|ref|XP_002179108.1|	predicted protein [Phaeodactylum tricornutum CCAP 1055/1]	SF3A3, SAP61, PRP9	K12827	GO:0005622;GO:0005488	597	T	L	T	L	3	S
gi|219116626|ref|XP_002179108.1|	predicted protein [Phaeodactylum tricornutum CCAP 1055/1]	SF3A3, SAP61, PRP9	K12827	GO:0005622;GO:0005488	666	A	Q	A	Q	3	S
gi|219116626|ref|XP_002179108.1|	predicted protein [Phaeodactylum tricornutum CCAP 1055/1]	SF3A3, SAP61, PRP9	K12827	GO:0005622;GO:0005488	693	C	T	C	T	3	S
gi|219116626|ref|XP_002179108.1|	predicted protein [Phaeodactylum tricornutum CCAP 1055/1]	SF3A3, SAP61, PRP9	K12827	GO:0005622;GO:0005488	708	C	S	C	S	3	S
gi|219116626|ref|XP_002179108.1|	predicted protein [Phaeodactylum tricornutum CCAP 1055/1]	SF3A3, SAP61, PRP9	K12827	GO:0005622;GO:0005488	756	C	S	C	S	3	S
gi|219116626|ref|XP_002179108.1|	predicted protein [Phaeodactylum tricornutum CCAP 1055/1]	SF3A3, SAP61, PRP9	K12827	GO:0005622;GO:0005488	831	C	T	C	T	3	S
gi|219116626|ref|XP_002179108.1|	predicted protein [Phaeodactylum tricornutum CCAP 1055/1]	SF3A3, SAP61, PRP9	K12827	GO:0005622;GO:0005488	906	T	F	T	F	3	S
gi|219116626|ref|XP_002179108.1|	predicted protein [Phaeodactylum tricornutum CCAP 1055/1]	SF3A3, SAP61, PRP9	K12827	GO:0005622;GO:0005488	1020	C	T	C	T	3	S
gi|219116626|ref|XP_002179108.1|	predicted protein [Phaeodactylum tricornutum CCAP 1055/1]	SF3A3, SAP61, PRP9	K12827	GO:0005622;GO:0005488	1092	A	N	A	N	3	S
gi|219116626|ref|XP_002179108.1|	predicted protein [Phaeodactylum tricornutum CCAP 1055/1]	SF3A3, SAP61, PRP9	K12827	GO:0005622;GO:0005488	1131	A	K	A	K	3	S
gi|219116626|ref|XP_002179108.1|	predicted protein [Phaeodactylum tricornutum CCAP 1055/1]	SF3A3, SAP61, PRP9	K12827	GO:0005622;GO:0005488	1155	G	R	G	R	3	S
gi|219116626|ref|XP_002179108.1|	predicted protein [Phaeodactylum tricornutum CCAP 1055/1]	SF3A3, SAP61, PRP9	K12827	GO:0005622;GO:0005488	1359	A	*	A	*	3	S
gi|219116626|ref|XP_002179108.1|	predicted protein [Phaeodactylum tricornutum CCAP 1055/1]	SF3A3, SAP61, PRP9	K12827	GO:0005622;GO:0005488	1416	A	Q	A	Q	3	S
gi|219116626|ref|XP_002179108.1|	predicted protein [Phaeodactylum tricornutum CCAP 1055/1]	SF3A3, SAP61, PRP9	K12827	GO:0005622;GO:0005488	1422	A	K	A	K	3	S
gi|219116626|ref|XP_002179108.1|	predicted protein [Phaeodactylum tricornutum CCAP 1055/1]	SF3A3, SAP61, PRP9	K12827	GO:0005622;GO:0005488	1428	C	T	C	T	3	S
gi|223994665|ref|XP_002287016.1|	predicted protein [Thalassiosira pseudonana CCMP1335]	SF3A1, SAP114	K12825	GO:0006396	363	C	T	C	T	3	S
gi|223994665|ref|XP_002287016.1|	predicted protein [Thalassiosira pseudonana CCMP1335]	SF3A1, SAP114	K12825	GO:0006396	1326	G	R	G	R	3	S
gi|223994665|ref|XP_002287016.1|	predicted protein [Thalassiosira pseudonana CCMP1335]	SF3A1, SAP114	K12825	GO:0006396	1506	A	K	A	K	3	S
gi|223994665|ref|XP_002287016.1|	predicted protein [Thalassiosira pseudonana CCMP1335]	SF3A1, SAP114	K12825	GO:0006396	1650	A	D	A	D	3	S
gi|223994665|ref|XP_002287016.1|	predicted protein [Thalassiosira pseudonana CCMP1335]	SF3A1, SAP114	K12825	GO:0006396	1668	T	I	T	I	3	S
gi|223994665|ref|XP_002287016.1|	predicted protein [Thalassiosira pseudonana CCMP1335]	SF3A1, SAP114	K12825	GO:0006396	1695	C	P	C	P	3	S
gi|223994665|ref|XP_002287016.1|	predicted protein [Thalassiosira pseudonana CCMP1335]	SF3A1, SAP114	K12825	GO:0006396	1770	C	S	C	S	3	S
gi|223994665|ref|XP_002287016.1|	predicted protein [Thalassiosira pseudonana CCMP1335]	SF3A1, SAP114	K12825	GO:0006396	1773	C	T	C	T	3	S
gi|223994665|ref|XP_002287016.1|	predicted protein [Thalassiosira pseudonana CCMP1335]	SF3A1, SAP114	K12825	GO:0006396	1890	C	S	C	S	3	S
gi|223994665|ref|XP_002287016.1|	predicted protein [Thalassiosira pseudonana CCMP1335]	SF3A1, SAP114	K12825	GO:0006396	1923	G	R	G	R	3	S
gi|224000916|ref|XP_002290130.1|	predicted protein [Thalassiosira pseudonana CCMP1335]	SF1	K13095	GO:0003723;GO:0008270	1683	C	P	C	P	3	S
gi|224000916|ref|XP_002290130.1|	predicted protein [Thalassiosira pseudonana CCMP1335]	SF1	K13095	GO:0003723;GO:0008270	1713	A	Q	A	Q	3	S
gi|219113369|ref|XP_002186268.1|	predicted protein [Phaeodactylum tricornutum CCAP 1055/1]	SETX, ALS4	K10706	GO:0034470;GO:0005524;GO:0017111	963	A	E	A	E	3	S
gi|219113369|ref|XP_002186268.1|	predicted protein [Phaeodactylum tricornutum CCAP 1055/1]	SETX, ALS4	K10706	GO:0034470;GO:0005524;GO:0017111	1038	G	C	G	C	3	S
gi|219113369|ref|XP_002186268.1|	predicted protein [Phaeodactylum tricornutum CCAP 1055/1]	SETX, ALS4	K10706	GO:0034470;GO:0005524;GO:0017111	1053	C	T	C	T	3	S
gi|219113369|ref|XP_002186268.1|	predicted protein [Phaeodactylum tricornutum CCAP 1055/1]	SETX, ALS4	K10706	GO:0034470;GO:0005524;GO:0017111	1059	T	V	T	V	3	S
gi|219113369|ref|XP_002186268.1|	predicted protein [Phaeodactylum tricornutum CCAP 1055/1]	SETX, ALS4	K10706	GO:0034470;GO:0005524;GO:0017111	1074	T	V	T	V	3	S
gi|219121061|ref|XP_002185762.1|	ribulose-1,5-bisphosphate carboxylase/oxygenase small subunit N-methyltransferase I [Phaeodactylum tricornutum CCAP 1055/1]	SETD6	K05302	GO:0008168;GO:0032259	321	G	G	G	G	3	S
gi|219121061|ref|XP_002185762.1|	ribulose-1,5-bisphosphate carboxylase/oxygenase small subunit N-methyltransferase I [Phaeodactylum tricornutum CCAP 1055/1]	SETD6	K05302	GO:0008168;GO:0032259	384	C	S	C	S	3	S
gi|219121061|ref|XP_002185762.1|	ribulose-1,5-bisphosphate carboxylase/oxygenase small subunit N-methyltransferase I [Phaeodactylum tricornutum CCAP 1055/1]	SETD6	K05302	GO:0008168;GO:0032259	390	G	G	G	G	3	S
gi|219121061|ref|XP_002185762.1|	ribulose-1,5-bisphosphate carboxylase/oxygenase small subunit N-methyltransferase I [Phaeodactylum tricornutum CCAP 1055/1]	SETD6	K05302	GO:0008168;GO:0032259	408	A	E	A	E	3	S
gi|219121061|ref|XP_002185762.1|	ribulose-1,5-bisphosphate carboxylase/oxygenase small subunit N-methyltransferase I [Phaeodactylum tricornutum CCAP 1055/1]	SETD6	K05302	GO:0008168;GO:0032259	432	G	C	G	C	3	S
gi|219121061|ref|XP_002185762.1|	ribulose-1,5-bisphosphate carboxylase/oxygenase small subunit N-methyltransferase I [Phaeodactylum tricornutum CCAP 1055/1]	SETD6	K05302	GO:0008168;GO:0032259	507	A	E	A	E	3	S
gi|219121061|ref|XP_002185762.1|	ribulose-1,5-bisphosphate carboxylase/oxygenase small subunit N-methyltransferase I [Phaeodactylum tricornutum CCAP 1055/1]	SETD6	K05302	GO:0008168;GO:0032259	534	G	G	G	G	3	S
gi|219121061|ref|XP_002185762.1|	ribulose-1,5-bisphosphate carboxylase/oxygenase small subunit N-methyltransferase I [Phaeodactylum tricornutum CCAP 1055/1]	SETD6	K05302	GO:0008168;GO:0032259	561	A	K	A	K	3	S
gi|219121061|ref|XP_002185762.1|	ribulose-1,5-bisphosphate carboxylase/oxygenase small subunit N-methyltransferase I [Phaeodactylum tricornutum CCAP 1055/1]	SETD6	K05302	GO:0008168;GO:0032259	600	G	G	G	G	3	S
gi|219121061|ref|XP_002185762.1|	ribulose-1,5-bisphosphate carboxylase/oxygenase small subunit N-methyltransferase I [Phaeodactylum tricornutum CCAP 1055/1]	SETD6	K05302	GO:0008168;GO:0032259	603	C	S	C	S	3	S
gi|219121061|ref|XP_002185762.1|	ribulose-1,5-bisphosphate carboxylase/oxygenase small subunit N-methyltransferase I [Phaeodactylum tricornutum CCAP 1055/1]	SETD6	K05302	GO:0008168;GO:0032259	663	T	I	T	I	3	S
gi|219121061|ref|XP_002185762.1|	ribulose-1,5-bisphosphate carboxylase/oxygenase small subunit N-methyltransferase I [Phaeodactylum tricornutum CCAP 1055/1]	SETD6	K05302	GO:0008168;GO:0032259	744	T	L	T	L	3	S
gi|219121061|ref|XP_002185762.1|	ribulose-1,5-bisphosphate carboxylase/oxygenase small subunit N-methyltransferase I [Phaeodactylum tricornutum CCAP 1055/1]	SETD6	K05302	GO:0008168;GO:0032259	786	C	P	C	P	3	S
gi|219121061|ref|XP_002185762.1|	ribulose-1,5-bisphosphate carboxylase/oxygenase small subunit N-methyltransferase I [Phaeodactylum tricornutum CCAP 1055/1]	SETD6	K05302	GO:0008168;GO:0032259	813	C	P	C	P	3	S
gi|219121061|ref|XP_002185762.1|	ribulose-1,5-bisphosphate carboxylase/oxygenase small subunit N-methyltransferase I [Phaeodactylum tricornutum CCAP 1055/1]	SETD6	K05302	GO:0008168;GO:0032259	816	A	K	A	K	3	S
gi|219121061|ref|XP_002185762.1|	ribulose-1,5-bisphosphate carboxylase/oxygenase small subunit N-methyltransferase I [Phaeodactylum tricornutum CCAP 1055/1]	SETD6	K05302	GO:0008168;GO:0032259	870	T	I	T	I	3	S
gi|219121061|ref|XP_002185762.1|	ribulose-1,5-bisphosphate carboxylase/oxygenase small subunit N-methyltransferase I [Phaeodactylum tricornutum CCAP 1055/1]	SETD6	K05302	GO:0008168;GO:0032259	993	G	R	G	R	3	S
gi|219121061|ref|XP_002185762.1|	ribulose-1,5-bisphosphate carboxylase/oxygenase small subunit N-methyltransferase I [Phaeodactylum tricornutum CCAP 1055/1]	SETD6	K05302	GO:0008168;GO:0032259	1125	A	Q	A	Q	3	S
gi|219121061|ref|XP_002185762.1|	ribulose-1,5-bisphosphate carboxylase/oxygenase small subunit N-methyltransferase I [Phaeodactylum tricornutum CCAP 1055/1]	SETD6	K05302	GO:0008168;GO:0032259	1134	C	P	C	P	3	S
gi|219121061|ref|XP_002185762.1|	ribulose-1,5-bisphosphate carboxylase/oxygenase small subunit N-methyltransferase I [Phaeodactylum tricornutum CCAP 1055/1]	SETD6	K05302	GO:0008168;GO:0032259	1179	A	Q	A	Q	3	S
gi|219121061|ref|XP_002185762.1|	ribulose-1,5-bisphosphate carboxylase/oxygenase small subunit N-methyltransferase I [Phaeodactylum tricornutum CCAP 1055/1]	SETD6	K05302	GO:0008168;GO:0032259	1191	A	Q	A	Q	3	S
gi|219121061|ref|XP_002185762.1|	ribulose-1,5-bisphosphate carboxylase/oxygenase small subunit N-methyltransferase I [Phaeodactylum tricornutum CCAP 1055/1]	SETD6	K05302	GO:0008168;GO:0032259	1248	C	A	C	A	3	S
gi|219121061|ref|XP_002185762.1|	ribulose-1,5-bisphosphate carboxylase/oxygenase small subunit N-methyltransferase I [Phaeodactylum tricornutum CCAP 1055/1]	SETD6	K05302	GO:0008168;GO:0032259	1254	C	T	C	T	3	S
gi|219121061|ref|XP_002185762.1|	ribulose-1,5-bisphosphate carboxylase/oxygenase small subunit N-methyltransferase I [Phaeodactylum tricornutum CCAP 1055/1]	SETD6	K05302	GO:0008168;GO:0032259	1311	A	K	A	K	3	S
gi|219121061|ref|XP_002185762.1|	ribulose-1,5-bisphosphate carboxylase/oxygenase small subunit N-methyltransferase I [Phaeodactylum tricornutum CCAP 1055/1]	SETD6	K05302	GO:0008168;GO:0032259	1347	A	E	A	E	3	S
gi|219121061|ref|XP_002185762.1|	ribulose-1,5-bisphosphate carboxylase/oxygenase small subunit N-methyltransferase I [Phaeodactylum tricornutum CCAP 1055/1]	SETD6	K05302	GO:0008168;GO:0032259	1356	A	H	A	H	3	S
gi|219121061|ref|XP_002185762.1|	ribulose-1,5-bisphosphate carboxylase/oxygenase small subunit N-methyltransferase I [Phaeodactylum tricornutum CCAP 1055/1]	SETD6	K05302	GO:0008168;GO:0032259	1398	A	*	A	*	3	S
gi|224005356|ref|XP_002296329.1|	predicted protein [Thalassiosira pseudonana CCMP1335]	SETD1, SET1	K11422	GO:0018024;GO:0034968;GO:0005634;GO:0006554	2304	T	V	T	V	3	S
gi|224005356|ref|XP_002296329.1|	predicted protein [Thalassiosira pseudonana CCMP1335]	SETD1, SET1	K11422	GO:0018024;GO:0034968;GO:0005634;GO:0006554	3501	T	I	T	I	3	S
gi|224005356|ref|XP_002296329.1|	predicted protein [Thalassiosira pseudonana CCMP1335]	SETD1, SET1	K11422	GO:0018024;GO:0034968;GO:0005634;GO:0006554	3507	A	Y	A	Y	3	S
gi|224005356|ref|XP_002296329.1|	predicted protein [Thalassiosira pseudonana CCMP1335]	SETD1, SET1	K11422	GO:0018024;GO:0034968;GO:0005634;GO:0006554	4047	C	A	C	A	3	S
gi|224001546|ref|XP_002290445.1|	D-3-phosphoglycerate dehydrogenase [Thalassiosira pseudonana CCMP1335]	serA, PHGDH	K00058	GO:0006544;GO:0006564;GO:0055114;GO:0051287;GO:0006566;GO:0004617	216	C	P	C	P	3	S
gi|219129623|ref|XP_002184983.1|	transport protein Sec61 alpha subunit [Phaeodactylum tricornutum CCAP 1055/1]	SEC61A	K10956	GO:0015031;GO:0016021	741	C	T	C	T	3	S
gi|219129623|ref|XP_002184983.1|	transport protein Sec61 alpha subunit [Phaeodactylum tricornutum CCAP 1055/1]	SEC61A	K10956	GO:0015031;GO:0016021	855	C	T	C	T	3	S
gi|219129623|ref|XP_002184983.1|	transport protein Sec61 alpha subunit [Phaeodactylum tricornutum CCAP 1055/1]	SEC61A	K10956	GO:0015031;GO:0016021	858	C	S	C	S	3	S
gi|219129623|ref|XP_002184983.1|	transport protein Sec61 alpha subunit [Phaeodactylum tricornutum CCAP 1055/1]	SEC61A	K10956	GO:0015031;GO:0016021	891	T	V	T	V	3	S
gi|219129623|ref|XP_002184983.1|	transport protein Sec61 alpha subunit [Phaeodactylum tricornutum CCAP 1055/1]	SEC61A	K10956	GO:0015031;GO:0016021	978	C	A	C	A	3	S
gi|219129623|ref|XP_002184983.1|	transport protein Sec61 alpha subunit [Phaeodactylum tricornutum CCAP 1055/1]	SEC61A	K10956	GO:0015031;GO:0016021	990	C	P	C	P	3	S
gi|219129623|ref|XP_002184983.1|	transport protein Sec61 alpha subunit [Phaeodactylum tricornutum CCAP 1055/1]	SEC61A	K10956	GO:0015031;GO:0016021	1008	T	V	T	V	3	S
gi|219129623|ref|XP_002184983.1|	transport protein Sec61 alpha subunit [Phaeodactylum tricornutum CCAP 1055/1]	SEC61A	K10956	GO:0015031;GO:0016021	1041	C	S	C	S	3	S
gi|219129623|ref|XP_002184983.1|	transport protein Sec61 alpha subunit [Phaeodactylum tricornutum CCAP 1055/1]	SEC61A	K10956	GO:0015031;GO:0016021	1059	T	I	T	I	3	S
gi|219129623|ref|XP_002184983.1|	transport protein Sec61 alpha subunit [Phaeodactylum tricornutum CCAP 1055/1]	SEC61A	K10956	GO:0015031;GO:0016021	1152	C	S	C	S	3	S
gi|224002503|ref|XP_002290923.1|	predicted protein [Thalassiosira pseudonana CCMP1335]	SEC31	K14005	_	1035	T	F	T	F	3	S
gi|224002503|ref|XP_002290923.1|	predicted protein [Thalassiosira pseudonana CCMP1335]	SEC31	K14005	_	2424	C	A	C	A	3	S
gi|224002503|ref|XP_002290923.1|	predicted protein [Thalassiosira pseudonana CCMP1335]	SEC31	K14005	_	3387	T	L	T	L	3	S
gi|219126752|ref|XP_002183614.1|	predicted protein [Phaeodactylum tricornutum CCAP 1055/1]	SEC31	K14005	_	267	C	S	C	S	3	S
gi|219126752|ref|XP_002183614.1|	predicted protein [Phaeodactylum tricornutum CCAP 1055/1]	SEC31	K14005	_	270	G	S	G	S	3	S
gi|219126752|ref|XP_002183614.1|	predicted protein [Phaeodactylum tricornutum CCAP 1055/1]	SEC31	K14005	_	273	G	G	G	G	3	S
gi|219126752|ref|XP_002183614.1|	predicted protein [Phaeodactylum tricornutum CCAP 1055/1]	SEC31	K14005	_	276	C	A	C	A	3	S
gi|219126752|ref|XP_002183614.1|	predicted protein [Phaeodactylum tricornutum CCAP 1055/1]	SEC31	K14005	_	279	C	T	C	T	3	S
gi|219126752|ref|XP_002183614.1|	predicted protein [Phaeodactylum tricornutum CCAP 1055/1]	SEC31	K14005	_	288	A	Y	A	Y	3	S
gi|219126752|ref|XP_002183614.1|	predicted protein [Phaeodactylum tricornutum CCAP 1055/1]	SEC31	K14005	_	297	C	T	C	T	3	S
gi|219113829|ref|XP_002186498.1|	succinate dehydrogenase flavoprotein [Phaeodactylum tricornutum CCAP 1055/1]	SDHA, SDH1	K00234	GO:0050660;GO:0006118;GO:0045281;GO:0022904;GO:0009055;GO:0050897;GO:0005743;GO:0006105;GO:0005524;GO:0006121;GO:0006099;GO:0006119;GO:0005749;GO:0022900;GO:0005618;GO:0005794;GO:0008177	81	C	S	C	S	3	S
gi|219113829|ref|XP_002186498.1|	succinate dehydrogenase flavoprotein [Phaeodactylum tricornutum CCAP 1055/1]	SDHA, SDH1	K00234	GO:0050660;GO:0006118;GO:0045281;GO:0022904;GO:0009055;GO:0050897;GO:0005743;GO:0006105;GO:0005524;GO:0006121;GO:0006099;GO:0006119;GO:0005749;GO:0022900;GO:0005618;GO:0005794;GO:0008177	93	A	D	A	D	3	S
gi|219113829|ref|XP_002186498.1|	succinate dehydrogenase flavoprotein [Phaeodactylum tricornutum CCAP 1055/1]	SDHA, SDH1	K00234	GO:0050660;GO:0006118;GO:0045281;GO:0022904;GO:0009055;GO:0050897;GO:0005743;GO:0006105;GO:0005524;GO:0006121;GO:0006099;GO:0006119;GO:0005749;GO:0022900;GO:0005618;GO:0005794;GO:0008177	99	C	T	C	T	3	S
gi|219113829|ref|XP_002186498.1|	succinate dehydrogenase flavoprotein [Phaeodactylum tricornutum CCAP 1055/1]	SDHA, SDH1	K00234	GO:0050660;GO:0006118;GO:0045281;GO:0022904;GO:0009055;GO:0050897;GO:0005743;GO:0006105;GO:0005524;GO:0006121;GO:0006099;GO:0006119;GO:0005749;GO:0022900;GO:0005618;GO:0005794;GO:0008177	108	A	D	A	D	3	S
gi|219113829|ref|XP_002186498.1|	succinate dehydrogenase flavoprotein [Phaeodactylum tricornutum CCAP 1055/1]	SDHA, SDH1	K00234	GO:0050660;GO:0006118;GO:0045281;GO:0022904;GO:0009055;GO:0050897;GO:0005743;GO:0006105;GO:0005524;GO:0006121;GO:0006099;GO:0006119;GO:0005749;GO:0022900;GO:0005618;GO:0005794;GO:0008177	111	A	H	A	H	3	S
gi|219113829|ref|XP_002186498.1|	succinate dehydrogenase flavoprotein [Phaeodactylum tricornutum CCAP 1055/1]	SDHA, SDH1	K00234	GO:0050660;GO:0006118;GO:0045281;GO:0022904;GO:0009055;GO:0050897;GO:0005743;GO:0006105;GO:0005524;GO:0006121;GO:0006099;GO:0006119;GO:0005749;GO:0022900;GO:0005618;GO:0005794;GO:0008177	747	C	T	C	T	3	S
gi|219113829|ref|XP_002186498.1|	succinate dehydrogenase flavoprotein [Phaeodactylum tricornutum CCAP 1055/1]	SDHA, SDH1	K00234	GO:0050660;GO:0006118;GO:0045281;GO:0022904;GO:0009055;GO:0050897;GO:0005743;GO:0006105;GO:0005524;GO:0006121;GO:0006099;GO:0006119;GO:0005749;GO:0022900;GO:0005618;GO:0005794;GO:0008177	753	C	T	C	T	3	S
gi|219113829|ref|XP_002186498.1|	succinate dehydrogenase flavoprotein [Phaeodactylum tricornutum CCAP 1055/1]	SDHA, SDH1	K00234	GO:0050660;GO:0006118;GO:0045281;GO:0022904;GO:0009055;GO:0050897;GO:0005743;GO:0006105;GO:0005524;GO:0006121;GO:0006099;GO:0006119;GO:0005749;GO:0022900;GO:0005618;GO:0005794;GO:0008177	813	T	V	T	V	3	S
gi|219113829|ref|XP_002186498.1|	succinate dehydrogenase flavoprotein [Phaeodactylum tricornutum CCAP 1055/1]	SDHA, SDH1	K00234	GO:0050660;GO:0006118;GO:0045281;GO:0022904;GO:0009055;GO:0050897;GO:0005743;GO:0006105;GO:0005524;GO:0006121;GO:0006099;GO:0006119;GO:0005749;GO:0022900;GO:0005618;GO:0005794;GO:0008177	834	T	I	T	I	3	S
gi|219113829|ref|XP_002186498.1|	succinate dehydrogenase flavoprotein [Phaeodactylum tricornutum CCAP 1055/1]	SDHA, SDH1	K00234	GO:0050660;GO:0006118;GO:0045281;GO:0022904;GO:0009055;GO:0050897;GO:0005743;GO:0006105;GO:0005524;GO:0006121;GO:0006099;GO:0006119;GO:0005749;GO:0022900;GO:0005618;GO:0005794;GO:0008177	1377	A	H	A	H	3	S
gi|219113829|ref|XP_002186498.1|	succinate dehydrogenase flavoprotein [Phaeodactylum tricornutum CCAP 1055/1]	SDHA, SDH1	K00234	GO:0050660;GO:0006118;GO:0045281;GO:0022904;GO:0009055;GO:0050897;GO:0005743;GO:0006105;GO:0005524;GO:0006121;GO:0006099;GO:0006119;GO:0005749;GO:0022900;GO:0005618;GO:0005794;GO:0008177	1380	A	K	A	K	3	S
gi|219113829|ref|XP_002186498.1|	succinate dehydrogenase flavoprotein [Phaeodactylum tricornutum CCAP 1055/1]	SDHA, SDH1	K00234	GO:0050660;GO:0006118;GO:0045281;GO:0022904;GO:0009055;GO:0050897;GO:0005743;GO:0006105;GO:0005524;GO:0006121;GO:0006099;GO:0006119;GO:0005749;GO:0022900;GO:0005618;GO:0005794;GO:0008177	1383	C	P	C	P	3	S
gi|219113829|ref|XP_002186498.1|	succinate dehydrogenase flavoprotein [Phaeodactylum tricornutum CCAP 1055/1]	SDHA, SDH1	K00234	GO:0050660;GO:0006118;GO:0045281;GO:0022904;GO:0009055;GO:0050897;GO:0005743;GO:0006105;GO:0005524;GO:0006121;GO:0006099;GO:0006119;GO:0005749;GO:0022900;GO:0005618;GO:0005794;GO:0008177	1395	T	I	T	I	3	S
gi|219113829|ref|XP_002186498.1|	succinate dehydrogenase flavoprotein [Phaeodactylum tricornutum CCAP 1055/1]	SDHA, SDH1	K00234	GO:0050660;GO:0006118;GO:0045281;GO:0022904;GO:0009055;GO:0050897;GO:0005743;GO:0006105;GO:0005524;GO:0006121;GO:0006099;GO:0006119;GO:0005749;GO:0022900;GO:0005618;GO:0005794;GO:0008177	1419	G	G	G	G	3	S
gi|219113829|ref|XP_002186498.1|	succinate dehydrogenase flavoprotein [Phaeodactylum tricornutum CCAP 1055/1]	SDHA, SDH1	K00234	GO:0050660;GO:0006118;GO:0045281;GO:0022904;GO:0009055;GO:0050897;GO:0005743;GO:0006105;GO:0005524;GO:0006121;GO:0006099;GO:0006119;GO:0005749;GO:0022900;GO:0005618;GO:0005794;GO:0008177	1428	C	S	C	S	3	S
gi|219113829|ref|XP_002186498.1|	succinate dehydrogenase flavoprotein [Phaeodactylum tricornutum CCAP 1055/1]	SDHA, SDH1	K00234	GO:0050660;GO:0006118;GO:0045281;GO:0022904;GO:0009055;GO:0050897;GO:0005743;GO:0006105;GO:0005524;GO:0006121;GO:0006099;GO:0006119;GO:0005749;GO:0022900;GO:0005618;GO:0005794;GO:0008177	1446	A	K	A	K	3	S
gi|219113829|ref|XP_002186498.1|	succinate dehydrogenase flavoprotein [Phaeodactylum tricornutum CCAP 1055/1]	SDHA, SDH1	K00234	GO:0050660;GO:0006118;GO:0045281;GO:0022904;GO:0009055;GO:0050897;GO:0005743;GO:0006105;GO:0005524;GO:0006121;GO:0006099;GO:0006119;GO:0005749;GO:0022900;GO:0005618;GO:0005794;GO:0008177	1683	C	S	C	S	3	S
gi|219118531|ref|XP_002180036.1|	predicted protein [Phaeodactylum tricornutum CCAP 1055/1]	SDA1, SDAD1	K14856	GO:0000055;GO:0042273;GO:0030036;GO:0071840	42	C	S	C	S	3	S
gi|219118531|ref|XP_002180036.1|	predicted protein [Phaeodactylum tricornutum CCAP 1055/1]	SDA1, SDAD1	K14856	GO:0000055;GO:0042273;GO:0030036;GO:0071840	192	A	D	A	D	3	S
gi|219118531|ref|XP_002180036.1|	predicted protein [Phaeodactylum tricornutum CCAP 1055/1]	SDA1, SDAD1	K14856	GO:0000055;GO:0042273;GO:0030036;GO:0071840	195	G	G	G	G	3	S
gi|219118531|ref|XP_002180036.1|	predicted protein [Phaeodactylum tricornutum CCAP 1055/1]	SDA1, SDAD1	K14856	GO:0000055;GO:0042273;GO:0030036;GO:0071840	204	A	D	A	D	3	S
gi|219118531|ref|XP_002180036.1|	predicted protein [Phaeodactylum tricornutum CCAP 1055/1]	SDA1, SDAD1	K14856	GO:0000055;GO:0042273;GO:0030036;GO:0071840	207	A	Y	A	Y	3	S
gi|219118531|ref|XP_002180036.1|	predicted protein [Phaeodactylum tricornutum CCAP 1055/1]	SDA1, SDAD1	K14856	GO:0000055;GO:0042273;GO:0030036;GO:0071840	210	A	Q	A	Q	3	S
gi|219118531|ref|XP_002180036.1|	predicted protein [Phaeodactylum tricornutum CCAP 1055/1]	SDA1, SDAD1	K14856	GO:0000055;GO:0042273;GO:0030036;GO:0071840	216	G	R	G	R	3	S
gi|219118531|ref|XP_002180036.1|	predicted protein [Phaeodactylum tricornutum CCAP 1055/1]	SDA1, SDAD1	K14856	GO:0000055;GO:0042273;GO:0030036;GO:0071840	234	C	P	C	P	3	S
gi|219118531|ref|XP_002180036.1|	predicted protein [Phaeodactylum tricornutum CCAP 1055/1]	SDA1, SDAD1	K14856	GO:0000055;GO:0042273;GO:0030036;GO:0071840	273	C	S	C	S	3	S
gi|219118531|ref|XP_002180036.1|	predicted protein [Phaeodactylum tricornutum CCAP 1055/1]	SDA1, SDAD1	K14856	GO:0000055;GO:0042273;GO:0030036;GO:0071840	366	T	L	T	L	3	S
gi|219118531|ref|XP_002180036.1|	predicted protein [Phaeodactylum tricornutum CCAP 1055/1]	SDA1, SDAD1	K14856	GO:0000055;GO:0042273;GO:0030036;GO:0071840	375	A	K	A	K	3	S
gi|219118531|ref|XP_002180036.1|	predicted protein [Phaeodactylum tricornutum CCAP 1055/1]	SDA1, SDAD1	K14856	GO:0000055;GO:0042273;GO:0030036;GO:0071840	381	T	V	T	V	3	S
gi|219118531|ref|XP_002180036.1|	predicted protein [Phaeodactylum tricornutum CCAP 1055/1]	SDA1, SDAD1	K14856	GO:0000055;GO:0042273;GO:0030036;GO:0071840	384	C	A	C	A	3	S
gi|219118531|ref|XP_002180036.1|	predicted protein [Phaeodactylum tricornutum CCAP 1055/1]	SDA1, SDAD1	K14856	GO:0000055;GO:0042273;GO:0030036;GO:0071840	405	C	P	C	P	3	S
gi|219118531|ref|XP_002180036.1|	predicted protein [Phaeodactylum tricornutum CCAP 1055/1]	SDA1, SDAD1	K14856	GO:0000055;GO:0042273;GO:0030036;GO:0071840	420	T	F	T	F	3	S
gi|219118531|ref|XP_002180036.1|	predicted protein [Phaeodactylum tricornutum CCAP 1055/1]	SDA1, SDAD1	K14856	GO:0000055;GO:0042273;GO:0030036;GO:0071840	432	T	V	T	V	3	S
gi|219118531|ref|XP_002180036.1|	predicted protein [Phaeodactylum tricornutum CCAP 1055/1]	SDA1, SDAD1	K14856	GO:0000055;GO:0042273;GO:0030036;GO:0071840	438	A	D	A	D	3	S
gi|219118531|ref|XP_002180036.1|	predicted protein [Phaeodactylum tricornutum CCAP 1055/1]	SDA1, SDAD1	K14856	GO:0000055;GO:0042273;GO:0030036;GO:0071840	441	A	K	A	K	3	S
gi|219118531|ref|XP_002180036.1|	predicted protein [Phaeodactylum tricornutum CCAP 1055/1]	SDA1, SDAD1	K14856	GO:0000055;GO:0042273;GO:0030036;GO:0071840	456	A	Y	A	Y	3	S
gi|219118531|ref|XP_002180036.1|	predicted protein [Phaeodactylum tricornutum CCAP 1055/1]	SDA1, SDAD1	K14856	GO:0000055;GO:0042273;GO:0030036;GO:0071840	468	T	V	T	V	3	S
gi|219118531|ref|XP_002180036.1|	predicted protein [Phaeodactylum tricornutum CCAP 1055/1]	SDA1, SDAD1	K14856	GO:0000055;GO:0042273;GO:0030036;GO:0071840	477	A	N	A	N	3	S
gi|219118531|ref|XP_002180036.1|	predicted protein [Phaeodactylum tricornutum CCAP 1055/1]	SDA1, SDAD1	K14856	GO:0000055;GO:0042273;GO:0030036;GO:0071840	495	C	T	C	T	3	S
gi|219118531|ref|XP_002180036.1|	predicted protein [Phaeodactylum tricornutum CCAP 1055/1]	SDA1, SDAD1	K14856	GO:0000055;GO:0042273;GO:0030036;GO:0071840	582	C	A	C	A	3	S
gi|219118531|ref|XP_002180036.1|	predicted protein [Phaeodactylum tricornutum CCAP 1055/1]	SDA1, SDAD1	K14856	GO:0000055;GO:0042273;GO:0030036;GO:0071840	585	C	A	C	A	3	S
gi|219118531|ref|XP_002180036.1|	predicted protein [Phaeodactylum tricornutum CCAP 1055/1]	SDA1, SDAD1	K14856	GO:0000055;GO:0042273;GO:0030036;GO:0071840	594	A	Y	A	Y	3	S
gi|219118531|ref|XP_002180036.1|	predicted protein [Phaeodactylum tricornutum CCAP 1055/1]	SDA1, SDAD1	K14856	GO:0000055;GO:0042273;GO:0030036;GO:0071840	597	T	V	T	V	3	S
gi|219118531|ref|XP_002180036.1|	predicted protein [Phaeodactylum tricornutum CCAP 1055/1]	SDA1, SDAD1	K14856	GO:0000055;GO:0042273;GO:0030036;GO:0071840	612	C	A	C	A	3	S
gi|219118531|ref|XP_002180036.1|	predicted protein [Phaeodactylum tricornutum CCAP 1055/1]	SDA1, SDAD1	K14856	GO:0000055;GO:0042273;GO:0030036;GO:0071840	615	C	S	C	S	3	S
gi|219118531|ref|XP_002180036.1|	predicted protein [Phaeodactylum tricornutum CCAP 1055/1]	SDA1, SDAD1	K14856	GO:0000055;GO:0042273;GO:0030036;GO:0071840	621	C	T	C	T	3	S
gi|219118531|ref|XP_002180036.1|	predicted protein [Phaeodactylum tricornutum CCAP 1055/1]	SDA1, SDAD1	K14856	GO:0000055;GO:0042273;GO:0030036;GO:0071840	627	C	A	C	A	3	S
gi|219118531|ref|XP_002180036.1|	predicted protein [Phaeodactylum tricornutum CCAP 1055/1]	SDA1, SDAD1	K14856	GO:0000055;GO:0042273;GO:0030036;GO:0071840	633	T	F	T	F	3	S
gi|219118531|ref|XP_002180036.1|	predicted protein [Phaeodactylum tricornutum CCAP 1055/1]	SDA1, SDAD1	K14856	GO:0000055;GO:0042273;GO:0030036;GO:0071840	660	A	E	A	E	3	S
gi|219118531|ref|XP_002180036.1|	predicted protein [Phaeodactylum tricornutum CCAP 1055/1]	SDA1, SDAD1	K14856	GO:0000055;GO:0042273;GO:0030036;GO:0071840	687	A	Q	A	Q	3	S
gi|219118531|ref|XP_002180036.1|	predicted protein [Phaeodactylum tricornutum CCAP 1055/1]	SDA1, SDAD1	K14856	GO:0000055;GO:0042273;GO:0030036;GO:0071840	900	G	R	G	R	3	S
gi|219118531|ref|XP_002180036.1|	predicted protein [Phaeodactylum tricornutum CCAP 1055/1]	SDA1, SDAD1	K14856	GO:0000055;GO:0042273;GO:0030036;GO:0071840	915	C	T	C	T	3	S
gi|219118531|ref|XP_002180036.1|	predicted protein [Phaeodactylum tricornutum CCAP 1055/1]	SDA1, SDAD1	K14856	GO:0000055;GO:0042273;GO:0030036;GO:0071840	963	T	V	T	V	3	S
gi|219118531|ref|XP_002180036.1|	predicted protein [Phaeodactylum tricornutum CCAP 1055/1]	SDA1, SDAD1	K14856	GO:0000055;GO:0042273;GO:0030036;GO:0071840	972	A	H	A	H	3	S
gi|219118531|ref|XP_002180036.1|	predicted protein [Phaeodactylum tricornutum CCAP 1055/1]	SDA1, SDAD1	K14856	GO:0000055;GO:0042273;GO:0030036;GO:0071840	987	A	N	A	N	3	S
gi|219118531|ref|XP_002180036.1|	predicted protein [Phaeodactylum tricornutum CCAP 1055/1]	SDA1, SDAD1	K14856	GO:0000055;GO:0042273;GO:0030036;GO:0071840	993	A	Y	A	Y	3	S
gi|219118531|ref|XP_002180036.1|	predicted protein [Phaeodactylum tricornutum CCAP 1055/1]	SDA1, SDAD1	K14856	GO:0000055;GO:0042273;GO:0030036;GO:0071840	996	C	P	C	P	3	S
gi|219118531|ref|XP_002180036.1|	predicted protein [Phaeodactylum tricornutum CCAP 1055/1]	SDA1, SDAD1	K14856	GO:0000055;GO:0042273;GO:0030036;GO:0071840	1008	A	Y	A	Y	3	S
gi|219118531|ref|XP_002180036.1|	predicted protein [Phaeodactylum tricornutum CCAP 1055/1]	SDA1, SDAD1	K14856	GO:0000055;GO:0042273;GO:0030036;GO:0071840	1014	A	Q	A	Q	3	S
gi|219118531|ref|XP_002180036.1|	predicted protein [Phaeodactylum tricornutum CCAP 1055/1]	SDA1, SDAD1	K14856	GO:0000055;GO:0042273;GO:0030036;GO:0071840	1035	G	C	G	C	3	S
gi|219118531|ref|XP_002180036.1|	predicted protein [Phaeodactylum tricornutum CCAP 1055/1]	SDA1, SDAD1	K14856	GO:0000055;GO:0042273;GO:0030036;GO:0071840	1068	A	H	A	H	3	S
gi|219118531|ref|XP_002180036.1|	predicted protein [Phaeodactylum tricornutum CCAP 1055/1]	SDA1, SDAD1	K14856	GO:0000055;GO:0042273;GO:0030036;GO:0071840	1110	A	K	A	K	3	S
gi|219118531|ref|XP_002180036.1|	predicted protein [Phaeodactylum tricornutum CCAP 1055/1]	SDA1, SDAD1	K14856	GO:0000055;GO:0042273;GO:0030036;GO:0071840	1131	G	C	G	C	3	S
gi|219118531|ref|XP_002180036.1|	predicted protein [Phaeodactylum tricornutum CCAP 1055/1]	SDA1, SDAD1	K14856	GO:0000055;GO:0042273;GO:0030036;GO:0071840	1170	T	V	T	V	3	S
gi|219118531|ref|XP_002180036.1|	predicted protein [Phaeodactylum tricornutum CCAP 1055/1]	SDA1, SDAD1	K14856	GO:0000055;GO:0042273;GO:0030036;GO:0071840	1221	C	S	C	S	3	S
gi|219118531|ref|XP_002180036.1|	predicted protein [Phaeodactylum tricornutum CCAP 1055/1]	SDA1, SDAD1	K14856	GO:0000055;GO:0042273;GO:0030036;GO:0071840	1356	C	S	C	S	3	S
gi|219118531|ref|XP_002180036.1|	predicted protein [Phaeodactylum tricornutum CCAP 1055/1]	SDA1, SDAD1	K14856	GO:0000055;GO:0042273;GO:0030036;GO:0071840	1371	G	R	G	R	3	S
gi|219118531|ref|XP_002180036.1|	predicted protein [Phaeodactylum tricornutum CCAP 1055/1]	SDA1, SDAD1	K14856	GO:0000055;GO:0042273;GO:0030036;GO:0071840	1380	A	D	A	D	3	S
gi|219118531|ref|XP_002180036.1|	predicted protein [Phaeodactylum tricornutum CCAP 1055/1]	SDA1, SDAD1	K14856	GO:0000055;GO:0042273;GO:0030036;GO:0071840	1476	A	E	A	E	3	S
gi|219118531|ref|XP_002180036.1|	predicted protein [Phaeodactylum tricornutum CCAP 1055/1]	SDA1, SDAD1	K14856	GO:0000055;GO:0042273;GO:0030036;GO:0071840	1512	A	D	A	D	3	S
gi|219118531|ref|XP_002180036.1|	predicted protein [Phaeodactylum tricornutum CCAP 1055/1]	SDA1, SDAD1	K14856	GO:0000055;GO:0042273;GO:0030036;GO:0071840	1515	A	D	A	D	3	S
gi|219118531|ref|XP_002180036.1|	predicted protein [Phaeodactylum tricornutum CCAP 1055/1]	SDA1, SDAD1	K14856	GO:0000055;GO:0042273;GO:0030036;GO:0071840	1569	A	E	A	E	3	S
gi|219118531|ref|XP_002180036.1|	predicted protein [Phaeodactylum tricornutum CCAP 1055/1]	SDA1, SDAD1	K14856	GO:0000055;GO:0042273;GO:0030036;GO:0071840	1785	A	D	A	D	3	S
gi|219118531|ref|XP_002180036.1|	predicted protein [Phaeodactylum tricornutum CCAP 1055/1]	SDA1, SDAD1	K14856	GO:0000055;GO:0042273;GO:0030036;GO:0071840	1794	A	D	A	D	3	S
gi|219118531|ref|XP_002180036.1|	predicted protein [Phaeodactylum tricornutum CCAP 1055/1]	SDA1, SDAD1	K14856	GO:0000055;GO:0042273;GO:0030036;GO:0071840	1800	C	A	C	A	3	S
gi|219118531|ref|XP_002180036.1|	predicted protein [Phaeodactylum tricornutum CCAP 1055/1]	SDA1, SDAD1	K14856	GO:0000055;GO:0042273;GO:0030036;GO:0071840	1842	T	V	T	V	3	S
gi|219118531|ref|XP_002180036.1|	predicted protein [Phaeodactylum tricornutum CCAP 1055/1]	SDA1, SDAD1	K14856	GO:0000055;GO:0042273;GO:0030036;GO:0071840	1893	G	R	G	R	3	S
gi|219118531|ref|XP_002180036.1|	predicted protein [Phaeodactylum tricornutum CCAP 1055/1]	SDA1, SDAD1	K14856	GO:0000055;GO:0042273;GO:0030036;GO:0071840	1899	A	K	A	K	3	S
gi|219118531|ref|XP_002180036.1|	predicted protein [Phaeodactylum tricornutum CCAP 1055/1]	SDA1, SDAD1	K14856	GO:0000055;GO:0042273;GO:0030036;GO:0071840	1908	G	R	G	R	3	S
gi|219118531|ref|XP_002180036.1|	predicted protein [Phaeodactylum tricornutum CCAP 1055/1]	SDA1, SDAD1	K14856	GO:0000055;GO:0042273;GO:0030036;GO:0071840	1911	G	G	G	G	3	S
gi|219118531|ref|XP_002180036.1|	predicted protein [Phaeodactylum tricornutum CCAP 1055/1]	SDA1, SDAD1	K14856	GO:0000055;GO:0042273;GO:0030036;GO:0071840	1920	C	T	C	T	3	S
gi|219118531|ref|XP_002180036.1|	predicted protein [Phaeodactylum tricornutum CCAP 1055/1]	SDA1, SDAD1	K14856	GO:0000055;GO:0042273;GO:0030036;GO:0071840	1959	G	R	G	R	3	S
gi|219118531|ref|XP_002180036.1|	predicted protein [Phaeodactylum tricornutum CCAP 1055/1]	SDA1, SDAD1	K14856	GO:0000055;GO:0042273;GO:0030036;GO:0071840	1977	G	G	G	G	3	S
gi|224000722|ref|XP_002290033.1|	predicted protein [Thalassiosira pseudonana CCMP1335]	SCD, desC	K00507	GO:0005783;GO:0004768;GO:0016717;GO:0044425;GO:0006629;GO:0055114;GO:0016021;GO:0006633;GO:0016491;GO:0044710	108	T	L	T	L	3	S
gi|224000722|ref|XP_002290033.1|	predicted protein [Thalassiosira pseudonana CCMP1335]	SCD, desC	K00507	GO:0005783;GO:0004768;GO:0016717;GO:0044425;GO:0006629;GO:0055114;GO:0016021;GO:0006633;GO:0016491;GO:0044710	126	G	G	G	G	3	S
gi|224000722|ref|XP_002290033.1|	predicted protein [Thalassiosira pseudonana CCMP1335]	SCD, desC	K00507	GO:0005783;GO:0004768;GO:0016717;GO:0044425;GO:0006629;GO:0055114;GO:0016021;GO:0006633;GO:0016491;GO:0044710	135	C	T	C	T	3	S
gi|224000722|ref|XP_002290033.1|	predicted protein [Thalassiosira pseudonana CCMP1335]	SCD, desC	K00507	GO:0005783;GO:0004768;GO:0016717;GO:0044425;GO:0006629;GO:0055114;GO:0016021;GO:0006633;GO:0016491;GO:0044710	141	A	H	A	H	3	S
gi|224000722|ref|XP_002290033.1|	predicted protein [Thalassiosira pseudonana CCMP1335]	SCD, desC	K00507	GO:0005783;GO:0004768;GO:0016717;GO:0044425;GO:0006629;GO:0055114;GO:0016021;GO:0006633;GO:0016491;GO:0044710	150	A	H	A	H	3	S
gi|224000722|ref|XP_002290033.1|	predicted protein [Thalassiosira pseudonana CCMP1335]	SCD, desC	K00507	GO:0005783;GO:0004768;GO:0016717;GO:0044425;GO:0006629;GO:0055114;GO:0016021;GO:0006633;GO:0016491;GO:0044710	159	C	A	C	A	3	S
gi|224000722|ref|XP_002290033.1|	predicted protein [Thalassiosira pseudonana CCMP1335]	SCD, desC	K00507	GO:0005783;GO:0004768;GO:0016717;GO:0044425;GO:0006629;GO:0055114;GO:0016021;GO:0006633;GO:0016491;GO:0044710	165	T	L	T	L	3	S
gi|224000722|ref|XP_002290033.1|	predicted protein [Thalassiosira pseudonana CCMP1335]	SCD, desC	K00507	GO:0005783;GO:0004768;GO:0016717;GO:0044425;GO:0006629;GO:0055114;GO:0016021;GO:0006633;GO:0016491;GO:0044710	168	G	R	G	R	3	S
gi|224000722|ref|XP_002290033.1|	predicted protein [Thalassiosira pseudonana CCMP1335]	SCD, desC	K00507	GO:0005783;GO:0004768;GO:0016717;GO:0044425;GO:0006629;GO:0055114;GO:0016021;GO:0006633;GO:0016491;GO:0044710	177	T	L	T	L	3	S
gi|224000722|ref|XP_002290033.1|	predicted protein [Thalassiosira pseudonana CCMP1335]	SCD, desC	K00507	GO:0005783;GO:0004768;GO:0016717;GO:0044425;GO:0006629;GO:0055114;GO:0016021;GO:0006633;GO:0016491;GO:0044710	300	C	T	C	T	3	S
gi|224000722|ref|XP_002290033.1|	predicted protein [Thalassiosira pseudonana CCMP1335]	SCD, desC	K00507	GO:0005783;GO:0004768;GO:0016717;GO:0044425;GO:0006629;GO:0055114;GO:0016021;GO:0006633;GO:0016491;GO:0044710	372	T	V	T	V	3	S
gi|224000722|ref|XP_002290033.1|	predicted protein [Thalassiosira pseudonana CCMP1335]	SCD, desC	K00507	GO:0005783;GO:0004768;GO:0016717;GO:0044425;GO:0006629;GO:0055114;GO:0016021;GO:0006633;GO:0016491;GO:0044710	405	T	F	T	F	3	S
gi|224000722|ref|XP_002290033.1|	predicted protein [Thalassiosira pseudonana CCMP1335]	SCD, desC	K00507	GO:0005783;GO:0004768;GO:0016717;GO:0044425;GO:0006629;GO:0055114;GO:0016021;GO:0006633;GO:0016491;GO:0044710	423	A	N	A	N	3	S
gi|224000722|ref|XP_002290033.1|	predicted protein [Thalassiosira pseudonana CCMP1335]	SCD, desC	K00507	GO:0005783;GO:0004768;GO:0016717;GO:0044425;GO:0006629;GO:0055114;GO:0016021;GO:0006633;GO:0016491;GO:0044710	426	T	F	T	F	3	S
gi|224000722|ref|XP_002290033.1|	predicted protein [Thalassiosira pseudonana CCMP1335]	SCD, desC	K00507	GO:0005783;GO:0004768;GO:0016717;GO:0044425;GO:0006629;GO:0055114;GO:0016021;GO:0006633;GO:0016491;GO:0044710	429	T	V	T	V	3	S
gi|224000722|ref|XP_002290033.1|	predicted protein [Thalassiosira pseudonana CCMP1335]	SCD, desC	K00507	GO:0005783;GO:0004768;GO:0016717;GO:0044425;GO:0006629;GO:0055114;GO:0016021;GO:0006633;GO:0016491;GO:0044710	450	A	H	A	H	3	S
gi|224000722|ref|XP_002290033.1|	predicted protein [Thalassiosira pseudonana CCMP1335]	SCD, desC	K00507	GO:0005783;GO:0004768;GO:0016717;GO:0044425;GO:0006629;GO:0055114;GO:0016021;GO:0006633;GO:0016491;GO:0044710	465	A	N	A	N	3	S
gi|224000722|ref|XP_002290033.1|	predicted protein [Thalassiosira pseudonana CCMP1335]	SCD, desC	K00507	GO:0005783;GO:0004768;GO:0016717;GO:0044425;GO:0006629;GO:0055114;GO:0016021;GO:0006633;GO:0016491;GO:0044710	468	C	S	C	S	3	S
gi|224000722|ref|XP_002290033.1|	predicted protein [Thalassiosira pseudonana CCMP1335]	SCD, desC	K00507	GO:0005783;GO:0004768;GO:0016717;GO:0044425;GO:0006629;GO:0055114;GO:0016021;GO:0006633;GO:0016491;GO:0044710	486	A	D	A	D	3	S
gi|224000722|ref|XP_002290033.1|	predicted protein [Thalassiosira pseudonana CCMP1335]	SCD, desC	K00507	GO:0005783;GO:0004768;GO:0016717;GO:0044425;GO:0006629;GO:0055114;GO:0016021;GO:0006633;GO:0016491;GO:0044710	489	C	P	C	P	3	S
gi|224000722|ref|XP_002290033.1|	predicted protein [Thalassiosira pseudonana CCMP1335]	SCD, desC	K00507	GO:0005783;GO:0004768;GO:0016717;GO:0044425;GO:0006629;GO:0055114;GO:0016021;GO:0006633;GO:0016491;GO:0044710	504	C	P	C	P	3	S
gi|224000722|ref|XP_002290033.1|	predicted protein [Thalassiosira pseudonana CCMP1335]	SCD, desC	K00507	GO:0005783;GO:0004768;GO:0016717;GO:0044425;GO:0006629;GO:0055114;GO:0016021;GO:0006633;GO:0016491;GO:0044710	507	C	A	C	A	3	S
gi|224000722|ref|XP_002290033.1|	predicted protein [Thalassiosira pseudonana CCMP1335]	SCD, desC	K00507	GO:0005783;GO:0004768;GO:0016717;GO:0044425;GO:0006629;GO:0055114;GO:0016021;GO:0006633;GO:0016491;GO:0044710	522	C	S	C	S	3	S
gi|224000722|ref|XP_002290033.1|	predicted protein [Thalassiosira pseudonana CCMP1335]	SCD, desC	K00507	GO:0005783;GO:0004768;GO:0016717;GO:0044425;GO:0006629;GO:0055114;GO:0016021;GO:0006633;GO:0016491;GO:0044710	528	G	G	G	G	3	S
gi|224000722|ref|XP_002290033.1|	predicted protein [Thalassiosira pseudonana CCMP1335]	SCD, desC	K00507	GO:0005783;GO:0004768;GO:0016717;GO:0044425;GO:0006629;GO:0055114;GO:0016021;GO:0006633;GO:0016491;GO:0044710	540	A	H	A	H	3	S
gi|224000722|ref|XP_002290033.1|	predicted protein [Thalassiosira pseudonana CCMP1335]	SCD, desC	K00507	GO:0005783;GO:0004768;GO:0016717;GO:0044425;GO:0006629;GO:0055114;GO:0016021;GO:0006633;GO:0016491;GO:0044710	543	A	H	A	H	3	S
gi|224000722|ref|XP_002290033.1|	predicted protein [Thalassiosira pseudonana CCMP1335]	SCD, desC	K00507	GO:0005783;GO:0004768;GO:0016717;GO:0044425;GO:0006629;GO:0055114;GO:0016021;GO:0006633;GO:0016491;GO:0044710	549	A	K	A	K	3	S
gi|224000722|ref|XP_002290033.1|	predicted protein [Thalassiosira pseudonana CCMP1335]	SCD, desC	K00507	GO:0005783;GO:0004768;GO:0016717;GO:0044425;GO:0006629;GO:0055114;GO:0016021;GO:0006633;GO:0016491;GO:0044710	552	A	Y	A	Y	3	S
gi|224000722|ref|XP_002290033.1|	predicted protein [Thalassiosira pseudonana CCMP1335]	SCD, desC	K00507	GO:0005783;GO:0004768;GO:0016717;GO:0044425;GO:0006629;GO:0055114;GO:0016021;GO:0006633;GO:0016491;GO:0044710	555	C	P	C	P	3	S
gi|224000722|ref|XP_002290033.1|	predicted protein [Thalassiosira pseudonana CCMP1335]	SCD, desC	K00507	GO:0005783;GO:0004768;GO:0016717;GO:0044425;GO:0006629;GO:0055114;GO:0016021;GO:0006633;GO:0016491;GO:0044710	558	T	F	T	F	3	S
gi|224000722|ref|XP_002290033.1|	predicted protein [Thalassiosira pseudonana CCMP1335]	SCD, desC	K00507	GO:0005783;GO:0004768;GO:0016717;GO:0044425;GO:0006629;GO:0055114;GO:0016021;GO:0006633;GO:0016491;GO:0044710	660	C	T	C	T	3	S
gi|224000722|ref|XP_002290033.1|	predicted protein [Thalassiosira pseudonana CCMP1335]	SCD, desC	K00507	GO:0005783;GO:0004768;GO:0016717;GO:0044425;GO:0006629;GO:0055114;GO:0016021;GO:0006633;GO:0016491;GO:0044710	870	A	K	A	K	3	S
gi|219125179|ref|XP_002182864.1|	predicted protein [Phaeodactylum tricornutum CCAP 1055/1]	RTF1	K15178	GO:0008152;GO:0005488;GO:0044238;GO:0044260	2547	G	G	G	G	3	S
gi|219125179|ref|XP_002182864.1|	predicted protein [Phaeodactylum tricornutum CCAP 1055/1]	RTF1	K15178	GO:0008152;GO:0005488;GO:0044238;GO:0044260	2559	G	R	G	R	3	S
gi|219125179|ref|XP_002182864.1|	predicted protein [Phaeodactylum tricornutum CCAP 1055/1]	RTF1	K15178	GO:0008152;GO:0005488;GO:0044238;GO:0044260	2598	A	D	A	D	3	S
gi|219125179|ref|XP_002182864.1|	predicted protein [Phaeodactylum tricornutum CCAP 1055/1]	RTF1	K15178	GO:0008152;GO:0005488;GO:0044238;GO:0044260	2637	A	D	A	D	3	S
gi|219125179|ref|XP_002182864.1|	predicted protein [Phaeodactylum tricornutum CCAP 1055/1]	RTF1	K15178	GO:0008152;GO:0005488;GO:0044238;GO:0044260	2661	C	A	C	A	3	S
gi|219125179|ref|XP_002182864.1|	predicted protein [Phaeodactylum tricornutum CCAP 1055/1]	RTF1	K15178	GO:0008152;GO:0005488;GO:0044238;GO:0044260	2715	A	K	A	K	3	S
gi|219125179|ref|XP_002182864.1|	predicted protein [Phaeodactylum tricornutum CCAP 1055/1]	RTF1	K15178	GO:0008152;GO:0005488;GO:0044238;GO:0044260	3300	G	R	G	R	3	S
gi|219125179|ref|XP_002182864.1|	predicted protein [Phaeodactylum tricornutum CCAP 1055/1]	RTF1	K15178	GO:0008152;GO:0005488;GO:0044238;GO:0044260	3306	C	S	C	S	3	S
gi|219125179|ref|XP_002182864.1|	predicted protein [Phaeodactylum tricornutum CCAP 1055/1]	RTF1	K15178	GO:0008152;GO:0005488;GO:0044238;GO:0044260	3321	A	Q	A	Q	3	S
gi|219125179|ref|XP_002182864.1|	predicted protein [Phaeodactylum tricornutum CCAP 1055/1]	RTF1	K15178	GO:0008152;GO:0005488;GO:0044238;GO:0044260	3357	A	E	A	E	3	S
gi|219125179|ref|XP_002182864.1|	predicted protein [Phaeodactylum tricornutum CCAP 1055/1]	RTF1	K15178	GO:0008152;GO:0005488;GO:0044238;GO:0044260	3363	A	N	A	N	3	S
gi|219125179|ref|XP_002182864.1|	predicted protein [Phaeodactylum tricornutum CCAP 1055/1]	RTF1	K15178	GO:0008152;GO:0005488;GO:0044238;GO:0044260	3381	T	I	T	I	3	S
gi|219125179|ref|XP_002182864.1|	predicted protein [Phaeodactylum tricornutum CCAP 1055/1]	RTF1	K15178	GO:0008152;GO:0005488;GO:0044238;GO:0044260	3594	A	Q	A	Q	3	S
gi|219125179|ref|XP_002182864.1|	predicted protein [Phaeodactylum tricornutum CCAP 1055/1]	RTF1	K15178	GO:0008152;GO:0005488;GO:0044238;GO:0044260	4590	C	A	C	A	3	S
gi|219126866|ref|XP_002183669.1|	predicted protein [Phaeodactylum tricornutum CCAP 1055/1]	RSA4, NLE1	K14855	GO:0016740;GO:0005634	75	A	E	A	E	3	S
gi|219126866|ref|XP_002183669.1|	predicted protein [Phaeodactylum tricornutum CCAP 1055/1]	RSA4, NLE1	K14855	GO:0016740;GO:0005634	108	C	S	C	S	3	S
gi|219126866|ref|XP_002183669.1|	predicted protein [Phaeodactylum tricornutum CCAP 1055/1]	RSA4, NLE1	K14855	GO:0016740;GO:0005634	132	G	G	G	G	3	S
gi|219126866|ref|XP_002183669.1|	predicted protein [Phaeodactylum tricornutum CCAP 1055/1]	RSA4, NLE1	K14855	GO:0016740;GO:0005634	168	A	D	A	D	3	S
gi|219126866|ref|XP_002183669.1|	predicted protein [Phaeodactylum tricornutum CCAP 1055/1]	RSA4, NLE1	K14855	GO:0016740;GO:0005634	216	A	N	A	N	3	S
gi|219126866|ref|XP_002183669.1|	predicted protein [Phaeodactylum tricornutum CCAP 1055/1]	RSA4, NLE1	K14855	GO:0016740;GO:0005634	279	A	Q	A	Q	3	S
gi|219126866|ref|XP_002183669.1|	predicted protein [Phaeodactylum tricornutum CCAP 1055/1]	RSA4, NLE1	K14855	GO:0016740;GO:0005634	312	C	P	C	P	3	S
gi|219126866|ref|XP_002183669.1|	predicted protein [Phaeodactylum tricornutum CCAP 1055/1]	RSA4, NLE1	K14855	GO:0016740;GO:0005634	396	A	Q	A	Q	3	S
gi|219126866|ref|XP_002183669.1|	predicted protein [Phaeodactylum tricornutum CCAP 1055/1]	RSA4, NLE1	K14855	GO:0016740;GO:0005634	453	A	Y	A	Y	3	S
gi|219126866|ref|XP_002183669.1|	predicted protein [Phaeodactylum tricornutum CCAP 1055/1]	RSA4, NLE1	K14855	GO:0016740;GO:0005634	471	G	R	G	R	3	S
gi|219126866|ref|XP_002183669.1|	predicted protein [Phaeodactylum tricornutum CCAP 1055/1]	RSA4, NLE1	K14855	GO:0016740;GO:0005634	474	T	V	T	V	3	S
gi|219126866|ref|XP_002183669.1|	predicted protein [Phaeodactylum tricornutum CCAP 1055/1]	RSA4, NLE1	K14855	GO:0016740;GO:0005634	483	C	T	C	T	3	S
gi|219126866|ref|XP_002183669.1|	predicted protein [Phaeodactylum tricornutum CCAP 1055/1]	RSA4, NLE1	K14855	GO:0016740;GO:0005634	486	G	R	G	R	3	S
gi|219126866|ref|XP_002183669.1|	predicted protein [Phaeodactylum tricornutum CCAP 1055/1]	RSA4, NLE1	K14855	GO:0016740;GO:0005634	492	C	T	C	T	3	S
gi|219126866|ref|XP_002183669.1|	predicted protein [Phaeodactylum tricornutum CCAP 1055/1]	RSA4, NLE1	K14855	GO:0016740;GO:0005634	495	C	T	C	T	3	S
gi|219126866|ref|XP_002183669.1|	predicted protein [Phaeodactylum tricornutum CCAP 1055/1]	RSA4, NLE1	K14855	GO:0016740;GO:0005634	504	G	G	G	G	3	S
gi|219126866|ref|XP_002183669.1|	predicted protein [Phaeodactylum tricornutum CCAP 1055/1]	RSA4, NLE1	K14855	GO:0016740;GO:0005634	513	C	A	C	A	3	S
gi|219126866|ref|XP_002183669.1|	predicted protein [Phaeodactylum tricornutum CCAP 1055/1]	RSA4, NLE1	K14855	GO:0016740;GO:0005634	525	A	Q	A	Q	3	S
gi|219126866|ref|XP_002183669.1|	predicted protein [Phaeodactylum tricornutum CCAP 1055/1]	RSA4, NLE1	K14855	GO:0016740;GO:0005634	582	C	T	C	T	3	S
gi|219126866|ref|XP_002183669.1|	predicted protein [Phaeodactylum tricornutum CCAP 1055/1]	RSA4, NLE1	K14855	GO:0016740;GO:0005634	585	A	N	A	N	3	S
gi|219126866|ref|XP_002183669.1|	predicted protein [Phaeodactylum tricornutum CCAP 1055/1]	RSA4, NLE1	K14855	GO:0016740;GO:0005634	588	A	K	A	K	3	S
gi|219126866|ref|XP_002183669.1|	predicted protein [Phaeodactylum tricornutum CCAP 1055/1]	RSA4, NLE1	K14855	GO:0016740;GO:0005634	606	A	H	A	H	3	S
gi|219126866|ref|XP_002183669.1|	predicted protein [Phaeodactylum tricornutum CCAP 1055/1]	RSA4, NLE1	K14855	GO:0016740;GO:0005634	615	T	V	T	V	3	S
gi|219126866|ref|XP_002183669.1|	predicted protein [Phaeodactylum tricornutum CCAP 1055/1]	RSA4, NLE1	K14855	GO:0016740;GO:0005634	618	G	C	G	C	3	S
gi|219126866|ref|XP_002183669.1|	predicted protein [Phaeodactylum tricornutum CCAP 1055/1]	RSA4, NLE1	K14855	GO:0016740;GO:0005634	654	G	G	G	G	3	S
gi|219126866|ref|XP_002183669.1|	predicted protein [Phaeodactylum tricornutum CCAP 1055/1]	RSA4, NLE1	K14855	GO:0016740;GO:0005634	762	C	S	C	S	3	S
gi|219126866|ref|XP_002183669.1|	predicted protein [Phaeodactylum tricornutum CCAP 1055/1]	RSA4, NLE1	K14855	GO:0016740;GO:0005634	774	T	I	T	I	3	S
gi|219126866|ref|XP_002183669.1|	predicted protein [Phaeodactylum tricornutum CCAP 1055/1]	RSA4, NLE1	K14855	GO:0016740;GO:0005634	780	A	N	A	N	3	S
gi|219126866|ref|XP_002183669.1|	predicted protein [Phaeodactylum tricornutum CCAP 1055/1]	RSA4, NLE1	K14855	GO:0016740;GO:0005634	795	G	G	G	G	3	S
gi|219126866|ref|XP_002183669.1|	predicted protein [Phaeodactylum tricornutum CCAP 1055/1]	RSA4, NLE1	K14855	GO:0016740;GO:0005634	801	C	T	C	T	3	S
gi|219126866|ref|XP_002183669.1|	predicted protein [Phaeodactylum tricornutum CCAP 1055/1]	RSA4, NLE1	K14855	GO:0016740;GO:0005634	810	T	V	T	V	3	S
gi|219126866|ref|XP_002183669.1|	predicted protein [Phaeodactylum tricornutum CCAP 1055/1]	RSA4, NLE1	K14855	GO:0016740;GO:0005634	816	T	V	T	V	3	S
gi|219126866|ref|XP_002183669.1|	predicted protein [Phaeodactylum tricornutum CCAP 1055/1]	RSA4, NLE1	K14855	GO:0016740;GO:0005634	867	T	V	T	V	3	S
gi|219126866|ref|XP_002183669.1|	predicted protein [Phaeodactylum tricornutum CCAP 1055/1]	RSA4, NLE1	K14855	GO:0016740;GO:0005634	873	A	K	A	K	3	S
gi|219126866|ref|XP_002183669.1|	predicted protein [Phaeodactylum tricornutum CCAP 1055/1]	RSA4, NLE1	K14855	GO:0016740;GO:0005634	912	G	G	G	G	3	S
gi|219126866|ref|XP_002183669.1|	predicted protein [Phaeodactylum tricornutum CCAP 1055/1]	RSA4, NLE1	K14855	GO:0016740;GO:0005634	915	A	H	A	H	3	S
gi|219126866|ref|XP_002183669.1|	predicted protein [Phaeodactylum tricornutum CCAP 1055/1]	RSA4, NLE1	K14855	GO:0016740;GO:0005634	924	A	N	A	N	3	S
gi|219126866|ref|XP_002183669.1|	predicted protein [Phaeodactylum tricornutum CCAP 1055/1]	RSA4, NLE1	K14855	GO:0016740;GO:0005634	927	C	T	C	T	3	S
gi|219126866|ref|XP_002183669.1|	predicted protein [Phaeodactylum tricornutum CCAP 1055/1]	RSA4, NLE1	K14855	GO:0016740;GO:0005634	933	C	A	C	A	3	S
gi|219126866|ref|XP_002183669.1|	predicted protein [Phaeodactylum tricornutum CCAP 1055/1]	RSA4, NLE1	K14855	GO:0016740;GO:0005634	939	C	S	C	S	3	S
gi|219126866|ref|XP_002183669.1|	predicted protein [Phaeodactylum tricornutum CCAP 1055/1]	RSA4, NLE1	K14855	GO:0016740;GO:0005634	942	A	D	A	D	3	S
gi|219126866|ref|XP_002183669.1|	predicted protein [Phaeodactylum tricornutum CCAP 1055/1]	RSA4, NLE1	K14855	GO:0016740;GO:0005634	1038	T	L	T	L	3	S
gi|219126866|ref|XP_002183669.1|	predicted protein [Phaeodactylum tricornutum CCAP 1055/1]	RSA4, NLE1	K14855	GO:0016740;GO:0005634	1047	G	G	G	G	3	S
gi|219126866|ref|XP_002183669.1|	predicted protein [Phaeodactylum tricornutum CCAP 1055/1]	RSA4, NLE1	K14855	GO:0016740;GO:0005634	1056	C	T	C	T	3	S
gi|219126866|ref|XP_002183669.1|	predicted protein [Phaeodactylum tricornutum CCAP 1055/1]	RSA4, NLE1	K14855	GO:0016740;GO:0005634	1104	A	Q	A	Q	3	S
gi|219126866|ref|XP_002183669.1|	predicted protein [Phaeodactylum tricornutum CCAP 1055/1]	RSA4, NLE1	K14855	GO:0016740;GO:0005634	1143	G	G	G	G	3	S
gi|219126866|ref|XP_002183669.1|	predicted protein [Phaeodactylum tricornutum CCAP 1055/1]	RSA4, NLE1	K14855	GO:0016740;GO:0005634	1161	T	F	T	F	3	S
gi|219126866|ref|XP_002183669.1|	predicted protein [Phaeodactylum tricornutum CCAP 1055/1]	RSA4, NLE1	K14855	GO:0016740;GO:0005634	1209	C	S	C	S	3	S
gi|219126866|ref|XP_002183669.1|	predicted protein [Phaeodactylum tricornutum CCAP 1055/1]	RSA4, NLE1	K14855	GO:0016740;GO:0005634	1293	G	G	G	G	3	S
gi|219126866|ref|XP_002183669.1|	predicted protein [Phaeodactylum tricornutum CCAP 1055/1]	RSA4, NLE1	K14855	GO:0016740;GO:0005634	1311	T	I	T	I	3	S
gi|219126866|ref|XP_002183669.1|	predicted protein [Phaeodactylum tricornutum CCAP 1055/1]	RSA4, NLE1	K14855	GO:0016740;GO:0005634	1323	G	G	G	G	3	S
gi|397624111|gb|EJK67273.1|	hypothetical protein THAOC_11720, partial [Thalassiosira oceanica]	RRS1	K14852	_	1401	G	G	G	G	3	S
gi|219111541|ref|XP_002177522.1|	predicted protein [Phaeodactylum tricornutum CCAP 1055/1]	RRP9	K14793	_	258	A	K	A	K	3	S
gi|118358862|ref|XP_001012672.1|	hypothetical protein TTHERM_00085250 [Tetrahymena thermophila]	RRP8	K14850	GO:0008168;GO:0032259	612	G	G	G	G	3	S
gi|397620972|gb|EJK66030.1|	hypothetical protein THAOC_13070 [Thalassiosira oceanica]	RRP5, PDCD11	K14792	GO:0005622;GO:0006396	189	G	G	G	G	3	S
gi|397620972|gb|EJK66030.1|	hypothetical protein THAOC_13070 [Thalassiosira oceanica]	RRP5, PDCD11	K14792	GO:0005622;GO:0006396	4719	A	Q	A	Q	3	S
gi|397620972|gb|EJK66030.1|	hypothetical protein THAOC_13070 [Thalassiosira oceanica]	RRP5, PDCD11	K14792	GO:0005622;GO:0006396	4725	G	C	G	C	3	S
gi|219129572|ref|XP_002184959.1|	predicted protein [Phaeodactylum tricornutum CCAP 1055/1]	RRP45, EXOSC9	K03678	GO:0031981;GO:0006401	60	T	F	T	F	3	S
gi|219129572|ref|XP_002184959.1|	predicted protein [Phaeodactylum tricornutum CCAP 1055/1]	RRP45, EXOSC9	K03678	GO:0031981;GO:0006401	234	T	I	T	I	3	S
gi|219129572|ref|XP_002184959.1|	predicted protein [Phaeodactylum tricornutum CCAP 1055/1]	RRP45, EXOSC9	K03678	GO:0031981;GO:0006401	246	T	V	T	V	3	S
gi|219129572|ref|XP_002184959.1|	predicted protein [Phaeodactylum tricornutum CCAP 1055/1]	RRP45, EXOSC9	K03678	GO:0031981;GO:0006401	282	C	T	C	T	3	S
gi|219129572|ref|XP_002184959.1|	predicted protein [Phaeodactylum tricornutum CCAP 1055/1]	RRP45, EXOSC9	K03678	GO:0031981;GO:0006401	297	A	N	A	N	3	S
gi|219129572|ref|XP_002184959.1|	predicted protein [Phaeodactylum tricornutum CCAP 1055/1]	RRP45, EXOSC9	K03678	GO:0031981;GO:0006401	360	A	N	A	N	3	S
gi|219129572|ref|XP_002184959.1|	predicted protein [Phaeodactylum tricornutum CCAP 1055/1]	RRP45, EXOSC9	K03678	GO:0031981;GO:0006401	384	G	G	G	G	3	S
gi|219129572|ref|XP_002184959.1|	predicted protein [Phaeodactylum tricornutum CCAP 1055/1]	RRP45, EXOSC9	K03678	GO:0031981;GO:0006401	390	A	E	A	E	3	S
gi|219129572|ref|XP_002184959.1|	predicted protein [Phaeodactylum tricornutum CCAP 1055/1]	RRP45, EXOSC9	K03678	GO:0031981;GO:0006401	432	G	G	G	G	3	S
gi|219129572|ref|XP_002184959.1|	predicted protein [Phaeodactylum tricornutum CCAP 1055/1]	RRP45, EXOSC9	K03678	GO:0031981;GO:0006401	462	G	R	G	R	3	S
gi|219129572|ref|XP_002184959.1|	predicted protein [Phaeodactylum tricornutum CCAP 1055/1]	RRP45, EXOSC9	K03678	GO:0031981;GO:0006401	468	T	V	T	V	3	S
gi|219129572|ref|XP_002184959.1|	predicted protein [Phaeodactylum tricornutum CCAP 1055/1]	RRP45, EXOSC9	K03678	GO:0031981;GO:0006401	525	C	T	C	T	3	S
gi|219129572|ref|XP_002184959.1|	predicted protein [Phaeodactylum tricornutum CCAP 1055/1]	RRP45, EXOSC9	K03678	GO:0031981;GO:0006401	663	G	S	G	S	3	S
gi|219129572|ref|XP_002184959.1|	predicted protein [Phaeodactylum tricornutum CCAP 1055/1]	RRP45, EXOSC9	K03678	GO:0031981;GO:0006401	795	G	C	G	C	3	S
gi|219129572|ref|XP_002184959.1|	predicted protein [Phaeodactylum tricornutum CCAP 1055/1]	RRP45, EXOSC9	K03678	GO:0031981;GO:0006401	879	T	V	T	V	3	S
gi|219129572|ref|XP_002184959.1|	predicted protein [Phaeodactylum tricornutum CCAP 1055/1]	RRP45, EXOSC9	K03678	GO:0031981;GO:0006401	885	A	K	A	K	3	S
gi|219129572|ref|XP_002184959.1|	predicted protein [Phaeodactylum tricornutum CCAP 1055/1]	RRP45, EXOSC9	K03678	GO:0031981;GO:0006401	909	A	K	A	K	3	S
gi|219129572|ref|XP_002184959.1|	predicted protein [Phaeodactylum tricornutum CCAP 1055/1]	RRP45, EXOSC9	K03678	GO:0031981;GO:0006401	921	T	V	T	V	3	S
gi|219129572|ref|XP_002184959.1|	predicted protein [Phaeodactylum tricornutum CCAP 1055/1]	RRP45, EXOSC9	K03678	GO:0031981;GO:0006401	927	T	F	T	F	3	S
gi|219129572|ref|XP_002184959.1|	predicted protein [Phaeodactylum tricornutum CCAP 1055/1]	RRP45, EXOSC9	K03678	GO:0031981;GO:0006401	984	C	T	C	T	3	S
gi|219129572|ref|XP_002184959.1|	predicted protein [Phaeodactylum tricornutum CCAP 1055/1]	RRP45, EXOSC9	K03678	GO:0031981;GO:0006401	987	C	T	C	T	3	S
gi|219129572|ref|XP_002184959.1|	predicted protein [Phaeodactylum tricornutum CCAP 1055/1]	RRP45, EXOSC9	K03678	GO:0031981;GO:0006401	1095	A	K	A	K	3	S
gi|219129572|ref|XP_002184959.1|	predicted protein [Phaeodactylum tricornutum CCAP 1055/1]	RRP45, EXOSC9	K03678	GO:0031981;GO:0006401	1101	C	S	C	S	3	S
gi|219127863|ref|XP_002184146.1|	predicted protein [Phaeodactylum tricornutum CCAP 1055/1]	RRP41, EXOSC4, SKI6	K11600	GO:0005737;GO:0005515;GO:0000460;GO:0045006;GO:0017091;GO:0030307;GO:0071028;GO:0071044;GO:0051252;GO:0005634;GO:0051607;GO:0035327;GO:0000288;GO:0004532;GO:0000178	555	G	R	G	R	3	S
gi|219114437|ref|XP_002176389.1|	predicted protein [Phaeodactylum tricornutum CCAP 1055/1]	RRP4, EXOSC2	K03679	GO:0003723;GO:0000178	81	C	S	C	S	3	S
gi|219114437|ref|XP_002176389.1|	predicted protein [Phaeodactylum tricornutum CCAP 1055/1]	RRP4, EXOSC2	K03679	GO:0003723;GO:0000178	117	C	S	C	S	3	S
gi|219114437|ref|XP_002176389.1|	predicted protein [Phaeodactylum tricornutum CCAP 1055/1]	RRP4, EXOSC2	K03679	GO:0003723;GO:0000178	141	T	V	T	V	3	S
gi|219114437|ref|XP_002176389.1|	predicted protein [Phaeodactylum tricornutum CCAP 1055/1]	RRP4, EXOSC2	K03679	GO:0003723;GO:0000178	162	C	T	C	T	3	S
gi|219114437|ref|XP_002176389.1|	predicted protein [Phaeodactylum tricornutum CCAP 1055/1]	RRP4, EXOSC2	K03679	GO:0003723;GO:0000178	174	A	Q	A	Q	3	S
gi|219114437|ref|XP_002176389.1|	predicted protein [Phaeodactylum tricornutum CCAP 1055/1]	RRP4, EXOSC2	K03679	GO:0003723;GO:0000178	189	G	G	G	G	3	S
gi|219114437|ref|XP_002176389.1|	predicted protein [Phaeodactylum tricornutum CCAP 1055/1]	RRP4, EXOSC2	K03679	GO:0003723;GO:0000178	312	C	T	C	T	3	S
gi|219114437|ref|XP_002176389.1|	predicted protein [Phaeodactylum tricornutum CCAP 1055/1]	RRP4, EXOSC2	K03679	GO:0003723;GO:0000178	474	G	S	G	S	3	S
gi|219114437|ref|XP_002176389.1|	predicted protein [Phaeodactylum tricornutum CCAP 1055/1]	RRP4, EXOSC2	K03679	GO:0003723;GO:0000178	531	C	S	C	S	3	S
gi|219114437|ref|XP_002176389.1|	predicted protein [Phaeodactylum tricornutum CCAP 1055/1]	RRP4, EXOSC2	K03679	GO:0003723;GO:0000178	543	A	D	A	D	3	S
gi|219114437|ref|XP_002176389.1|	predicted protein [Phaeodactylum tricornutum CCAP 1055/1]	RRP4, EXOSC2	K03679	GO:0003723;GO:0000178	570	A	Y	A	Y	3	S
gi|219114437|ref|XP_002176389.1|	predicted protein [Phaeodactylum tricornutum CCAP 1055/1]	RRP4, EXOSC2	K03679	GO:0003723;GO:0000178	612	A	K	A	K	3	S
gi|219114437|ref|XP_002176389.1|	predicted protein [Phaeodactylum tricornutum CCAP 1055/1]	RRP4, EXOSC2	K03679	GO:0003723;GO:0000178	624	A	K	A	K	3	S
gi|219114437|ref|XP_002176389.1|	predicted protein [Phaeodactylum tricornutum CCAP 1055/1]	RRP4, EXOSC2	K03679	GO:0003723;GO:0000178	642	C	T	C	T	3	S
gi|219114437|ref|XP_002176389.1|	predicted protein [Phaeodactylum tricornutum CCAP 1055/1]	RRP4, EXOSC2	K03679	GO:0003723;GO:0000178	663	T	I	T	I	3	S
gi|219114437|ref|XP_002176389.1|	predicted protein [Phaeodactylum tricornutum CCAP 1055/1]	RRP4, EXOSC2	K03679	GO:0003723;GO:0000178	669	G	R	G	R	3	S
gi|219114437|ref|XP_002176389.1|	predicted protein [Phaeodactylum tricornutum CCAP 1055/1]	RRP4, EXOSC2	K03679	GO:0003723;GO:0000178	678	A	N	A	N	3	S
gi|219114437|ref|XP_002176389.1|	predicted protein [Phaeodactylum tricornutum CCAP 1055/1]	RRP4, EXOSC2	K03679	GO:0003723;GO:0000178	681	C	A	C	A	3	S
gi|219114437|ref|XP_002176389.1|	predicted protein [Phaeodactylum tricornutum CCAP 1055/1]	RRP4, EXOSC2	K03679	GO:0003723;GO:0000178	747	C	A	C	A	3	S
gi|219114437|ref|XP_002176389.1|	predicted protein [Phaeodactylum tricornutum CCAP 1055/1]	RRP4, EXOSC2	K03679	GO:0003723;GO:0000178	762	T	I	T	I	3	S
gi|219114437|ref|XP_002176389.1|	predicted protein [Phaeodactylum tricornutum CCAP 1055/1]	RRP4, EXOSC2	K03679	GO:0003723;GO:0000178	795	C	T	C	T	3	S
gi|223992775|ref|XP_002286071.1|	WD repeat protein [Thalassiosira pseudonana CCMP1335]	RRB1, GRWD1	K14848	_	558	A	D	A	D	3	S
gi|223992775|ref|XP_002286071.1|	WD repeat protein [Thalassiosira pseudonana CCMP1335]	RRB1, GRWD1	K14848	_	588	C	S	C	S	3	S
gi|223992775|ref|XP_002286071.1|	WD repeat protein [Thalassiosira pseudonana CCMP1335]	RRB1, GRWD1	K14848	_	591	C	S	C	S	3	S
gi|223992775|ref|XP_002286071.1|	WD repeat protein [Thalassiosira pseudonana CCMP1335]	RRB1, GRWD1	K14848	_	636	T	I	T	I	3	S
gi|223992775|ref|XP_002286071.1|	WD repeat protein [Thalassiosira pseudonana CCMP1335]	RRB1, GRWD1	K14848	_	867	C	S	C	S	3	S
gi|223992775|ref|XP_002286071.1|	WD repeat protein [Thalassiosira pseudonana CCMP1335]	RRB1, GRWD1	K14848	_	903	C	S	C	S	3	S
gi|223992775|ref|XP_002286071.1|	WD repeat protein [Thalassiosira pseudonana CCMP1335]	RRB1, GRWD1	K14848	_	933	G	G	G	G	3	S
gi|219109816|ref|XP_002176661.1|	predicted protein [Phaeodactylum tricornutum CCAP 1055/1]	RP-S8e, RPS8	K02995	GO:0003735;GO:0006412;GO:0005840;GO:0042254	453	A	K	A	K	3	S
gi|219124101|ref|XP_002182350.1|	predicted protein [Phaeodactylum tricornutum CCAP 1055/1]	RP-S5e, RPS5	K02989	GO:0015935;GO:0003735;GO:0006412;GO:0003723;GO:0042254	90	C	S	C	S	3	S
gi|219124101|ref|XP_002182350.1|	predicted protein [Phaeodactylum tricornutum CCAP 1055/1]	RP-S5e, RPS5	K02989	GO:0015935;GO:0003735;GO:0006412;GO:0003723;GO:0042254	489	T	I	T	I	3	S
gi|223996813|ref|XP_002288080.1|	RS4, ribosomal protein 4 [Thalassiosira pseudonana CCMP1335]	RP-S4e, RPS4	K02987	GO:0016020;GO:0015935;GO:0003735;GO:0006412;GO:0009536;GO:0005840;GO:0003723;GO:0044446;GO:0042254;GO:0019843	135	C	T	C	T	3	S
gi|223996813|ref|XP_002288080.1|	RS4, ribosomal protein 4 [Thalassiosira pseudonana CCMP1335]	RP-S4e, RPS4	K02987	GO:0016020;GO:0015935;GO:0003735;GO:0006412;GO:0009536;GO:0005840;GO:0003723;GO:0044446;GO:0042254;GO:0019843	216	T	V	T	V	3	S
gi|223996813|ref|XP_002288080.1|	RS4, ribosomal protein 4 [Thalassiosira pseudonana CCMP1335]	RP-S4e, RPS4	K02987	GO:0016020;GO:0015935;GO:0003735;GO:0006412;GO:0009536;GO:0005840;GO:0003723;GO:0044446;GO:0042254;GO:0019843	249	C	P	C	P	3	S
gi|223996813|ref|XP_002288080.1|	RS4, ribosomal protein 4 [Thalassiosira pseudonana CCMP1335]	RP-S4e, RPS4	K02987	GO:0016020;GO:0015935;GO:0003735;GO:0006412;GO:0009536;GO:0005840;GO:0003723;GO:0044446;GO:0042254;GO:0019843	456	C	P	C	P	3	S
gi|219125370|ref|XP_002182956.1|	predicted protein [Phaeodactylum tricornutum CCAP 1055/1]	RP-S2e, RPS2	K02981	GO:0016020;GO:0071944;GO:0015935;GO:0003735;GO:0006412;GO:0022626;GO:0003723;GO:0042254;GO:0043231	117	T	I	T	I	3	S
gi|219125370|ref|XP_002182956.1|	predicted protein [Phaeodactylum tricornutum CCAP 1055/1]	RP-S2e, RPS2	K02981	GO:0016020;GO:0071944;GO:0015935;GO:0003735;GO:0006412;GO:0022626;GO:0003723;GO:0042254;GO:0043231	195	G	R	G	R	3	S
gi|219125370|ref|XP_002182956.1|	predicted protein [Phaeodactylum tricornutum CCAP 1055/1]	RP-S2e, RPS2	K02981	GO:0016020;GO:0071944;GO:0015935;GO:0003735;GO:0006412;GO:0022626;GO:0003723;GO:0042254;GO:0043231	639	C	S	C	S	3	S
gi|219125370|ref|XP_002182956.1|	predicted protein [Phaeodactylum tricornutum CCAP 1055/1]	RP-S2e, RPS2	K02981	GO:0016020;GO:0071944;GO:0015935;GO:0003735;GO:0006412;GO:0022626;GO:0003723;GO:0042254;GO:0043231	660	G	S	G	S	3	S
gi|219125370|ref|XP_002182956.1|	predicted protein [Phaeodactylum tricornutum CCAP 1055/1]	RP-S2e, RPS2	K02981	GO:0016020;GO:0071944;GO:0015935;GO:0003735;GO:0006412;GO:0022626;GO:0003723;GO:0042254;GO:0043231	678	A	K	A	K	3	S
gi|219125370|ref|XP_002182956.1|	predicted protein [Phaeodactylum tricornutum CCAP 1055/1]	RP-S2e, RPS2	K02981	GO:0016020;GO:0071944;GO:0015935;GO:0003735;GO:0006412;GO:0022626;GO:0003723;GO:0042254;GO:0043231	684	A	Q	A	Q	3	S
gi|219122014|ref|XP_002181350.1|	predicted protein [Phaeodactylum tricornutum CCAP 1055/1]	RP-S24e, RPS24	K02974	GO:0003735;GO:0034101;GO:0000462;GO:0000184;GO:0031369;GO:0006413;GO:0006614;GO:0006412;GO:0005840;GO:0006414;GO:0042254;GO:0005730;GO:0000166;GO:0006415;GO:0019083;GO:0022627	21	T	V	T	V	3	S
gi|219122014|ref|XP_002181350.1|	predicted protein [Phaeodactylum tricornutum CCAP 1055/1]	RP-S24e, RPS24	K02974	GO:0003735;GO:0034101;GO:0000462;GO:0000184;GO:0031369;GO:0006413;GO:0006614;GO:0006412;GO:0005840;GO:0006414;GO:0042254;GO:0005730;GO:0000166;GO:0006415;GO:0019083;GO:0022627	30	C	T	C	T	3	S
gi|219122014|ref|XP_002181350.1|	predicted protein [Phaeodactylum tricornutum CCAP 1055/1]	RP-S24e, RPS24	K02974	GO:0003735;GO:0034101;GO:0000462;GO:0000184;GO:0031369;GO:0006413;GO:0006614;GO:0006412;GO:0005840;GO:0006414;GO:0042254;GO:0005730;GO:0000166;GO:0006415;GO:0019083;GO:0022627	33	A	K	A	K	3	S
gi|219122014|ref|XP_002181350.1|	predicted protein [Phaeodactylum tricornutum CCAP 1055/1]	RP-S24e, RPS24	K02974	GO:0003735;GO:0034101;GO:0000462;GO:0000184;GO:0031369;GO:0006413;GO:0006614;GO:0006412;GO:0005840;GO:0006414;GO:0042254;GO:0005730;GO:0000166;GO:0006415;GO:0019083;GO:0022627	42	A	N	A	N	3	S
gi|219122014|ref|XP_002181350.1|	predicted protein [Phaeodactylum tricornutum CCAP 1055/1]	RP-S24e, RPS24	K02974	GO:0003735;GO:0034101;GO:0000462;GO:0000184;GO:0031369;GO:0006413;GO:0006614;GO:0006412;GO:0005840;GO:0006414;GO:0042254;GO:0005730;GO:0000166;GO:0006415;GO:0019083;GO:0022627	45	T	L	T	L	3	S
gi|219122014|ref|XP_002181350.1|	predicted protein [Phaeodactylum tricornutum CCAP 1055/1]	RP-S24e, RPS24	K02974	GO:0003735;GO:0034101;GO:0000462;GO:0000184;GO:0031369;GO:0006413;GO:0006614;GO:0006412;GO:0005840;GO:0006414;GO:0042254;GO:0005730;GO:0000166;GO:0006415;GO:0019083;GO:0022627	51	A	K	A	K	3	S
gi|219122014|ref|XP_002181350.1|	predicted protein [Phaeodactylum tricornutum CCAP 1055/1]	RP-S24e, RPS24	K02974	GO:0003735;GO:0034101;GO:0000462;GO:0000184;GO:0031369;GO:0006413;GO:0006614;GO:0006412;GO:0005840;GO:0006414;GO:0042254;GO:0005730;GO:0000166;GO:0006415;GO:0019083;GO:0022627	54	A	Q	A	Q	3	S
gi|219122014|ref|XP_002181350.1|	predicted protein [Phaeodactylum tricornutum CCAP 1055/1]	RP-S24e, RPS24	K02974	GO:0003735;GO:0034101;GO:0000462;GO:0000184;GO:0031369;GO:0006413;GO:0006614;GO:0006412;GO:0005840;GO:0006414;GO:0042254;GO:0005730;GO:0000166;GO:0006415;GO:0019083;GO:0022627	63	A	D	A	D	3	S
gi|219122014|ref|XP_002181350.1|	predicted protein [Phaeodactylum tricornutum CCAP 1055/1]	RP-S24e, RPS24	K02974	GO:0003735;GO:0034101;GO:0000462;GO:0000184;GO:0031369;GO:0006413;GO:0006614;GO:0006412;GO:0005840;GO:0006414;GO:0042254;GO:0005730;GO:0000166;GO:0006415;GO:0019083;GO:0022627	72	A	H	A	H	3	S
gi|219122014|ref|XP_002181350.1|	predicted protein [Phaeodactylum tricornutum CCAP 1055/1]	RP-S24e, RPS24	K02974	GO:0003735;GO:0034101;GO:0000462;GO:0000184;GO:0031369;GO:0006413;GO:0006614;GO:0006412;GO:0005840;GO:0006414;GO:0042254;GO:0005730;GO:0000166;GO:0006415;GO:0019083;GO:0022627	75	C	P	C	P	3	S
gi|219122014|ref|XP_002181350.1|	predicted protein [Phaeodactylum tricornutum CCAP 1055/1]	RP-S24e, RPS24	K02974	GO:0003735;GO:0034101;GO:0000462;GO:0000184;GO:0031369;GO:0006413;GO:0006614;GO:0006412;GO:0005840;GO:0006414;GO:0042254;GO:0005730;GO:0000166;GO:0006415;GO:0019083;GO:0022627	78	G	G	G	G	3	S
gi|219122014|ref|XP_002181350.1|	predicted protein [Phaeodactylum tricornutum CCAP 1055/1]	RP-S24e, RPS24	K02974	GO:0003735;GO:0034101;GO:0000462;GO:0000184;GO:0031369;GO:0006413;GO:0006614;GO:0006412;GO:0005840;GO:0006414;GO:0042254;GO:0005730;GO:0000166;GO:0006415;GO:0019083;GO:0022627	81	C	A	C	A	3	S
gi|219122014|ref|XP_002181350.1|	predicted protein [Phaeodactylum tricornutum CCAP 1055/1]	RP-S24e, RPS24	K02974	GO:0003735;GO:0034101;GO:0000462;GO:0000184;GO:0031369;GO:0006413;GO:0006614;GO:0006412;GO:0005840;GO:0006414;GO:0042254;GO:0005730;GO:0000166;GO:0006415;GO:0019083;GO:0022627	84	T	V	T	V	3	S
gi|219122014|ref|XP_002181350.1|	predicted protein [Phaeodactylum tricornutum CCAP 1055/1]	RP-S24e, RPS24	K02974	GO:0003735;GO:0034101;GO:0000462;GO:0000184;GO:0031369;GO:0006413;GO:0006614;GO:0006412;GO:0005840;GO:0006414;GO:0042254;GO:0005730;GO:0000166;GO:0006415;GO:0019083;GO:0022627	93	A	E	A	E	3	S
gi|219122014|ref|XP_002181350.1|	predicted protein [Phaeodactylum tricornutum CCAP 1055/1]	RP-S24e, RPS24	K02974	GO:0003735;GO:0034101;GO:0000462;GO:0000184;GO:0031369;GO:0006413;GO:0006614;GO:0006412;GO:0005840;GO:0006414;GO:0042254;GO:0005730;GO:0000166;GO:0006415;GO:0019083;GO:0022627	99	T	L	T	L	3	S
gi|219122014|ref|XP_002181350.1|	predicted protein [Phaeodactylum tricornutum CCAP 1055/1]	RP-S24e, RPS24	K02974	GO:0003735;GO:0034101;GO:0000462;GO:0000184;GO:0031369;GO:0006413;GO:0006614;GO:0006412;GO:0005840;GO:0006414;GO:0042254;GO:0005730;GO:0000166;GO:0006415;GO:0019083;GO:0022627	102	C	A	C	A	3	S
gi|219122014|ref|XP_002181350.1|	predicted protein [Phaeodactylum tricornutum CCAP 1055/1]	RP-S24e, RPS24	K02974	GO:0003735;GO:0034101;GO:0000462;GO:0000184;GO:0031369;GO:0006413;GO:0006614;GO:0006412;GO:0005840;GO:0006414;GO:0042254;GO:0005730;GO:0000166;GO:0006415;GO:0019083;GO:0022627	123	G	G	G	G	3	S
gi|219122014|ref|XP_002181350.1|	predicted protein [Phaeodactylum tricornutum CCAP 1055/1]	RP-S24e, RPS24	K02974	GO:0003735;GO:0034101;GO:0000462;GO:0000184;GO:0031369;GO:0006413;GO:0006614;GO:0006412;GO:0005840;GO:0006414;GO:0042254;GO:0005730;GO:0000166;GO:0006415;GO:0019083;GO:0022627	132	C	T	C	T	3	S
gi|219122014|ref|XP_002181350.1|	predicted protein [Phaeodactylum tricornutum CCAP 1055/1]	RP-S24e, RPS24	K02974	GO:0003735;GO:0034101;GO:0000462;GO:0000184;GO:0031369;GO:0006413;GO:0006614;GO:0006412;GO:0005840;GO:0006414;GO:0042254;GO:0005730;GO:0000166;GO:0006415;GO:0019083;GO:0022627	147	G	G	G	G	3	S
gi|219122014|ref|XP_002181350.1|	predicted protein [Phaeodactylum tricornutum CCAP 1055/1]	RP-S24e, RPS24	K02974	GO:0003735;GO:0034101;GO:0000462;GO:0000184;GO:0031369;GO:0006413;GO:0006614;GO:0006412;GO:0005840;GO:0006414;GO:0042254;GO:0005730;GO:0000166;GO:0006415;GO:0019083;GO:0022627	156	G	G	G	G	3	S
gi|219122014|ref|XP_002181350.1|	predicted protein [Phaeodactylum tricornutum CCAP 1055/1]	RP-S24e, RPS24	K02974	GO:0003735;GO:0034101;GO:0000462;GO:0000184;GO:0031369;GO:0006413;GO:0006614;GO:0006412;GO:0005840;GO:0006414;GO:0042254;GO:0005730;GO:0000166;GO:0006415;GO:0019083;GO:0022627	159	T	F	T	F	3	S
gi|219122014|ref|XP_002181350.1|	predicted protein [Phaeodactylum tricornutum CCAP 1055/1]	RP-S24e, RPS24	K02974	GO:0003735;GO:0034101;GO:0000462;GO:0000184;GO:0031369;GO:0006413;GO:0006614;GO:0006412;GO:0005840;GO:0006414;GO:0042254;GO:0005730;GO:0000166;GO:0006415;GO:0019083;GO:0022627	168	A	Y	A	Y	3	S
gi|219122014|ref|XP_002181350.1|	predicted protein [Phaeodactylum tricornutum CCAP 1055/1]	RP-S24e, RPS24	K02974	GO:0003735;GO:0034101;GO:0000462;GO:0000184;GO:0031369;GO:0006413;GO:0006614;GO:0006412;GO:0005840;GO:0006414;GO:0042254;GO:0005730;GO:0000166;GO:0006415;GO:0019083;GO:0022627	171	A	D	A	D	3	S
gi|219122014|ref|XP_002181350.1|	predicted protein [Phaeodactylum tricornutum CCAP 1055/1]	RP-S24e, RPS24	K02974	GO:0003735;GO:0034101;GO:0000462;GO:0000184;GO:0031369;GO:0006413;GO:0006614;GO:0006412;GO:0005840;GO:0006414;GO:0042254;GO:0005730;GO:0000166;GO:0006415;GO:0019083;GO:0022627	189	A	E	A	E	3	S
gi|219122014|ref|XP_002181350.1|	predicted protein [Phaeodactylum tricornutum CCAP 1055/1]	RP-S24e, RPS24	K02974	GO:0003735;GO:0034101;GO:0000462;GO:0000184;GO:0031369;GO:0006413;GO:0006614;GO:0006412;GO:0005840;GO:0006414;GO:0042254;GO:0005730;GO:0000166;GO:0006415;GO:0019083;GO:0022627	192	C	P	C	P	3	S
gi|219122014|ref|XP_002181350.1|	predicted protein [Phaeodactylum tricornutum CCAP 1055/1]	RP-S24e, RPS24	K02974	GO:0003735;GO:0034101;GO:0000462;GO:0000184;GO:0031369;GO:0006413;GO:0006614;GO:0006412;GO:0005840;GO:0006414;GO:0042254;GO:0005730;GO:0000166;GO:0006415;GO:0019083;GO:0022627	198	A	H	A	H	3	S
gi|219122014|ref|XP_002181350.1|	predicted protein [Phaeodactylum tricornutum CCAP 1055/1]	RP-S24e, RPS24	K02974	GO:0003735;GO:0034101;GO:0000462;GO:0000184;GO:0031369;GO:0006413;GO:0006614;GO:0006412;GO:0005840;GO:0006414;GO:0042254;GO:0005730;GO:0000166;GO:0006415;GO:0019083;GO:0022627	210	G	G	G	G	3	S
gi|219122014|ref|XP_002181350.1|	predicted protein [Phaeodactylum tricornutum CCAP 1055/1]	RP-S24e, RPS24	K02974	GO:0003735;GO:0034101;GO:0000462;GO:0000184;GO:0031369;GO:0006413;GO:0006614;GO:0006412;GO:0005840;GO:0006414;GO:0042254;GO:0005730;GO:0000166;GO:0006415;GO:0019083;GO:0022627	219	A	K	A	K	3	S
gi|219122014|ref|XP_002181350.1|	predicted protein [Phaeodactylum tricornutum CCAP 1055/1]	RP-S24e, RPS24	K02974	GO:0003735;GO:0034101;GO:0000462;GO:0000184;GO:0031369;GO:0006413;GO:0006614;GO:0006412;GO:0005840;GO:0006414;GO:0042254;GO:0005730;GO:0000166;GO:0006415;GO:0019083;GO:0022627	222	A	K	A	K	3	S
gi|219122014|ref|XP_002181350.1|	predicted protein [Phaeodactylum tricornutum CCAP 1055/1]	RP-S24e, RPS24	K02974	GO:0003735;GO:0034101;GO:0000462;GO:0000184;GO:0031369;GO:0006413;GO:0006614;GO:0006412;GO:0005840;GO:0006414;GO:0042254;GO:0005730;GO:0000166;GO:0006415;GO:0019083;GO:0022627	258	C	S	C	S	3	S
gi|223994887|ref|XP_002287127.1|	RS18, ribosomal protein 18 40S small ribosomal subunit [Thalassiosira pseudonana CCMP1335]	RP-S18e, RPS18	K02964	GO:0005515;GO:0003735;GO:0006412;GO:0003723;GO:0042254;GO:0005730;GO:0005886;GO:0019843;GO:0009507;GO:0005773;GO:0005618;GO:0022627	93	C	P	C	P	3	S
gi|223994887|ref|XP_002287127.1|	RS18, ribosomal protein 18 40S small ribosomal subunit [Thalassiosira pseudonana CCMP1335]	RP-S18e, RPS18	K02964	GO:0005515;GO:0003735;GO:0006412;GO:0003723;GO:0042254;GO:0005730;GO:0005886;GO:0019843;GO:0009507;GO:0005773;GO:0005618;GO:0022627	123	A	H	A	H	3	S
gi|223994887|ref|XP_002287127.1|	RS18, ribosomal protein 18 40S small ribosomal subunit [Thalassiosira pseudonana CCMP1335]	RP-S18e, RPS18	K02964	GO:0005515;GO:0003735;GO:0006412;GO:0003723;GO:0042254;GO:0005730;GO:0005886;GO:0019843;GO:0009507;GO:0005773;GO:0005618;GO:0022627	132	G	R	G	R	3	S
gi|223994887|ref|XP_002287127.1|	RS18, ribosomal protein 18 40S small ribosomal subunit [Thalassiosira pseudonana CCMP1335]	RP-S18e, RPS18	K02964	GO:0005515;GO:0003735;GO:0006412;GO:0003723;GO:0042254;GO:0005730;GO:0005886;GO:0019843;GO:0009507;GO:0005773;GO:0005618;GO:0022627	135	T	V	T	V	3	S
gi|223994887|ref|XP_002287127.1|	RS18, ribosomal protein 18 40S small ribosomal subunit [Thalassiosira pseudonana CCMP1335]	RP-S18e, RPS18	K02964	GO:0005515;GO:0003735;GO:0006412;GO:0003723;GO:0042254;GO:0005730;GO:0005886;GO:0019843;GO:0009507;GO:0005773;GO:0005618;GO:0022627	153	G	G	G	G	3	S
gi|223994887|ref|XP_002287127.1|	RS18, ribosomal protein 18 40S small ribosomal subunit [Thalassiosira pseudonana CCMP1335]	RP-S18e, RPS18	K02964	GO:0005515;GO:0003735;GO:0006412;GO:0003723;GO:0042254;GO:0005730;GO:0005886;GO:0019843;GO:0009507;GO:0005773;GO:0005618;GO:0022627	159	A	K	A	K	3	S
gi|223994887|ref|XP_002287127.1|	RS18, ribosomal protein 18 40S small ribosomal subunit [Thalassiosira pseudonana CCMP1335]	RP-S18e, RPS18	K02964	GO:0005515;GO:0003735;GO:0006412;GO:0003723;GO:0042254;GO:0005730;GO:0005886;GO:0019843;GO:0009507;GO:0005773;GO:0005618;GO:0022627	162	T	I	T	I	3	S
gi|223994887|ref|XP_002287127.1|	RS18, ribosomal protein 18 40S small ribosomal subunit [Thalassiosira pseudonana CCMP1335]	RP-S18e, RPS18	K02964	GO:0005515;GO:0003735;GO:0006412;GO:0003723;GO:0042254;GO:0005730;GO:0005886;GO:0019843;GO:0009507;GO:0005773;GO:0005618;GO:0022627	174	C	T	C	T	3	S
gi|223994887|ref|XP_002287127.1|	RS18, ribosomal protein 18 40S small ribosomal subunit [Thalassiosira pseudonana CCMP1335]	RP-S18e, RPS18	K02964	GO:0005515;GO:0003735;GO:0006412;GO:0003723;GO:0042254;GO:0005730;GO:0005886;GO:0019843;GO:0009507;GO:0005773;GO:0005618;GO:0022627	180	T	I	T	I	3	S
gi|223994887|ref|XP_002287127.1|	RS18, ribosomal protein 18 40S small ribosomal subunit [Thalassiosira pseudonana CCMP1335]	RP-S18e, RPS18	K02964	GO:0005515;GO:0003735;GO:0006412;GO:0003723;GO:0042254;GO:0005730;GO:0005886;GO:0019843;GO:0009507;GO:0005773;GO:0005618;GO:0022627	192	G	R	G	R	3	S
gi|223994887|ref|XP_002287127.1|	RS18, ribosomal protein 18 40S small ribosomal subunit [Thalassiosira pseudonana CCMP1335]	RP-S18e, RPS18	K02964	GO:0005515;GO:0003735;GO:0006412;GO:0003723;GO:0042254;GO:0005730;GO:0005886;GO:0019843;GO:0009507;GO:0005773;GO:0005618;GO:0022627	201	A	K	A	K	3	S
gi|223994887|ref|XP_002287127.1|	RS18, ribosomal protein 18 40S small ribosomal subunit [Thalassiosira pseudonana CCMP1335]	RP-S18e, RPS18	K02964	GO:0005515;GO:0003735;GO:0006412;GO:0003723;GO:0042254;GO:0005730;GO:0005886;GO:0019843;GO:0009507;GO:0005773;GO:0005618;GO:0022627	204	C	A	C	A	3	S
gi|223994887|ref|XP_002287127.1|	RS18, ribosomal protein 18 40S small ribosomal subunit [Thalassiosira pseudonana CCMP1335]	RP-S18e, RPS18	K02964	GO:0005515;GO:0003735;GO:0006412;GO:0003723;GO:0042254;GO:0005730;GO:0005886;GO:0019843;GO:0009507;GO:0005773;GO:0005618;GO:0022627	225	G	G	G	G	3	S
gi|223994887|ref|XP_002287127.1|	RS18, ribosomal protein 18 40S small ribosomal subunit [Thalassiosira pseudonana CCMP1335]	RP-S18e, RPS18	K02964	GO:0005515;GO:0003735;GO:0006412;GO:0003723;GO:0042254;GO:0005730;GO:0005886;GO:0019843;GO:0009507;GO:0005773;GO:0005618;GO:0022627	228	A	E	A	E	3	S
gi|223994887|ref|XP_002287127.1|	RS18, ribosomal protein 18 40S small ribosomal subunit [Thalassiosira pseudonana CCMP1335]	RP-S18e, RPS18	K02964	GO:0005515;GO:0003735;GO:0006412;GO:0003723;GO:0042254;GO:0005730;GO:0005886;GO:0019843;GO:0009507;GO:0005773;GO:0005618;GO:0022627	246	A	E	A	E	3	S
gi|223994887|ref|XP_002287127.1|	RS18, ribosomal protein 18 40S small ribosomal subunit [Thalassiosira pseudonana CCMP1335]	RP-S18e, RPS18	K02964	GO:0005515;GO:0003735;GO:0006412;GO:0003723;GO:0042254;GO:0005730;GO:0005886;GO:0019843;GO:0009507;GO:0005773;GO:0005618;GO:0022627	255	T	I	T	I	3	S
gi|223994887|ref|XP_002287127.1|	RS18, ribosomal protein 18 40S small ribosomal subunit [Thalassiosira pseudonana CCMP1335]	RP-S18e, RPS18	K02964	GO:0005515;GO:0003735;GO:0006412;GO:0003723;GO:0042254;GO:0005730;GO:0005886;GO:0019843;GO:0009507;GO:0005773;GO:0005618;GO:0022627	261	A	N	A	N	3	S
gi|223994887|ref|XP_002287127.1|	RS18, ribosomal protein 18 40S small ribosomal subunit [Thalassiosira pseudonana CCMP1335]	RP-S18e, RPS18	K02964	GO:0005515;GO:0003735;GO:0006412;GO:0003723;GO:0042254;GO:0005730;GO:0005886;GO:0019843;GO:0009507;GO:0005773;GO:0005618;GO:0022627	264	C	P	C	P	3	S
gi|223994887|ref|XP_002287127.1|	RS18, ribosomal protein 18 40S small ribosomal subunit [Thalassiosira pseudonana CCMP1335]	RP-S18e, RPS18	K02964	GO:0005515;GO:0003735;GO:0006412;GO:0003723;GO:0042254;GO:0005730;GO:0005886;GO:0019843;GO:0009507;GO:0005773;GO:0005618;GO:0022627	279	C	P	C	P	3	S
gi|223994887|ref|XP_002287127.1|	RS18, ribosomal protein 18 40S small ribosomal subunit [Thalassiosira pseudonana CCMP1335]	RP-S18e, RPS18	K02964	GO:0005515;GO:0003735;GO:0006412;GO:0003723;GO:0042254;GO:0005730;GO:0005886;GO:0019843;GO:0009507;GO:0005773;GO:0005618;GO:0022627	297	G	R	G	R	3	S
gi|223994887|ref|XP_002287127.1|	RS18, ribosomal protein 18 40S small ribosomal subunit [Thalassiosira pseudonana CCMP1335]	RP-S18e, RPS18	K02964	GO:0005515;GO:0003735;GO:0006412;GO:0003723;GO:0042254;GO:0005730;GO:0005886;GO:0019843;GO:0009507;GO:0005773;GO:0005618;GO:0022627	306	A	D	A	D	3	S
gi|223994887|ref|XP_002287127.1|	RS18, ribosomal protein 18 40S small ribosomal subunit [Thalassiosira pseudonana CCMP1335]	RP-S18e, RPS18	K02964	GO:0005515;GO:0003735;GO:0006412;GO:0003723;GO:0042254;GO:0005730;GO:0005886;GO:0019843;GO:0009507;GO:0005773;GO:0005618;GO:0022627	312	A	D	A	D	3	S
gi|223994887|ref|XP_002287127.1|	RS18, ribosomal protein 18 40S small ribosomal subunit [Thalassiosira pseudonana CCMP1335]	RP-S18e, RPS18	K02964	GO:0005515;GO:0003735;GO:0006412;GO:0003723;GO:0042254;GO:0005730;GO:0005886;GO:0019843;GO:0009507;GO:0005773;GO:0005618;GO:0022627	315	G	G	G	G	3	S
gi|223994887|ref|XP_002287127.1|	RS18, ribosomal protein 18 40S small ribosomal subunit [Thalassiosira pseudonana CCMP1335]	RP-S18e, RPS18	K02964	GO:0005515;GO:0003735;GO:0006412;GO:0003723;GO:0042254;GO:0005730;GO:0005886;GO:0019843;GO:0009507;GO:0005773;GO:0005618;GO:0022627	327	T	V	T	V	3	S
gi|223994887|ref|XP_002287127.1|	RS18, ribosomal protein 18 40S small ribosomal subunit [Thalassiosira pseudonana CCMP1335]	RP-S18e, RPS18	K02964	GO:0005515;GO:0003735;GO:0006412;GO:0003723;GO:0042254;GO:0005730;GO:0005886;GO:0019843;GO:0009507;GO:0005773;GO:0005618;GO:0022627	348	G	R	G	R	3	S
gi|223994887|ref|XP_002287127.1|	RS18, ribosomal protein 18 40S small ribosomal subunit [Thalassiosira pseudonana CCMP1335]	RP-S18e, RPS18	K02964	GO:0005515;GO:0003735;GO:0006412;GO:0003723;GO:0042254;GO:0005730;GO:0005886;GO:0019843;GO:0009507;GO:0005773;GO:0005618;GO:0022627	363	G	R	G	R	3	S
gi|223994887|ref|XP_002287127.1|	RS18, ribosomal protein 18 40S small ribosomal subunit [Thalassiosira pseudonana CCMP1335]	RP-S18e, RPS18	K02964	GO:0005515;GO:0003735;GO:0006412;GO:0003723;GO:0042254;GO:0005730;GO:0005886;GO:0019843;GO:0009507;GO:0005773;GO:0005618;GO:0022627	375	T	I	T	I	3	S
gi|223994887|ref|XP_002287127.1|	RS18, ribosomal protein 18 40S small ribosomal subunit [Thalassiosira pseudonana CCMP1335]	RP-S18e, RPS18	K02964	GO:0005515;GO:0003735;GO:0006412;GO:0003723;GO:0042254;GO:0005730;GO:0005886;GO:0019843;GO:0009507;GO:0005773;GO:0005618;GO:0022627	381	A	H	A	H	3	S
gi|223994887|ref|XP_002287127.1|	RS18, ribosomal protein 18 40S small ribosomal subunit [Thalassiosira pseudonana CCMP1335]	RP-S18e, RPS18	K02964	GO:0005515;GO:0003735;GO:0006412;GO:0003723;GO:0042254;GO:0005730;GO:0005886;GO:0019843;GO:0009507;GO:0005773;GO:0005618;GO:0022627	384	G	G	G	G	3	S
gi|223994887|ref|XP_002287127.1|	RS18, ribosomal protein 18 40S small ribosomal subunit [Thalassiosira pseudonana CCMP1335]	RP-S18e, RPS18	K02964	GO:0005515;GO:0003735;GO:0006412;GO:0003723;GO:0042254;GO:0005730;GO:0005886;GO:0019843;GO:0009507;GO:0005773;GO:0005618;GO:0022627	390	G	R	G	R	3	S
gi|223994887|ref|XP_002287127.1|	RS18, ribosomal protein 18 40S small ribosomal subunit [Thalassiosira pseudonana CCMP1335]	RP-S18e, RPS18	K02964	GO:0005515;GO:0003735;GO:0006412;GO:0003723;GO:0042254;GO:0005730;GO:0005886;GO:0019843;GO:0009507;GO:0005773;GO:0005618;GO:0022627	408	T	V	T	V	3	S
gi|223994887|ref|XP_002287127.1|	RS18, ribosomal protein 18 40S small ribosomal subunit [Thalassiosira pseudonana CCMP1335]	RP-S18e, RPS18	K02964	GO:0005515;GO:0003735;GO:0006412;GO:0003723;GO:0042254;GO:0005730;GO:0005886;GO:0019843;GO:0009507;GO:0005773;GO:0005618;GO:0022627	411	G	R	G	R	3	S
gi|223994887|ref|XP_002287127.1|	RS18, ribosomal protein 18 40S small ribosomal subunit [Thalassiosira pseudonana CCMP1335]	RP-S18e, RPS18	K02964	GO:0005515;GO:0003735;GO:0006412;GO:0003723;GO:0042254;GO:0005730;GO:0005886;GO:0019843;GO:0009507;GO:0005773;GO:0005618;GO:0022627	432	C	T	C	T	3	S
gi|223994887|ref|XP_002287127.1|	RS18, ribosomal protein 18 40S small ribosomal subunit [Thalassiosira pseudonana CCMP1335]	RP-S18e, RPS18	K02964	GO:0005515;GO:0003735;GO:0006412;GO:0003723;GO:0042254;GO:0005730;GO:0005886;GO:0019843;GO:0009507;GO:0005773;GO:0005618;GO:0022627	441	G	R	G	R	3	S
gi|223994887|ref|XP_002287127.1|	RS18, ribosomal protein 18 40S small ribosomal subunit [Thalassiosira pseudonana CCMP1335]	RP-S18e, RPS18	K02964	GO:0005515;GO:0003735;GO:0006412;GO:0003723;GO:0042254;GO:0005730;GO:0005886;GO:0019843;GO:0009507;GO:0005773;GO:0005618;GO:0022627	447	C	T	C	T	3	S
gi|223994887|ref|XP_002287127.1|	RS18, ribosomal protein 18 40S small ribosomal subunit [Thalassiosira pseudonana CCMP1335]	RP-S18e, RPS18	K02964	GO:0005515;GO:0003735;GO:0006412;GO:0003723;GO:0042254;GO:0005730;GO:0005886;GO:0019843;GO:0009507;GO:0005773;GO:0005618;GO:0022627	465	A	K	A	K	3	S
gi|219117369|ref|XP_002179479.1|	predicted protein [Phaeodactylum tricornutum CCAP 1055/1]	RP-S15e, RPS15	K02958	GO:0015935;GO:0003735;GO:0006412;GO:0042254;GO:0019843;GO:0009507	147	C	S	C	S	3	S
gi|395518029|ref|XP_003763170.1|	PREDICTED: 60S acidic ribosomal protein P0-like [Sarcophilus harrisii]	RP-LP0, RPLP0	K02941	GO:0005737;GO:0005515;GO:0003735;GO:0000184;GO:0006614;GO:0006413;GO:0009790;GO:0043229;GO:0005840;GO:0003723;GO:0022625;GO:0006414;GO:0042254;GO:0005634;GO:0006415;GO:0030529;GO:0019083;GO:0019048	498	A	D	A	D	3	S
gi|395518029|ref|XP_003763170.1|	PREDICTED: 60S acidic ribosomal protein P0-like [Sarcophilus harrisii]	RP-LP0, RPLP0	K02941	GO:0005737;GO:0005515;GO:0003735;GO:0000184;GO:0006614;GO:0006413;GO:0009790;GO:0043229;GO:0005840;GO:0003723;GO:0022625;GO:0006414;GO:0042254;GO:0005634;GO:0006415;GO:0030529;GO:0019083;GO:0019048	501	T	V	T	V	3	S
gi|395518029|ref|XP_003763170.1|	PREDICTED: 60S acidic ribosomal protein P0-like [Sarcophilus harrisii]	RP-LP0, RPLP0	K02941	GO:0005737;GO:0005515;GO:0003735;GO:0000184;GO:0006614;GO:0006413;GO:0009790;GO:0043229;GO:0005840;GO:0003723;GO:0022625;GO:0006414;GO:0042254;GO:0005634;GO:0006415;GO:0030529;GO:0019083;GO:0019048	504	G	G	G	G	3	S
gi|395518029|ref|XP_003763170.1|	PREDICTED: 60S acidic ribosomal protein P0-like [Sarcophilus harrisii]	RP-LP0, RPLP0	K02941	GO:0005737;GO:0005515;GO:0003735;GO:0000184;GO:0006614;GO:0006413;GO:0009790;GO:0043229;GO:0005840;GO:0003723;GO:0022625;GO:0006414;GO:0042254;GO:0005634;GO:0006415;GO:0030529;GO:0019083;GO:0019048	510	C	A	C	A	3	S
gi|395518029|ref|XP_003763170.1|	PREDICTED: 60S acidic ribosomal protein P0-like [Sarcophilus harrisii]	RP-LP0, RPLP0	K02941	GO:0005737;GO:0005515;GO:0003735;GO:0000184;GO:0006614;GO:0006413;GO:0009790;GO:0043229;GO:0005840;GO:0003723;GO:0022625;GO:0006414;GO:0042254;GO:0005634;GO:0006415;GO:0030529;GO:0019083;GO:0019048	513	C	T	C	T	3	S
gi|395518029|ref|XP_003763170.1|	PREDICTED: 60S acidic ribosomal protein P0-like [Sarcophilus harrisii]	RP-LP0, RPLP0	K02941	GO:0005737;GO:0005515;GO:0003735;GO:0000184;GO:0006614;GO:0006413;GO:0009790;GO:0043229;GO:0005840;GO:0003723;GO:0022625;GO:0006414;GO:0042254;GO:0005634;GO:0006415;GO:0030529;GO:0019083;GO:0019048	528	A	N	A	N	3	S
gi|395518029|ref|XP_003763170.1|	PREDICTED: 60S acidic ribosomal protein P0-like [Sarcophilus harrisii]	RP-LP0, RPLP0	K02941	GO:0005737;GO:0005515;GO:0003735;GO:0000184;GO:0006614;GO:0006413;GO:0009790;GO:0043229;GO:0005840;GO:0003723;GO:0022625;GO:0006414;GO:0042254;GO:0005634;GO:0006415;GO:0030529;GO:0019083;GO:0019048	534	C	P	C	P	3	S
gi|395518029|ref|XP_003763170.1|	PREDICTED: 60S acidic ribosomal protein P0-like [Sarcophilus harrisii]	RP-LP0, RPLP0	K02941	GO:0005737;GO:0005515;GO:0003735;GO:0000184;GO:0006614;GO:0006413;GO:0009790;GO:0043229;GO:0005840;GO:0003723;GO:0022625;GO:0006414;GO:0042254;GO:0005634;GO:0006415;GO:0030529;GO:0019083;GO:0019048	540	C	S	C	S	3	S
gi|395518029|ref|XP_003763170.1|	PREDICTED: 60S acidic ribosomal protein P0-like [Sarcophilus harrisii]	RP-LP0, RPLP0	K02941	GO:0005737;GO:0005515;GO:0003735;GO:0000184;GO:0006614;GO:0006413;GO:0009790;GO:0043229;GO:0005840;GO:0003723;GO:0022625;GO:0006414;GO:0042254;GO:0005634;GO:0006415;GO:0030529;GO:0019083;GO:0019048	546	G	G	G	G	3	S
gi|395518029|ref|XP_003763170.1|	PREDICTED: 60S acidic ribosomal protein P0-like [Sarcophilus harrisii]	RP-LP0, RPLP0	K02941	GO:0005737;GO:0005515;GO:0003735;GO:0000184;GO:0006614;GO:0006413;GO:0009790;GO:0043229;GO:0005840;GO:0003723;GO:0022625;GO:0006414;GO:0042254;GO:0005634;GO:0006415;GO:0030529;GO:0019083;GO:0019048	555	T	V	T	V	3	S
gi|395518029|ref|XP_003763170.1|	PREDICTED: 60S acidic ribosomal protein P0-like [Sarcophilus harrisii]	RP-LP0, RPLP0	K02941	GO:0005737;GO:0005515;GO:0003735;GO:0000184;GO:0006614;GO:0006413;GO:0009790;GO:0043229;GO:0005840;GO:0003723;GO:0022625;GO:0006414;GO:0042254;GO:0005634;GO:0006415;GO:0030529;GO:0019083;GO:0019048	558	A	D	A	D	3	S
gi|395518029|ref|XP_003763170.1|	PREDICTED: 60S acidic ribosomal protein P0-like [Sarcophilus harrisii]	RP-LP0, RPLP0	K02941	GO:0005737;GO:0005515;GO:0003735;GO:0000184;GO:0006614;GO:0006413;GO:0009790;GO:0043229;GO:0005840;GO:0003723;GO:0022625;GO:0006414;GO:0042254;GO:0005634;GO:0006415;GO:0030529;GO:0019083;GO:0019048	564	G	G	G	G	3	S
gi|395518029|ref|XP_003763170.1|	PREDICTED: 60S acidic ribosomal protein P0-like [Sarcophilus harrisii]	RP-LP0, RPLP0	K02941	GO:0005737;GO:0005515;GO:0003735;GO:0000184;GO:0006614;GO:0006413;GO:0009790;GO:0043229;GO:0005840;GO:0003723;GO:0022625;GO:0006414;GO:0042254;GO:0005634;GO:0006415;GO:0030529;GO:0019083;GO:0019048	567	T	I	T	I	3	S
gi|395518029|ref|XP_003763170.1|	PREDICTED: 60S acidic ribosomal protein P0-like [Sarcophilus harrisii]	RP-LP0, RPLP0	K02941	GO:0005737;GO:0005515;GO:0003735;GO:0000184;GO:0006614;GO:0006413;GO:0009790;GO:0043229;GO:0005840;GO:0003723;GO:0022625;GO:0006414;GO:0042254;GO:0005634;GO:0006415;GO:0030529;GO:0019083;GO:0019048	570	A	Y	A	Y	3	S
gi|395518029|ref|XP_003763170.1|	PREDICTED: 60S acidic ribosomal protein P0-like [Sarcophilus harrisii]	RP-LP0, RPLP0	K02941	GO:0005737;GO:0005515;GO:0003735;GO:0000184;GO:0006614;GO:0006413;GO:0009790;GO:0043229;GO:0005840;GO:0003723;GO:0022625;GO:0006414;GO:0042254;GO:0005634;GO:0006415;GO:0030529;GO:0019083;GO:0019048	579	C	T	C	T	3	S
gi|395518029|ref|XP_003763170.1|	PREDICTED: 60S acidic ribosomal protein P0-like [Sarcophilus harrisii]	RP-LP0, RPLP0	K02941	GO:0005737;GO:0005515;GO:0003735;GO:0000184;GO:0006614;GO:0006413;GO:0009790;GO:0043229;GO:0005840;GO:0003723;GO:0022625;GO:0006414;GO:0042254;GO:0005634;GO:0006415;GO:0030529;GO:0019083;GO:0019048	582	A	E	A	E	3	S
gi|395518029|ref|XP_003763170.1|	PREDICTED: 60S acidic ribosomal protein P0-like [Sarcophilus harrisii]	RP-LP0, RPLP0	K02941	GO:0005737;GO:0005515;GO:0003735;GO:0000184;GO:0006614;GO:0006413;GO:0009790;GO:0043229;GO:0005840;GO:0003723;GO:0022625;GO:0006414;GO:0042254;GO:0005634;GO:0006415;GO:0030529;GO:0019083;GO:0019048	606	C	S	C	S	3	S
gi|395518029|ref|XP_003763170.1|	PREDICTED: 60S acidic ribosomal protein P0-like [Sarcophilus harrisii]	RP-LP0, RPLP0	K02941	GO:0005737;GO:0005515;GO:0003735;GO:0000184;GO:0006614;GO:0006413;GO:0009790;GO:0043229;GO:0005840;GO:0003723;GO:0022625;GO:0006414;GO:0042254;GO:0005634;GO:0006415;GO:0030529;GO:0019083;GO:0019048	630	T	V	T	V	3	S
gi|395518029|ref|XP_003763170.1|	PREDICTED: 60S acidic ribosomal protein P0-like [Sarcophilus harrisii]	RP-LP0, RPLP0	K02941	GO:0005737;GO:0005515;GO:0003735;GO:0000184;GO:0006614;GO:0006413;GO:0009790;GO:0043229;GO:0005840;GO:0003723;GO:0022625;GO:0006414;GO:0042254;GO:0005634;GO:0006415;GO:0030529;GO:0019083;GO:0019048	669	C	T	C	T	3	S
gi|395518029|ref|XP_003763170.1|	PREDICTED: 60S acidic ribosomal protein P0-like [Sarcophilus harrisii]	RP-LP0, RPLP0	K02941	GO:0005737;GO:0005515;GO:0003735;GO:0000184;GO:0006614;GO:0006413;GO:0009790;GO:0043229;GO:0005840;GO:0003723;GO:0022625;GO:0006414;GO:0042254;GO:0005634;GO:0006415;GO:0030529;GO:0019083;GO:0019048	711	C	T	C	T	3	S
gi|395518029|ref|XP_003763170.1|	PREDICTED: 60S acidic ribosomal protein P0-like [Sarcophilus harrisii]	RP-LP0, RPLP0	K02941	GO:0005737;GO:0005515;GO:0003735;GO:0000184;GO:0006614;GO:0006413;GO:0009790;GO:0043229;GO:0005840;GO:0003723;GO:0022625;GO:0006414;GO:0042254;GO:0005634;GO:0006415;GO:0030529;GO:0019083;GO:0019048	717	G	G	G	G	3	S
gi|395518029|ref|XP_003763170.1|	PREDICTED: 60S acidic ribosomal protein P0-like [Sarcophilus harrisii]	RP-LP0, RPLP0	K02941	GO:0005737;GO:0005515;GO:0003735;GO:0000184;GO:0006614;GO:0006413;GO:0009790;GO:0043229;GO:0005840;GO:0003723;GO:0022625;GO:0006414;GO:0042254;GO:0005634;GO:0006415;GO:0030529;GO:0019083;GO:0019048	759	G	C	G	C	3	S
gi|395518029|ref|XP_003763170.1|	PREDICTED: 60S acidic ribosomal protein P0-like [Sarcophilus harrisii]	RP-LP0, RPLP0	K02941	GO:0005737;GO:0005515;GO:0003735;GO:0000184;GO:0006614;GO:0006413;GO:0009790;GO:0043229;GO:0005840;GO:0003723;GO:0022625;GO:0006414;GO:0042254;GO:0005634;GO:0006415;GO:0030529;GO:0019083;GO:0019048	795	G	G	G	G	3	S
gi|219126467|ref|XP_002183478.1|	predicted protein [Phaeodactylum tricornutum CCAP 1055/1]	RP-L7e, RPL7	K02937	GO:0003735;GO:0042273;GO:0003729;GO:0000184;GO:0006364;GO:0006413;GO:0006614;GO:0005840;GO:0003677;GO:0022625;GO:0006414;GO:0005730;GO:0005886;GO:0009507;GO:0006415;GO:0042803;GO:0005773;GO:0005618;GO:0019083	420	T	F	T	F	3	S
gi|219126467|ref|XP_002183478.1|	predicted protein [Phaeodactylum tricornutum CCAP 1055/1]	RP-L7e, RPL7	K02937	GO:0003735;GO:0042273;GO:0003729;GO:0000184;GO:0006364;GO:0006413;GO:0006614;GO:0005840;GO:0003677;GO:0022625;GO:0006414;GO:0005730;GO:0005886;GO:0009507;GO:0006415;GO:0042803;GO:0005773;GO:0005618;GO:0019083	432	C	A	C	A	3	S
gi|219126467|ref|XP_002183478.1|	predicted protein [Phaeodactylum tricornutum CCAP 1055/1]	RP-L7e, RPL7	K02937	GO:0003735;GO:0042273;GO:0003729;GO:0000184;GO:0006364;GO:0006413;GO:0006614;GO:0005840;GO:0003677;GO:0022625;GO:0006414;GO:0005730;GO:0005886;GO:0009507;GO:0006415;GO:0042803;GO:0005773;GO:0005618;GO:0019083	447	T	V	T	V	3	S
gi|219126467|ref|XP_002183478.1|	predicted protein [Phaeodactylum tricornutum CCAP 1055/1]	RP-L7e, RPL7	K02937	GO:0003735;GO:0042273;GO:0003729;GO:0000184;GO:0006364;GO:0006413;GO:0006614;GO:0005840;GO:0003677;GO:0022625;GO:0006414;GO:0005730;GO:0005886;GO:0009507;GO:0006415;GO:0042803;GO:0005773;GO:0005618;GO:0019083	453	C	P	C	P	3	S
gi|219126467|ref|XP_002183478.1|	predicted protein [Phaeodactylum tricornutum CCAP 1055/1]	RP-L7e, RPL7	K02937	GO:0003735;GO:0042273;GO:0003729;GO:0000184;GO:0006364;GO:0006413;GO:0006614;GO:0005840;GO:0003677;GO:0022625;GO:0006414;GO:0005730;GO:0005886;GO:0009507;GO:0006415;GO:0042803;GO:0005773;GO:0005618;GO:0019083	459	C	A	C	A	3	S
gi|219126467|ref|XP_002183478.1|	predicted protein [Phaeodactylum tricornutum CCAP 1055/1]	RP-L7e, RPL7	K02937	GO:0003735;GO:0042273;GO:0003729;GO:0000184;GO:0006364;GO:0006413;GO:0006614;GO:0005840;GO:0003677;GO:0022625;GO:0006414;GO:0005730;GO:0005886;GO:0009507;GO:0006415;GO:0042803;GO:0005773;GO:0005618;GO:0019083	462	G	G	G	G	3	S
gi|219126467|ref|XP_002183478.1|	predicted protein [Phaeodactylum tricornutum CCAP 1055/1]	RP-L7e, RPL7	K02937	GO:0003735;GO:0042273;GO:0003729;GO:0000184;GO:0006364;GO:0006413;GO:0006614;GO:0005840;GO:0003677;GO:0022625;GO:0006414;GO:0005730;GO:0005886;GO:0009507;GO:0006415;GO:0042803;GO:0005773;GO:0005618;GO:0019083	471	A	N	A	N	3	S
gi|219126467|ref|XP_002183478.1|	predicted protein [Phaeodactylum tricornutum CCAP 1055/1]	RP-L7e, RPL7	K02937	GO:0003735;GO:0042273;GO:0003729;GO:0000184;GO:0006364;GO:0006413;GO:0006614;GO:0005840;GO:0003677;GO:0022625;GO:0006414;GO:0005730;GO:0005886;GO:0009507;GO:0006415;GO:0042803;GO:0005773;GO:0005618;GO:0019083	480	T	V	T	V	3	S
gi|219126467|ref|XP_002183478.1|	predicted protein [Phaeodactylum tricornutum CCAP 1055/1]	RP-L7e, RPL7	K02937	GO:0003735;GO:0042273;GO:0003729;GO:0000184;GO:0006364;GO:0006413;GO:0006614;GO:0005840;GO:0003677;GO:0022625;GO:0006414;GO:0005730;GO:0005886;GO:0009507;GO:0006415;GO:0042803;GO:0005773;GO:0005618;GO:0019083	486	A	E	A	E	3	S
gi|219126467|ref|XP_002183478.1|	predicted protein [Phaeodactylum tricornutum CCAP 1055/1]	RP-L7e, RPL7	K02937	GO:0003735;GO:0042273;GO:0003729;GO:0000184;GO:0006364;GO:0006413;GO:0006614;GO:0005840;GO:0003677;GO:0022625;GO:0006414;GO:0005730;GO:0005886;GO:0009507;GO:0006415;GO:0042803;GO:0005773;GO:0005618;GO:0019083	501	G	R	G	R	3	S
gi|219126467|ref|XP_002183478.1|	predicted protein [Phaeodactylum tricornutum CCAP 1055/1]	RP-L7e, RPL7	K02937	GO:0003735;GO:0042273;GO:0003729;GO:0000184;GO:0006364;GO:0006413;GO:0006614;GO:0005840;GO:0003677;GO:0022625;GO:0006414;GO:0005730;GO:0005886;GO:0009507;GO:0006415;GO:0042803;GO:0005773;GO:0005618;GO:0019083	504	G	G	G	G	3	S
gi|219126467|ref|XP_002183478.1|	predicted protein [Phaeodactylum tricornutum CCAP 1055/1]	RP-L7e, RPL7	K02937	GO:0003735;GO:0042273;GO:0003729;GO:0000184;GO:0006364;GO:0006413;GO:0006614;GO:0005840;GO:0003677;GO:0022625;GO:0006414;GO:0005730;GO:0005886;GO:0009507;GO:0006415;GO:0042803;GO:0005773;GO:0005618;GO:0019083	510	A	K	A	K	3	S
gi|219126467|ref|XP_002183478.1|	predicted protein [Phaeodactylum tricornutum CCAP 1055/1]	RP-L7e, RPL7	K02937	GO:0003735;GO:0042273;GO:0003729;GO:0000184;GO:0006364;GO:0006413;GO:0006614;GO:0005840;GO:0003677;GO:0022625;GO:0006414;GO:0005730;GO:0005886;GO:0009507;GO:0006415;GO:0042803;GO:0005773;GO:0005618;GO:0019083	516	A	N	A	N	3	S
gi|219126467|ref|XP_002183478.1|	predicted protein [Phaeodactylum tricornutum CCAP 1055/1]	RP-L7e, RPL7	K02937	GO:0003735;GO:0042273;GO:0003729;GO:0000184;GO:0006364;GO:0006413;GO:0006614;GO:0005840;GO:0003677;GO:0022625;GO:0006414;GO:0005730;GO:0005886;GO:0009507;GO:0006415;GO:0042803;GO:0005773;GO:0005618;GO:0019083	522	G	R	G	R	3	S
gi|219126467|ref|XP_002183478.1|	predicted protein [Phaeodactylum tricornutum CCAP 1055/1]	RP-L7e, RPL7	K02937	GO:0003735;GO:0042273;GO:0003729;GO:0000184;GO:0006364;GO:0006413;GO:0006614;GO:0005840;GO:0003677;GO:0022625;GO:0006414;GO:0005730;GO:0005886;GO:0009507;GO:0006415;GO:0042803;GO:0005773;GO:0005618;GO:0019083	528	C	T	C	T	3	S
gi|219126467|ref|XP_002183478.1|	predicted protein [Phaeodactylum tricornutum CCAP 1055/1]	RP-L7e, RPL7	K02937	GO:0003735;GO:0042273;GO:0003729;GO:0000184;GO:0006364;GO:0006413;GO:0006614;GO:0005840;GO:0003677;GO:0022625;GO:0006414;GO:0005730;GO:0005886;GO:0009507;GO:0006415;GO:0042803;GO:0005773;GO:0005618;GO:0019083	531	A	D	A	D	3	S
gi|219126467|ref|XP_002183478.1|	predicted protein [Phaeodactylum tricornutum CCAP 1055/1]	RP-L7e, RPL7	K02937	GO:0003735;GO:0042273;GO:0003729;GO:0000184;GO:0006364;GO:0006413;GO:0006614;GO:0005840;GO:0003677;GO:0022625;GO:0006414;GO:0005730;GO:0005886;GO:0009507;GO:0006415;GO:0042803;GO:0005773;GO:0005618;GO:0019083	543	G	G	G	G	3	S
gi|219126467|ref|XP_002183478.1|	predicted protein [Phaeodactylum tricornutum CCAP 1055/1]	RP-L7e, RPL7	K02937	GO:0003735;GO:0042273;GO:0003729;GO:0000184;GO:0006364;GO:0006413;GO:0006614;GO:0005840;GO:0003677;GO:0022625;GO:0006414;GO:0005730;GO:0005886;GO:0009507;GO:0006415;GO:0042803;GO:0005773;GO:0005618;GO:0019083	570	T	I	T	I	3	S
gi|219126467|ref|XP_002183478.1|	predicted protein [Phaeodactylum tricornutum CCAP 1055/1]	RP-L7e, RPL7	K02937	GO:0003735;GO:0042273;GO:0003729;GO:0000184;GO:0006364;GO:0006413;GO:0006614;GO:0005840;GO:0003677;GO:0022625;GO:0006414;GO:0005730;GO:0005886;GO:0009507;GO:0006415;GO:0042803;GO:0005773;GO:0005618;GO:0019083	573	A	H	A	H	3	S
gi|219126467|ref|XP_002183478.1|	predicted protein [Phaeodactylum tricornutum CCAP 1055/1]	RP-L7e, RPL7	K02937	GO:0003735;GO:0042273;GO:0003729;GO:0000184;GO:0006364;GO:0006413;GO:0006614;GO:0005840;GO:0003677;GO:0022625;GO:0006414;GO:0005730;GO:0005886;GO:0009507;GO:0006415;GO:0042803;GO:0005773;GO:0005618;GO:0019083	582	A	Y	A	Y	3	S
gi|219126467|ref|XP_002183478.1|	predicted protein [Phaeodactylum tricornutum CCAP 1055/1]	RP-L7e, RPL7	K02937	GO:0003735;GO:0042273;GO:0003729;GO:0000184;GO:0006364;GO:0006413;GO:0006614;GO:0005840;GO:0003677;GO:0022625;GO:0006414;GO:0005730;GO:0005886;GO:0009507;GO:0006415;GO:0042803;GO:0005773;GO:0005618;GO:0019083	585	C	T	C	T	3	S
gi|219126467|ref|XP_002183478.1|	predicted protein [Phaeodactylum tricornutum CCAP 1055/1]	RP-L7e, RPL7	K02937	GO:0003735;GO:0042273;GO:0003729;GO:0000184;GO:0006364;GO:0006413;GO:0006614;GO:0005840;GO:0003677;GO:0022625;GO:0006414;GO:0005730;GO:0005886;GO:0009507;GO:0006415;GO:0042803;GO:0005773;GO:0005618;GO:0019083	588	G	G	G	G	3	S
gi|219126467|ref|XP_002183478.1|	predicted protein [Phaeodactylum tricornutum CCAP 1055/1]	RP-L7e, RPL7	K02937	GO:0003735;GO:0042273;GO:0003729;GO:0000184;GO:0006364;GO:0006413;GO:0006614;GO:0005840;GO:0003677;GO:0022625;GO:0006414;GO:0005730;GO:0005886;GO:0009507;GO:0006415;GO:0042803;GO:0005773;GO:0005618;GO:0019083	594	A	K	A	K	3	S
gi|219126467|ref|XP_002183478.1|	predicted protein [Phaeodactylum tricornutum CCAP 1055/1]	RP-L7e, RPL7	K02937	GO:0003735;GO:0042273;GO:0003729;GO:0000184;GO:0006364;GO:0006413;GO:0006614;GO:0005840;GO:0003677;GO:0022625;GO:0006414;GO:0005730;GO:0005886;GO:0009507;GO:0006415;GO:0042803;GO:0005773;GO:0005618;GO:0019083	600	C	A	C	A	3	S
gi|219126467|ref|XP_002183478.1|	predicted protein [Phaeodactylum tricornutum CCAP 1055/1]	RP-L7e, RPL7	K02937	GO:0003735;GO:0042273;GO:0003729;GO:0000184;GO:0006364;GO:0006413;GO:0006614;GO:0005840;GO:0003677;GO:0022625;GO:0006414;GO:0005730;GO:0005886;GO:0009507;GO:0006415;GO:0042803;GO:0005773;GO:0005618;GO:0019083	603	A	N	A	N	3	S
gi|219126467|ref|XP_002183478.1|	predicted protein [Phaeodactylum tricornutum CCAP 1055/1]	RP-L7e, RPL7	K02937	GO:0003735;GO:0042273;GO:0003729;GO:0000184;GO:0006364;GO:0006413;GO:0006614;GO:0005840;GO:0003677;GO:0022625;GO:0006414;GO:0005730;GO:0005886;GO:0009507;GO:0006415;GO:0042803;GO:0005773;GO:0005618;GO:0019083	624	A	K	A	K	3	S
gi|219126467|ref|XP_002183478.1|	predicted protein [Phaeodactylum tricornutum CCAP 1055/1]	RP-L7e, RPL7	K02937	GO:0003735;GO:0042273;GO:0003729;GO:0000184;GO:0006364;GO:0006413;GO:0006614;GO:0005840;GO:0003677;GO:0022625;GO:0006414;GO:0005730;GO:0005886;GO:0009507;GO:0006415;GO:0042803;GO:0005773;GO:0005618;GO:0019083	630	C	S	C	S	3	S
gi|219126467|ref|XP_002183478.1|	predicted protein [Phaeodactylum tricornutum CCAP 1055/1]	RP-L7e, RPL7	K02937	GO:0003735;GO:0042273;GO:0003729;GO:0000184;GO:0006364;GO:0006413;GO:0006614;GO:0005840;GO:0003677;GO:0022625;GO:0006414;GO:0005730;GO:0005886;GO:0009507;GO:0006415;GO:0042803;GO:0005773;GO:0005618;GO:0019083	633	C	S	C	S	3	S
gi|219126467|ref|XP_002183478.1|	predicted protein [Phaeodactylum tricornutum CCAP 1055/1]	RP-L7e, RPL7	K02937	GO:0003735;GO:0042273;GO:0003729;GO:0000184;GO:0006364;GO:0006413;GO:0006614;GO:0005840;GO:0003677;GO:0022625;GO:0006414;GO:0005730;GO:0005886;GO:0009507;GO:0006415;GO:0042803;GO:0005773;GO:0005618;GO:0019083	636	C	P	C	P	3	S
gi|219126467|ref|XP_002183478.1|	predicted protein [Phaeodactylum tricornutum CCAP 1055/1]	RP-L7e, RPL7	K02937	GO:0003735;GO:0042273;GO:0003729;GO:0000184;GO:0006364;GO:0006413;GO:0006614;GO:0005840;GO:0003677;GO:0022625;GO:0006414;GO:0005730;GO:0005886;GO:0009507;GO:0006415;GO:0042803;GO:0005773;GO:0005618;GO:0019083	639	G	G	G	G	3	S
gi|219126467|ref|XP_002183478.1|	predicted protein [Phaeodactylum tricornutum CCAP 1055/1]	RP-L7e, RPL7	K02937	GO:0003735;GO:0042273;GO:0003729;GO:0000184;GO:0006364;GO:0006413;GO:0006614;GO:0005840;GO:0003677;GO:0022625;GO:0006414;GO:0005730;GO:0005886;GO:0009507;GO:0006415;GO:0042803;GO:0005773;GO:0005618;GO:0019083	642	G	G	G	G	3	S
gi|219126467|ref|XP_002183478.1|	predicted protein [Phaeodactylum tricornutum CCAP 1055/1]	RP-L7e, RPL7	K02937	GO:0003735;GO:0042273;GO:0003729;GO:0000184;GO:0006364;GO:0006413;GO:0006614;GO:0005840;GO:0003677;GO:0022625;GO:0006414;GO:0005730;GO:0005886;GO:0009507;GO:0006415;GO:0042803;GO:0005773;GO:0005618;GO:0019083	648	A	K	A	K	3	S
[truncated: 66,011 more rows]
